# Supplementary material for: Nuclear eDNA metabarcoding primers for anthozoan coral biodiversity assessment
Source: PeerJ journal article supplement (doi:10.7717/peerj.18607), 2024-11-26
Supplement: Supptables.xlsx [file Supptables.xlsx]

## Sheet: README
Supporting Tables – McCartin et al. 2024 Nuclear eDNA Meta-barcoding Primers for Anthozoan Coral Biodiversity Assessment Luke J. McCartin1,2, Emma Saso3, Samuel Vohsen1,2, Nicole C. Pittoors1,2, Penny Demetriades1, Catherine S. McFadden4, Andrea M. Quattrini3, and Santiago Herrera1,2,3* 1. Department of Biological Sciences, Lehigh University, Bethlehem, PA, USA 2. Lehigh Oceans Research Center, L…

## Sheet: Table S1
Table S1: Sample metadata for collections of corals made from field sites in the northwestern Gulf of Mexico that were DNA barcoded with conventional PCR/Sanger sequencing and/or genome skimming.
Sample number	Group	Identification	Cruise	Site	Dive	Date	Time	Lat	Long	Depth (m)
LII-10-379	Octocorallia	Callogorgia delta	Lophelia II	MC885	J2-527	2010-10-17	05:18:00	28.0663	-89.7159	630
SH10057	Octocorallia	Trachythela sp.	ECOGIG	MC344	GE06	2017-06-16	ND	28.6337	-88.1698	1850
SH10087	Octocorallia	Muricea pendula	OP17	AAR	CM4	2017-07-21	14:17:00	29.2502	-88.3385	71
SH10195	Octocorallia	Paramuriceidae	OP17	RTR	CM13	2017-07-27	05:58:00	29.4402	-87.5755	68
SH10223/5	Octocorallia	Paramuriceidae	OP17	RTR	CM14	2017-07-27	16:50:00	29.4388	-87.5767	66
SH10256	Octocorallia	Callistephanus sp.	OP17	KC405	CM20	2017-08-01	10:48:54	26.5705	-93.4834	1703
SH10264	Octocorallia	Sibogagorgia cauliflora	OP17	KC405	CM20	2017-08-01	12:48:04	26.5705	-93.4832	1695
SH10278	Octocorallia	Paramuricea biscaya	OP17	KC405	CM20	2017-08-01	15:42:43	26.5707	-93.4828	1666
SH10611	Octocorallia	Ellisella sp.	OP17	Diaphus	CM31	2017-08-08	06:05:00	28.0859	-90.6998	99
SH10725	Antipatharia	Stichopathes sp.	MT18	Sonnier	MH673	2018-09-18	09:49:13	28.353	-92.461	57
SH10745	Octocorallia	Carijoa riseii	MT18	Sonnier	MH675	2018-09-18	15:04:13	28.3527	-92.4694	53
SH10768	Octocorallia	Nicella sp.	MT18	Bouma	MH676	2018-09-19	08:48:24	28.0717	-92.4673	79.9
SH10858	Octocorallia	Paramuriceidae	MT18	Elvers	MH687	2018-09-20	16:37:27	27.8344	-92.891	97.7
SH10899	Octocorallia	Placogorgia cf. rudis/tenuis	MT18	Bright	MH692	2018-09-21	12:15:54	27.8913	-93.2605	118
SH10954	Octocorallia	Nicella sp.	MT18	McNeil	MH696	2018-09-22	08:07:41	28.0077	-93.4799	84.1
SH10978	Octocorallia	Malacalcyonacea	MT18	McNeil	MH698	2018-09-22	11:27:01	28.0072	-93.4801	84.7
SH10979	Octocorallia	Ellisella sp.	MT18	McNeil	MH698	2018-09-22	11:27:18	28.0072	-93.4801	84.7
SH10981	Octocorallia	Paramuriceidae	MT18	McNeil	MH699	2018-09-22	12:02:24	28.007	-93.4803	85
SH10985	Octocorallia	Bebryce_cf._cinerea/grandis	MT18	McNeil	MH699	2018-09-22	12:29:49	28.0071	-93.4805	83.6
SH11717	Octocorallia	Ellisella sp.	PE19	Diaphus	GE01	2019-04-26	15:25:56	28.0858	-90.7	ND
SH11720	Antipatharia	Stichopathes sp.	PE19	Diaphus	GE01	2019-04-26	16:15:49	28.086	-90.7	ND
SH11782	Octocorallia	Anthomastinae	PE19	GC852	GE04	2019-04-28	15:35:15	ND	ND	1412
SH11797	Antipatharia	Antipathes furcata	PE19	Alderdice	GE06	2019-04-29	14:08:10	28.0949	-92.0057	83
SH11805	Antipatharia	Antipathes atlantica	PE19	Alderdice	GE06	2019-04-29	16:45:55	28.095	-92.006	82
SH11833	Octocorallia	Thesea cf. rubra	PE19	McGrail	GE09	2019-04-30	03:33:45	27.9572	-92.5844	83.39
SH11835	Octocorallia	Thesea cf. rubra	PE19	McGrail	GE09	2019-04-30	03:50:02	27.9572	-92.5844	83.6
SH11839	Octocorallia	Leptogorgia cf. violacea	PE19	McGrail	GE09	2019-04-30	06:01:37	27.9585	-92.5841	81.87
SH11965	Octocorallia	Chironepthya cf. caribaea	PE19	EFGB	GE13	2019-05-06	00:05:48	27.8903	-93.6233	90.6
SH11968	Antipatharia	Tanacetipathes sp.	PE19	EFGB	GE13	2019-05-06	01:19:32	27.8906	-93.6233	91.58
SH12078	Antipatharia	Leiopathes glaberrima	PS21	VK826	GE12	2021-08-06	16:52:00	29.1571	-88.0147	487
SH12079	Antipatharia	Leiopathes sp. (white morphospecies)	PS21	VK826	GE12	2021-08-06	16:33:00	29.1571	-88.0146	488
SH12080	Octocorallia	Anthomastinae	PS21	VK826	GE12	2021-08-06	15:39:00	29.1572	-88.0163	479
SH12081	Octocorallia	Lateothela cf. grandiflora	PS21	VK826	GE12	2021-08-06	15:39:00	29.1572	-88.0164	482
SH12084	Antipatharia	Tanacetipathes cf. hirta	PS21	McGrail	GE15	2021-08-10	16:25:00	27.9576	-92.5805	90
SH12085	Antipatharia	Tanacetipathes cf. tanacetum	PS21	McGrail	GE15	2021-08-10	16:19:00	27.9576	-92.5804	90
SH12089	Octocorallia	Nicella sp.	PS21	McGrail	GE15	2021-08-10	15:16:00	27.9572	-92.5811	86
SH12089	Octocorallia	Nicella sp.	PS21	McGrail	GE15	2021-08-10	15:16:00	27.9572	-92.5811	86
SH12090	Octocorallia	Scleracis cf. guadalupensis	PS21	McGrail	GE15	2021-08-10	15:21:00	27.9572	-92.5811	86
SH12091	Octocorallia	Nicella sp.	PS21	McGrail	GE15	2021-08-10	15:13:00	27.9572	-92.5811	86
SH12092	Octocorallia	Nicella sp.	PS21	McGrail	GE15	2021-08-10	15:13:00	27.9572	-92.5811	86
SH12095	Octocorallia	Chironepthya cf. caribaea	PS21	Bright	GE16	2021-08-11	15:05:00	27.901	-92.2703	85
SH12098	Antipatharia	Stichopathes sp.	PS21	Stetson	GE17	2021-08-12	13:25:00	28.1569	-94.3028	54
SH12099	Octocorallia	Thesea nivea	PS21	Stetson	GE17	2021-08-12	12:44:00	28.1587	-94.3031	54
SH12101	Zoantharia	Umimayanthus parasiticus	PS21	Stetson	GE17	2021-08-12	~13:00	28.157	-94.3031	54
SH12107	Octocorallia	cf. Caliacis nutans	PS21	EFGB	GE18	2021-08-13	11:31:00	27.8907	-93.6197	79
SH12109	Octocorallia	Thesea sp.	PS21	EFGB	GE18	2021-08-13	11:24:00	27.8907	-93.6197	79
SH12114	Octocorallia	Callogorgia cf. gracilis	PS21	E. of Bright	GE20	2021-08-14	17:15:00	27.8952	-93.2668	114
SH12115	Octocorallia	Nidalia sp.	PS21	E. of Bright	GE20	2021-08-14	14:50:00	27.8956	-93.2678	111
SH12116	Antipatharia	Plumapathes pennacea	PS21	Bright	GE20	2021-08-14	13:20:00	27.8936	-93.2736	67
SH12117	Antipatharia	Antipathes atlantica	PS21	Bright	GE20	2021-08-14	13:34:00	27.8983	-93.2714	66
SH12118	Antipatharia	Elatopathes abietina	PS21	E. of Bright	GE20	2021-08-14	15:59:00	27.895	-93.2666	109
SH12120	Antipatharia	Aphanipathes pedata	PS21	E. of Bright	GE20	2021-08-14	16:48:00	27.8951	-93.2666	110
SH12123	Octocorallia	Ellisella sp.	PS21	Bright	GE20	2021-08-14	13:05:00	27.8984	-93.2524	67
SH12127	Antipatharia	Sibopathes sp.	PS21	GC354	GE22	2021-08-15	17:44:00	27.5986	-91.8256	531
SH12128	Octocorallia	Paracalyptrophora carinata	PS21	GC354	GE22	2021-08-15	16:39:00	27.5968	-91.8267	534
SH12129	Octocorallia	Paramuricea sp. (A/E)	PS21	GC354	GE22	2021-08-15	16:56:00	27.5973	-91.8268	527
SH12130	Octocorallia	Chelidonsis cf. aurantiaca mexicana	PS21	GC354	GE22	2021-08-15	16:50:00	27.5969	-91.8267	531

## Sheet: Table S2
Table S2: 28S barcode sequences of anthozoan corals generated in this study and downloaded from GenBank for taxonomic classification, as well as analyses of primer complementary and the ability of the 28S barcode amplified with the primers described herein to delineate taxonomic groups.
Citation	Sample ID	Sequencing method (this study only)	Kingdom	Phylum	Class	Order	Family	Genus	Species	Matches 28S-Anth-eDNA primer?	# of mismatches to 28S-Anth-eDNA	mismatch to 28S-Anth-eDNA positions	Matches 28S-Scler-eDNA primer?	# of mismatches to 28S-Scler-eDNA	mismatch to 28S-Scler-eDNA positions	Sequence
Chen et al. 2000, Marine Biotechnology	AF263360.1	NA	Animalia	Cnidaria	Anthozoa	Scleractinia	Euphyllidae	Galaxea	Galaxea fascicularis	yes	0	NA	yes	0	NA	GAGAGTTAAAGAGTACCTGAAACCGGCCCAAAGGAAACCAATGGACTTAACAATGCGCCCTCGAGATTCAGCCGGCCGGCCGGGCCCACCCGAGACGCGCGGATCCGAACGGACCGGCGGCCCGGGCCCGTCCCTCCCGGCCGTCGCACTTCTCTCGGGCGCGCGTCAACGTCGGTCGGCGACTGGGTCTGAAAGGTTCCGGGAAGGTGGGTCGGAGCTTCCCCCTCGGGGGCGGCTCCGGCCGTTATAGCCCGGTTCCCCTCTCGGCCCGGGCCCGACCGAGGCCCTCTTTGCAGGGCGCGCCTCTCCTGGCTGGGGTCCCGTCCCTCCGGCCGGCCGTCCACCGCGGCGGACTGCTCGCAGTGCTTCGCAACCGCGGCCGGTCGTTGGGCTGGTGAT…
Quattrini et al. 2020, Nature Ecology & Evolution	ANT103	NA	Animalia	Cnidaria	Anthozoa	Malacalcyonacea	Xeniidae	Caementabunda	Caementabunda simplex	yes	0	NA	no	NA	NA	GAGAGTTAAAAAGTACGTGAAACCGTTGAAAGGGAAGCGAATGGAGTTAGCAATTCGTCTGTCAGATTCAGTCGCTTACGCGTCACGACGTGCGCGCTCCCGATCCGAACGGACGAGTCGTGCACGGATGCGACGTGCGAGCGGCGCACTTCTGGCAGGCGAGCGTCAGCGTCGGTTGTTGTCGAACGACAAGGTTGCAGGGAAGGTAGACGTGCCCTCGTGGCTCGTTGTTAAGCCTTGCTATCGCATAGTTCGATGGCGACCGTGGCACTGCGACGCGTGCCTGGCTGGCGACTCAATTTCTCGGTCCAACATGTCGACCGTGGCGGACGGCACGCCTGTGCGCTCAAACTGCTGTTGGCCGTGAGATTGATGTTCGCACACTACGCGTCAAGGATG…
Quattrini et al. 2020, Nature Ecology & Evolution	ANT113	NA	Animalia	Cnidaria	Anthozoa	Zoantharia	Parazoanthidae			yes	0	NA	yes	2	46, 48	GAGAGTTAAAAAGTACGTGAAACCGTTGAAAGGGAAACGAATGGAGTTAGCAATGCACCCTGCAAGATTCAGCCGGCGGGTGGCGCGGACGGGCGGTTGGCGGATCTGAATGGACCGCCGTCGTCCGGCTCGCTCTCCCCTCCGTCGCACTTCTTGCGGGTGCGCGTCAACGTCGGTTCGGACCCGGTCTCAAAGTGTGAGGGAAGGTAGGTCGCGTCGCCTCGGCGTCGCTTCTGTTACAGCCCGCACTCGCATGGCCGGGCCCGGACCGAGGAGCCGCAGCGCATGCCTCTTCTGGCTAGGGTCCCTCCGTGCCGGTCGGTTGTCGACCGTGGTGGACTGCGTGCAGTGCGCCCAAACTGCTTCCGGTCGCCTCGGAGGTGACTTCGTACCATGCGC…
Quattrini et al. 2020, Nature Ecology & Evolution	ANT187	NA	Animalia	Cnidaria	Anthozoa	Scleractinia	Poritidae	Porites	Porites sverdrupi	yes	1	28	yes	0	NA	GAGAGTTAAAAAGTACGTGAAACCGTTTGAAGGGAAACGAATGGACTCAGCAATGCGCCCTTTGAGATTCAGCCGGGCGGTTGTGGCGGTGCGGGGCTTGCGGATCTGAATGGACCGCGGTCTCGGGCCCGTCGCTTCCGACCGTCGCACTTCTCTTGGACGCGAGTCAACGTCGGTTGGGACTGGGCCTCAAAGGTTCCGGGAAGGTAGGTCGGGACGCTCGCGTTCGGACTGTTACAGCCCGGTTCTCCATTTCCGGCTCGGGCCCGACCGAGGCAGATGCAGCACATGCCTCTTCTGGCTAGGGTCCCGTCCTTCCGGCCGGTTGTCGAATGCGGTGGACTGCTTGCAGTGCTCTGCGATTGCTGCCGGTCGTTGGGGTGGTGATCTCGTACCATG…
Quattrini et al. 2020, Nature Ecology & Evolution	ANT200	NA	Animalia	Cnidaria	Anthozoa	Scleractinia	Poritidae	Porites	Porites panamensis	yes	1	28	yes	0	NA	GAGAGTTAAAAAGTACGTGAAACCGTTTGAAGGGAAACGAATGGACTCAGCAATGCGCCCTTTGAGATTCAGCCGGGCGGTGGTGGCGGTGCGGGGCTTGCGGATCTGAATGGACCGCGGTCTCGGGCCCGTGGCCTCCGACCGTCGCACTTCTCTTGGACGCGAGTCAACGTCGGTTGGGACTGGGCCTCAAAGGTTCCGGGAAGGTAGGTCGGGACGCTCGCGTTCGGACTGTTACAGCCCGGTTCTCTCCCGGCTCGGGCCCGACCGAGGCAGATGCAGCACATGCCTCTTGTGGCTAGGGTCCCGTCCTTCCGGCCGGTTGTCGAATGCGGTGGACTGCTTGCAGTGCTCTGCGATTGCTGCCGGTCGTTGGGGTGGTGATCTCGTACCATGTGC…
Quattrini et al. 2020, Nature Ecology & Evolution	ANT201	NA	Animalia	Cnidaria	Anthozoa	Scleractinia	Poritidae	Porites	Porites panamensis	yes	1	28	yes	0	NA	GAGAGTTAAAAAGTACGTGAAACCGTTTGAAGGGAAACGAATGGACTCAGCAATGCGCCCTTTGAGATTCAGCCGGGCGGTGGTGGCGGTGCGGGGCTTGCGGATCTGAATGGACCGCGGTCTCGGGCCCGTGGCCTCCGACCGTCGCACTTCTCTTGGACGCGAGTCAACGTCGGTTGGGACTGGGCCTCAAAGGTTCCGGGAAGGTAGGTCGGGACGCTCGCGTTCGGACTGTTACAGCCCGGTTCTCTCCCGGCTCGGGCCCGACCGAGGCAGATGCAGCACATGCCTCTTGTGGCTAGGGTCCCGTCCTTCCGGCCGGTTGTCGAATGCGGTGGACTGCTTGCAGTGCTCTGCGATTGCTGCCGGTCGTTGGGGTGGTGATCTCGTACCATGTGC…
Medina et al. 2001, PNAS	AY026365.1	NA	Animalia	Cnidaria	Anthozoa	Antipatharia	Antipathidae	Antipathes	Antipathes galapagensis	yes	0	NA	no	NA	NA	GAGAGTTAAAAAGTACGTGAAACCGTTGAAAGGGAAACGAATGGAGCTAGCAATGCACCCTGCGAGATTCAGCCGGTGAGTGGCGCGGGCGCGCGGTTCGCAGATCTGAATTGACTGTGGCCGCGCGGTTCGCGCTCCCCGCCGTCGCACTTCTCGCGGGTGCGCGTCAACATGGGTCGGGACCGGGTCTCACAGGCGCGGGCAAGGTAGGTCCGTCCCCTCAGGGGGAGGGACTGTTTAGGCCCGCGTTCTAGCGGCTCGGGTCCGATCGAGGAGTCGCAGCACATGCCTCTTGTGGCTGGGGTCCCGTCTCTCCGGTTGGTTGTCGACCGTGGTGGACTGCTTGCAGTGCACCACGACTGCTGCCGGTCGCTGGGGCGGTGCTTCGCACTATGTGCT…
Medina et al. 2001, PNAS	AY026375.1	NA	Animalia	Cnidaria	Anthozoa	Scleractinia	Merulinidae	Orbicella	Orbicella franksi	yes	0	NA	yes	0	NA	GAGAGTTAAAAAGTACGTGAAACCGTTGAAAGGGAAACGAATGGACTCAGCAATGCGCCCTTTGAGATTCAGCCGGTGGGTGGGATCGGCCTCGGGTTTGCGGATCTGAATGGACCGCGGCCCGGTGCTCGTTTCTCCTGGCCGTCGCACTTCTCTTGGGCGCGCGTCAACGTCGGTTGGGACTGGGTCTGAAAGGTGCCGGGAAGGTAGGTGTGGGCCTTCGGGTCCGTTCTGCTACAGCCCGGTTCTCTCATGGCTCGGGCCCGACCGAGGCGTTGCAGGGCATGCCTCTTGTGGCTAGGGTCCCCTCCTTCCGGCCGGCTGTCGAATGTGGTGGACTGCTTGCAGTGCTCGACGAACGCTGCCGGTCGTTGGGGCGGTGATCTCGTACCATGCCCT…
Barbeitos et al. 2010, PNAS	EU262771.1	NA	Animalia	Cnidaria	Anthozoa	Scleractinia	Meandrinidae	Eusmilia	Eusmilia fastigiata	yes	0	NA	yes	0	NA	GAGAGTTAAAAAGTACGTGAAACCGTTGAAAGGGAAACGAATGGACTCAGCAATGCGCCGTTTGAGATTCAGCCGGTGGGTGGGATCGGCTCGGGGTTTGCGGATCTGAATGGACCGCGGCCTTGGGCTCGTTTCTCCTCGCCGTCGCACTTCTCTTGGGCGCGCGTCAACGTCGGTTGGGACTGGGTCTGAAAGGTGCCGGGAAGGTAGGTCTGGACCTCCGGGTCCGGTCTGTTACAGCCCGGTTCTCTCATGGCTCGGGCCCGACCGAGGAGTGGCAGCGCATGCCTCTTGTGGCTAGGGTGCCGTCCTTCCGGCCGGTTGTCGAATGCGGTGGACTGCTTGCAGTGCTCCGCGACCGCTGCCGGTCGTTGGGGTGGTGATCTCGTACCATGCGCT…
Barbeitos et al. 2010, PNAS	EU262772.1	NA	Animalia	Cnidaria	Anthozoa	Scleractinia	Faviidae	Diploria	Diploria labyrinthiformis	no	NA	NA	yes	0	NA	GAGAGTTAAAGAGTACGTGAAACCGTCTAGAGGGAAACGAATGGACTCAGCAATGCGCTCCGGCGAGATTCAGCCGGCGGGCGACCCTCGGTCCTTGGTTTCCGCGGATCCGAACGGACCGCGGCCTGGGGCTCGCGAGCTCCCGCCGTCGCACTTCTCTCGGGCGCGCGTCAACGTCGGTTGGGACTGGGTGTTAAGGGTGCCGGGAAGGTAGGTGCGGAGTTCCCCTCGGGGATCTTTTTTCCGCTCTGTTAACGTAGCCCGGCGTCTCGCATGACTCGGACCCGACCGAGGCGGTTATTCAGGGCATGCCTCTTGTGGCTAGGGTGCCGTCCTTCCGGCCGGCCGACCGACGCGGTGGACTGCTTGCAGTGCTCGGCCATGGCTACCGGTCGATTG…
Barbeitos et al. 2010, PNAS	EU262773.1	NA	Animalia	Cnidaria	Anthozoa	Scleractinia	Merulinidae	Echinopora	Echinopora lamellosa	yes	0	NA	yes	0	NA	GAGAGTTAAAAAGTACGTGAAACCGTTGGAAGGGAAACGAATGGACTCAGCAAGGCGCCGTTTTGAGATTCAGCCGGCCGGCGGGATCGGCCCGGGGTTTGCGGATCCGAACGGACCGCGGTCCCGGGCTCGTTCGTCCCGGCCGTCGCACTTCTCTTGGGCGCACGTCAACGTCGGTTGGGACTGGGTCTGAAAGGTCCCGGGAAGGTAGGTCCGCGCGTTCCTCCGAGTGCGCGCGCTCTGTTACAGCCCGGTTCTCTTGCGGCTCGGGCCCGACCGAGGCGGTCGCAGCGCATGCCTCTTCTGGCTAGGGTCCCGTCCGTCCGGCCGGTCGTCGACCGCGGTGGACTGCTTGCAGTGCTCCGCGACTGCTGCCGGTCGTTTGGGTGGTGACGTCGT…
Barbeitos et al. 2010, PNAS	EU262774.1	NA	Animalia	Cnidaria	Anthozoa	Scleractinia	Dendrophylliidae	Cladopsammia	Cladopsammia gracilis	yes	0	NA	yes	0	NA	GAGAGTTAAAAAGTACGTGAAACCGTTGGAAGGGAAACGAATGGACTCAGCAATGCGCCGTTTGAGATTCAGCCGGCCGGCGGGATCGGCTCGGGGTGTGCGGATCCGAATGGACCGCCGTCTCGGGCTCGTTTCTCCCGGCCGTCGCACTTCTCTTGGGCGCACGTCAACGTCGGTTGGGACTGGGTCTGAAAGGTTCCGGGAAGGTAGGTCCGCGCGTTCCTCGCGTTCGCGCGCTCTGTTACAGCCCGGTTCTCTTGCGGCTCGGGCCCGACCGAGGCGGTCGCAGCGCATGCCTCTTTTGGCTAGGGTCCCGTTCGTCCGGCCGGTTGTCGACCGCGGTGGACTGCTTGCAGTGCTCCGCGACTGCTGCCGGTCGTTCGGGCGGTGATCTCGTAC…
Barbeitos et al. 2010, PNAS	EU262775.1	NA	Animalia	Cnidaria	Anthozoa	Scleractinia	Fungiidae	Heliofungia	Heliofungia actiniformis	yes	1	27	yes	0	NA	GAGAGTTAAAAAGTACGTGAAACCGTCGAAAGGGAAACGAATGGACTCAGCAATGCGCCGTTTGAGATTCAGCCGGTGGGCGGGATCGGCGCGGGGTTTGCGGATCTGAATGGACCGCGGCTCCGGGCTCGCTTTCCCTCGCCGTCGCACTTCTCTTGGGCGCACGTCAACGTCGGTTGGAACTGGGTTTGAAAGGCGCCGGGAAGGTAGGTCTGGTCCTTCGGGTCCGGTCTGTTACAGCCCGGTGTTCTCATGGCTCGGCTCCGACCGAGGAGTCGCAGCGCATGCCTCTTGTGGCTAGGGTCCCGTCCTTCCGGCCGGTTGTCGAATGCGGTGGACTGCTTGCAGTGCTCCGCGACTGCTGCCGGTCGTTGGGGTGGTGATCTCGTACCATGCGCT…
Barbeitos et al. 2010, PNAS	EU262776.1	NA	Animalia	Cnidaria	Anthozoa	Scleractinia	Agariciidae	Gardineroseris	Gardineroseris planulata	yes	0	NA	yes	0	NA	GAGAGTTAAAAAGTACGTGAAACCGTTGGAAGGGAAACGAATGGACTCAGCAATGCGCCGTTTGAGATTCAGCCGGCGGGTGGTGCCGGCCCGGGGTTTGCGGATCTGAATGGACCGCGGTCCCGGGCTCGGAGCTCCCGGTCGTCGCACTTCTCTTGGGCGCGCGTCAACGTCGGTTGGGACTGGGTCTGAAAGGTGCCGGGAAGGTAGGTCTGTGCGTCCTCCGGGGTCGCTCGGTCTGTTACAGCCCGGTTCTCCTCGCGGCTCGGGCCCGACCGAGGCGGTGCAGCGCATGCCTCTCGCAAGGCTAGGGTCCCGTCCCTCCGGCCGGTTGTCGAATGTGGTGGACTGCTTGCAGTGCTCCGCGAATGCTGCCGGTCGTTGGGGTGGTGATCTCGT…
Barbeitos et al. 2010, PNAS	EU262777.1	NA	Animalia	Cnidaria	Anthozoa	Scleractinia	Caryophylliidae	Caryophyllia	Caryophyllia inornata	yes	0	NA	yes	0	NA	GAGAGTTAAAAAGTACGTGAAACCGTTAAAAGGGAAACGAATGGACTCAGCAATGCGCCGTTTGAGATTCAGCCGGTGGGTGGAATCGGCCAGGGGTTTGCGGATCCGAACGGACCGCGGTCTCTGGCTCGTCTCTCCCCGCCGTCGCACTTCTCTTGGGCGCGCGTCAACGTCGGTTGGGACTGGGTCTGAAAGTCGCCGGGAAGGTAGGTCTGGACCTCCGGGTCCGGTCTATTACAGCCCGGTCTCTCATGGCTCGGGCCCGACCGAGGAGTTGCAGCGCATGCCTCTTGTGGCTAGGGTCCCGTCCTTCCGGCCGGTTGTCGAATGCGGTGGACTGCTTGCAGTGCTCCGCGACTGCTGCCGGTCGTTGGGGTGGTGATCTCGTACCATGCGCTT…
Barbeitos et al. 2010, PNAS	EU262778.1	NA	Animalia	Cnidaria	Anthozoa	Scleractinia	Meandrinidae	Dichocoenia	Dichocoenia stokesii	yes	0	NA	yes	0	NA	GAGAGTTAAAAAGTACGTGAAACCGTTGAAAGGGAAACGAATGGACTCAGCAATGCGCCGTTTGAGATTCAGCCGGTGGGTGGGATCGGTTCGGGGTTTGCGGATCTGAATGGACCGCGGCCTTGGGCTCGTTTGTCCTCGCCGTCGCACTTCTCTTGGGCGCGCGTCAACGTCGGTTGGGACTGGGTCTGAAAGGTGCCGGGAAGGTAGGTCTGGACCTCCGGGTCCGGTCTGTTACAGCCCGGTTCTCTCATGGCTCGGGCCCGACCGAGGAGTGGCAGCGCATGCCTCTTGTGGCTAGGGTGCCGTCCTTCCGGCCGGTTGTCGAATGCGGTGGACTGCTTGCAGTGCTCCGCGACTGCTGCCGGTCGTTGGGGTGGTGATCTCGTACCATGCGCT…
Barbeitos et al. 2010, PNAS	EU262779.1	NA	Animalia	Cnidaria	Anthozoa	Scleractinia	Agariciidae	Agaricia	Agaricia lamarcki	yes	0	NA	yes	0	NA	GAGAGTTAAAAAGTACGTGAAACCGTTGGAAGGGAAACGAATGGACTCAGCAATGCGCCGTTTGAGATTCAGCCGGCGGGTGGCGTCGGCCCGGGGTTTGCGGATCTGAATGGACCGCGGTCCCGGGCCCGGTGCTCCCGGTCGTCGCACTTCTCTTGGGCGCGCGTCAACGTCGGTTGGGACTGGGTCTGAAAGGTGCCGGGAAGGTAGGTCTGTGCGTTCCCCTCTTCGGGGGGGGTCGCTCGGTCTGTTAGAGCCCGGTTCTCCTCGCGGCTCGGGCCCGACCGAGGCGGTTGCAGCGCATGCCTCTCGCAAGGCTAGGGTCCCGTCCCTCCGGCCGGTTGTCGAATGCGGTGGACTGCTTGCAGTGCTCCGCGAATGCTGCCGGTCGTTGGGGTG…
Barbeitos et al. 2010, PNAS	EU262780.1	NA	Animalia	Cnidaria	Anthozoa	Scleractinia	Faviidae	Mycetophyllia	Mycetophyllia lamarckiana	yes	0	NA	yes	0	NA	GAGAGTTAAAAAGTACGTGAAACCGTTGAAAGGGAAACGAATGGACTCAGCAATGCGCCCTTTGAGATTCAGCCGGCGGGCGGTCTTGGCCCCGGGTTTGCGGATCTGAATGGACCGCGGCCCTCGGCTCTCGATCTCCCCCGCCGTCGCACTTCTCTGGGGCGCGCGTCAACGTCGGTTGGGACTGGGTCTGAAAGGTGCCGGGAAGGTAGGAGCGGGCCTCCGGGCCGGCTCTGTTACAGCCCGGCTCTCCTTCATGGCTCGGGCCCGACCGAGGCGGTTGCAGGGCATGCCTCTTGTGGCTAGGGTGCCGCCCTTCCGGCCGGCTGTTCCAATGCGGTGGACTGCTTGCAGTGCTCGGCGACGGCTGCCGGTCGTTGGGGTGGTGATCTCGTATCA…
Barbeitos et al. 2010, PNAS	EU262781.1	NA	Animalia	Cnidaria	Anthozoa	Scleractinia	Merulinidae	Orbicella	Orbicella faveolata	yes	1	32	yes	0	NA	GAGAGTTAAAAAGTACGTGAAACCGTTGAAATGGAAACGAATGGGCTCAGCAATGCGCCGTTTGAGATTCAGCCGGTGGGTGGGATCGACGGCGGGTTTGCGGATCTGAATGGACCGCGGCCCGGTGCTCGTTTCTCCCCACCGTCGCACTTCTCTTGGGCGCGCGTCAACGTCGGTTGGGACTGGGTCTGAAAGGTACCGGGAAGGTAGGTGTGGGCCTCCGGGTCCGTGCTGTTACAGCCCGGTTCTCTCATGGCTCGGGCCCGACCGAGGAGTTGCAGGGCATGCCTCCTGTGGCTAGGGTCCCCTCCCTCCGGCCGGCTGTCCAATGCGGTGGACTGCTTGCAGTGCTCGGCGAACGCTGCCGGTCGTTGGGGTGGTGATCTCGTACCATGCCCT…
Barbeitos et al. 2010, PNAS	EU262782.1	NA	Animalia	Cnidaria	Anthozoa	Scleractinia	Turbinoliidae	Notocyathus	Notocyathus sp.	yes	0	NA	yes	0	NA	GAGAGTTAAAAAGTACGTGAAACCGTTGAAAGGGAAACGAATGGACTCAGCAATGCGCCGTTTGAGATTCAGCCGATCGGCGGGATCGGCTCTGGATTTGCGGATCCGAATGGACCGCGGTCCGGGGCTCGTTCCTGCCGGCCGTCGCACTTCTCTTGGGCGCACGTCAACGTCGGTTGGGTCTGGGTCTGAAAGGTTCCGGGAAGGTAAGTGCGTGCGTCCCTCGTGGTCGTTCGTTCCGTTACAGCCCGGTTCTCTCGCGACTCGGACTCGACCGAGGTAGTTGCAGCGCATGCCTCTTTTGGCTAGGGTCCCGTCCGTCCGGCCGGTCGTCGACCGCGGTGGACTGCTTGCAGTGCTCCGCGACTGCTGCCGGTCGTTCGGGTGGTGATCTCGTAC…
Barbeitos et al. 2010, PNAS	EU262783.1	NA	Animalia	Cnidaria	Anthozoa	Scleractinia	Flabellidae	Flabellum	Flabellum curvatum	yes	0	NA	yes	0	NA	GAGAGTTAAAAAGTACGTGAAACCGTTGAAAGGGAAACGAATGGGCTCAGCAATGCGCCGTTTGAGATTCAGCCGGTGGGCGGGATCGGTGCGGGGTTTGCGGATCTGAATGGACCGCGGCTTTGCGCTCGTTTCTCCTCGCCGTCGCACTTCTCTTGGGCGCGCGTCAACGTCGGTTGGGACTGGGTTTGAAAGGTGCCGGGAAGGTAGGTCTGGACCTTCGGGTTCGGTCTGTTACAGCCCGGTTCTCTCATGGCTCGGGCCTGACCGAGGAGTCGCAGCGCATGCCTCTTGTGGCTAGGGTGCCGTCCTTCCGGCCGGTTGTCGAACGTGGTGGACTGCTTGCAGTGCTCCGCGACTGCTGCCGGTCGTTGGGGTGGTGATCTCGTACCATGCGCT…
Barbeitos et al. 2010, PNAS	EU262784.1	NA	Animalia	Cnidaria	Anthozoa	Scleractinia	Poritidae	Porites	Porites compressa	yes	1	28	yes	0	NA	GAGAGTTAAAAAGTACGTGAAACCGTTTGAAGGGAAACGAATGGACTCAGCAATGCGCCCTTTGAGATTCAGCCGGGCGGTTGTGGCGGTCCGGGGCTTGCGGATCTGAATGGACCGCGGTCTTGGGCCCGTCGCTTCCGACCGTCGCACTTCTCTTGGACGCGAGTCAACGTCGGTTGGGACTGGGCCTCAAAGGTTCCGGGAAGGTAGGTCCGGACGCTTGCGTTCGGACTGTTACAGCCCGGTTCTCTCGCGGCTCGGGCCCGACCGAGGCGGATGCAGCACATGCCTCTTCTGGCTAGGGTCCCGTCCTTCCGGCCGGTTGTCGAATGCGGTGGACTGCTTGCAGTGCTCTGCGACTGCTGCCGGTCGTTGGGATGGTGATCTCGTACCATGTGC…
Barbeitos et al. 2010, PNAS	EU262785.1	NA	Animalia	Cnidaria	Anthozoa	Scleractinia	Agariciidae	Agaricia	Agaricia humilis	yes	0	NA	yes	0	NA	GAGAGTTAAAAAGTACGTGAAACCGTTGGAAGGGAAACGAATGGACTCAGCAATGCGCCGTTTGAGATTCAGCCGGCGGGTGGCGTCGGCCCGGGGTTTGCGGATCTGAATGGACCGCGGTCCCGGGCCCGGTGCTCCCGGTCGTCGCACTTCTCTTGGGCGCGCGTCAACGTCGGTTGGGACTGGGTCTGAAAGGTGCCGAGAAGGTAGGTCTGTGCGTTCCCCTCGGGGTCGCCCGGTCTGTTACAGCTCGGTTCTCTTCGCGGCTCGGGCCCGACCGAGGCGGTTGCAGCGCATGCCTCTCGTAAGGCTAGGGTCCCGTCCCTCCGGCCGGTTGTCGAATGCGGTGGACTGCGTGCAGTGCTCCGCGAATGCTGCCGGTCGTTGGGGTGGTGATCT…
Barbeitos et al. 2010, PNAS	EU262786.1	NA	Animalia	Cnidaria	Anthozoa	Corallimorpharia	Discosomidae	Rhodactis	Rhodactis sp.	yes	2	18, 27	yes	2	46, 48	GAGAGTTAAAAAGTACGCGAAACCGTCGAAAGGGAAACGAATGGAGTTAGCAATGCGCCCCTCGAGATTCAGCCGGCGGGCTCGGTTCCCCGCCGTCGCACTTCTCTTGGGCGCGCGTCAGCGTGGGTTGGTCTCCGGGCTTGAAAGGTGCGGGCAAGGTGGGTGCGGGGGTCTCCGGGCCCTCGTTCTGTTACAGGCCCGCTCTCTCTGGTGGCTCGGGGCCGACCGAGGTGGTCGCAGCGCATGCCTCTTGTGGCTAGGGTCCCGCCCTTCCGGTTGGCGTTTTTCGACTGCGGTGGACTGCTTGCAGTGCTCCGCGACCGGCGCCGGCCGTTGGGGTGGTGATCTCGTACCATGCGCTTAGGATGCTGGCGGTCATATGGCTCCATCCGACCCGTC…
Barbeitos et al. 2010, PNAS	EU262787.1	NA	Animalia	Cnidaria	Anthozoa	Scleractinia	Merulinidae	Mycedium	Mycedium sp.	yes	0	NA	no	NA	NA	GAGAATTAAAAAGTATCTAAAACCGTCAAAAGGGAAGCAAATGGACTCAGCAATGCGCCCTCTGAGATTCAGCCGGTGGATGGCGGCGGCGCTGGGCTTGCGGATCTGAATGGGCCGTGGCCCGGCGCCCGCTTCCCCCCGCCATCGCACTTCTCTGCGGCGCGTGTCAACGTGCGTTGGGACTGGGTCTGAAAGGTGCCGGGAACGTAGGTGTGGGCCTCCGGGTCCGTGCCATTGGAGCCCGGTTCTCGTGGTTCGGCCCCGACTGAGGAGCGACACGCAGGGCATGCCTCTTGTGGCTAGGGTACCGTCCTTCCAGCCGGTTGTCCAGTGCAGTGGACTGCTTGCAGTGCTCTGCGACGGCTACCGGTCGTTGGGGTGGTGATCTCGTACCATGCC…
Barbeitos et al. 2010, PNAS	EU262788.1	NA	Animalia	Cnidaria	Anthozoa	Scleractinia	Caryophylliidae	Thalamophyllia	Thalamophyllia gasti	yes	0	NA	yes	0	NA	GAGAGTTAAAAAGTACGTGAAACCGTTGGAAGGGAAACGAATGGACTCAGCAATGCGCCGTTTGAGATTCAGCCGGCGGGTGAGGTCGTCCCGGGGTTTGCGGATCTGAATGGACCGCGGTCTCGGGTGGGGCCTTCTCTTGCCGTCGCACTTCTCTTGGGCGCGCGTCAACGTCGGTCGGGACTGGGTCTGAAAGGTGCCGGGAAGGTAGGTCTGAGCGTCCCCTCGGGGGCGTTCGGTCTGTTACAGCCCGGTTCTCTCTTGGCTCGGGCCCGACCGAGGCAGTGTTGCAGCGCATGCCTCTTGTGGCTAGGGTCCCGTCCCTCCGGCCGGTCGTCGAATGCGGTGGACTGCTTGCAGTGCTCCGCGACCGCTGCCGGTCGTTGGGGTGGTGATCTC…
Barbeitos et al. 2010, PNAS	EU262789.1	NA	Animalia	Cnidaria	Anthozoa	Scleractinia	Agariciidae	Agaricia	Agaricia undata	yes	0	NA	yes	0	NA	GAGAGTTAAAAAGTACGTGAAACCGTTGGAAGGGAAACGAATGGACTCAGCAATGCGCCGTTTGAGATTCAGCCGGCGGGTGGCGTCGGCCCGGGGTTTGCGGATCTGAATGGACCGCGGTCCCGGGCCCGGTGCTCCCGGTCGTCGCACTTCTCTTGGGCGCGCGTCAACGTCGGTTGGGACTGGGTCTGAAAGGTGCCGGGAAGGTAGGTCTGTGCGTTCCCCTCTTCGGGGGGGGGTCGTTCGGTCTGTTAGAGCCCGGTTCTCCTCGCGGCTCGGGCCCGACCGAGGCGGTTGCAGCGCATGCCTCTCGCAAGGCTAGGGTCCCGTCCCTCCGGCCGGTTGTCGAATGCGGTGGACTGCTTGCAGTGCTCCGCGAATGCTGCCGGTCGTTGGGGT…
Barbeitos et al. 2010, PNAS	EU262790.1	NA	Animalia	Cnidaria	Anthozoa	Scleractinia	Caryophylliidae	Polycyathus	Polycyathus muellerae	yes	0	NA	yes	0	NA	GAGAGTTAAAAAGTACGTGAAACCGTTGAAAGGGAAACGAATGGACTCAGCAATGCGCCGTTTGAGATTCAGCCGGCGGGCGGGATCGGCGCGGGGTTTGCGGATCTGAATGGACCGCGGCTTCGCGCTCGTTTCTCCTCGCCGTCGCACTTCTCTTGGGCGCGCGTCAACGTCGGTTGGGACTGGGTTTGAAAGGTGCCGGGAAGGTAGGTCTGGACCTTCGGGTTCGGTCTGTTACAGCCCGGTTCTCTCATGGCTCGGGCCTGACCGAGGAGTCGCAGCGCATGCCTCTTGTGGCTAGGGTGCCGTCCTTCCGGCCGGTTGTCGAACGTGGTGGACTGCTTGCAGTGCTCCGCGACTGCTGCCGGTCGTTGGGGTGGTGATCTCGTACCATGCGCT…
Barbeitos et al. 2010, PNAS	EU262791.1	NA	Animalia	Cnidaria	Anthozoa	Scleractinia	Agariciidae	Agaricia	Agaricia agaricites	yes	0	NA	yes	0	NA	GAGAGTTAAAAAGTACGTGAAACCGTTGGAAGGGAAACGAATGGACTCAGCAATGCGCCGTTTGAGATTCAGCCGGCGGGTGGCGTCGGCCCGGGGTTTGCGGATCTGAATGGACCGCGGTCCCGGGCCCGGCGCTCCCGGTCGTCGCACTTCTCTTGGGCGCGCGTCAACGTCGGTTGGGACTGGGTCTGAAAGGTGCCGAGAAGGTAGGTCTGTGCGTTCCCCTCGGGGTCGCCCGGTCTGTTACAGCTCGGTTCTCTTCGCGGCTCGGGCCCGACCGAGGCGGTTGCAGCGCATGCCTCTCGTAAGGCTAGGGTCCCGTCCCTCCGGCCGGTCGTCGAATGCGGTGGACTGCGTGCAGTGCTCCGCGAATGCTGCCGGTCGTTGGGGTGGTGATCT…
Barbeitos et al. 2010, PNAS	EU262792.1	NA	Animalia	Cnidaria	Anthozoa	Scleractinia	Pocilloporidae	Madracis	Madracis formosa	yes	1	27	yes	0	NA	GAGAGTTAAAAAGTACGTGAAACCGTCGAAAGGGAAACGAATGGACTCAGCAATGTGCCGTTTGAGATTCAGCCGCGCGGGCGGGTGCGGCTCGGGGTTTGCGGATCTGAATGGACCGCGGTCTCGGGCTCGTTTCCCCCCGCCGGCGCACTTCTCTTGGGCGCGCGTCAACGTCGGTTGGAACTGGGCCTGAAAGGTGCCGGGAAGGTAGGTTCGCACCCTCGGGTGCGGACTGTTACAGCCCGGCTCTTGCGGCTCGGGTCTGACCGTGGCGGTTGCAGTGCATGCCTCTTGTGGCTAGGGTCCCGCCCTTCCGGCCGGTCGTCGAATGCGGTGGACTGCTTGCAGTGCTCCGCGACCGCTGCCGGTCGTTGGGGTGGTGATCTCGTACCATGCACT…
Barbeitos et al. 2010, PNAS	EU262793.1	NA	Animalia	Cnidaria	Anthozoa	Corallimorpharia	Discosomidae	Discosoma	Discosoma sp.	yes	2	28, 27	yes	1	46	GAGAGTTAAAAAGTACGTGAAACCGTCCGAAGGGAAACGAATGGAGTCAGCAATGCGTCCCTGTGCTTGAGGTTCAGCCGGCGGGAGGCCGAGGCGCCGAGTGTAACTGCCGCCGCTCGCGGATCCGCACGGACCGCGGCTCGGCGCGCTCGGATTTTGCTCTTCCCGCCGTCGCATTTCTCTGGGGCGCGCGTCAACGTGGGTTGGCACCGGGCTTGAAAGACTCCGGCAAGGTAGGACGCGGAGGCTGCCTCCGACCGTCCCTTCGTGGGCGGCGGCATCGGGCCGAAAGGCGTCAGCTCCGTTTACAGGCCGGCTCCTTCTCCTCTCCGCCCCCCTTTTGGCTTGCCGAGGCGGGGGGTTGGAGGGCATCGAGAGTACGATGGCCCGGGGCCGACC…
Barbeitos et al. 2010, PNAS	EU262794.1	NA	Animalia	Cnidaria	Anthozoa	Scleractinia	Montastraeidae	Montastraea	Montastraea sp.	yes	1	27	yes	0	NA	GAGAGTTAAAAAGTACGTGAAACCGTCGAAAGGGAAACGAATGGACTCAGCAATGCGCCCTTTGAGATTCAGCCGGCGGGCGGTCTTGGCCCCGGGTTTGCGGATCTGAATGGACCGCGGCCCTCGGCTCTCGATCTCCCCCGCCGTCGCACTTCTCTGGGGCGCGCGTCAACGTCGGTTGGGACTGGGTCTGAAAGGTGCCGGGAAGGTAGGAGCGGGCCTTCGGGTCGGCTCTGTTACAGCCCGGCTCTCCTTCATGGCTCGGGCCCGACCGAGGCGGTTGCAGGGCATGCCTCTTGTGGCTAGGGTGCCGCCCTTCCGGCCGGCTGTTCCAGTGCGGTGGACTGCTTGCAGTGCTCGGCGACGGCTGCCGGTCGTTGGGGTGGTGATCTCGTACCA…
Barbeitos et al. 2010, PNAS	EU262795.1	NA	Animalia	Cnidaria	Anthozoa	Scleractinia	Caryophylliidae	Stephanocyathus	Stephanocyathus coronatus	yes	0	NA	yes	0	NA	GAGAGTTAAAAAGTACGTGAAACCGTTGAAAGGGAAACGAATGGACTCAGCAATGCGCCGTTTGAGATTCAGCCGGTGGGCGGGATCGGTCCGGCGGCTTGCGGATCCGAACGGACCGCGGCCCCGGACTCGTTCCCCCCGGCCGTCGCACTTCTCTTGGGCGCGCGTCAACGTCGGTTGGGACTGGGTCTGAAAGGTGCCGGGAAGGTAGGTTCGGCGGAGCTCGCTTCGCCGCTCTGTTACAGCCCGGTCATTCTCATGGCCCGGGCCCGACCGAGGAGTTTGCAGCGCATGCCTCGTGTGGCTAGGGTCCCGACCTTCCGGCCGGTTGTCGAATGCGGTGGACTGCTTGCAGTGTTCCGCGGCCGCTGCCGGTCGTTGGGGTGGTGATCTCGTAAG…
Barbeitos et al. 2010, PNAS	EU262796.1	NA	Animalia	Cnidaria	Anthozoa	Scleractinia	Caryophylliidae	Rhizosmilia	Rhizosmilia maculata	yes	0	NA	yes	0	NA	GAGAGTTAAAAAGTACGTGAAACCGTTGAAAGGGAAACGAATGGACTCAGCAATGCGCCGTTTGAGATTCAGCCGGAGGGTGGGATCGGCTTGGGGCTTGCGGATCTGAATGGACCGCGGCCTGGGGCTCGTTTCTCCTCGCCGTCGCACTTCTCTTGGGCGCGCGTCAACGTCGGTTGGGACTGGGTCTGAAAGGTGCCGGGAAGGTAGGTCTGGACCTCCGGGTCCGGTCTGTTACAGCCCGGTTCTCTCATGGCTCGGGCCCGACCGAGGAGTCGCAGCGCATGCCTCTTGTGGCTAGGGTGCCGTCCTTCCGGCCGGTTGTCGAATGTGGTGGACTGCTTGCAGTGCTCCGCGACTGCTGCCGGTCGTTGGGGTGGTGATCTCGTACCATGCGCT…
Barbeitos et al. 2010, PNAS	EU262797.1	NA	Animalia	Cnidaria	Anthozoa	Scleractinia	Fungiidae	Halomitra	Halomitra sp.	yes	1	27	yes	0	NA	GAGAGTTAAAAAGTACGTGAAACCGTCGAAAGGGAAACGAATGGACTCAGCAATGCGCCGTTTGAGATTCAGCCGGTGGGCGGGATCGGCGCGGGGTTTGCGGATCTGAATGGACCGCGGCTCCGTGCTCGTTTTCCCTCGCCGTCGCACTTCTCTTGGGCGCACGTCAACGTCGGTTGGAACTGGGTTTGAAAGGCGCCGGGAAGGTAGGTCTGGTCCTTCGGGTCCGGTCTGTTACAGCCCGGTGTTCTCATGGCTCGGGTCCGACCGAGGAGTCGCAGCGCATGCCTCTTGTGGCTAGGGTCCCGTCCTTCCGGCCGGTTGTCGAATGCGGTGGACTGCTTGCAGTGCTCCGTGACTGCTGCCGGTCGTTGGGGTGGTGATCTCGTACCATGCGCT…
Barbeitos et al. 2010, PNAS	EU262798.1	NA	Animalia	Cnidaria	Anthozoa	Scleractinia	Caryophylliidae	Phyllangia	Phyllangia americana mouchezii	yes	0	NA	yes	0	NA	GAGAGTTAAAAAGTACGTGAAACCGTTGAAAGGGAAACGAATGGACTCAGCAATGCGCCGTTTGAGATTCAGCCGGAGGGTGGGATCGGCTCGGGGCTTGCGGATCTGAATGGACCGCGGCCTTGGGCTCGTTTCTCCTCGCCGTCGCACTTCTCTTGGGCGCGCGTCAACGTCGGTTGGGACTGGGTCTGAAAGGTGCCGGGAAGGTAGGTCTGGACCTCCGGGTCTGGTCTGTTACAGCCCGGTTCTCTCATGGCTCGGGCTCGACCGAGGAGTCGCAGCGCATGCCTCTTGTGGCTAGGGTGCCGTCCTTCCGGCCGGTTGTCGAATGTGGTGGACTGCTTGCAGTGCTCCGCGACTGCTGCCGGTCGTTGGGGTGGTGATCTCGTACCATGCGCT…
Barbeitos et al. 2010, PNAS	EU262799.1	NA	Animalia	Cnidaria	Anthozoa	Scleractinia	Dendrophylliidae	Duncanopsammia	Duncanopsammia peltata	yes	0	NA	yes	0	NA	GAGAGTTAAAAAGTACGTGAAACCGTTGGAAGGGAAACGAATGGACTCAGCAAGGCGCCGTTTTGAGATTCAGCCGGCCGGCGGGATCGGCCCGGGGTTTGCGGATCCGAACGGACCGCGGTCCCGGGCTCGTTCGTCCCGGCCGTCGCACTTCTCTTGGGCGCACGTCAACGTCGGTTGGGACTGGGTCTGAAAGGTCCCGGGAAGGTAGGTCCGCGCGTTCCTCCGAGTGCGCGCGCTCTGTTACAGCCCGGTTCTCTTGCGGCTCGGGCCCGACCGAGGCGGTCGCAGCGCATGCCTCTTGTGGCTAGGGTCCCGTCCGTCCGGCCGGTCGTCGACCGCGGTGGACTGCTTGCAGTGCTCCGCGACTGCTGCCGGTCGTTTGGGTGGTGACGTCGT…
Barbeitos et al. 2010, PNAS	EU262800.1	NA	Animalia	Cnidaria	Anthozoa	Scleractinia	Scleractinia_incertae_sedis	Solenastrea	Solenastrea sp.	yes	0	NA	yes	0	NA	GAGAGTTAAAAAGTACGTGAAACCGTTGAAAGGGAAACGAATGGACTCAGCAATGCGCCGTTTGAGATTCAGCCGGTGGGCGGGATCGGCGCTGGGTTTGCGGATCTGAATGGACCGCGGCCTTGCGCTCGTTTCTCCTCGCCGTCGCACTTCTCTTGGGCGCGCGTCAACGTCGGTTGGGACTGGGTTTGAAAGGTGCCGGGAAGGTAGGTCTGGACCTTCGGGTTCGGTCTGTTACAGCCCGGTTCTCTCATGGCTCGGGCCCGACCGAGGAGTCGCAGCGCATGCCTCTTGTGGCTAGGGTGCCGTCCTTCCGGCCGGTTGTCGAACGTGGTGGACTGCTTGCAGTGCTCCGCGACTGCTGCCGGTCGTTGGGGTGGTGATCTCGTACTATGCGCT…
Barbeitos et al. 2010, PNAS	EU262801.1	NA	Animalia	Cnidaria	Anthozoa	Scleractinia	Poritidae	Porites	Porites branneri	yes	1	28	yes	0	NA	GAGAGTTAAAAAGTACGTGAAACCGTTTGAAGGGAAACGAATGGACTCAGCAATGCGCCCTTTGAGATTCAGCCGGGCGGTTGTGGCGGTCCGGGGCTTGCGGATCTGAATGGACCGCGGTCTCGGGCCCGTTGCTTCCGACCGTCGCACTTCTCTTGGACGCGAGTCAACGTCGGTTGGGACTGGGCCTCAAAGGTTCCGGGAAGGTAGGTCGGGACGCTCGCGTTCGGACTGTTACAGCCCGGTTCTCTCCCGGCTCGGGCCCGACCGAGGCGGATGCAGCACATGCCTCTTCTGGCTAGGGTCCCGTCCTTCCGGCCGGTTGTCGAATGCGGTGGACTGCTTGCAGTGCTCTGCGATTGCTGCCGGTCGTTGGGGTGGTGATCTCGTACCATGTGC…
Barbeitos et al. 2010, PNAS	EU262802.1	NA	Animalia	Cnidaria	Anthozoa	Scleractinia	Cladocoridae	Cladocora	Cladocora caespitosa	yes	0	NA	yes	0	NA	GAGAGTTAAAAAGTACGTGAAACCGTTGAAAGGGAAACGAATGGACTCAGCAATGCGCCGTTTGAGATTCAGCCGGTGGGCGGGATCGGCGTGGGGTTTGCGGATCTGAATGGACCGCGGCTTCTCGCTCGTTTCTCCTCGCCGTCGCACTTCTCTTGGGCGCGCGTCAACGTCGGTTGGGACTGGGTCTGAAAGGTACCGGGAAGGTAGGTCTGGACCTTCGGGTTGGGACTGTTACAGCCCGGTTCTCTCATGGCTCGGGCCTGACCGAGGAGTCGCAGCGCATGCCTCTTGTGGCTAGGGTGCCGTCCTTCCGGCCGGTTGTCGAACGTGGTGGACTGCTTGCAGTGCTCCGCGACTGCTGCCGGTCGTTGGGGTGGTGATCTCGTACCATGCGCT…
Barbeitos et al. 2010, PNAS	EU262803.1	NA	Animalia	Cnidaria	Anthozoa	Scleractinia	Pocilloporidae	Pocillopora	Pocillopora meandrina	yes	1	27	yes	0	NA	GAGAGTTAAAAAGTACGTGAAACCGTCAGAAGGGAAACGAATGGACTCAGCAATGCTCCCTTCGAGATTCAGCCGGTCGGCCTGCGTGCGGCTCGGGGTTTGCGGATCCGAACGGACCGCGGTCCCGGGCGCGTGCCTCGCCACCGTCGCACTTCTCTTGGGCGCGCGTCAGCGTGGGTCGGAACTGGGCGTCGGAGGTGCCGTGGAAGGTAGGTCTGGAGTCTCGGCTCCGGACTGTTACAGCCCGGCTCCCGCGGCTCGGGTCCGACCGAGGACAGTCGCAGCGCGTGCCTCTTGTGGCTAGGGTCCCGTCCTTCCGGCCGGTCGTCGACCGTGGTGGACTGCTTGCAGTGCTCCGCGACTGCTGCCGGTCGTTGGGGCGGTGTTCTCGTACGACGC…
Barbeitos et al. 2010, PNAS	EU262804.1	NA	Animalia	Cnidaria	Anthozoa	Scleractinia	Faviidae	Pseudodiploria	Pseudodiploria clivosa	no	NA	NA	yes	0	NA	GAGAGTTAAAGAGTACGTGAAACCGTCTAGAGGGAAACGAATGGACTCAGCAATGCGCTCCGGCGAGATTCAGCCGGCGGGCGGCCTCGGTCCTCGGTTCGCGGATCCGAATGGACCGCGGCCTCGGGCTCGCGAGCTCCCGCCGTCGCACTTCTCACGGGCGCGCGTCAACGTCGGTTGGGACTGGGTGTTAAGGGTGCCGGGAAGGTAGGCGCGGAGCCCCTCGGGGATTTCCGCTCTGTTAACGCAGCCCGGCTTCTCGCATGACTCGGGCCCGACCGAGGCGGTTATAGGGCATGCCTCTTGTGGCTAGGGGCCCGTCCTTCCGGCCGGCCGTCCGATGCGGTGGACTGCTTGCAGTGTTCGGCGATGGCTACAGGTCGTTTGGGCGGTGTGTTT…
Barbeitos et al. 2010, PNAS	EU262805.1	NA	Animalia	Cnidaria	Anthozoa	Scleractinia	Astrocoeniidae	Stephanocoenia	Stephanocoenia intersepta	yes	0	NA	yes	0	NA	GAGAGTTAAAAAGTACGTGAAACCGTTGAAAGGGAAACGAATGGACTCAGCAATGCGCCGTTTGAGATTCAGCCGGCTGGTGGGGTCGGCCCGGGGTTTGCGGATCTGAATGGACCGCGGTCTCGGGCTCGTTCTTCCCGGCCGTCGCACTTCTCTTGGGCGCGCGTCAACGTCGGTTGGGACTGGGTCTGAAAGGTGCCGGGAAGGTAGGTCCGTGCGTCCCCTCGGGGTCGTTCGTTCTGTTACAGCCCGGTTCTCTCATGGCTCGGGCCCGACCGAGGCGGTCGCAGCGCATGCCTCTTGTGGCTAGGGTCCCGTCCGTCCGGCCGGCTGTCGAATGCGGTGGACTGCTTGCAGTGCTCCGCGACTGCTGTCGGTCGTTTGGGCGGTGATCTCGTA…
Barbeitos et al. 2010, PNAS	EU262806.1	NA	Animalia	Cnidaria	Anthozoa	Scleractinia	Pocilloporidae	Madracis	Madracis myriaster	yes	1	27	yes	0	NA	GAGAGTTAAAAAGTACGTGAAACCGTCGAAAGGGAAACGAATGGACTCAGCAATGTGCCGTTTGAGATTCAGTCGCGCGGGCGGGTGCGGCTCGGGGTTTGCGGATCTGAATGGACCGCGGTCTCGGGCTCGTTTCCCCCCGCCGGCGCACTTCTCTTGGGCGCGCGTCAACGTCGGTTGGAACTGGGCCTGAAAGGTGCCGGGAAGGTAGGTTCGCACCCTCGGGTGCGGACTGTTACAGCCCGGCTCTTGCGGCTCGGGTCCGACCGTGGCGGTTGCAGTGCATGCCTCTTGTGGCTAGGGTCCCGCCCTTCCGGCCGGTCGTCGAATGCGGTGGACTGCTTGCAGTGCTCCGCGACCGCTGCCGGTCGTTGGGGTGGTGATCTCGTACCATGCACT…
Barbeitos et al. 2010, PNAS	EU262807.1	NA	Animalia	Cnidaria	Anthozoa	Scleractinia	Merulinidae	Mycedium	Mycedium sp.	yes	0	NA	yes	0	NA	GAGAATTAAAAAGTATCTGAAACCGTCAAAAGGGGAGCAAATGGACTCAGCAATGCGCCCTCTGAGATTCAGCCGGTGGATGGCGGCGGCGCTGGGCTTGCGGATCTGAATGGGCCATGGCCCGGCGCCCGCTTCCCCCGCCATCGCACTTCTCTGCGGCGCGTGTCAACGTGCATTGGGACTGGGTCTGAAAGGTGCCGGGAACGTAGGTGTGGGCCCCCGGGTCCGTGCCATTGCAGCCCGGTTCTCGTGGTTCGGCCCCGACTGAGGAGCGACACGCAGGGCATGCCTCTTGTGGCTAGGGTACCGTCCTTCCGGCCGGTTGTCCAGTGCAGTGGACTGCTTGCAGTGCTCTGCGACGGCTACCGGTCGTTGGGGTGGTGATCTCGTACCATGCCC…
Barbeitos et al. 2010, PNAS	EU262808.1	NA	Animalia	Cnidaria	Anthozoa	Scleractinia	Merulinidae	Oulophyllia	Oulophyllia sp.	yes	1	27	yes	0	NA	GAGAGTTAAAAAGTACGTGAAACCGTCGAAAGGGAAACGAATGGACTCAGCAATGCGCCCCCTGAGATTCAGCCGGTGGGTGGCGGCGGCGCTTGGCTTGCGGATCTGAATGGACCGCGGCCTGGCGCCCGCCGTCCCCCGCCGTCGCACTTCTCTGGGGCGCGCGTCAACGTGGGTCGGGACTGGGTCTGAAAGGTGCCGGGAAGGTAGGCGTGGGCCCCCGGGTCCGCGCCGTTACAGCCCGGTTCTCTCATGGCTCGGGCCCGACCGAGGAGCGATGCGGGGCATGCCTCCTGTGGCTAGGGTCCCGCCCTTCCGGCCGGTTGTCCAGTGCGGTGGACTGCTTGCAGTGCTCCGCGACGGCTGCCGGTCGTTGGGGTGGTGATCTCGTACCATGCC…
Barbeitos et al. 2010, PNAS	EU262809.1	NA	Animalia	Cnidaria	Anthozoa	Scleractinia	Faviidae	Mycetophyllia	Mycetophyllia aliciae	yes	0	NA	yes	0	NA	GAGAGTTAAAAAGTACGTGAAACCGTTGAAAGGGAAACGAATGGACTCAGCAATGCGCCCTTTGAGATTCAGCCGGCGGGCGGTCTTGGCCCCGGGTTTGCGGATCTGAATGGACCGCGGCCCTCGGCTCTCGATCTCCCCCGCCGTCGCACTTCTCTGGGACGCGCGTCAACGTCGGTTGGGACTGGGTCTGAAAGGTGCCGGGAAGGTAGGAGCGGGCCTCCGGGCCGGCTCTGTTACAGCCCGGCTCTCCTTCATGGCTCGGGCCCGACCGAGGCGGTTGCAGGGCATGCCTCTTGTGGCTAGGGTGCCGCCCTTCCGGCCGGCTGTTCCAATGCGGTGGACTGCTTGCAGTGCTCGGCGACGGCTGCCGGTCGTTGGGGTGGTGATCTCGTACCA…
Barbeitos et al. 2010, PNAS	EU262810.1	NA	Animalia	Cnidaria	Anthozoa	Scleractinia	Montastraeidae	Montastraea	Montastraea cavernosa	yes	0	NA	yes	0	NA	GAGAGTTAAAAAGTACGTGAAACCGTTGAAAGGGAAACGAATGGACTCAGCAATGCGCCCTTTGAGATTCAGCCGGTGGGTGGGATCGGCCTCGGGTTTGCGGATCTGAATGGACCGCGGCCCGATGCTCGTTTCTCCTGGCCGTCGCACTTCTCTTGGGCGCGCGTCAACGTCGGTTGGGACTGGGTCTGAAAGGTGCCGGGAAGGTAGGTGTGGGCCTTCGGGTCCGTTCTGTTACAGCCCGGTTCTCTCATGGCTCGGACCCGACCGAGGCGTTGCAGGGCATGCCTCTTGTGGCTAGGGTCCCCTCCTTCCGGCCGGCTGTCGAATGTGGTGGACTGCTTGCAGTGCTCGACGAACGCTGCCGGTCGTTGGGGCGGTGATCTCGTACCATGCCCT…
Barbeitos et al. 2010, PNAS	EU262811.1	NA	Animalia	Cnidaria	Anthozoa	Scleractinia	Fungiidae	Herpolitha	Herpolitha sp.	yes	1	27	yes	0	NA	GAGAGTTAAAAAGTACGTGAAACCGTCGAAAGGGAAACGAATGGACTCAGCAATGCGCCGTTTGAGATTCAGCCGGTGGGCGGGATCGGCGCGGGGTTTGCGGATCTGAATGGACCGCGGCTCCGTGCTCGTTTCCCCTCGCCGTCGCACTTCTCTTGGGCGCACGTCAACGTCGGTTGGAACTGGGTTTGAAAGGCGCCGGGAAGGTAGGTCTGGTCCTTCGGGTCCGGACTGTTACAGCCCGGTGTTCTCATGGCTCGGGTCCGACCGAGGAGTCGCAGCGCATGCCTCTTGTGGCTAGGGTCCCGTCCTTCCGGCCGGTTGTCGAATGCGGTGGACTGCTTGCAGTGCTCCGTGACTGCTGCCGGTCGTTGGGGTGGTGATCTCGTACCATGCGCT…
Barbeitos et al. 2010, PNAS	EU262812.1	NA	Animalia	Cnidaria	Anthozoa	Scleractinia	Flabellidae	Rhizotrochus	Rhizotrochus flabelliformis	yes	0	NA	yes	0	NA	GAGAGTTAAAAAGTACGTGAAACCGTTGAAAGGGAAACGAATGGACTCAGCAATGCGCCGCTTGAGATTCAGCCGGCCGGCGGGGTCGGCCCGGGGTTTGCGGATCCGAACGGACCGCGGTCTCGGGCTCGTCCTCGCCGACCGTCGCACTTCTCTTGGGCGCGCGTCAACGTCGGTCGGTTCTGGGTCTGAAGGGTTCCGGGAAGGTGAGTCCGCGCTTCTCTCTCCCCGGGGAGTCGTGCGGTCCGTTACAGCCCGGTTCTCGGATCGGCTCGGAGTCGACCGAGGCGGTCGCAGCGCATGCCTCTCGTGGCTAGGGTCCCGTTCTTCCGGCCGGTCGTCGACCGCGGTGGACTGCTTGCAGTGCTCCGCGACTGCTGCCGGTCGTTGGGGCGGTGA…
Barbeitos et al. 2010, PNAS	EU262813.1	NA	Animalia	Cnidaria	Anthozoa	Scleractinia	Dendrophylliidae	Balanophyllia	Balanophyllia regia	yes	0	NA	yes	0	NA	GAGAGTTAAAAAGTACGTGAAACCGTTGGAAGGGAAACGAATGGACTCAGCAATGCGCCGTTTTGAGATTCAGCCGGTCCGGCGGGATCGGCTCGGGGTGCGCGGATCCGAATGGACCGCCGTCCCGGGCTCGTTTCTCCCGGCCGTCGCACTTCTCTTGGGCGCACGTCAACGTCGGTTGGGACTGGGTCTTAAAGGCTCCGGGAAGGTAGGTCCGCGCGTTCCTCGCGTTCGCGCGCTCTGTTACAGCCCGGTTCTCTTGCGGCTCGGGCCCGAACGAGGCGGTTGCAGCGCATGCCTCTTTTGGCTAGGGTCCCGTCCGTCCGGCCGGTTGTTCGACCGCGGTGGACTGCTTGCAGTGCTCCGCGACTGCTGCCGGTCGTTTGGGCGGTGATCTCG…
Barbeitos et al. 2010, PNAS	EU262814.1	NA	Animalia	Cnidaria	Anthozoa	Scleractinia	Poritidae	Porites	Porites compressa	yes	1	28	yes	0	NA	GAGAGTTAAAAAGTACGTGAAACCGTTTGAAGGGAAACGAATGGACTCAGCAATGCGCCCTTTGAGATTCAGCCGGGCGGTTGTGGCGGTCCGGGGCTTGCGGATCTGAATGGACCGCGGTCTTGGGCTCGTCGCTTCCGACCGTCGCACTTCTCTTGGACGCGAGTCAACGTCGGTTGGGACTGGGCCTCAAAGGTTCCGGGAAGGTAGGTCCGGACGCTTGCGTTCGGACTGTTACAGCCCGGTTCTCTCGCGGCTCGGGCCCGACCGAGGCGGATGCAGCACATGCCTCTTCTGGCTAGGGTCCCGTCCTTCCGGCCGGTTGTCGAATGCGGTGGACTGCTTGCAGTGCTCTGCGACTGCTGCCGGTCGTTGGGATGGTGATCTCGTACCATGTGC…
Barbeitos et al. 2010, PNAS	EU262815.1	NA	Animalia	Cnidaria	Anthozoa	Scleractinia	Meandrinidae	Meandrina	Meandrina meandrites	yes	0	NA	yes	0	NA	GAGAGTTAAAAAGTACGTGAAACCGTTGAAAGGGAAACGAATGGACTCAGCAATGCGCCGTTTGAGATTCAGCCGGTGGGTGGGATCGGCTCGGGGTTTGCGGATCTGAATGGACCGCGGCCTTGGGCTCGTTTGTCCTCGCCGTCGCACTTCTCTTGGGCGCGCGTCAACGTCGGTTGGGACTGGGTCTGAAAGGTGCCGGGAAGGTAGGTCTGGACCCCCGGGTCCGGTCTGTTACAGCCCGGTTCTCTCATGGCTCGGGCCCGACCGAGGAGTGGCAGCGCATGCCTCTTGTGGCTAGGGTGCCGTCCTTCCGGCCGGTTGTCGAATGTGGTGGACTGCTTGCAGTGCTCCGCGACTGCTGCCGGTCGTTGGGGTGGTGATCTCGTACCATGCGCT…
Barbeitos et al. 2010, PNAS	EU262816.1	NA	Animalia	Cnidaria	Anthozoa	Scleractinia	Merulinidae	Mycedium	Mycedium sp.	yes	0	NA	no	NA	NA	GAGAATTAAAAAGTATCTAAAACCGTCAAAAGGGAAGCAAATGGACTCAGCAATGCGCCCTCTGAGATTCAGCCGGTGGATGGCGGCGGCGCTGGGCTTGCGGATCTGAATGGGCCATGGCCCGGCGCCCGCTTCCCCCCGCCATCGCACTTCTCTGCGGCGCGTGTCAACGTGCGTTGGGACTGGGTCTGAAAGGTGCCGGGAACGTAGGTGTGGGCCTCCGGGTCCGTGCCATTGGAGCCCGGTTCTCGTGGTTCGGCCCCGACTGAGGAGCGACACGCAGGGCATGCCTCTTGTGGCTAGGGTACCGTCCTTCCAGCCGGTTGTCCAGTGCAGTGGACTGCTTGCAGTGCTCTGCGACGGCTACCGGTCGTTGGGGTGGTGATCTCGTACCATGCC…
Barbeitos et al. 2010, PNAS	EU262817.1	NA	Animalia	Cnidaria	Anthozoa	Scleractinia	Caryophylliidae	Hoplangia	Hoplangia durotrix	yes	0	NA	yes	0	NA	GAGAGTTAAAAAGTACGTGAAACCGTTGAAAGGGAAACGAATGGACTCAGCAATGCGCCGTTTGAGATTCAGCCGGCGGGCGGGGGCGGCTCGGGGTTTGCGGATCCGAACGGACCGCGGTCTCGGGCTCGCCCCTCCCGGCCGTCGCACTTCTCTTGGGCGCGCGTCAACGTCGGTTGGGACTGTGTCTGAAAGGTTCCGGGAAGGTAGGTCCGTGCGTCCCCTCGGGGTCGCTCGTTCTGTTACGCGGCCCGGTTCTCTCATGGCTCGGGCCCGACCGAGGCGGCTCGCAGCGCGTGCCTCCTGTGGCTAGGGTCCCGTCCGTCCGGCCGGTCGTCGACCGCGGTGGACTGCTTGCAGTGCTCCGCGACTGCTGCCGGTCGTTGGGGCGGTGATCTC…
Barbeitos et al. 2010, PNAS	EU262818.1	NA	Animalia	Cnidaria	Anthozoa	Scleractinia	Pocilloporidae	Madracis	Madracis decactis	yes	1	27	yes	0	NA	GAGAGTTAAAAAGTACGTGAAACCGTCGAAAGGGAAACGAATGGACTCAGCAATGTGCCGTTTGAGATTCAGCCGCGCGGGCGGGTGCGGCTCGGGGTTTGCGGATCTGAATGGACCGCGGTCTCGGGCTCGTCTCCCCCCGCCGGCGCACTTCTCTTGGGCGCGCGTCAACGTCGGTTGGAACTGGGCCTGAAAGGTGCCGGGAAGGTAGGTTCGCACCCTTGGGTGCGGACTGTTACAGCCCGGCTCTTGCGGCTCGGGTCCGACCGTGGCGGTTGCAGTGCATGCCTCTTGTGGCTAGGGTCCCGCCCTTCCGGCCGGTCGTCGAATGCGGTGGACTGCTTGCAGTGCTCCGCGACCGCTGCCGGTCGTTGGGGTGGTGATCTCGTACCATGCACT…
Barbeitos et al. 2010, PNAS	EU262819.1	NA	Animalia	Cnidaria	Anthozoa	Scleractinia	Meandrinidae	Dendrogyra	Dendrogyra cylindrus	yes	0	NA	yes	0	NA	GAGAGTTAAAAAGTACGTGAAACCGTTGAAAGGGAAACGAATGGACTCAGCAATGCGCCGTTTGAGATTCAGCCGGTGGGTGGGATCGGCTCGGGGTTTGCGGATCTGAATGGACCGCGGCCTTGGGCTCGTTTCTCCTCGTCGTCGCACTTCTCTTGGGCGCGCGTCAACGTCGGTTGGGACTGGGTCTGAAAGGTGCCGGGAAGGTAGGTCTGGACCTCCGGGTCCGGTCTGTTACAGCCCGGTTCTCTCATGGCTCGGGCCCGACCGAGGAGTGGCAGCGCATGCCTCTTGTGGCTAGGGTGCCGTCCTTCCGGCCGGTTGTCGAATGCGGTGGACTGCTTGCAGTGCTCCGCGACTGCTGCCGGTCGTTGGGGTGGTGATCTCGTACCATGCGCT…
Barbeitos et al. 2010, PNAS	EU262820.1	NA	Animalia	Cnidaria	Anthozoa	Scleractinia	Caryophylliidae	Paracyathus	Paracyathus pulchellus	yes	0	NA	yes	0	NA	GAGAGTTAAAAAGTACGTGAAACCGTTGAAAGGGAAACGAATGGACTCAGCAATGCGCCGTTTTGAGATTCAGCCGGTGGGCGGGATCGGTGCGGGGTTTGCGGATCTGAATGGACCGCGGCTTTGCGCTCGTTTCTCTTCGCCGTCGCACTTCTCTTGGGCGCGCGTCAACGTCGGTTGGGACTGGGTTTGAAAGGTGCCGGGAAGGTAGGTCTGGACCTTCGGGTTCGGTCTGTTACAGCCCGGTTCTCTCATGGCTCGGGCCTGACCGAGGAGTCGCAGCGCATGCCTCTTGTGGCTAGGGTGCCGTCCTTCCGGCCGGTTGTCGAACGTGGTGGACTGCTTGCAGTGCTCCGCGACTGCTGCCGGTCGTTGGGGTGGTGATCTCGTACCATGCGC…
Barbeitos et al. 2010, PNAS	EU262821.1	NA	Animalia	Cnidaria	Anthozoa	Scleractinia	Poritidae	Porites	Porites astreoides	yes	1	28	yes	0	NA	GAGAGTTAAAAAGTACGTGAAACCGTTTGAAGGGAAACGAATGGACTCAGCAATGCGCCCTTTGAGATTCAGCCGGGCGGTTGTGGCGGTCCGGGGCTTGCGGATCTGAATGGACCGCGGTCTCGGGCCCGTCGCTTCCGACCGTCGCACTTCTCTTGGACGCGAGTCAACGTCGGTTGGGACTGGGCCTCAAAGGTTCCGGGAAGGTAGGTCCGGACGCTCGCGTTCGGACTGTTACAGCCCGGTTCTCTCGCGGCTCGGGCCCGACCGAGGCGGATGCAGCACATGCCTCTTCTGGCTAGGGTCCCGTCCTTCCGGCCGGTTGTCGAATGCGGTGGACTGCTTGCAGTGCTCTGCGACTGCTGCCGGTCGTTGGGGTGGTGATCTCGTACCATGTGC…
Barbeitos et al. 2010, PNAS	EU262822.1	NA	Animalia	Cnidaria	Anthozoa	Scleractinia	Montastraeidae	Montastraea	Montastraea cavernosa	yes	0	NA	yes	0	NA	GAGAGTTAAAAAGTACGTGAAACCGTTGAAAGGGAAACGAATGGACTCAGCAATGCGCCCTTTGAGATTCAGCCGGTGGGTGGGATCGGCCTCGGGTTTGCGGATCTGAATGGACCGCGGCCCGGTGCTCGTTTCTCCTGGCCGTCGCACTTCTCTTGGGCGCGCGTCAACGTCGGTTGGGACTGGGTCTGAAAGGTGCCGGGAAGGTAGGTGTGGGCCTTCGGGTCCGTTCTGTTACAGCCCGGTTCTCTCATGGCTCGGGCCCGACCGAGGCGTTGCAGGGCATGCCTCTTGTGGCTAGGGTCCCCTCCTTCCGGCCGGCTGTCGAATGTGGTGGACTGCTTGCAGTGCTCGACGAACGCTGCCGGTCGTTGGGGCGGTGATCTCGTACCATGCCCT…
Barbeitos et al. 2010, PNAS	EU262823.1	NA	Animalia	Cnidaria	Anthozoa	Scleractinia	Agariciidae	Agaricia	Agaricia grahamae	yes	0	NA	yes	0	NA	GAGAGTTAAAAAGTACGTGAAACCGTTGGAAGGGAAACGAATGGACTCAGCAATGCGCCGTTTGAGATTCAGCCGGCGGGTGACGTCGGCCCGGGGTTTGCGGATCTGAATGGACCGCGGTCCCGGGCCCGGTGCTCCCGGTCGTCGCACTTCTCTTGGGCGCGCGTCAACGTCGGTTGGGACTGGGTCTGAAAGGTGCCGGGAAGGTAGGTCTGTGCGTTCCCCTCTTCGGGGGGGGTCGTTCGGTCTGTTAGAGCCCGGTTCTCCTCGCGGCTCGGGCCCGACCGAGGCGGTTGCAGCGCATGCCTCTCGCAAGGCTAGGGTCCCGTCCCTCCGGCCGGTTGTCGAATGCGGTGGACTGCTTGCAGTGCTCCGCGAATGCTGCCGGTCGTTGGGGTG…
Barbeitos et al. 2010, PNAS	EU262824.1	NA	Animalia	Cnidaria	Anthozoa	Scleractinia	Caryophylliidae	Hoplangia	Hoplangia durotrix	yes	0	NA	yes	0	NA	GAGAGTTAAAAAGTACGTGAAACCGTTGAAAGGGAAACGAATGGACTCAGCAATGCGCCGTTTGAGATTCAGCCGGCGGGCGGGGGCGGCTCGGGGTTTGCGGATCCGAACGGACCGCGGTCTCGGGCTCGCCCCTCCCGGCCGTCGCACTTCTCTTGGGCGCGCGTCAACGTCGGTTGGGACTGTGTCTGAAAGGTTCCGGGAAGGTAGGTCCGTGCGTCCCCTCGGGGTCGCTCGTTCTGTTACGCGGCCCGGTTCTCTCATGGCTCGGGCCCGACCGAGGCGGCTCGCAGCGCGTGCCTCCTGTGGCTAGGGTCCCGTCCGTCCGGCCGGTCGTCGACCGCGGTGGACTGCTTGCAGTGCTCCGCGACTGCTGCCGGTCGTTGGGGCGGTGATCTC…
Barbeitos et al. 2010, PNAS	EU262825.1	NA	Animalia	Cnidaria	Anthozoa	Scleractinia	Lobophylliidae	Cynarina	Cynarina lacrymalis	yes	0	NA	yes	0	NA	GAGAGTTAAAAAGTACGTGAAACCGTTGAAAGGGAAACGAATGGACTCAGCAATGCGCCGTTTGAGATTCAGCCGGTGGGCGGCGTCGGCGCGGGGTTTGCGGATCTGAATGGACCGCGGCCCGGCGCTCGTGGCCTCCCGCCGTCGCACTTCTCTTGGGCGCGCGTCAACGTCGGTTGGGACTGGGTCTGAAAGGTGCCGGGAAGGTAGGTGTGGGCCCTCGGGCCCGTTCTGTTACAGCCCGGTTCTCTCGTGGCTCGGGCCCGACCGAGGTGTTGCAGGGCATGCCTCTTGTGGCTAGGGTCCCGTCCTTCCGGCCGGCTGTCGACTGCGGTGGACTGCTTGCAGTGCTCGGCGAACGCTGCCGGTCGTTGGGGTGGTGATCTCGTACCATGCCCT…
Barbeitos et al. 2010, PNAS	EU262826.1	NA	Animalia	Cnidaria	Anthozoa	Scleractinia	Coscinaraeidae	Coscinaraea	Coscinaraea sp.	yes	1	27	yes	0	NA	GAGAGTTAAAAAGTACGTGAAACCGTCGAAAGGGAAACGAATGGACTCAGCAATGCGCCGTTTGAGATTCAGCCGGTGGGCGGGATCGGCGCGGGGTTTGCGGATCTGAATGGACCGCGGCTCCGTGCTCGTTTTCCCTCGCCGTCGCACTTCTCTTGGGCGCACGTCAACGTCGGTTGGAACTGGGTTTGAAAGGCGCCGGGAAGGTAGGTCTGGTCCTTTGGGTCCGGTCTGTTACAGCCCGGTGTTCTCATGGCTCGGGTCCGACCGAGGAGTCGCAGCGCATGCCTCTTGTGGCTAGGGTCCCGTCCTTCCGGCCGGTTGTCGAATGCGGTGGACTGCTTGCAGTGCTCCGTGACCGCTGCCGGTCGTTGGGGTGGTGATCTCGTACCATGCGCT…
Barbeitos et al. 2010, PNAS	EU262827.1	NA	Animalia	Cnidaria	Anthozoa	Scleractinia	Agariciidae	Agaricia	Agaricia tenuifolia	yes	0	NA	yes	0	NA	GAGAGTTAAAAAGTACGTGAAACCGTTGGAAGGGAAACGAATGGACTCAGCAATGCGCCGTTTGAGATTCAGCCGGCGGGTAGCGTCGGCCCGGGGTTTGCGGATCTGAATGGACCGCGGTCCCGGGCCCGGTGCTCCCGGTCGTCGCACTTCTCTTGGGCGCGCGTCAACGTCGGTTGGGACTGGGTCTAAAAGGTGCCGAGAAGGTAGGTCTGTGCGTTCCCCTCGGGGTCGCCCGGTCTGTTACAGCTCGGTTCTCTTCGCGGCTCGGGCCCGTCCGAGGCGGTTGCAGCGCATGCCTCTCGTAAGGCTAGGGTCCCGTCCCTCCGGCCGGTTGTCGAATGCGGTGGACTGCGTGCAGTGCTCCGCGAATGCTGCCGGTCGTTGGGGTGGTGATCT…
Barbeitos et al. 2010, PNAS	EU262828.1	NA	Animalia	Cnidaria	Anthozoa	Actiniaria	Edwardsiidae	Nematostella	Nematostella vectensis	yes	0	NA	yes	2	46, 48	GAGAGTTAAAAAGTACGTGAAACCGTTAAAAGGGAAACGAATGGGGTTAGCAATGCGTCGTGCGAGATTCAGCCGGTGGGTGGGCCAGGCGGGCGGTTGGCGGATCTGAATGGACCGCTGCCGTTCGGGTTGGTTTCCCGACCGTCGCACTTCTCGCAGGCGCGCGCCAACGTCGGTTAGGGCTGGGTCTCAAAGGCGGTGGGAAGGTAGGTTTGGACTCTCGGGCCCGAACTGTTACAGTCCTCCGTTTGTCATGGCCCGGACCTGACCGAGGAGCTTGCGGTGCATGCCGTTCGGCTAGGGTCCCGTCTTCCCGGTCGGTCGTCGAATGCGGTGGACTGCGTGCAGTGCGCCGCGACTGCTGCCGGTCGCGAGGGCGGTGATTTCGTACTATGCACC…
Barbeitos et al. 2010, PNAS	EU262829.1	NA	Animalia	Cnidaria	Anthozoa	Corallimorpharia	Discosomidae	Rhodactis	Rhodactis sp.	yes	1	27	yes	2	46, 48	GAGAGTTAAAAAGTACGTGAAACCGTCGAAAGGGAAACGAATGGAGTTAGCAATGCGCCCCTCGAGATTCAGCCGGCGGGCTCGGTTCCCCGCCGTCGCACTTCTCTTGGGCGCGCGTCAGCGTGGGTTGGTCTCCGGGCTTGAAAGGTGCGGGCAAGGTGGGTGCGGGGGTCTCCGGGCCCTCGTTCTGTTACAGGCCCGCTCTCTCTGGTGGCTCGGGGCCGACCGAGGTGGTCGCAGCGCATGCCTCTTGTGGCTAGGGTCCCGCCCTTCCGGCTGGCGTTTTTCGACTGCGGTGGACTGCTTGCAGTGCTCCGCGACCGGCGCCGGCCGTTGGGGTGGTGATCTCGTACCATGCGCTTAGGATGCTGGCGGTCATATGGCTCCATCCGACCCGTC…
Barbeitos et al. 2010, PNAS	EU262830.1	NA	Animalia	Cnidaria	Anthozoa	Scleractinia	Poritidae	Porites	Porites astreoides	yes	1	28	yes	0	NA	GAGAGTTAAAAAGTACGTGAAACCGTTTGAAGGGAAACGAATGGACTCAGCAATGCGCCCTTTGAGATTCAGCCGGGCGGTTGTGGCGGTCCGGGGCTTGCGGATCTGAATGGACCGCGGTCTCGGGCCCGTCGCTTCCGACCGTCGCACTTCTCTTGGACGCGAGTCAACGTCGGTTGGGACTGGGCCTCAAAGGTTCCGGGAAGGTAGGTCCGGACGCTCGCGTTCGGACTGTTACAGCCCGGTTCTCTCGCGGCTCGGGCCCGACCGAGGCGGATGCAGCACATGCCTCTTCTGGCTAGGGTCCCGTCCTTCCGGCCGGTTGTCGAATGCGGTGGACTGCTTGCAGTGCTCTGCGACTGCTGCCGGTCGTTGGGGTGGTGATCTCGTACCATGTGC…
Barbeitos et al. 2010, PNAS	EU262831.1	NA	Animalia	Cnidaria	Anthozoa	Scleractinia	Poritidae	Porites	Porites porites	yes	1	28	yes	0	NA	GAGAGTTAAAAAGTACGTGAAACCGTTTGAAGGGAAACGAATGGACTCAGCAATGCGCCCTTTGAGATTCAGCCGGGCGGTTGTGGCGGTGCGGGGCTTGCGGATCTGAATGGACCGCGGTCTCGGGCCCGTTGCTTCCGACCGTCGCACTTCTCTTGGACGCGAGTCAACGTCGGTTGGGACTGGGCCTCAAAGGTTCCGGGAAGGTAGGTCGGGACGCTCGCGTTCGGACTGTTACAGCCCGGTTCTCTCCCGGCTCGGGCCCGACCGAGGCGGATGCAGCACATGCCTCTTCTGGCTAGGGTCCCGTCCTTCCGGCCGGTTGTCGAATGCGGTGGACTGCTTGCAGTGCTCTGCGATTGCTGCCGGTCGTTGGGGTGGTGATCTCGTACCATGTGC…
Barbeitos et al. 2010, PNAS	EU262832.1	NA	Animalia	Cnidaria	Anthozoa	Corallimorpharia	Ricordeidae	Ricordea	Ricordea florida	yes	1	27	no	NA	NA	GAGAGTTAAAAAGTACGTGAAACCGTCGAAAGGGAAACGAATGGAACTAGCAATGCGCCCGGCGAGATTCAGCCGGCCGGTCTCGGGCGTGGCGGAGGTTGGCGGATTCGAATGGACCGCTGCCTCGGGCGACTCGTGTTCCGGACGTCGCACTTCTCTCGGGCGCGCGTCAACGTGGGTCGGTCGTGGGTTTGAAAGGTTCCGGTAAGGTAGGCGCGGGCTTTCTCCTTTCTCGGAGGGGGATGGCACCGTTTCTTTAGAGACCGGTTCGCTTCTCGGCCCGCGGTCGACCGAGGTGGTGGCAGCGCATGCCTCTTCGTGCTGGCTAGGGTCCCGCCCCTCCGGTCGGTGCGAGACGCGGTGGACTGCTCGCAGTGCTCCGCGACCCGCGCCGGTCGT…
Barbeitos et al. 2010, PNAS	EU262833.1	NA	Animalia	Cnidaria	Anthozoa	Scleractinia	Lobophylliidae	Lobophyllia	Lobophyllia hemprichii	yes	0	NA	yes	0	NA	GAGAGTTAAAAAGTACGTGAAACCGTTGAAAGGGAAACGAATGGACTCAGCAATGCGCCGTTTGAGATTCAGCCGGTGGGCGGCCTCGGCGCGGGGTTTGCGGATCTGAATGGACCGCGGCCCGGCGCTCGCGGCCTCCCGCCGTCGCACTTCTCTTGGGCGCGCGTCAACGTCGGTTGGGACTGGGTCTGAAAGGTGCCGGGAAGGTAGGTGTGGGCCCTCGGGTCCGTTCTGTTACAGCCCGGCTCTCTCCTGGCTCGGGCCCGACCGAGGCGTTGCAGGGCATGCCTCTTGTGGCTAGGGTCCCGTCCTTCCGGCCGGCTGTCGACTGCGGTGGACTGCTTGCAGTGCTCGGCGAACGCTGCCGGTCGTTGGGGTGGTGATCTCGTACCATGCCCT…
Barbeitos et al. 2010, PNAS	EU262834.1	NA	Animalia	Cnidaria	Anthozoa	Scleractinia	Plesiastreidae	Plesiastrea	Plesiastrea sp.	yes	0	NA	yes	0	NA	GAGAGTTAAAAAGTACGTGAAACCGTTGAAAGGGAAACGAATGGACTCAGCAATGCGCCGTTTGAGATTCAGCCGGTGGGTGGGATCGGCGCGGGGTTTGCGGATCTGAATGGACCGCGGCCTCGAGCTCGTTTCTCCCCGCCGTCGCACTTCTCTTGGGCGCGCGTCAACGTCGGTTGGGACTGGGTCTGAAAGGTGCCGGGAAGGTAGGTCTGGACCTTCGGGTCCGTTCTGTTACAGCCCGGTTCTCTCATGGCTCGGGCCCGACCGAGGAGCTGCAGCGCATGCCTCTTGTGGCTAGGGTCCCGTCCTTCCGGCCGGTTGTCGAATGTGGTGGACTGCTTGCAGTGCTCCGCGACTGCTGCCGGTCGTTGGGGTGGTGATCTCGTACCATGCGCT…
Barbeitos et al. 2010, PNAS	EU262835.1	NA	Animalia	Cnidaria	Anthozoa	Scleractinia	Pachyseridae	Pachyseris	Pachyseris sp.	yes	0	NA	yes	0	NA	GAGAGTTAAAAAGTACGTGAAACCGTTGGAAGGGAAACGAATGGACTCAGCAATGCGCCGTTTGAGATTCAGCCGGCCGGTCTGGGCGGCCCGGGGTTTGCGGATTCGAATGGACCGCGGTCTCGGGCCCGGCTGTTCCGGCCGTCGCACTTCTCTTGGGCGCGCGTCAACGTCGGTTGGGACTGGGTCTGAAAGGTGCCGGGAAGGTGAGCCCCATCGTCCCCTCGGGGTCGTCGGGGCTGTTATAGCCCGGCTCTCTCTTGGCTCGGGCTCGACCGAGGTGGCTTGCAGGGCATGCCTCTTGTGGCTAGGGTCCCGTCCTTCCGGCCGGTTGTCGAATGCGGTGGACTGCTTGCAGTGCTCTGCGACCGCTGCCGGTCGTTGGGGTGGTGATCTCGT…
Barbeitos et al. 2010, PNAS	EU262836.1	NA	Animalia	Cnidaria	Anthozoa	Corallimorpharia	Corallimorpharidae	Corynactis	Corynactis viridis	yes	1	27	yes	2	46, 48	GAGAGTTAAAAAGTACGTGAAACCGTCGGAAGGGAAACGAATGGAGTTAGCAATGTGCCCCTTGAGATTCAGCCGGTGCCGGCGTAGGCGCGGCATTTGCGGATCCGAACGGACCGCGGTGTTGCGGGCTTCGCTTCTCACCGTCGCACTTCTCTTGGGCGCGCGTCAACATCGGTTGGTTTTGCACCTGGGTTTGAAAGGTGCCGGGAAGGTAGGTGCGGCCTTCCTTCGGGAAGTTTCGCACTGTTACAGCCCGGTTCTCTCATGGCTCGGGACCGACCGAGGAGGAAGCTTTTATCGGCTATGCAGCGCATGCCTCTTGTGGCTGGGGTCCCGTCGTTCCGGCCGGTCGTCGACCGTGGTGGACTGCTTGCAGTGCTCCGCGACCGCTGCCGGTTG…
Barbeitos et al. 2010, PNAS	EU262837.1	NA	Animalia	Cnidaria	Anthozoa	Scleractinia	Pocilloporidae	Madracis	Madracis senaria	yes	1	27	yes	0	NA	GAGAGTTAAAAAGTACGTGAAACCGTCGAAAGGGAAACGAATGGACTCAGCAATGTGCCGTTTGAGATTCAGCCGCGTGGGCGGGTGCGGCTCGGGGTTTGCGGATCTGAATGGACCGCGGTCTCGGGCTCGTCTCCCCCCGCCGGCGCACTTCTCTTGGGCGCGCGTCAACGTCGGTTGGAACTGGGCCTGAAAGGTGCCGGGAAGGTAGGTTCGCACCTCCGGGTGCGGACTGTTACAGCCCGGCTCTTGCGGCTCGGGTCCGACCGTGGCGGTTGCAGTGCATGCCTCTTGTGGCTAGGGTCCCGCCCTTCCGGCCGGTCGTCGAATGCGGTGGACTGCTTGCAGTGCTCCGCGACCGCTGCCGGTCGTTGGGGTGGTGATCTCGTACCATGCACT…
Barbeitos et al. 2010, PNAS	EU262838.1	NA	Animalia	Cnidaria	Anthozoa	Scleractinia	Faviidae	Mycetophyllia	Mycetophyllia sp.	no	NA	NA	yes	0	NA	GAGAGTTAAAGAGTACGTGAAACCGTCTAGAGGGAAACGAATGGACTCAGCAATGCGCTCCGTCGAGATTCAGCCGGCGGGCGACCTCGGTCCTTGGTTCGCGGATCCGAATGGACCGCGGCCTCGGGCTCGCGAGCTCCCGCCGTCGCACTTCTCACGGGCGCGCGTCAACGTCGGTTGGGACTGGGTGTTAAGGGTGCCGGGAAGGTAGGCGCGGAGCCCCTCGGGGATTTCCGCTCTGTTAACGTAGCCCGGCTTCTCGCATGACTCGGGCCCGACCGAGGCGGTTATAGGGCATGCCTCTTGTGGCTAGGGGCCCGTCCTTCCGGCCGGCCGTCCGATGCGGTGGACTGCTTGCAGTGTTCGGCGATGGCTACCGGTCGTTTGGGCGGTGTTTTT…
Barbeitos et al. 2010, PNAS	EU262839.1	NA	Animalia	Cnidaria	Anthozoa	Scleractinia	Merulinidae	Goniastrea	Goniastrea retiformis	yes	1	27	yes	0	NA	GAGAGTTAAAAAGTACGTGAAACCGTCGAAAGGGAAACGAATGGACTCAGCAATGCGCCCTCTGAGATTCAGCCGGTGGGTGGCGTCGGCGCTGGGTTTGCGGATCTGAATGGACCGCGGCCTGGCGCTCGGTGTCCCCCGCCGTCGCACTTCTCTGGGGCGCGCGTCAACGTGGGTTGGGACTGGGTCTGAAAGGTGCCGGGAAGGTAGGTGTGGGCCTTCGGGTCCGTTCTGTTACAGCCCGGCTCTCTCATGGCTCGGGCCCGACCGAGGAGTGAGACAGGGCATGCCTCCTGTGGCTAGGGTCCCGTCCTTCCGGCCGGCTGTCCAGTGTGGTGGACTGCTTGCAGTGCTCCGCGACGGCTGCCGGTCGTTGGGGTGGTGATCTCGTACCATGCC…
Barbeitos et al. 2010, PNAS	EU262840.1	NA	Animalia	Cnidaria	Anthozoa	Scleractinia	Pocilloporidae	Madracis	Madracis decactis	yes	1	27	yes	0	NA	GAGAGTTAAAAAGTACGTGAAACCGTCGAAAGGGAAACGAATGGACTCAGCAATGTGCCGTTTGAGATTCAGCCGCGCGGGCGGGTGCGGCTCGGGGTTTGCGGATCTGAATGGACCGCGGTCTCGGGCTCGTCTCCCCCCGCCGGCGCACTTCTCTTGGGCGCGCGTCAACGTCGGTTGGAACTGGGCCTGAAAGGTGCCGGGAAGGTAGGTTCGCACCCTCGGGTGCGGACTGTTACAGCCCGGCTCTTGCGGCTCGGGTCCGACCGTGGCGGTTGCAGTGCATGCCTCTTGTGGCTAGGGTCCCGCCCTTCCGGCCGGTCGTCGAATGCGGTGGACTGCTTGCAGTGCTCCGCGACCGCTGCCGGTCGTTGGGGTGGTGATCTCGTACCATGCACT…
Barbeitos et al. 2010, PNAS	EU262840.1	NA	Animalia	Cnidaria	Anthozoa	Scleractinia	Pocilloporidae	Madracis	Madracis pharensis	yes	1	27	yes	0	NA	GAGAGTTAAAAAGTACGTGAAACCGTCGAAAGGGAAACGAATGGACTCAGCAATGTGCCGTTTGAGATTCAGCCGCGCGGGCGGGTGCGGCTCGGGGTTTGCGGATCTGAATGGACCGCGGTCTCGGGCTCGTCTCCCCCCGCCGGCGCACTTCTCTTGGGCGCGCGTCAACGTCGGTTGGAACTGGGCCTGAAAGGTGCCGGGAAGGTAGGTTCGCACCCTCGGGTGCGGACTGTTACAGCCCGGCTCTTGCGGCTCGGGTCCGACCGTGGCGGTTGCAGTGCATGCCTCTTGTGGCTAGGGTCCCGCCCTTCCGGCCGGTCGTCGAATGCGGTGGACTGCTTGCAGTGCTCCGCGACCGCTGCCGGTCGTTGGGGTGGTGATCTCGTACCATGCACT…
Barbeitos et al. 2010, PNAS	EU262841.1	NA	Animalia	Cnidaria	Anthozoa	Scleractinia	Flabellidae	Placotrochus	Placotrochus sp.	yes	0	NA	yes	0	NA	GAGAGTTAAAGAGTACGTGAAACCGTTGGAAGGGAAACGAATGGACTCAGCAATGCGCCGTTTGAGATTCAGCCGGCCGGAGGGGTCGGCCCGGGGTTTGCGGATCCGAACGGACCGCGGCGTCGGGCCCGTCCTCGCCGACCGTCGCACTTCTCTTGGGCGCGCGTCAACGTCGGTCGCCCCTGGGTCTGAAGGGTTCCGGGAAGGTGAGTACGCCCGTCCTCCGCGGCGGGCGTTCCGTTTACAGCCCGGTTCTCGGATCGGCTCGGGATCGACCGAGGCTTGTCAGGACGCAGCGCATGCCTCTCTTGGCTGGGGTCCCGTCCTTCCGGCCGGTCGTCGACTGCGGTGGACTGCTTGCAGTGCTCCGCGACCGCTGCCGGTCGTTGGGGCGGTGAC…
Barbeitos et al. 2010, PNAS	EU262842.1	NA	Animalia	Cnidaria	Anthozoa	Scleractinia	Oculinidae	Oculina	Oculina patagonica	yes	0	NA	yes	0	NA	GAGAGTTAAAAAGTACGTGAAACCGTTGAAAGGGAAACGAATGGACTCAGCAATGCGCCGTTTGAGATTCAGCCGGTGGGCGGGATCGGCGTTGGGTTTGCGGATCTGAATGGACCGCGGCCTGGCGCTCGTTTCTGCTCGCCGTCGCACTTCTCTTGGGCGCGCGTCAACGTCGGTTGGGACTGGGTTTGAAAGGTGCCGGGAAGGTAGGTCTGGACCTTCGGGTTCGGTCTGTTACAGCCCGGTTCTCTCATGGCTCGGGCCCGACCGAGGAGTCGCAGCGCATGCCTCTTGTGGCTAGGGTGCCGTCCTTCCGGCCGGTTGTCGAACGTGGTGGACTGCTTGCAGTGCTCCGCGACTGCTGCCGGTCGTTGGGGTGGTGATCTCGTACCATGCGCT…
Barbeitos et al. 2010, PNAS	EU262843.1	NA	Animalia	Cnidaria	Anthozoa	Corallimorpharia	Discosomidae	Discosoma	Discosoma sp.	yes	2	28, 27	yes	1	46	GAGAGTTAAAAAGTACGTGAAACCGTCCGAAGGGAAACGAATGGAGTCAGCAATGCGCCCTCGTGCTGAGATTCAGCCGGCGGGAGGCCGAGGCGTCGGGTTGGACTGCCGCCGCTAGCGGATCCGCAAGGACCGCGGCCCGGCGCGCTCGGAAGGAACTCTTCCCGCCGTCGCACTTCTCTTGGGCGCGCGTCAGCGTGGGTTGGCACCGGGCTTGAAAGCTGCCGGCAAGGTAGGACGCGGAGGCTGCCTCCGACCGTCCCTTGGCTGGACGGCGGCATCGGGCTTTCCAAGGCCTCCGCACCGTTTACAGGCCGGCTCCATCTTGGCCCCCGAACCCTTTTCCCGCCGGACTGGGGGGGCGGGGGCGAGTTTCTGTGGCCCGGGGCCGACCGTGGT…
Barbeitos et al. 2010, PNAS	EU262844.1	NA	Animalia	Cnidaria	Anthozoa	Scleractinia	Pocilloporidae	Madracis	Madracis carmabi	yes	1	27	yes	0	NA	GAGAGTTAAAAAGTACGTGAAACCGTCGAAAGGGAAACGAATGGACTCAGCAATGTGCCGTTTGAGATTCAGCCGCGCGGGCGGGTGCGGCTCGGGGTTTGCGGATCTGAATGGACCGCGGTCTCGGGCTCGTTTCCCCCCGCCGGCGCACTTCTCTTGGGCGCGCGTCAACGTCGGTTGGAACTGGGCCTGAAAGGTGCCGGGAAGGTAGGTTCGCACCCTCGGGTGCGGACTGTTACAGCCCGGCTCTTGCGGCTCGGGTCCGACCGTGGCGGTTGCAGTGCATGCCTCTTGTGGCTAGGGTCCCGCCCTTCCGGCCGGTCGTCGAATGCGGTGGACTGCTTGCAGTGCTCCGCGACCGCTGCCGGTCGTTGGGGTGGTGATCTCGTACCATGCACT…
Barbeitos et al. 2010, PNAS	EU262845.1	NA	Animalia	Cnidaria	Anthozoa	Scleractinia	Pocilloporidae	Madracis	Madracis myriaster	yes	1	27	yes	0	NA	GAGAGTTAAAAAGTACGTGAAACCGTCGAAAGGGAAACGAATGGACTCAGCAATGTGCCGTTTGAGATTCAGTCGCGCGGGCGGGTGCGGCTCGGGGTTTGCGGATCTGAATGGACCGCGGTCTCGGGCTCGTTTCCCCCCGCCGGCGCACTTCTCTTGGGCGCGCGTCAACGTCGGTTGGAACTGGGCCTGAAAGGTGCCGGGAAGGTAGGTTCGCACCCTCGGGTGCGGACTGTTACAGCCCGGCTCTTGCGGCTCGGGTCCGACCGTGGCGGTTGCAGTGCATGCCTCTTGTGGCTAGGGTCCCGCCCTTCCGGCCGGTCGTCGAATGCGGTGGACTGCTTGCAGTGCTCCGCGACCGCTGCCGGTCGTTGGGGTGGTGATCTCGTACCATGCACT…
Barbeitos et al. 2010, PNAS	EU262846.1	NA	Animalia	Cnidaria	Anthozoa	Scleractinia	Flabellidae	Flabellum	Flabellum impensum	yes	0	NA	yes	0	NA	GAGAGTTAAAAAGTACGTGAAACCGTTGAAAGGGAAACGAATGGACTCAGCAATGCGCCGTTTGAGATTCAGCCGGTGGTCGGGATCGGTGCGGGGTTTGCGGATCTGAATGGACCGCGGCCTTGCGCTCGTTTCTCCTCGCCGTCGCACTTCTCTTGGGCGCGCGTCAACGTCGGTTGGGACTGGGTTTGAAAGGTGCCGGGAAGGTAGGTCTGGACCTTCGGGTTCGGTCTGTTACAGCCCGGTTCTCTCATGGCTCGGGCCTGACCGAGGAGTCGCAGCGCATGCCTCTTGTGGCTAGGGTGCCGTCCTTCCGGCCGGTTGTCGAACGTGGTGGACTGCTCGCAGTGCTCCGCGACTGCTGCCGGTCGTTGGGGTGGTGATCTCGCACCATGCGCT…
Barbeitos et al. 2010, PNAS	EU262847.1	NA	Animalia	Cnidaria	Anthozoa	Scleractinia	Agariciidae	Pavona	Pavona varians	yes	0	NA	yes	0	NA	GAGAGTTAAAAAGTACGTGAAACCGTTGGAAGGGAAACGAATGGACTCAGCAATGCGCCGTTTGAGATTCAGCCGGCGGGTGGTGCCGGCCCGGGGTTTGCGGATCTGAATGGACCGCGGTCCCGGGCTCGGAGCTCCCGGTCGTCGCACTTCTCTTGGGCGCGCGTCAACGTCGGTTGGGACTGGGTCTGAAAGGTGCCGGGAAGGTAGGTCTGTGCGTCCTTCGGGGTCGCTCGGTCTGTTACAGCCCGGTTCTCCTCGCGGCTCGGGCCCGACCGAGGCGGTGCAGCGCATGCCTCTCGTAAGGCTAGGGTCCCGTCCCTCCGGCCGGTTGTCGAATGTGGTGGACTGCTTGCAGTGCTCCGCGAATGCTGCCGGTCGTTGGGGTGGTGATCTCGT…
Barbeitos et al. 2010, PNAS	EU262848.1	NA	Animalia	Cnidaria	Anthozoa	Scleractinia	Rhizangiidae	Siderastrea	Siderastrea radians	yes	0	NA	yes	0	NA	GAGAGTTAAAAAGTACGTGAAACCGTTGGAAGGGAAACGAATGGACTCAGCAATGCGCCGTTTGAGATTCAGCCGGCCGGCGGGATCGGCTCGGGGTTTGCGGATCTGAATAGACCGCGGCCACGGGTTCGTTTCTCCTGGCCGTCGCACTTCTCTTGGGCGCGAGTCAACGTCGGTTGGGACTGGGTCTGAAAGGTGCCGGGAAGGTAAGTCCGTGCGTCTCCTCGGGGGCGTTCGGTCGGTTACAGCCCGGTTCTCTCATGGCTCGGGCCCGACCGTGGCGTTGCAGCGCATGCCTCTTGTGGCTAGGGTCCCATCCGTCCGGCCGGTTGTCGAATGTGGTGGACTGCTTGCAGTGCTCCGCGACTGCTGCCGGTCGTTCGGGTGGTGATCTCGTAC…
Barbeitos et al. 2010, PNAS	EU262849.1	NA	Animalia	Cnidaria	Anthozoa	Scleractinia	Merulinidae	Orbicella	Orbicella franksi	yes	1	32	yes	0	NA	GAGAGTTAAAAAGTACGTGAAACCGTTGAAATGGAAACGAATGGGCTCAGCAATGCGCCGTTTGAGATTCAGCCGGTGGGTGGGATCGACGGCGGGTTTGCGGATCTGAATGGACCGCGGCCCGGTGCTCGTTTCTCCCCACCGTCGCACTTCTCTTGGGCGCGCGTCAACGTCGGTTGGGACTGGGTCTGAAAGGTGCCGGGAAGGTAGGTGTGGCCCTCCGGGTCCGTGCTGTTACAGCCCGGTTCTCTCATGGCTCGGGCCCGACCGAGGAGTTGCAGGGCATGCCTCCTGTGGCTAGGGTCCCCTCCCTCCGGCCGGCTGTCCAATGCGGTGGACTGCTTGCAGTGCTCGGCGAACGCTGCCGGTCGTTGGGGTGGTGATCTCGTACCATGCCCT…
Barbeitos et al. 2010, PNAS	EU262850.1	NA	Animalia	Cnidaria	Anthozoa	Scleractinia	Fungiidae	Lobactis	Lobactis scutaria	yes	1	27	yes	0	NA	GAGAGTTAAAAAGTACGTGAAACCGTCGAAAGGGAAACGAATGGACTCAGCAATGCGCCGTTTGAGATTCAGCCGGTGGGCGGGATCGGCGCGGGGTTTGCGGATCTGAATGGACCGCGGCTCCGTGCTCGTTTTCCCTCGCCGTCGCACTTCTCTTGGGCGCACGTCAACGTCGGTTGGAACTGGGTTTGAAAGGCGCCGGGAAGGTAGGTCTGGTCCTTCGGGTCCGGTCTGTTACAGCCCGGTGTTCTCATGGCTCGGGTCCGACCGAGGAGTCGCAGCGCATGCCTCTTGTGGCTAGGGTCCCGTCCTTCCGGCCGGTTGTCGAATGCGGTGGACTGCTTGCAGTGCTCCGTGACTGCTGCCGGTCGTTGGGGTGGTGATCTCGTACCATGCGCT…
Barbeitos et al. 2010, PNAS	EU262851.1	NA	Animalia	Cnidaria	Anthozoa	Scleractinia	Dendrophylliidae	Leptopsammia	Leptopsammia pruvoti	yes	0	NA	yes	0	NA	GAGAGTTAAAAAGTACGTGAAACCGTTGGAAGGGAAACGAATGGACTCAGCAATGCGCCGTTTTGAGATTCAGCCGGCCGGCGGGATCGGCTCGGGGTGTGCGGATCTGAATAGACCGCTATCTCGGGCTCGTTTCTCTCGGCCGTCGCACTTCTCTTGGGCGCACGTCAACGTCGGTTGGGACTGGGTCTGAAAGGTTCCGGGAAGGTAGGTCCGCGCGTTCCTTCGCGTTCGCGCGTTCTGTTACAGCCCGGTTCTCTTGCGGCTCGGGCCCGACCGAGGCGGTTGCAGCGCATGCCTCTTTTGGCTAGGGTCCCGTCCGTCCGGCCGGTCGTCGACCGCGGTGGACTGCTTGCAGTGCTCCGCGACTGCTGCCGGTCGTTTGGGTGGTGATCTCGT…
Barbeitos et al. 2010, PNAS	EU262852.1	NA	Animalia	Cnidaria	Anthozoa	Scleractinia	Anthemiphylliidae	Anthemiphyllia	Anthemiphyllia spinifera	yes	0	NA	yes	0	NA	GAGAGTTAAAAAGTACGTGAAACCGTTGAAAGGGAAACGAATGGACTCAGCAATGCGCCGTTTGAGATTCAGCCGGTCGGCGGGATCGGCTCGGGGTTTGCGGATCTGAATGGACCGCGGTCCTGGGCTCGTTTCTCCCGGCCGTCGCACTTCTCTTGGGCGCGCGTCAACGTCGGTTGGGACTGGGTGTGAAAGGTGCCGGGAAGGTGGGCGAGGGCCTCCGGGTCCGCGCAGTTACAGCCCGGTTCTCTCATGGCTCGGGTCCGACTGAGGAGTTTGCAGCGCATGCCTCCTGTGGCTAGGGTCCCGTCCACCCGGCCGGTTGTCGAATGCGGTGGACTGCTTGCAGTGCTCCGCGACTGCTGCCGGTCGTCTGGGTGGTGATCTCGTACCATGCGC…
Barbeitos et al. 2010, PNAS	EU262853.1	NA	Animalia	Cnidaria	Anthozoa	Scleractinia	Faviidae	Colpophyllia	Colpophyllia natans	yes	2	30, 27	yes	0	NA	GAGAGTTAAAAAGTACGTGAAACCGTCGACAGGGAAACGAATGGACTCAGCAATGCGCCCTTTGAGATTCAGCCGGCGGGCGGCCTCGGCGGCGGGTTTCCGCGGATCCGAACGGACCGCGGCCCGCCGCTCGCGACCTCTCGCCGTCGCACTTCTCTCGGGCGCGCGTCAACGTCGGTCGGGACTGGGTCTGAAAGGTGCCGGGAAGGTGAGTGCGGGCCCCTCTCCGGAGGGCGTCCGCCCTGTTACAGCCCGGCTCTCCTCGCGGCCCGGGCCCGACCGAGGAGGATGCAGGGCATGCCTCTTGTGGCTAGGGTCCCGTCCCTCCGGCCGGCTGTTTTACCAGTGCGGTGGACTGCTTGCAGTGCTCGGCGACGGCTGCCGGTCGTTGGGGCGGTG…
Barbeitos et al. 2010, PNAS	EU262854.1	NA	Animalia	Cnidaria	Anthozoa	Scleractinia	Dendrophylliidae	Tubastraea	Tubastraea coccinea	yes	0	NA	yes	0	NA	GAGAGTTAAAAAGTACGTGAAACCGTTGGAAGGGAAACGAATGGACTCAGCAATGCGCCGTTTGAGATTCAGCCGGCCGGCGGGATCGGCTCGGGGTGCGCGGATCCGAATGGACCGCCGTCTCGGGCTCGTTTCTCCCGGCCGTCGCACTTCTCTTGGGCGCACGTCAACGTCGGTTGGGACTGGGTCTGAAAGGTTCCGGGAAGGTAGGTCCGCGCGTTCCTCGCGTTCGCGCGCTCTGTTACAGCCCGGTTCTCTTGCGGCTCGGGCCCGACCGAGGCGGTCGCAGCGCATGCCTCTTTTGGCTAGGGTCCCGTTCGTCCGGCCGGTTGTCGACCGCGGTGGACTGCTTGCAGTGCTCCGCGACTGCTGCCGGTCGTTCGGGCGGTGATCTCGTAC…
Barbeitos et al. 2010, PNAS	EU262855.1	NA	Animalia	Cnidaria	Anthozoa	Scleractinia	Dendrophylliidae	Balanophyllia	Balanophyllia sp.	yes	0	NA	yes	0	NA	GAGAGTTAAAAAGTACGTGAAACCGTTGGAAGGGAAACGAATGGACTCAGCAATGCGCCGTTTGAGATTCAGCCGGCCGGTTGGATCGGCCCGGGGTTAGCGGATCTGAATGGACCGCGGTCTCGGGCTCGTTTCTCCCGGCCGTCGCACTTCTCTTGGACGCACGTCAACGTCGGTTGGGACTGGGTCTCAAAGGTTCCGGGAAGGTAGGTCCGCGCGTTCCTTTGCGTTCTCGCGTTCTGTTACAGCCCGGTTCTCTTGCGGCTCGGGCCCGACCGAGGCGGTCGCAGCGCATGCCTCTTGTGGCTAGGGTCCCGTCCGTCCGGCCGGTTGTCGACCGCGGTGGACTGCTTGCAGTGCTCCGCGACTGCTGCCGGTCGTTTGGGTGGTGATCTCGTA…
Barbeitos et al. 2010, PNAS	EU262856.1	NA	Animalia	Cnidaria	Anthozoa	Scleractinia	Faviidae	Favia	Favia fragum	no	NA	NA	yes	0	NA	GAGAGTTAAAGAGTACGTGAAACCGTCTAGAGGGAAACGAATGGACTCAGCAATGCGTCCCGGCGAGATTCAGCCGGCGGGCGACCACGGTGCCGGGTCCGCGGATCCGAACGGACCGCGGCTCGGGGCTCGCGAGCTCCCGCCGTCGCACTTCTCTCGGGCGCGCGTCAACGTCGGTTGGGACTGGGTGTTAAGGGTGCCGGGAAGGTAGGCGCGGAGGCCCTCTTGCGGGGGGGCTCTTCCGCTCTGTTAACGCAGCCCGGCTTCTCGCATGACCCGGGCCCGACCGAGGCGGATACAGGGCATGCCTCTTGTGGCTAGGGGCCCGTCCTTCCGGCCGGCCGTCCGACGCGGTGGACTGCTTGCAGTGTTCGGCAATGGCTACCGGTCGTTTGGGCG…
Barbeitos et al. 2010, PNAS	EU262857.1	NA	Animalia	Cnidaria	Anthozoa	Scleractinia	Fungiidae	Sandolitha	Sandalolitha sp.	yes	1	27	yes	0	NA	GAGAGTTAAAAAGTACGTGAAACCGTCGAAAGGGAAACGAATGGACTCAGCAATGCGCCGTTTGAGATTCAGCCGGTGGGCGGGATCGGCGCGGGGTTTGCGGATCTGAATGGACCGCGGCTCCGCGCTCGTTTTCCCTCGCCGTCGCACTTCTCTTGGGCGCACGTCAACGTCGGTTGGAACTGGGTTTGAAAGGCGCCGGGAAGGTAGGTCTGGTCCTTCGGGTCCGGTCTGTTACAGCCCGGTGTTCTCATGGCTCGGGTCCGACCGAGGAGTCGCAGCGCATGCCTCTTGTGGCTAGGGTCCCGTCCTTCCGGCCGGTTGTCGAATGCGGTGGACTGCTTGCAGTGCTCCGTGACTGCTGCCGGTCGTTGGGGTGGTGATCTCGTACCATGCGCT…
Barbeitos et al. 2010, PNAS	EU262858.1	NA	Animalia	Cnidaria	Anthozoa	Scleractinia	Merulinidae	Hydnophora	Hydnophora rigida	yes	0	NA	yes	0	NA	GAGAGTTAAAAAGTACGTGAAACCGTTGGAAGGGAAACGAATGGACTCAGCAATGCGCCCTCTGAGATTCAGCCGGTGGGTGTGGTCGGCGCGGGGTTTGCGGATCTGAATGGACCGCGGCCCGGCGCTCGGCGCTCCCCCGCCGTCGCACTTCTCTGGGGCGCGCGTCAACGTGGGTTGGGACTGGGTCTGAAAGGTGCCGGGAAGGTAGGTGTGGGCCCTCGGGTCCGTTCTGTTACAGCCCGGTTCTCTCGTGGCTCGGGCCCGACCGAGGAGGAAGGGCATGCCTCCTGTGGCTAGGGTCCCGTCCTTCCGGCCGGCTGTCCAGTGCGGTGGACTGCTTGCAGTGCTCCGCGACGGCTGCCGGTCGTTGGGGTGGTGATCTCGTACCATGCCCTT…
Barbeitos et al. 2010, PNAS	EU262859.1	NA	Animalia	Cnidaria	Anthozoa	Scleractinia	Agariciidae	Agaricia	Agaricia agaricites	yes	0	NA	yes	0	NA	GAGAGTTAAAAAGTACGTGAAACCGTTGGAAGGGAAACGAATGGACTCAGCAATGCGCCGTTTGAGATTCAGCCGGCGGGTGGCGTCGGCCCGGGGTTTGCGGATCTGAATGGACCGCGGTCCCGGGCCCGGTGCTCCCGGTCGTCGCACTTCTCTTGGGCGCGCGTCAACGTCGGTTGGGACTGGGTCTGAAAGGTGCCGAGAAGGTAGGTCTGTGCGTTCCCCTCGGGGTCGCCCGGTCTGTTACAGCTCGGTTCTCTTCGCGGCTCGGGCCCGACCGAGGCGGTTGCAGCGCATGCCTCTCGTAAGGCTAGGGTCCCGTCCCTCCGGCCGGTCGTCGAATGCGGTGGACTGCGTGCAGTGCTCCGCGAATGCTGCCGGTCGTTGGGGTGGTGATCT…
Barbeitos et al. 2010, PNAS	EU262860.1	NA	Animalia	Cnidaria	Anthozoa	Scleractinia	Caryophylliidae	Crispatotrochus	Crispatotrochus rugosus	yes	0	NA	yes	0	NA	GAGAGTTAAAAAGTACGTGAAACCGTTAAAAGGGAAACGAATGGACTCAGCAATGCGCCGTTTGAGATTCAGCCGGTGGGTGGAATCGGCCCGGGGTTTGCGGATCCGAATGGACCGCGGTCTCGGGCTCGTTTCTCCCCGCCGTCGCACTTCTCTTGGGCGCGCGTCAACGTCGGTTGGGACTGGGTCTGAAAGTTGCCGGGAAGGTAGGTCTGGATCTCCGGGTCCGTTCTATTACAGCCCGGTCTCTCATGGCTCGGGCCCGACCGAGGAGTCGCAGCGCATGCCTCTTGTGGCTAGGGTCCCGTCCTTCCGGCCGGTTGTCGAAAGCGGTGGACTGCTTGCAGTGCTCCGCGACTGCTGCCGGTCGTTGGGGTGGTGATCTCGTACCATGCGCTT…
Barbeitos et al. 2010, PNAS	EU262861.1	NA	Animalia	Cnidaria	Anthozoa	Scleractinia	Rhizangiidae	Siderastrea	Siderastrea radians	yes	0	NA	yes	0	NA	GAGAGTTAAAAAGTACGTGAAACCGTTGGAAGGGAAACGAATGGACTCAGCAATGCGCCGTTTGAGATTCAGCCGGCCGGCGGGATCGGCTCGGGGTTTGCGGATCTGAATAGACCGCGGCCACGGGTTCGTTTCTCCTGGCCGTCGCACTTCTCTTGGGCGCGAGTCAACGTCGGTTGGGACTGGGTCTGAAAGGTGCCGGGAAGGTAAGTCCGTGCGTCTCCTCGGGGGCGTTCGGTCGGTTACAGCCCGGTTCTCTCATGGCTCGGGCCCGACCGTGGCGTTGCAGCGCATGCCTCTTGTGGCTAGGGTCCCATCCGTCCGGCCGGTTGTCGAATGTGGTGGACTGCTTGCAGTGCTCCGCGACTGCTGCCGGTCGTTCGGGTGGTGATCTCGTAC…
Barbeitos et al. 2010, PNAS	EU262862.1	NA	Animalia	Cnidaria	Anthozoa	Scleractinia	Fungiacyathidae	Fungiacyathus	Fungiacyathus marenzelleri	yes	0	NA	yes	0	NA	GAGAGTTAAAAAGTACGTGAAACCGTTGGAAGGGAAACGAATGGACTCAGCAATGCGCCGTCTTTGAGATTCAGCCGCGCGGGTCGGCTCGGCCCGGGACTTGCGGATCCGAACGGACCGCGGTTCTGGGCTCGTTTCGGCCCGCCGTCGCACTTCTCTTGGGCGCAAGTCAACGTCGGTTGGGTCTGGGTCTGAAAGGTTCCGGGAAGGTGAGTCGGGGCTTCGTTTCCTCTTCGGGGGTGGCGTCGCTCCGTCCGTTACAGCCTGGTTCTCTGTCTGGCTCGGACTCGACCGAGGTGGTCGCAGCGCATGCCTCTTTTGGCTAGGGTCCCGTCTCCTCCGGCCGGTCTTTCGACTGCGGTGGACTGCTTGCAGTGCTCCGCGACAGCTGCCGGTCGT…
Barbeitos et al. 2010, PNAS	EU262863.1	NA	Animalia	Cnidaria	Anthozoa	Scleractinia	Agariciidae	Leptoseris	Leptoseris sp.	yes	0	NA	yes	0	NA	GAGAGTTAAAAAGTACGTGAAACCGTTGGAAGGGAAACGAATGGACTCAGCAATGCGCCGTTTTGAGATTCAGCCGGCGGGTGGTGCCGGCCCGGGGTTTGCGGATCCGAATGGACCGCGGTCTTGGGCTCGGTGCTCCCGGCCGTCGCACTTCTCTTGGGCGCGCGTCAACGTCGGTTGGGACTGGGTCTGAAAGGTGCCGGGAAGGTAGGTCTGTGCGTCCCCTCGGGGGCGTTCGGTCTGTTACAGCCCGGTTCTCTCGCGGCTCGGGCCCGACCGAGGCGGCTTGTGTGCAGCGCATGCCTCTTGTGGCTAGGGTCCCGTCCCTCCGGCCGGTTGTCGAATGCGGTGGACTGCTTGCAGTGCTCCGCGAATGCTGCCGGTCGTTGGGGTGGTGAT…
Barbeitos et al. 2010, PNAS	EU262864.1	NA	Animalia	Cnidaria	Anthozoa	Scleractinia	Dendrophylliidae	Tubastraea	Tubastraea coccinea	yes	0	NA	yes	0	NA	GAGAGTTAAAAAGTACGTGAAACCGTTGGAAGGGAAACGAATGGACTCAGCAATGCGCCGTTTGAGATTCAGCCGGCCGGCGGGATCGGCTCGGGGTGTGCGGATCCGAATGGACCGCCGTCTCGGGCTCGTTTCTCCCGGCCGTCGCACTTCTCTTGGGCGCACGTCAACGTCGGTTGGGACTGGGTCTGAAAGGTTCCGGGAAGGTAGGTCCGCGCGTTCCTCGCGTTCGCGCGCTCTGTTACAGCCCGGTTCTCTTGCGGCTCGGGCCCGACCGAGGCGGTCGCAGCGCATGCCTCTTTTGGCTAGGGTCCCGTTCGTCCGGCCGGTTGTCGACCGCGGTGGACTGCTTGCAGTGCTCCGCGACTGCTGCCGGTCGTTCGGGCGGTGATCTCGTAC…
Barbeitos et al. 2010, PNAS	EU262865.1	NA	Animalia	Cnidaria	Anthozoa	Scleractinia	Astrocoeniidae	Stephanocoenia	Stephanocoenia intersepta	yes	0	NA	yes	0	NA	GAGAGTTAAAAAGTACGTGAAACCGTTGAAAGGGAAACGAATGGACTCAGCAATGCGCCGTTTGAGATTCAGCCGGCTGGTGGGGTCGGCCCGGGGTTTGCGGATCTGAATGGACCGCGGTCTCGGGCTCGTTCTTCCCGGCCGTCGCACTTCTCTTGGGCGCGCGTCAACGTCGGTTGGGACTGGGTCTGAAAGGTGCCGGGAAGGTAGGTCCGTGCGTCCCCTCGGGGTCGTTCGTTCTGTTACAGCCCGGTTCTCTCATGGCTCGGGCCCGACCGAGGCGGTCGCAGCGCATGCCTCTTGTGGCTAGGGTCCCGTCCGTCCGGCCGGCTGTCGAATGCGGTGGACTGCTTGCAGTGCTCCGCGACTGCTGTCGGTCGTTTGGGCGGTGATCTCGTA…
Barbeitos et al. 2010, PNAS	EU262866.1	NA	Animalia	Cnidaria	Anthozoa	Scleractinia	Dendrophylliidae	Heteropsammia	Heteropsammia sp.	yes	0	NA	yes	0	NA	GAGAGTTAAAAAGTACGTGAAACCGTTGGAAGGGAAACGAATGGACTCAGCAATGCGCCGTTTGAGATTCAGCCGGCCGGTTGGATCGGCCCGGGGTTTGCGGATCTGAATGGACCGCGGTCTCGGGCTCGTTTCTCCCGGCCGTCGCACTTCTCTTGGGCGCACGTCAACGTCGGTTGGGACTGGGTCTTAAAGGTTCCGGGAAGGTAGGTCCGCGCGTTCCTTGCGTTCTCGCGTTCTGTTACAGCCCGGTTCTCTTGCGGCTCGGGCCCGACCGAGGCGGTTGCAGCGCATGCCTCTTTTGGCTAGGGTCCCGTCCGTCCGGCCGGTTGTCGACCGCGGTGGACTGCTTGCAGTGCTCCGCGACTGCTGCCGGTCGTTTGGGTGGTGATCTCGTAC…
Barbeitos et al. 2010, PNAS	EU262867.1	NA	Animalia	Cnidaria	Anthozoa	Scleractinia	Pocilloporidae	Pocillopora	Pocillopora damicornis	yes	1	27	yes	0	NA	GAGAGTTAAAAAGTACGTGAAACCGTCAGAAGGGAAACGAATGGACTCAGCAATGCTCCCTTCGAGATTCAGCCGGTCGGCCTGCGCGCGGCTCGGGGTTTGCGGATCCGAACGGACCGCGGTCCCGGGCGCGTGCCTCGCCACCGTCGCACTTCTCTTGGGCGCGCGTCAGCGTGGGTCGGAACTGGGCGTCGGAGGTGCCGTGGAAGGTAGGTCTGGAGTCTCGGCTCCGGACTGTTACAGCCCGGCTCCCGCGGCTCGGGTCCGACCGAGGACAGTCGCAGCGCGTGCCTCTTGTGGCTAGGGTCCCGTCCTTCCGGCCGGTCGTCGACCGTGGTGGACTGCTTGCAGTGCTCCGCGACTGCTGCCGGTCGTTGGGGCGGTGTTCTCGTACGACGC…
Barbeitos et al. 2010, PNAS	EU262868.1	NA	Animalia	Cnidaria	Anthozoa	Scleractinia	Caryophylliidae	Thalamophyllia	Thalamophyllia riisei	yes	0	NA	yes	0	NA	GAGAGTTAAAAAGTACGTGAAACCGTTGGAAGGGAAACGAATGGACTCAGCAATGCGCCGTTTGAGATTCAGCCGGCGGGTGTGGTCGTCCCGGGGTTTGCGGATCTGAATGGACCGCGGTCTCGGGTGGGGCCTTCCCCTGCCGTCGCACTTCTCTTGGGCGCGCGTCAACGTCGGTCGGGACTGGGTCTAAAAGGTGCCGGGAAGGTAGGTCTGAGCGTCCCCTCGGGGGCGTTCGGTCTGTTACAGCCCGGTTCTCTCTTGGCTCGGGCCCGACCGAGGCAGTTGCAGCGCATGCCTCCTGTGGCTAGGGTCCCGTCCCTCCGGCCGGTCGTCGAATGCGGTGGACTGCTTGCAGTGCTCCGCGACCGCTGCCGGTCGTTGGGGTGGTGATCTCGT…
Barbeitos et al. 2010, PNAS	EU262869.1	NA	Animalia	Cnidaria	Anthozoa	Scleractinia	Faviidae	Mussa	Mussa angulosa	yes	1	27	yes	0	NA	GAGAGTTAAAAAGTACGTGAAACCGTCGAAAGGGAAACGAATGGACTCAGCAATGCGCCCTTTGAGATTCAGCCGGCGGGCGGTCTTGGCCCCGGGTTTGCGGATCTGAATGGACCGCGGCCCTCGGCTCTCGATCTCCCCCGCCGTCGCACTTCTCTGGGGCGCGCGTCAACGTCGGTTGGGACTGGGTCTGAAAGGTGCCGGGAAGGTAGGAGCGGGCCTTCGGGTCGGCTCTGTTACAGCCCGGCTCTCCTTCATGGCTCGGGCCCGACCGAGGCGGTTGCAGGGCATGCCTCTTGTGGCTAGGGTGCCGCCCTTCCGGCCGGCTGTTCCACTGCGGTGGACTGCTTGCAGTGCTCGGCGACGGCTGCCGGTCGTTGGGGTGGTGATCTCGTACCA…
Barbeitos et al. 2010, PNAS	EU262870.1	NA	Animalia	Cnidaria	Anthozoa	Scleractinia	Fungiidae	Zoopilus	Zoopilus echinatus	yes	1	27	yes	0	NA	GAGAGTTAAAAAGTACGTGAAACCGTCGAAAGGGAAACGAATGGACTCAGCAATGCGCCGTTTGAGATTCAGCCGGTGGGCGGGATCGGCGCGGGGTTTGCGGATCTGAATGGACCGCGGCTCCGCGCTCGTTTTCCCTCGCCGTCGCACTTCTCTTGGGCGCACGTCAACGTCGGTTGGAACTGGGTTTGAAAGGCGCCGGGAAGGTAGGTCTGGTCCTTCGGGTCCGGTCTGTTACAGCCCGGTGTTCTCATGGCTCGGGTCCGACCGAGGAGTCGCAGCGCATGCCTCTTGTGGCTAGGGTCCCGTCCTTCCGGCCGGTTGTCGAATGCGGTGGACTGCTTGCAGTGCTCCGTGACTGCTGCCGGTCGTTGGGGTGGTGATCTCGTACCATGCGCT…
Barbeitos et al. 2010, PNAS	EU262871.1	NA	Animalia	Cnidaria	Anthozoa	Corallimorpharia	Ricordeidae	Ricordea	Ricordea florida	yes	1	27	no	NA	NA	GAGAGTTAAAAAGTACGTGAAACCGTCGAAAGGGAAACGAATGGAACTAGCAATGCGCCCGGCGAGATTCAGCCGGCCGGTCTCGAGCGTGGCGGAGGTTGGCGGATTCGAATGGACCGCTGCCTCGGGCGACTCGTTTTCCGGACGTCGCACTTCTCTCGGGCGCGCGTCAACGTGGGTCGGTCGTGGGTTTGAAAGGTTCCGGTAAGGTAGGCGCGGGCTTTTTCCCTTCTCGGAGGGTGACGGCACCGCGTCTTTAGAGACCGGTTCGCTTCTCGGCCCGCGGTCGACCGAGGTGGTGGCAGCGCATGCCTCTTCGTGCTGGCTAGGGTCCCGCCCCTCCGGTCGGTGCGAGACGCGGTGGACTGCTCGCAGTGCTCCGCGACCCGCGCCGGTCGT…
Barbeitos et al. 2010, PNAS	EU262872.1	NA	Animalia	Cnidaria	Anthozoa	Scleractinia	Meandrinidae	Eusmilia	Eusmilia fastigiata	yes	0	NA	yes	0	NA	GAGAGTTAAAAAGTACGTGAAACCGTTGAAAGGGAAACGAATGGACTCAGCAATGCGCCGTTTGAGATTCAGCCGGTGGGTGGGATCGGCTCGGGGTTTGCGGATCTGAATGGACCGCGGCCTTGGGCTCGTTTCTCCTCGCCGTCGCACTTCTCTTGGGCGCGCGTCAACGTCGGTTGGGACTGGGTCTGAAAGGTGCCGGGAAGGTAGGTCTGGACCTCCGGGTCCGGTCTGTTACAGCCCGGTTCTCTCATGGCTCGGGCCCGACCGAGGAGTGGCAGCGCATGCCTCTTGTGGCTAGGGTGCCGTCCTTCCGGCCGGTTGTCGAATGCGGTGGACTGCTTGCAGTGCTCCGCGACCGCTGCCGGTCGTTGGGGTGGTGATCTCGTACCATGCGCT…
Barbeitos et al. 2010, PNAS	EU262873.1	NA	Animalia	Cnidaria	Anthozoa	Scleractinia	Pocilloporidae	Madracis	Madracis decactis	yes	1	27	yes	0	NA	GAGAGTTAAAAAGTACGTGAAACCGTCGAAAGGGAAACGAATGGACTCAGCAATGTGCCGTTTGAGATTCAGCCGCGCGGGCGGGTGCGGCTCGGGGTTTGCGGATCTGAATGGACCGCGGTCTCGGGCTCGTCTCCCCCCGCCGGCGCACTTCTCTTGGGCGCGCGTCAACGTCGGTTGGAACTGGGCCTGAAAGGTGCCGGGAAGGTAGGTTCGCACCCTCGGGTGCGGACTGTTACAGCCCGGCTCTTGCGGCTCGGGTCCGACCGTGGCGGTTGCAGTGCATGCCTCTTGTGGCTAGGGTCCCGCCCTTCCGGCCGGTCGTCGAATGCGGTGGACTGCTTGCAGTGCTCCGCGACCGCTGCCGGTCGTTGGGGTGGTGATCTCGTACCATGCACT…
Barbeitos et al. 2010, PNAS	EU262874.1	NA	Animalia	Cnidaria	Anthozoa	Scleractinia	Merulinidae	Catalaphyllia	Catalaphyllia jardinei	yes	2	28, 27	yes	1	44	GAGAGTTAAAGAGTACGTGAAACCGTCCAAAGGGAAACGAATGCACTCAGCAATGCGCCCTCTGAGATTCAGCCGGTGGGTGGCGTCGGCGCAGGGTCTTTTTGCGGATCCGAATGGACCGCGGCCCGGCGCTCGCCGTCTCTCTCTCCCCGCCGTCGCACTTCTCTGGGGCGCGCGTCAAGGTGGGTTGGGACTGGGTCTAAAAGGTGCCGGGAAGGTAGGTCTGGGCCCCTTTTCCAAGGGCGTCCGTTCTGTTACAGCCCGGTTCTTGTCACGACTCGGGCCCGACCGAGGAGGCAGGGCATGCCTAGTGTGGCTAGGGTCCCGCCCTTCCGGCCGGCTGCTCCAATGCGGGGGACTGCTTGCAGTGCTCGGCGACGGCTGCCGGTCGTTGGGGTG…
Barbeitos et al. 2010, PNAS	EU262875.1	NA	Animalia	Cnidaria	Anthozoa	Scleractinia	Meandrinidae	Dichocoenia	Dichocoenia stokesii	yes	0	NA	yes	0	NA	GAGAGTTAAAAAGTACGTGAAACCGTTGAAAGGGAAACGAATGGACTCAGCAATGCGCCGTTTGAGATTCAGCCGGTGGGTGGGATCGGCTTCGGGTTTGCGGATCTGAATGGACCGCGGCCTGGGGCTCGTTTCTCCTCGCCGTCGCACTTCTCTTGGGCGCGCGTCAACGTCGGTTGGGACTGGGTCTGAAAGGTGCCGGGAAGGTAGGTCTGGACCTCCGGGTCCGGTCTGTTACAGCTCGGTTCTCTCATGGCTCGGGCCCGACCGAGGAGTGGCAGCGCATGCCTCTTGTGGCTAGGGTGCCGTCCTTCCGGCCGGTTGTCGAATGCGGTGGACTGCTTGCAGTGCTCCGCGACTGCTGCCGGTCGTTGGGGTGGTGATCTCGTACCATGCGCT…
Barbeitos et al. 2010, PNAS	EU262876.1	NA	Animalia	Cnidaria	Anthozoa	Scleractinia	Lobophylliidae	Oxypora	Oxypora sp.	yes	0	NA	yes	0	NA	GAGAGTTAAAAAGTACGTGAAACCGTTGAAAGGGAAACGAATGGACTCAGCAATGCGCCGTTTGAGATTCAGCCGGTGGGCGGCCTCGGCGCGGGGTTTGCGGATCTGAATGGACCGCGGCCCGGCGCTCGTGGCCTCCCGCCGTCGCACTTCTCTTGGGCGCGCGTCAACGTCGGTTGGGACTGGGTCTGAAAGGTGCCGGGAAGGTAGGTGTGGGCCCTCGGGTCCGTTCTGTTACAGCCCGGTTCTCTCCTGGCTCGGCCCCGACCGAGGCGTTGCAGGGCATGCCTCTTGTGGCTAGGGTCCCGTCCTTCCGGCCGGCTGTCGACTGCGGTGGACTGCTTGCAGTGCTCGGCGAACGCTGCCGGTCGTTGGGATGGTGATCTCGTACCATGCCCT…
Barbeitos et al. 2010, PNAS	EU262877.1	NA	Animalia	Cnidaria	Anthozoa	Scleractinia	Poritidae	Porites	Porites divaricata	yes	1	28	yes	0	NA	GAGAGTTAAAAAGTACGTGAAACCGTTTGAAGGGAAACGAATGGACTCAGCAATGCGCCCTTTGAGATTCAGCCGGGCGGTTGTGGCGGTCCGGGGCTTGCGGATCTGAATGGACCGCGGTCTCGGGCCCGTTGCTTCCGACCGTCGCACTTCTCTTGGACGCGAGTCAACGTCGGTTGGGACTGGGCCTCAAAGGTTCCGGGAAGGTAGGTCGGGACGCTCGCGTTCGGACTGTTACAGCCCGGTTCTCTCCCGGCTCGGGCCCGACCGAGGCGGATGCAGCACATGCCTCTTCTGGCTAGGGTCCCGTCCTTCCGGCCGGTTGTCGAATGCGGTGGACTGCTTGCAGTGCTCTGCGATTGCTGCCGGTCGTTGGGGTGGTGATCTCGTACCATGTGC…
Barbeitos et al. 2010, PNAS	EU262878.1	NA	Animalia	Cnidaria	Anthozoa	Scleractinia	Poritidae	Porites	Porites porites	yes	1	28	yes	0	NA	GAGAGTTAAAAAGTACGTGAAACCGTTTGAAGGGAAACGAATGGACTCAGCAATGCGCCCTTTGAGATTCAGCCGGGCGGTTGTGGCGGTGCGGGGCTTGCGGATCTGAATGGACCGCGGTCTCGGGCCCGTTGCTTCCGACCGTCGCACTTCTCTTGGACGCGAGTCAACGTCGGTTGGGACTGGGCCTCAAAGGTTCCGGGAAGGTAGGTCGGGACGCTCGCGTTCGGACTGTTACAGCCCGGTTCTCTCCCGGCTCGGGCCCGACCGAGGCGGATGCAGCACATGCCTCTTCTGGCTAGGGTCCCGTCCTTCCGGCCGGTTGTCGAATGCGGTGGACTGCTTGCAGTGCTCTGCGATTGCTGCCGGTCGTTGGGGTGGTGATCTCGTACCATGTGC…
Barbeitos et al. 2010, PNAS	EU262879.1	NA	Animalia	Cnidaria	Anthozoa	Scleractinia	Caryophylliidae	Ceratotrochus	Ceratotrochus magnaghii	yes	2	27, 28	yes	0	NA	GAGAGTTAAAAAGTACGTGAAACCGTCTAAAGGGAAACGAATGGACTCAGCAATGCGCCGGTCGAGATTCAGCCGGTCGGCGGGATCGGCCCGTGGCTTGCGGATCCGAATGGACCGCGGCCCGGGACTCGTTTCCCCCGGCCGTCGCACTTCTCTTGGGCGCGCGTCAACATCGGTTGGGACTGGGTCTGAAAGGTGCCTGGAAGGTGGGTTCGGCTGCCTCTTTTTTGAGGTGGCCGTTCTGTTACAGCCAGGTTCTCCTCATGGCTCGGGCCCGACCGAGGAGTAAATATGAGGCAGCGCACGCCGATGGCGGCTAGGGTCCCGACCCTCCTTCCGGTCGTCGAATGCGGTGGACTGCTTGCAGTGTTCCGCGCCCGCTGCCGGTCCTTGGGTTGG…
Barbeitos et al. 2010, PNAS	EU262880.1	NA	Animalia	Cnidaria	Anthozoa	Scleractinia	Fungiidae	Polyphyllia	Polyphyllia sp.	yes	1	27	yes	0	NA	GAGAGTTAAAAAGTACGTGAAACCGTCGAAAGGGAAACGAATGGACTCAGCAATGCGCCGTTTGAGATTCAGCCGGTGGGCGGGATCGGCGCGGGGTTTGCGGATCTGAATGGACCGCGGCTCCGCGCTCGTTTTCCCTCGCCGTCGCACTTCTCTTGGGCGCACGTCAACGTCGGTTGGAACTGGGTTTGAAAGGCGCCGGGAAGGTAGGTCTGGTCCTTCGGGTCCGGTCTGTTACAGCCCGGTGTTCTCATGGCTCGGGTCCGACCGAGGAGTCGCAGCGCATGCCTCTTGTGGCTAGGGTCCCGTCCTTCCGGCCGGTTGTCGAATGCGGTGGACTGCTTGCAGTGCTCCGTGACTGCTGCCGGTCGTTGGGGTGGTGATCTCGTACCATGCGCT…
Barbeitos et al. 2010, PNAS	EU262881.1	NA	Animalia	Cnidaria	Anthozoa	Scleractinia	Fungiidae	Lobactis	Lobactis scutaria	yes	1	27	yes	0	NA	GAGAGTTAAAAAGTACGTGAAACCGTCGAAAGGGAAACGAATGGACTCAGCAATGCGCCGTTTGAGATTCAGCCGGTGGGCGGGATCGGCGCGGGGTTTGCGGATCTGAATGGACCGCGGCTCCGTGCTCGTTTTCCCTCGCCGTCGCACTTCTCTTGGGCGCACGTCAACGTCGGTTGGAACTGGGTTTGAAAGGCGCCGGGAAGGTAGGTCTGGTCCTTCGGGTCCGGTCTGTTACAGCCCGGTGTTCTCATGGCTCGGGTCCGACCGAGGAGTCGCAGCGCATGCCTCTTGTGGCTAGGGTCCCGTCCTTCCGGCCGGTTGTCGAATGCGGTGGACTGCTTGCAGTGCTCCGTGACTGCTGCCGGTCGTTGGGGTGGTGATCTCGTACCATGCGCT…
Barbeitos et al. 2010, PNAS	EU262882.1	NA	Animalia	Cnidaria	Anthozoa	Corallimorpharia	Ricordeidae	Ricordea	Ricordea florida	yes	1	27	no	NA	NA	GAGAGTTAAAAAGTACGTGAAACCGTCGAAAGGGAAACGAATGGAACTAGCAATGCGCCCGGCGAGATTCAGCCGGCCGGTCTCGGGCGTGGCGGAGGTTGGCGGATTCGAATGGACCGCTGCCTCGGGCGACTCGTGTTCCGGACGTCGCACTTCTCTCGGGCGCGCGTCAACGTGGGTCGGTCGTGGGTTTGAAAGGTTCCGGTAAGGTAGGCGCGGGCTTTCTCCTTTCTCGGAGGGGGATGGCACCGTTTCTTTAGAGACCGGTTCGCTTCTCGGCCCGCGGTCGACCGAGGTGGTGGCAGCGCATGCCTCTTCGTGCTGGCTAGGGTCCCGCCCCTCCGGTCGGTGCGAGACGCGGTGGACTGCTCGCAGTGCTCCGCGACCCGCGCCGGTCGT…
Brugler et al. 2013, Zoological Journal of the Linnean Society	FJ429304.1	NA	Animalia	Cnidaria	Anthozoa	Antipatharia	Antipathidae	Antipathes	Antipathes griggi	yes	0	NA	no	NA	NA	GAGAGTTAAAAAGTACGTGAAACCGTTGAAAGGGAAACGAATGGAGCTAGCAATGCACCCTGCGAGATTCAGCCGGCGGGTGGCGAGGGCGCGCGGCTCGCAGATCTGAATTGACTGTGGCCGCGCGASTCGCGCTCCCCGCCGTCGCACTTCTCGCGGGTGCGCGTCAACATGGGTCGGGACCGGGTCTCACAGGCGCGGGCAAGGTAGGTCCGTCCCCTCGGGGAGGGACTGTTTAGGCCAGCGTTCTAGCGGCTCGGGCCCGATCGAGGAGTCGCAGCACATGCCTCTTGTGGCTGGGGTCCCGTCTCTCCGGTTGGTTGTCGACCGTGGTGGACTGCTTGCAGTGCACCGCAACTGCTGCCGGTCGCTGGGGCGGTGACTTCGCACTATGTGCTT…
Brugler et al. 2013, Zoological Journal of the Linnean Society	FJ429305.1	NA	Animalia	Cnidaria	Anthozoa	Antipatharia	Cladopathidae	Trissopathes	Trissopathes pseudotristicha	yes	0	NA	no	NA	NA	GAGAGTTAAAAAGTACGTGAAACCGTTAAAAGGGAAACGAATGGAGCTAGCAATGCACCCTGTGAGATTCAGCCGGTCGGTGGTCCGGGCGTGTGGTTTGCAGATCCGAATCGACTGTGGCCACACGCTTCTGGCTTCCTGCCGTCGCACTTCCCGCGGGTGCGCGTCAACATGGGTTGGGACCGGGTCTGAAAGGCACTGGCAAGGTAGGTCCGCACCTTCGGGTTCGTACTGTTCTAGGCCGGCGTTTTCGCGGCCCGTGCCTGACCGAGGAGTTTGCAGCACATGCCTCGTTTGGCTGGGGTCCCGTCCTGCCGGTTGGCTGTCGACTGTGGTGGACTGCGTGCAGTGCCACCGCGACTGCAGCCGGTCGCTGGGGTGGTGACTTCGCACGATGTG…
Brugler et al. 2013, Zoological Journal of the Linnean Society	FJ626232.1	NA	Animalia	Cnidaria	Anthozoa	Antipatharia	Antipathidae	Stichopathes	Stichopathes cf. flagellum	yes	0	NA	no	NA	NA	GAGAGTTAAAAAGTACGTGAAACCGTTAAAAGGGAAACGAATGGAGCTAGCAATGCACCCTGCGAGATTCAGCCGGTGGGTGGTTCGGGCGTGCGGTTTGCAGATCTGAATTGACTGCGGCCGCGCGGTTCGGGCTCCCCGCCGTCGCACTTCTCGCGGGTGCGCGTCAACATGGGTTGGGACCGGGTCTTAAAGGCGCTGGCAAGGTAGGTCCGTCCCTTCGGGGACTGACTGTTTAGGCTGGCGTTCTCGCGGCCCGGGTCCGACCGAGGTGATGCAGCACATGCCTCTTGTGGCTGGTGTCTCGTTCCTCCGGTTGGTTGTCGACTGCGGTGGACTGCTTGCAGTGCACCGCGACTGCTGCCGGTCGCTGGGGCGATGACTTCGCACTATGTGCTT…
Brugler et al. 2013, Zoological Journal of the Linnean Society	FJ626233.1	NA	Animalia	Cnidaria	Anthozoa	Antipatharia	Aphanipathidae	Elatopathes	Elatopathes abietina	yes	0	NA	no	NA	NA	GAGAGTTAAAAAGTACGTGAAACCGTTAAAAGGGAAACGAATGGAGCTAGCAATGCACCCTGCGAGATTCAGCCGGTGGGTGGTTCGGGCGCGTGGTTTGCAGATCTGAATCGACTGCGGCCGCGCGGTTCGGGCTCCCCGCCGTCGCACTTCTCGCGGGTGCGCGTCAACATGGGTTGGGACCGGGTCTTAAAGGCGTCGGCAAGGTAGGTCCGTCCTCTCGGGGTCGGACTGTTTAGGCCAGCGTTCTCACGGCCCGGGCCCGACCGAGGTGCTGCAGCACATGCCTCTTGTGGCTGGGGTCTCGTTCCTCCGGTTGGTTGTCGACCGTGGTGGACTGCTTGCAGTGCACCGCGACTGCTGCCGGTCGCTGGGGCGGTGACTTCGCACTATGTGCTT…
Brugler et al. 2013, Zoological Journal of the Linnean Society	FJ626234.1	NA	Animalia	Cnidaria	Anthozoa	Antipatharia	Aphanipathidae	Aphanostichopathes	Aphanostichopathes cf. dissimilis	yes	0	NA	no	NA	NA	GAGAGTTAAAAAGTACGTGAAACCGTTAAAAGGGAAACGAATGGAGCTAGCAATGCACCCTGCGAGATTCAGCCGGTGGGTGGTTCGGGCGCGCGGTTTGCAGATCTGAATTGACTGCGGCCGCGTGGTTTGGGCTCCCCTCCGTCGCACTTCTCGCGGGTGCGAGTCAACATGGGTTGGGACCGGGTCTTAAAGGCGTCGGCAAGGTAGGTCCGTCCCTCCGGGGTCGGACTGTTTAGGCCGGCGTTCTCGCGGCTCGGGCCCGACCGAGGTGATTGCAGCACATGCCTCTTGTGGCTGGTGTCTCGTTCCTCCGGTTGGTTGTCGACCGTGGTGGACTGCTTGCAGTGCACCACGACTGCTGCCGGTCGCTGGGGCGGTGACTTCGCACGATGTGCT…
Brugler et al. 2013, Zoological Journal of the Linnean Society	FJ626235.1	NA	Animalia	Cnidaria	Anthozoa	Antipatharia	Schizopathidae	Parantipathes	Parantipathes cf. hirondelle	yes	0	NA	no	NA	NA	GAGAGTTAAAAAGTACGTGAAACCGTTAAAAGGGAAACGAATGGAGCTAGCAATGCACCCAGTGAGATTCAGCCTGTAGGTGGCTAGGGCGCGCTGTTTGCAGATCTGAATTGACTGCTGCAGTGCGGTTCGAGCTCCCTGCCGTCGCACTTCTCGCGGGCGCGCGTCAACATGGGTTGGGACCGGGTCTTAAAGGCACCGGCAAGGTAGGTCCGTACCTCCGGGTACGTACTGTTCTAGGCCGACGTTCTCGCGGCCCGGGCCCGACCGAGGCGATGCAGCACATGCCTCTTGTGGCTGGGGTCCCGTTCTTCCGGTTGGTTGTCGACTGTGGTGGACTGCGTGCAGTGCACCACGACCGCTGCCGGTCGCTTGGGCGGTGACTTCGCATGATGTGCT…
Brugler et al. 2013, Zoological Journal of the Linnean Society	FJ626236.1	NA	Animalia	Cnidaria	Anthozoa	Antipatharia	Schizopathidae	Dendrobathypathes	Dendrobathypathes boutillieri	yes	0	NA	no	NA	NA	GAGAGTTAAAAAGTACGTGAAACCGTTAAAAGGGAAACGAATGGAGCTAGCAATGCACCCAGTGAGATTCAGCCGGTTGGTGGCTTGGGCGCTCCGTTTGCAGATCTGAATTGACTGCGGCGGTGTGGTTCGARCTCCCTGCCGTCGCACTTCTCGCGGGCGCGCGTCAACATGGGTTGGGACCGGGTCTAAAAGGCACCGGCAAGGTAGGTCCGTACCTCCGGGTACGTACTGTTCTAGGCCGGCGTTCTCGCGGCCCGGGCCCGACCGAGGCGATGCAGCACATGCCTCTTGTGGCTGGGGTCCCGTTCTTCCGGTTGGYTGTCGACTGTGGTGGACTGCGTGCAGTGCACCGCRACTGCTGCCGGTCGCTGGGGCGGTGACTTCGCATGATGTGCT…
Brugler et al. 2013, Zoological Journal of the Linnean Society	FJ626237.1	NA	Animalia	Cnidaria	Anthozoa	Antipatharia	Schizopathidae	Stauropathes	Stauropathes cf. punctata	yes	0	NA	no	NA	NA	GAGAGTTAAAAAGTACGTGAAACCGTTAAAAGGGAAACGAATGGAGCTAGCAATGCACCCCGTGAGATTCAGCTGGTTGGTGGCTCGGCCGCGATGTTTGCAGATCTGAATTGACTGCGGCTTTGTGGTTCGAACTCCCTGCCATCGCACTTCTCGCGGGCGCGCGTCAACATGGGTTGGGACCGGGTCTAAAAGGCACCGGCAAGGTAGGTCCGCACCTCCGGGTACGTACTGTTCTAGGCCGGCGCTCTAGCGGCCCGGGCCCGACCGAGGCGATGCAGCACATGCCTCTTGTGGCTGGGGTCCCGTTCTTCCGGTTGGTTGTCGACTGTGGTGGACTGCGTGCAGTGCACCGCGACTGCTGCCGGTCGCTTGGGCGGTGACTTCGCATGATGTGCT…
Brugler et al. 2013, Zoological Journal of the Linnean Society	FJ626238.1	NA	Animalia	Cnidaria	Anthozoa	Antipatharia	Aphanipathidae	Acanthopathes	Acanthopathes thyoides	yes	0	NA	no	NA	NA	GAGAGTTAAAAAGTACGTGAAACCGTTAAAAGGGAAACGAATGGAGCTAGCAATGCATCCTGTGAGATTCAGCCGGTGGGTGGTCCGGGTGCGTGGTTTGCAGATCTGAATTGACTGCGGCCGCGTGGTTCGGGCTCCCCGCCGTCGCACTTCTCGCGGGTGCGCGTCAGCATGGGTTGGGACCGGGTCTCAAAGGCATCGGCAAGGTAAGTCCGACCCTTCGGGGCCGTTCTGTTCTAGGCCGGTGTTTTCACGGCTCGGGCCCGACCGAGGTTGTTGCAGTACATGCCTCTTGTGGCTGGGGTCCCGTTCCTCCGGTTGGTTGTCGACCGTGGTGGACTGCGTGCAGTGCACCGCAACCGCTGCCGGTCGCTGGGGCAGTGACTTCGCACTATGTGC…
Brugler et al. 2013, Zoological Journal of the Linnean Society	FJ626239.1	NA	Animalia	Cnidaria	Anthozoa	Antipatharia	Antipathidae	Antipathes	Antipathes atlantica	yes	0	NA	no	NA	NA	GAGAGTTAAAAAGTACGTGAAACCGTTGAAAGGGAAACGAATGGAGCTAGCAATGCACCCTGCGAGATTCAGCCGGTGGGCGGCGTGGCCGTGCGGTTCGCAGATCCGAATCGACTGTGGCCGTGCGGTTCGCGTCCCCCGCCGTCGCACTTCTCGCGGGTGCGCGTCAACATGGATCGGAACCGGGTCTCACAGGCGTCGGCAAGGTAGGTCCGTCCTCTCGGGGATGTTCTGTTATAGGCCGGCGTTCTCGCGGCTCGGGTCCGATCGAGGAGTCGCAGCACATGCCTCTCGGGGCTGGGGTCCCGTCTCTCCGGTTGGTTGTCGACCGCGGTGGACTGCTTGCAGTGCACCGCAACTGCTGCCGGTCGCTGGGGCGGTGACGTCGCACTATGTGCT…
Brugler et al. 2013, Zoological Journal of the Linnean Society	FJ626240.1	NA	Animalia	Cnidaria	Anthozoa	Antipatharia	Myriopathidae	Tanacetipathes	Tanacetipathes barbadensis	yes	0	NA	no	NA	NA	GAGAGTTAAAAAGTACGTGAAACCGTTAAAAGGGAAACGAATGGAGCTAGCAATGCACCCTGCGAGATTCAGCCGGTGGGTGGYTCGGGCAYGTAGTTTGCAGATCTGAATTGACTGCGGCCGCGTGGTTCGGGCTCCTCGCCGTCGCACTTCTCGCGGGTGCGCGTCAACATGGGTTGGGACCGGGTCTTAAAGGCGTTGGCAAGGTAGGTCCGTCCCTTCGGGGACTGACTGTTTAGGCCAGCGTTCTCACGGCCCGGGCCCGGCTGAGGAGTTGCAGCACATGCCTCTTGTGGCTGGGGTCCCGTTCCTCCGGTTGGTTGTCGACTGTGGTGGACTGCTTGCAGTGCACCGCGACTGCTGCCGGTCGCTGGGGCGGTGRCTTCGCACTATGTGCTT…
Brugler et al. 2013, Zoological Journal of the Linnean Society	FJ626241.1	NA	Animalia	Cnidaria	Anthozoa	Antipatharia	Leiopathidae	Leiopathes	Leiopathes cf. expansa	yes	0	NA	no	NA	NA	GAGAGTTAAAAAGTACGTGAAACCGTTAAAAGGGAAACGAATGGAGCTAGCAATGCGCCCTGTGAGATTCAGCCGGCCGGTGGTCCAGGCGCGTGGCTTGCAGATCTGAATTGACTGCGGCCGCGTGGTTTGGGCTCCCGACCGTCGCACTTCTTGCGGGCGCGCGTCAACATGGGTTGGGAGTGGGTCTGAAAGGCACCGGGAAGGTAGGTCCGACCCCTCGGGGCTGGTCTGTTATAGTCCGGTGTTCTCATGGCTCGCGCCCGACCGAGGAGTTGCAGCACATGCCTCTTGTGGCTGGGGTCCCGTCGTTCCGGTTGGTTGTCGACGGNNNNNNNNTGCGTGCAGTGCACCGCGACTGCTGCCGGTCGCTACGGTGGTGACTTCGCACCATGTGCT…
Brugler et al. 2013, Zoological Journal of the Linnean Society	FJ626242.1	NA	Animalia	Cnidaria	Anthozoa	Antipatharia	Aphanipathidae	Phanopathes	Phanopathes expansa	yes	0	NA	no	NA	NA	GAGAGTTAAAAAGTACGTGAAACCGTTAAAAGGGAAACGAATGGAGCTAGCAATGCACCCTGCGAGATTCAGCCGGTGGGTGGCCCGGGCGCGCGGTTTGCAKATCTGAATTGACTGCGGCCGCGCGGTTCGGGCCCCCCGCCGTCGCACTTCTCGCGGGTGCGCGTCAACATGGGTTGGAACCGGGTCTCAAAGGCGTCGGCAAGGTAGGTCCGTCCCTTCGGGGCCGGACTGTTTAGGCCGGCGTTCTCGCGGCCCGGGTCCGACCGAGGAGATGCAGCACATGCCTCTTGTGGCTGGTGTCCCGTTCCTCCGGTTGGTTGTCGAATGTGGTGGACTGCTTGCAGTGCACCGCGACTGCTGCCGGTCGCTGGGGCGGTGACTTCGCACTATGTGCTT…
Brugler et al. 2013, Zoological Journal of the Linnean Society	FJ626243.1	NA	Animalia	Cnidaria	Anthozoa	Antipatharia	Antipathidae	Cirrhipathes	Cirrhipathes anguina	yes	0	NA	no	NA	NA	GAGAGTTAAAAAGTACGTGAAACCGTTGAAAGGGAAACGAATGGAGCTAGCAATGCACCCTGCGAGATTCAGCCGGTGAGTGGCGCGGGCGCGCGGTTCGCAGATCTGAATTGACTGTGGCCGCGCGGTTCGCGCTCCCCGCCGTCGCACTTCTCGCGGGTGCGCGTCAACATGGGTCGGGACCGGGTCTCACAGGCGCGGGCAAGGTAGGTCCGTCCCCTCAGGGGGAGGGACTGTTTAGGCCCGCGTTCTAGCGGCTCGGGTCCGATCGAGGAGTCGCAGCACATGCCTCTTGTGGCTGGGGTCCCGTCTCTCCGGTTGGTTGTCGACCGTGGTGGACTGCTTGCAGTGCACCACGACTGCTGCCGGTCGCTGGGGCGGTGGCTTCGCACTATGTGC…
Thoma et al., GenBank - unpublished, submitted 2009	FJ642926.1	NA	Animalia	Cnidaria	Anthozoa	Malacalcyonacea	Malacalcyonacea_incertae_sedis	Calcigorgia	Calcigorgia sp.	yes	0	NA	no	NA	NA	GAGAGTTAAAAAGTACGTGAAACCGTTGAAAGGGAAGCGAATGGAGTTAGCAATTCGCCCTGCCAGATTCAGCCGTTCGCGCTTCGCGACGTGCGCGCTCTCGATCCGCATGGACGAGACGTGTGCGGGTGCGTTGCGCGGTCGGCGCACTTCTGGCGGGCGAGCGTCAGCGTCGGTTGTCGACGGGCGACAAGGTCGCGAGGAAGGTAGGCGGTCCCTCACGGGACTGCTGTTAAGCCTCGCGCTCGTATAGCTCGACGGCGACCGTGGATCTGCGACGCGTGCCTAGCTGGCGACTCGAACGAWCGGTCCGGCATGTCGACTGTGGCGGACGGCACGCCTGTGCGCTCGAACTGCTGCCGGTCGATYGGACGATGTTCGCACACTACGCGTCGAGGA…
Thoma et al., GenBank - unpublished, submitted 2009	FJ642927.1	NA	Animalia	Cnidaria	Anthozoa	Malacalcyonacea	Paramuriceidae	Acanthogorgia	Acanthogorgia sp.	yes	0	NA	no	NA	NA	GAGAGTTAAAAAGTACGTGAAACCGTTGAAAGGGAAGCGAATGGAGTTAGCAATTCGCCCTGCCAGATTCAGTTGCTCGCACGTCGCGACGTACGCGCTCTCGATCCGCATGGACGAGACGTGTGCGGSTGCGACGTGCGGTCTGCGCACTTCTGGCGAGCGAGCGTCAGCGTCGGTTGTCGACGGGCGACAAGGATGCGGGGAATGTGCGCCGGYCTTCGCGGCCGGTTGTTATAGCCCCGCGATCGCATAGCTCGACGGCGACCGTGGCTCTGCGACGCGTGCCTGGCTGGCGACTCGAACGATCGKTYCGGCATGTCGACYGTGGCGGACGGCACGCCTGTGCGCTCGAACTGCTGCCGGCCGATCGGACGATGTTCGCACACTACGCGTCGAGGA…
Thoma et al., GenBank - unpublished, submitted 2009	FJ642928.1	NA	Animalia	Cnidaria	Anthozoa	Malacalcyonacea	Malacalcyonacea_incertae_sedis	Calcigorgia	Calcigorgia sp.	yes	0	NA	no	NA	NA	GAGAGTTAAAAAGTACGTGAAACCGTTGAAAGGGAAGCGAATGGAGTTAGCAATTCGCCCTGCCAGATTCAGCCGTTCGCGCTTCGCGACGTGCGCGCTCTCGATCCGCATGGACGAGACGTGTGCGGGTGCGTTGCGCGGTCGGCGCACTTCTGGCGGGCGAGCGTCAGCGTCGGTTGTCGACGGGCGACAAGGTCGCGGGGAAGGTAGGCGGGCCCTCACGGGACTGCTGTTAAGCCTCGCGCTCGTATAGCTCGACGGCGACCGTGGCTCTGCGACGCGTGCCTAGCTGGCGACTCGAACGATCGGTCCGGCATGTCGACTGTGGCGGACGGCACGCCTGTGCGCTCGAACTGCTGCCGGTCGATCGGACGATGTTCGCACACTACGCGTCGAGGA…
Thoma et al., GenBank - unpublished, submitted 2009	FJ642929.1	NA	Animalia	Cnidaria	Anthozoa	Malacalcyonacea	Paramuriceidae	Placogorgia	Placogorgia sp.	yes	0	NA	no	NA	NA	GAGAGTTAAAAAGTACGTGAAACCGTTGAAAGGGAAGCGAATGGAGTTAGCAATTCGCCCCGCCAGATTCAGTTGCTCGCACGTCGCGACGTACGCGCTCTCGATCCGCATGGACGAGACGTGTGCGGGTGCGACGTGCGGTCTGCGCACTTCTGGCGAGCGAGCGTCAGCGTCGGTTGTCGACGGGCGACAAGGACGCGGGGAAGGTGGGCTGGCCTTCACGGCCGGTTGTTACAGCCCCGTGCTCGCATAGCTCGACGGCGACCGTGGCTCGGCGACGCGTGCCTGGCTGGTGACTCGAACGATCGGTCCGGCATGTCGACCGTGGCGGACGGCACGCCTGTGCGCTCAAACCGCTGCCGGTCGATCGGACGGTGTTCACACACTACGCGTCAAAGA…
Thoma et al., GenBank - unpublished, submitted 2009	FJ642930.1	NA	Animalia	Cnidaria	Anthozoa	Malacalcyonacea	Paramuriceidae	Acanthogorgia	Acanthogorgia sp.	yes	0	NA	no	NA	NA	GAGAGTTAAAAAGTACGTGAAACCGTTGAAAGGGAAGCGAATGGAGTTAGCAATTCGCCCTGCCAGATTCAGTTGCTCGCACGTCGCGACGTACGCGCTCTCGATCCGCATGGACGARACGTGTGCGGGTGCGACGTGCGGTCTGCGCACTTCTGGCGAGCGAGCGTCAGCGTCGGTTGTCGACGGGCGACAAGGAYGCGGGGAAKGTGCGCCGGCCTTCGCGGCCGGTTGTTATAGCCCCGCGATCGCATAGCTCGACGGCGACCGTGGCTCTGCGACGCGTGCCTGGCTGGCGACTCGAACRATCGGTCCGGCATGTCGACCGTGGCGGACGGCACGCCTGTGCGCTCGAACTGCTGCCGGCCGATCGGACGATGTTCGCACACTACGCGTCGAGGA…
Thoma et al., GenBank - unpublished, submitted 2009	FJ642931.1	NA	Animalia	Cnidaria	Anthozoa	Malacalcyonacea	Gorgoniidae	Leptogorgia	Leptogorgia capverdensis	yes	0	NA	no	NA	NA	GAGAGTTAAAAAGTACGTGAAACCGTTGAAAGGGAAGCGAATGGAGTTAGCAATTCGCCCTGCTAGATTCAGCCGTTCGCGCTTCGCGACGTGCGCGCTCTCGATCCGCATGGACGAGACGCGTGCGGATGCGATGCGCAGGCGGCGCACTTCTGGCGAGCGAGCGTCAGCGTCGGTTGTCGACGGGCGACAAGGACATGAGGAAGGTGAGCCGGCCCTCGCGGCTGGTTGTTAAGCCTCTTGCTCGTATAGCCCGACGGCGACCGTGGCTCTGCGACGCGTGCCTGGCTGGTGACTCGTACGATCGGTCCGGCATGTCGACCGTGGCGGACGGCACGCCTGTGCGCTCAAACCGCTGCCRGTCGATCGCATGATGTTCACACACTACGCGTCGAGGAT…
McFadden & Brisson, submitted 2009	GQ377456.1	NA	Animalia	Cnidaria	Anthozoa	Malacalcyonacea	Alcyoniidae	Eleutherobia	Eleutherobia aurea	yes	0	NA	no	NA	NA	GAGAGTTAAAGAGCACGTGAAACCGTTGAAAGGGAAGCGAATGGAGTTAGCAATTCGCCGCGCCAGATTCAGTCTCTCGCGTTCCGCAGCGTGCGTGCTCTCGATCTTTGTAGACGAAACGCGATGCGCACGCGGGACGGGAGCGGCGCACTTCTGGCGGGCGAGCGTCAACGTCGATCGCCCGCGTGTCACAAGGCCGCGAGGAAGGTGAACCTCCCCACGGGGCGGTTSTTAAGCCTCGCTATCGCATGGCACGGGGGCGACCGTGGAACGCCGCGACGCGTGCCTTCCCTCGGAGGGGGCGAGCGGCTGGTGTCCTGTTCTGTCGAACCGGTTGTCGACCGTGGCGGACGGCTCGCCTGTGCGCACGAACCGCTGCCAGTCGACAGGGCGGTGATC…
Huang et al. 2011, BMC Evolutionary Biology	HQ203403.1	NA	Animalia	Cnidaria	Anthozoa	Scleractinia	Merulinidae	Astraeosmilia	Astraeosmilia tumida	no	NA	NA	no	NA	NA	GAGAGTTAAAAAGTATGTGAAACCGTCGGAAGGGAAACGAATGGACTCAGCAATGCGCCCCGCAAGATTCAGCCGGCGAGTGGCGGCGGCGCCGGGTCTGCGGATCCAAATGGAGTGCGGATCCAAATGGACCGCGGCCCGGCGCCCGCCTCCCCCCGCCGTCGCACTTCTCCGGGGCGCGCGTCAACGTGGGTCGGGACTGGGTCTGAAAGGTGCCAGGAAGGTAGGCGTGGGCCTCCGAGTCCCGCGCTSTTACAGCCCGGTTCTCTCCTGGCTCGGGCCCAACCGAGGAGGGCATGCCTCCTGTGGCTAGGGTCCCGTCCTTCCGGCCGGTTGTCCAGTGCGGTCAACTGCTTGCAGTGCTCCGCGACGGCTGCCGGTCGTTGGGGTGGTGATCTC…
McFadden & Ofwegen 2012, Zootaxa	JX124331.1	NA	Animalia	Cnidaria	Anthozoa	Malacalcyonacea	Capnellidae	Eunephthya	Eunephthya ericius	yes	0	NA	no	NA	NA	GAGAGTTAAAAAGTACGTGAAACCGTTGAAAGGGAAGCGAATGGAGTTAGCAATTCGCCCTGCCAGATTCAGCCGCTCGCACTTCGCGACGTGCGCGCTCTCGATCCGCATGGACGAGACGTGTGCGGGTGCGTTGTGCGGACGGCGCACTTCTGGCGAGCGAGCGTCAGCGTCGGTTGTCGGCGGGCGACAAGGACACAAGGAAGGTGGACCTGCCTCACGGCCGGTTGTTAAAGACTTGTGCTCACATAGCTCGACGGCGACCGTGGCCCTTGCGACGTGTGCTTGGCTGGCGACCCGACGATCGGTCCGGCATGTCGACCGTGGCGGACGGCACGCCTGTGCGCTCAAACTGCTGCCGGTCGATCGAGCGGTGCTCGCACACTACACGTCTAGGAT…
McFadden & Ofwegen 2012, Zootaxa	JX124332.1	NA	Animalia	Cnidaria	Anthozoa	Malacalcyonacea	Capnellidae	Eunephthya	Eunephthya ericius	yes	0	NA	no	NA	NA	GAGAGTTAAAAAGTACGTGAAACCGTTGAAAGGGAAGCGAATGGAGTTAGCAATTCGCCCTGCCAGATTCAGCCGCTCGCACTTCGCGACGTGCGCGCTCTCGATCCGCATGGACGAGACGTGTGCGGGTGCGTTGTGCGGACGGCGCACTTCTGGCGAGCGAGCGTCAGCGTCGGTTGTCGGCGGGCGACAAGGACACAAGGAAGGTGGACCTGCCTCACGGCCGGTTGTTAAAGACTTGTGCTCACATAGCTCGACGGCGACCGTGGCCCTTGCGACGTGTGCTTGGCTGGCGACCCGACGATCGGTCCGGCATGTCGACCGTGGCGGACGGCACGCCTGTGCGCTCAAACTGCTGCCGGTCGATCGAGCGGTGCTCGCACACTACACGTCTAGGAT…
McFadden & Ofwegen 2012, Zootaxa	JX124333.1	NA	Animalia	Cnidaria	Anthozoa	Malacalcyonacea	Capnellidae	Eunephthya	Eunephthya granulata	yes	0	NA	no	NA	NA	GAGAGTTAAAAAGTACGTGAAACCGTTGAAAGGGAAGCGAATGGAGTTAGCAATTCGCCCTGCCAGATTCAGCCGCTCGCGCTTCGCGACGTGCGCGCTCTCGATCCGCATGGACGAGACGTGTGCGGGCGCGTCGTGCGGACGGCGCACTTCTGGCGAGCGAGCGTCAGCGTCGGTTGTCGGCGGGCGACAAGGACACGAGGAAGGTAGACCGGCCTAACGGTTGGTTGTTAAGACTCGTGCTCGTATAGCTCGACGGCGACCGTGGCCCTGCGACGTGTGCTTGGCTGGCGACCCGACGATCGGTCCGGCATGTCGACCGTGGCGGACGGCACGCCTGTGCGCTCAAACTGCTGCCGGTCGATCGAACGGTGTTCGCACASTACGCGTCTAGGATGC…
McFadden & Ofwegen 2012, Zootaxa	JX124334.1	NA	Animalia	Cnidaria	Anthozoa	Malacalcyonacea	Capnellidae	Eunephthya	Eunephthya shirleyae	yes	0	NA	no	NA	NA	GAGAGTTAAAAAGTACGTGAAACCGTTGAAAGGGAAGCGAATGGAGTTAGCAATTCGCCCTGCCAGATTCAGCCGCTCGCACTTCGCGACGTGCGCGCTCTCGATCCGCATGGACGAGACGTGTGCGGGTGCGTTGTGTGGACGGCGCACTTCTGGCGAGCGAGCGTCAGCGTCGGTTGTCGGCGGGCGACAAGGCCACAAGGAAGGTAGACCAGCCTCACGGCCGGTTGTTAAGACTTGTGCTCACATAGCTCGACGGCGACCGTGGCCCTGCGACGTGTGCTTGGCTGGCGACCCGACGATCGGTCCGGCATGTCGACTGTGGCGGACGGCACGCCTGTGCGCTCGAACTGCTGCCGGTCGATCGGACGGTGCTCGCACACTACGCGTCTAGGATGC…
McFadden & Ofwegen 2012, Zootaxa	JX124335.1	NA	Animalia	Cnidaria	Anthozoa	Malacalcyonacea	Capnellidae	Eunephthya	Eunephthya shirleyae	yes	0	NA	no	NA	NA	GAGAGTTAAAAAGTACGTGAAACCGTTGAAAGGGAAGCGAATGGAGTTAGCAATTCGCCCTGCCAGATTCAGCCGCTCGCACTTCGCGACGTGCGCGCTCTCGATCCGCATGGACGAGACGTGTGCGGGTGCGTTGTGTGGACGGCGCACTTCTGGCGAGCGAGCGTCAGCGTCGGTTGTCGGCGGGCGACAAGGCCACAAGGAAGGTAGACCAGCCTCACGGCCGGTTGTTAAGACTTGTGCTCACATAGCTCGACGGCGACCGTGGCCCTGCGACGTGTGCTTGGCTGGCGACCCGACGATCGGTCCGGCATGTCGACTGTGGCGGACGGCACGCCTGTGCGCTCGAACTGCTGCCGGTCGATCGGACGGTGCTCGCACACTACGCGTCTAGGATGC…
McFadden & Ofwegen 2012, Zootaxa	JX124338.1	NA	Animalia	Cnidaria	Anthozoa	Malacalcyonacea	Capnellidae	Eunephthya	Eunephthya susanae	yes	0	NA	no	NA	NA	GAGAGTTAAAAAGTACGTGAAACCGTTGAAAGGGAAGCGAATGGAGTTAGCAATTCGCCCTGCCAGATTCAGCCGCTCGCACTTCGCGACGTGCGCGCTCTCGATCCGCATGGACGAGACGTGTGCGGGTGCGTTGTGTGGACGGCGCACTTCTGGCGAGCGAGCGTCAGCGTCGGTTGTCGGCGGGCGACAAGGACACAAGGAAGGTAGACCTGCCTCACGGCCGGTTGTTAAGACTTGTGCTCACATAGCTCGACGGCGACCGTGGCCCTGCGACGTGTGCTTGGCTGGCGACCCGACGATCGGTCCGGCATGTCGACTGTGGCGGACGGCACGCCTGTGCGCTCGAACTGCTGCCGGTCGATCGAACGGTGCTCGCACACTACGCGTCTAGGATGC…
McFadden & Ofwegen 2012, Zootaxa	JX124339.1	NA	Animalia	Cnidaria	Anthozoa	Malacalcyonacea	Capnellidae	Eunephthya	Eunephthya thyrsoidea	yes	0	NA	no	NA	NA	GAGAGTTAAAAAGTACGTGAAACCGTTGAAAGGGAAGCGAATGGAGTTAGCAATTCGCCCTGCCAGATTCAGCCGCTCGCGCTTCGCGACGTGCACGCTCTCGATCCGCATGGACGAGACGTGTGCGGGTGCGTGGTGCGGACGGCGCACTTCTGGCGAGCGAGCGTCAGCGTCGGTTGTCGGCGGGCGACAAGGGCACAAGGAAGGTAGACTGGCCTAACGGCTGGTTGTTAAGACTTGTGATCGTATAGCCCGACGGCGACCGTGGCCCTGCGACGTGTGCTTGGCTGGCGACCCGACCGATCGGTCCGGCATGTCGACCGTGGCGGACGGCACGCCTGTGCGCTCAAACTGCTGCCGGTCGATCGACGGCGTTCGCACACTACGCGTCTAGGATGC…
McFadden & Ofwegen 2012, Zootaxa	JX124341.1	NA	Animalia	Cnidaria	Anthozoa	Malacalcyonacea	Capnellidae	Eunephthya	Eunephthya thyrsoidea	yes	0	NA	no	NA	NA	GAGAGTTAAAAAGTACGTGAAACCGTTGAAAGGGAAGCGAATGGAGTTAGCAATTCGCCCTGCCAGATTCAGCCGCTCGCGCTTCGCGACGTGCACGCTCTCGATCCGCATGGACGAGACGTGTGCGGGTGCGTGGTGCGGACGGCGCACTTCTGGCGAGCGAGCGTCAGCGTCGGTTGTCGGCGGGCGACAAGGGCACAAGGAAGGTAGACTGGCCTAACGGCTGGTTGTTAAGACTTGTGATCGTATAGCCCGACGGCGACCGTGGCCCTGCGACGTGTGCTTGGCTGGCGACCCGACCGATCGGTCCGGCATGTCGACCGTGGCGGACGGCACGCCTGTGCGCTCAAACTGCTGCCGGTCGATCGACGGCGTTCGCACACTACGCGTCTAGGATGC…
McFadden & Ofwegen 2012, Zootaxa	JX124342.1	NA	Animalia	Cnidaria	Anthozoa	Malacalcyonacea	Capnellidae	Eunephthya	Eunephthya thyrsoidea	yes	0	NA	no	NA	NA	GAGAGTTAAAAAGTACGTGAAACCGTTGAAAGGGAAGCGAATGGAGTTAGCAATTCGCCCTGCCAGATTCAGCCGCTCGCGCTTCGCGACGTGCGCGCTCTCGATCCGCATGGACGAGACGTGTGCGGGCGCGTGGTGCGGACGGCGCACTTCTGGCGAGCGAGCGTCAGCGTCGGTTGTCGGCGGGCGACAAGGGCACAAGGAAGGTAGACTGGCCTAACGGCTGGTTGTTAAGACTTGTGATCGTATAGCCCGACGGCGACCGTGGCCCTGCGACGTGTGCTTGGCTGGCGACCCGACGATCGGTCCGGCATGTCGACCGTGGCGGAMGGSACGCCTGTGCGCTCAAACTGCTGCCGGTCGATCGGACGGCGTTCGCACACTACGCGTCTAGGATGC…
McFadden & Ofwegen 2012, Zootaxa	JX124343.1	NA	Animalia	Cnidaria	Anthozoa	Malacalcyonacea	Capnellidae	Capnella	Capnella sp.	yes	0	NA	no	NA	NA	GAGAGTTAAAAAGTACGTGAAACCGTTGAAAGGGAAGCGAATGGAGTTAGCAATTCGCCCTGCCAGATTCAGCTGCTCGCGCTCCGCGACGTGCGCGCTCTCGATCCGCATGGACGAGACGTGTGCGGGCGCGTTGTGCGGACGGCGCACTTCTGGCGAGCGAGCGTCAGCGTCGGTTGTCTGCGTGCGACAAGGACACGAGGAAGGTGGACTGGCCTCACGGCCGGTTGTTAAGACTCGTGCTCGCATAGCTCGACGGCGACCGTGGCCCTGCGACGTGTGCTTGGCTGGCGACCCGAACTATCGGTCCGGCATGTCGACCGTGGCGGACGGCACGCCTGTGCGCTCAAACTGCTGCCGGTCGATGGGACGGTGTTCGCACACTACGCGTCTAGGATG…
McFadden & Ofwegen 2012, Zootaxa	JX124344.1	NA	Animalia	Cnidaria	Anthozoa	Malacalcyonacea	Capnellidae	Capnella	Capnella cf. spicata	yes	0	NA	no	NA	NA	GAGAGTTAAAAAGTACGTGAAACCGTTGAAAGGGAAGCGAATGGAGTTAGCAATTCGCCCTGCCAGATTCAGCTGCCCGTGCTTCGCGACGTGCGCGCTTTCGATCCGCATGGACGAGACGTGTGCGGGTGCGTTGTGCGGACGGCGCACTTCTGGCGAGCGAGCGTCAGCGTCGGTTGTCTGCGGGCGAYAAGGACACGAGGAAGGTAGACCGATCTTACACGGCCGGTTGTTAAGACTCGTGATCGCATAGCTCGACGGCGACCGTGGCCCTGCGACGTGTGCYTGGCTGGCGACCCGACCGATCGGTYCGGCATGTCGACTGTGGCGGACGGCACGCCTGTGCGCTCAAACTGCTGCCAGTCGATCGGATGGTGTTCGCACACTACGCGTCTAGGA…
McFadden & Ofwegen 2012, Zootaxa	JX124345.1	NA	Animalia	Cnidaria	Anthozoa	Malacalcyonacea	Capnellidae	Capnella	Capnella cf. spicata	yes	0	NA	no	NA	NA	GAGAGTTAAAAAGTACGTGAAACCGTTGAAAGGGAAGCGAATGGAGTTAGCAATTCGCCCTGCCAGATTCAGCYGCCCGTGCTTCGCGACGTGCGCGCTTTCGATCCGCATGGACGAGACGTGTGCGGGTGCGTTGTGCGGACGGCGCACTTCTGGCGAGCGAGCGTCAGCGTCGGTTGTCTGCGGGCGACAAGGACACGAGGAAGGTAGACCGATCTTACACGGCCGGTTGTTAAGACTCGTGATCGCATAGCTCGACGGCGACCGTGGCCCTGCGACGTGTGCTTGGCTGGCGACCCGACCGATCGGTCCGGCATGTCGACCGTGGCGGACGGCACGCCTGTGCGCTCAAACTGCTGCCAGTCGATCGGATGGTGTTCGCACACTACGCGTCTAGGA…
McFadden & Ofwegen 2012, Zootaxa	JX124346.1	NA	Animalia	Cnidaria	Anthozoa	Malacalcyonacea	Paralcyoniidae	Ceeceenus	Ceeceenus quadrus	yes	0	NA	no	NA	NA	GAGAGTTAAAAAGTACGTGAAACCGTTGAAAGGGAAGCGAATGGAGTTAGCAATTCGCCCAGCCAGATTCAGTTGTTTGTGCCTCGCGACGTGCGCGCTCTCGATCCGCATGGACGAGACGTGTGCGGGTGCGATGTGCGAACGGCGCACTTCTGGCGAGCGAGCGTCAGCGTCGGTTGTCGGCGGGCGACAAGGTCACATGGAAGGTGGACTGGCCTCACGGCCGGTTGTTAAGACATGTGCTCGTATAGCTCGACTGCGACCGTGGCTCTGCGACGTGTGCTTGGCTGGCGACCCGAACGATCGGTCCGGCATGTCGACCGTGGTGGACGGCACGCCTGTGCGCTCAAACTGCTGCCGGTCGATCGGACGGTGTTCGCACACTACGCGTCTAAGATG…
McFadden & Ofwegen 2012, Zootaxa	JX124347.1	NA	Animalia	Cnidaria	Anthozoa	Malacalcyonacea	Paralcyoniidae	Paralcyonium	Paralcyonium spinulosum	yes	0	NA	no	NA	NA	GAGAGTTAAAAAGTACGTGAAACCGTTGAAAGGGAAGCGAATGGAGTTAGCAATTCGCCCTGCCAGATTCAGTTGCTCGCGCCTCGCGACGTGCGCGCTCTCGATCCGCATGGACGAGACGTGTACGGGTGCGATGTGCGGACGGCGCACTTCTGGCGAGCGAGCGTCAGCGTCGGTTGTCGGCGGGCGACAAGGCCACATGGAAGGTGGACTGGCTTCGCGGCCGGTTGTTAAGACATGTGGACGTATAACTCGACGGCGACCGTGGCTCTGCGACGTGTGCCTGGCTGGCGACCCGAACTATCGGTCCGGCATGTCGACCGTGGCGGACGGCACGCCTGTGCGCTCAAACTGCTGCCGGTCGATTGGACGGTGTTCGCACACTACGCGTCTAAGATG…
McFadden & Ofwegen 2012, Zootaxa	JX124348.1	NA	Animalia	Cnidaria	Anthozoa	Malacalcyonacea	Paralcyoniidae	Studeriotes	Studeriotes sp.	yes	0	NA	no	NA	NA	GAGAGTTAAAAAGTACGTGAAACCGTTGAAAGGGAAGCGAATGGAGTTAGCAATTCGCCCTGCCAGATTCAGTTGTCCGTGCCTCGCGACGTGCGCGCTCTCGATCCGCATGGACGAGACGTGTGCGGGTGCGAAGCGTGGACGGCGCACTTCCGGCGGGCGAGCGTCAGCGTCGGTTGTCGTCGGGCGACAAGGTCACGCGGAAGGTGCATCGGCCTCGCGGCCGGTTGTTAAAGACGCGTGCTCGTACGGCTCGACGGCGACCGTGGCTCCGCGACGCGTGCCTGGCTGGCGACCCGAACGATCGGTCCGGCATGTCGACCGTGGCGGACGGCACGCCTGTGCGCTCGAACCGCTGTCGGTCGATCGGACGGTGTTCGCACACTACGCGTCTAGGAT…
McFadden & Ofwegen 2012, Zootaxa	JX124349.1	NA	Animalia	Cnidaria	Anthozoa	Malacalcyonacea	Nephtheidae	Dendronephthya	Dendronephthya sinaiensis	yes	0	NA	no	NA	NA	GAGAGTTAAAAAGTACGTGAAACCGTTGAAAGGGAAGCGAATGGAGTTAGCAATTCGCCCCGCCAGATTCAGTCGCTCGCGCATCGCGACGGTCGCGCTCTCGATCCGCATGGACGAGGCGCGCTCGGACGCGGTGCGCGGACGGCGCACTTCTGGCGAGCGAGCGTCAGCGTCGGTTGTCGACGGGCGATAAGGTCGCAAGGAAGGTGGACCGGCCTCGCGGCTGGTTGTTAAGACTTGCGCTCGCATAGCTCGTCGGCGACCGTGGTCTGCGGCGCGTGCTCGGCTGGCGACCCGACCGATCGGTCCGGCATGTCGACCGTGGCGGACGGCACGCCTGTGCGCTCGAACCGCTGCCTGTCGATCGTGACGGTGTTCGCACACTACGCGCCTAGGATG…
McFadden & Ofwegen 2012, Zootaxa	JX124350.1	NA	Animalia	Cnidaria	Anthozoa	Malacalcyonacea	Nephtheidae	Scleronephthya	Scleronephthya corymbosa	yes	0	NA	no	NA	NA	GAGAGTTAAAAAGTACGTGAAACCGTTGAAAGGGAAGCGAATGGAGTTAGCAATTCGCCCTGCCAGATTCAGTTGCTCGCGCAGCGCGACGCACGCGCTCTCGATCCGCATGGACGAGACGCGTGCGGGCGCGCTGTGCGGACGGCGCACTTCTGGCGAGCGAGCGTCAGCGTCGGTTGTCGTCGGGCGACAAGGACACGAGGAAGGTGGATCGGCCTCGCTGCCGGTTGTTAAGCCTCGTGCTCGTACAGCTCGACGGCGACCGTGGAACAAGCGCGACGCGTGCCTGGCTGGCGACTCGAACGATCGGTCCGGCATGTCGACCGTGGCGGACGGCACGCCTGTGCGCTCAAACTGCTGCCGGTCGATCGGACGGTGTTCGCACACTACGCGTCAAGG…
McFadden & Ofwegen 2012, Zootaxa	JX124351.1	NA	Animalia	Cnidaria	Anthozoa	Malacalcyonacea	Nephtheidae	Stereonephthya	Stereonephthya cundabiluensis	yes	0	NA	no	NA	NA	GAGAGTTAAAAAGTACGTGAAACCGTTGAAAGGGAAGCGAATGGAGTTAGCAATTCGCCCCGCCAGATTCAGTCGCTCGCGCTGTGCGACGGCCGCGCTCTCGATCCGCATGGACGAGRCGCGTTCGGACGCGCCGTGCGGGCGGCGCACTTCTGGCGAGCGAGCGTCAGCGTCGGTTGTCGTCGGGCGACAAGGTCGCGAGTAAGGTGGACCGTCCTTCGGGCCGGTTGTTACAGACTCGCGTTCGTACAGCTCGGCGGCGACCGTGGCCCCTGCGACGCGTGCTTGGCTGGCGACCCGATCGATCGGTACGGCATGTCGACCGTGGCGGACGGCACGCCTGTGCGCTCGAACTGCTGCCTGCCGATCGTAACGGTGTTCGCACACTACGCGCCTAGG…
Reijnen et al. 2014, Molecular Phylogenetics & Evolution	KC845912.1	NA	Animalia	Cnidaria	Anthozoa	Malacalcyonacea	Melithaeidae	Melithaea	Melithaea sp.	yes	0	NA	no	NA	NA	GAGAGTTAAAAAGTACGTGAAACCGTTGAAAGGGAAGCGAATGGAGTTAGCAATTCGCCCTGTCAGACTCAGCCGCTCGCGAGTAGCGACGTGCGCGCTCTCGATCCCTATAGACGAGGCGCGTGCGGGTGCGACTTGCGGACGGCGCACTTCTGGCGGGCGAGCGTCAGCGTCGGTTGTGGACGGGCGAGAAGGTCGCGAGGAAGGTGGATCGGCCTCACGGCCGGTTGTTAAGCCTCGCGCTCGTACGGCCCGACTACGACCGTGGCTCTTGGAGGCGACGCGTGCCTGGCTGGCGACTCACTCGATCGGTCCGGCATGTCGACCGTGGCGGACGGCACGCCTGTGCGCTCGAACTGCTGCCGGTCGATCGGATGATGTTCGCACACTACGCGTCGA…
Reijnen et al. 2014, Molecular Phylogenetics & Evolution	KC845913.1	NA	Animalia	Cnidaria	Anthozoa	Malacalcyonacea	Melithaeidae	Melithaea	Melithaea sp.	yes	0	NA	no	NA	NA	GAGAGTTAAAAAGTACGTGAAACCGTTGAAAGGGAAGCGAATGGAGTTAGCAATTCGCCTTGTCAGACTCAGCCGCTCGCAAGAAGCGACGTGCGCGTTCTCGATCCCTATAGACGAGGCGCGTGTGGGTGCGACTTGTGGACGGCGCACTTCTGGCAGGCGAGCGTCAGCGTCGGTTGTGGACGGGCAAGAAGGTTGCGAGGAAGGTGGATCGGCTTTACGGCCGGTTGTTAAGCCTCGTGCTCGTACGGCCCGACAACGACTGTGGCTCTTGGAGGCGACGCGTGCCTGGCTGGCGACTCACTCGATCGGTCCGACATGTCGACTGTGGCGGACGGCACGCCTGTGCGCTCGAACTGCTGCCGGTCGATCGGATGATGTTCGCACACTACGCGTCGA…
Brugler et al. 2013, Zoological Journal of the Linnean Society	KF054361.1	NA	Animalia	Cnidaria	Anthozoa	Antipatharia	Aphanipathidae	Aphanipathes	Aphanipathes verticillata mauiensis	yes	0	NA	no	NA	NA	GAGAGTTAAAAAGTACGTGAAACCGTTGAAAGGGAAACGAATGGAGCTAGCAATGCACCCTGCGAGATTCAGCCTGTGGGTGGCGAGGGCGTCGGGTTTGCAGATCTGAATCGACTGCGGCCCGGCGGTTCTCTCCCCCCGCCGTCGCACTTCTCGCGGGTGCGCGTCAACATGGGTCGGGAGCGGGTCTTAGAGGCGCCGGCAAGGTAGGTCCCACCCCCCGGGGTGGGACTGTTTAGGCCGGCGTTTTCGCGGCTCGCGCCCGATCGAGGTGCCGCAGCACATGCCTCTTGTGGCTGGGGTCCCGTCTCTCCGGTTGGTTGTCGACCGTGGTGGACTGCTTGCAGTGCACCGCGACTGCTGCCGGTCGCTGGGGCGGTGACTTCGCACCATGTGCTT…
Shemesh et al. 2013, Unpublished	KF147535.1	NA	Animalia	Cnidaria	Anthozoa	Antipatharia	Leiopathidae	Leiopathes	Leiopathes sp.	NA	NA	NA	no	NA	NA	GAGAGTTAAAAAGTACGTGAAACCGTTAAAAGGGAAACGAATGGAGCTAGCAATGCGCCCTGTGAGATTCAGCCGGCCGGTGGTCCAGGCGCGTGGCTTGCAGATCTGAATTGACTGCGGCCGCGTGGTTTGGGCTCCCGACCGTCGCACTTCTTGCGGGCGCGCGTCAACATGGGTTGGGAGTGGGTCTGAAAGGCACCGGGAAGGTAGGTCCGACCCCTCGGGGCTGGTCTGTTATAGTCCGGTGTTCTCATGGCTCGCGCCCGACCGAGGAGTTGCAGCACATGCCTCTTGTGGCTGGGGTCCCGTCGTTCCGGTTGGTTGTCGACGGCGGTGGACTGCGTGCAGTGCACCGCGACTGCTGCCGGTCGCTACGGTGGTGACTTCGCACCATGTGCT…
Rodriguez et al. 2014, PLoS One	KJ411643.1	NA	Animalia	Cnidaria	Anthozoa	Malacalcyonacea	Gorgoniidae	Antillogorgia	Antillogorgia bipinnata	yes	0	NA	no	NA	NA	GAGAGTTAAAAAGTACGTGAAACCGTTGAAAGGGAAGCGAATGGAGTTAGCAATTCGCCCTGCCAGATTCAGTTGTTCGCGCATCGCGACGCGCACGCCCTCGATCCGCATGGACGAGGCGTGCGCGGACGCGAAGCGTGGGCGGCGCACTTCTGGCGAGCGAGCGTCAGCGTCGGTTGCCGACGGGCGACAAGGACATGAGGAAGGTGAACCGGCCTCACCGCCGGTTGTTAAGCCTCTTGCTCGTATAGCCCGCCGCCGACCGTGGCTCTGCGACGCGTGCCTGGCTGGTGACTCGTGCGATCGGTTCGGCATGTCGACCGTGGCGGACGGCACGCCTGTGCGCTCAAACTGCTGCCGGTCGATTGCGTGATGCTCACACACTACGCGTCGAGGATG…
Taylor & Rogers 2015, Molecular Phylogenetics & Evolution	KP324524.1	NA	Animalia	Cnidaria	Anthozoa	Scleralcyonacea	Primnoidae	Thouarella	Thouarella cf. variabilis	yes	0	NA	no	NA	NA	GAGAGTTAAAAAGTACGTGAAACCGTTGAAAGGGAAGCGAATAGAGATAGAAATTCCTGGGCGTGCTTGGTTTCGATCTTTACAGACGAGCCTTGTACGCATGCGTTGCGTGACCGGTGCACTTCCGCTTGGCGAATGTCAACGTCGGTTTGCGTGGCGTCAAAAAGCCGCATGCACGGTAGGTCTCACGGGATCGGTAAGGCTTGCGTGCAAACAACTCCATGTAGACCGAGTTCTGTCGCAGCACGTACCTGAAGGTTGATGTCCTCATCGTTATGTCGGTTTTCCGTCGCTTGGCGGACGGCTTTGCCTGTGCGTCAAGTGCGGCCGTTCAGACGATGGGCAATACATACACGACGTGCTGAGGACGTTGACGTATCTGCGCCTCTATCCGACCCG…
Taylor & Rogers 2015, Molecular Phylogenetics & Evolution	KP324525.1	NA	Animalia	Cnidaria	Anthozoa	Scleralcyonacea	Primnoidae	Mirostenella	Mirostenella articulata	yes	2	33, 34	no	NA	NA	GAGAGTTAATAAGTACGTGAAACCGTTGNAAGAAGCGAATGAGCAATTCTCCCTGTCGTGCTTGGTTTCGATCTTTCCAGACGAGCCTTGCGTGCATGCGTCGCATGGCCGGTGCACTTCTGCTGGGAGACAGTCAACGTCGGTTTGCGTGTGCCCAAAACGCCGCGAGCACGGTAGGTCTCTCGGGATCGGTAAGGCTTGCGTGCAAATGACTACATGCAGACCGAGTTGCAGTCGCAGCACGTACCTGCAGGTTGATGTCTTCGTCGTTGTGTCGGTTTACTGTCGCCAACGGACGGCATTGCCAGTGCGTTTGGGTGCGGCCGTTCACACGACGGGGCTAACAGACACCACGTGCTGAGGGCGTTGACAATTCTGCGCCTCTATCCGACCCGTCTT…
Taylor & Rogers 2015, Molecular Phylogenetics & Evolution	KP324526.1	NA	Animalia	Cnidaria	Anthozoa	Scleralcyonacea	Primnoidae	Mirostenella	Mirostenella articulata	yes	0	NA	no	NA	NA	GAGAGTTAAAAAGTACGTGAAACCGTTGAAAGGGAAGCGAATAGAGTGAGCAATTCTCCCTGGCGTGCTCGATCTTTCCAGACGAGCCTTGTGCGCATGCGTCGCGTGGACGGTGCACTTCTGCTGGGAGAAAGTCAACGTCGGTTTGCGTGTGCTCAAAATGCCGCGAGCACGGTAGGTCTCTCGGGATCGGTAAGGCTTGCGTGCGGATAACTACATGCAGACCGAGTTGCAGTCGCAGCACGTACCTGCAGGTTGATGTCTTCGTCGTTGTATCGGTTTACTGTCGCCAAACGGACGGCATTGCCAGTGCGTTTGGGTGCGGCCGTTCACACGACGGGGCTAACAGACACCACGTGCTGAGGGCGTTGACAATTCTGCGCCTCTATCCGACCCGTC…
Taylor & Rogers 2015, Molecular Phylogenetics & Evolution	KP324528.1	NA	Animalia	Cnidaria	Anthozoa	Scleralcyonacea	Primnoidae	Thouarella	Thouarella viridis	yes	0	NA	no	NA	NA	GAGAGTTAAAAAGTGCGTGAAACCGTTGGAAGGGAAGCGAATAGAGATAGAAATTATCCTGGTCGTGCTCGGTTTCGATCTTTACAGACGAGCCTTGTACGCTTGCGTTGCGTGACCGGTGCACTTCCGCTTGGCGAATGTCAACGTCGGTTTGCGTGGAGTGAAAAAGCCGCATGCACGGTAGGTCCCACGGGATCGGTAAGGCTTGCGTGCAATCGACTCCATGTAGACCGAGTTCTGTCGCAGCACGTACCTAAGGTTGATGTCCTCATCGTTATGTCGGTTTACCGTCGCTTGGCGGACGGCTTTGCCTGTGCGTTTAAGTGCGGCCGTTTAGACGATGCGCAATACATACACGACGTGCTGAGGACGTTGACGAGTCTGCGCCTCTATCCGACC…
Taylor & Rogers 2015, Molecular Phylogenetics & Evolution	KP324529.1	NA	Animalia	Cnidaria	Anthozoa	Scleralcyonacea	Primnoidae	Dasystenella	Dasystenella austasensis	yes	0	NA	no	NA	NA	GAGAGTTAAAAAGTGCGTGAAACCGCTGGAAGGGAAGCGAATGGAGTCGGCAATTCGCCTCGGCGCGTTCGATCTTTCTAGACGAAGCTTGCGCACGTGCGTCGCGCAACCGGTACTTCCGCTTGGCGAAAGTCAACGTCGGTTGCGCGGAGTCAAAAAGCCGCGAGCACGGTAGGTCGCTCGCGATGCTTGCGAGCGAACGGCTTCACGTTGACCGAGTTAAGTCGCAGCACGTACCTGCAGGTTGATGTCTTCGTAGCTGAGTAGGTTTAACCTCGCCGCGCGGACGGCTTTGCCTGTGCGTCGGCGAGCGACCTGTCAAGCCACGGAGGAAGCAGACACGACGTGCTGAGCACGTTGGCTGCCCACCGGCTCCATCCGACCCGTCTTGAAACACGG…
Taylor & Rogers 2015, Molecular Phylogenetics & Evolution	KP324530.1	NA	Animalia	Cnidaria	Anthozoa	Scleralcyonacea	Primnoidae	Thouarella	Thouarella chilensis	yes	0	NA	no	NA	NA	GAGAGTTAAAAAGTGCGTGAAACCGTTGGAAGGGAAGCGAATAGAGATAGAAATTCTTGGTCGTGCTCGGTTTCGATCTTTATAGACGAGCCTTGTACGCTTGCGTTGCGTGACCGGTGCACTTCCGCTTGGCGAATGTCAACGTCGGTTTGCGTGGAGTGAAAAAGCCGCATGCACGGTAGGTCCCACGGGATCGGTAAGGCTTGCGTGCAATCGACTCCACATAGACCGAGTTCTGTCGCAGCACGTACCTGAAGGTTGATGTCCTCATCGTTATGTCGGTCTACCGTCGCTTGGCGGACGGCTTTGCCTGTGCGTTTAAGTGCGGCCGTTTAGACGATGTGCAATACATACACGACGTGCTGAGGACGATGACGATTCTGCGCCTCTATCCGACCC…
Taylor & Rogers 2015, Molecular Phylogenetics & Evolution	KP324531.1	NA	Animalia	Cnidaria	Anthozoa	Scleralcyonacea	Primnoidae	Primnoella	Primnoella antarctica	yes	0	NA	no	NA	NA	GAGAGTTAAAAAGTGCGTGAAACCGTTGGAAGGGAAGCGAATAGAGCTTGCAATTCGCCTTGTCGTGCTCGATCTTTCTAGACGAGGCGTGCGCGTATGCGATGCGCGATCGGTGCACTTCCGCTAGGCGAAAGTCAACGTCGGTTTTGGCAAAGTCAAAAAGCAGCGAGCACGGTAGATCTCTCGGGATCGGTAAGGCTTGCGTGCAAATGGCTTTGTTGAGACCGAGTTGGGTCGCAGCACGTACCTGTTGGTTGATGTCTTCGTCGTTGAGTTGGTTTTACGTCGCTCGGCGGACGGCTTCGCCTGTGCGTCGGCGTGCGGCCGCTGAAACGATGTTGAACGTATACACCACGTGCTAAGGACGTTGACTATGCGGCGGCTCTATCCGACCCGTCT…
Taylor & Rogers 2015, Molecular Phylogenetics & Evolution	KP324532.1	NA	Animalia	Cnidaria	Anthozoa	Scleralcyonacea	Primnoidae	Thouarella	Thouarella variabilis	yes	0	NA	no	NA	NA	GAGAGTTAAAAAGTACGTGAAACCGTTGAAAGGGAAGCGAATAGAGATAGAAATTCCTCTGGGCGTGCTCGATCTTTATAGACGAGCCTTGTACGCTTGCGTCGCGTGACCGGTGCACTTCCGCTTGGCGAATGTCAACGTCGGTTTGGGTGGCGTCAAAAAGTCGCATGCGCGGTAGGTCTCACGAGATCGGTAAAGCTTGCGTGCAAACGACTCCATGCAGACCGAATTCTGTCGCAGCACGTACCCGAAGGTTGATGTCCTCATCGTTATGTCGGTTTACCGACGCTTGACGGACGGCTTTGCCCGTGCGTCNAAGTGCGGCCGTTTAGACGATGGGAAATACATACACTACGTGCTGAGGACGTTGACGATTCTGCGCCTCTATCCGACCCGTCT…
Taylor & Rogers 2015, Molecular Phylogenetics & Evolution	KP324533.1	NA	Animalia	Cnidaria	Anthozoa	Scleralcyonacea	Primnoidae	Thouarella	Thouarella antarctica	yes	0	NA	no	NA	NA	GAGAGTTAAAAAGTGCGTGAAACCGTTGGAAGGGAAGCGAATAGAGATAGAAATTCTCCTGGTCGTGCTCGGTTTCGATCTTTATAGACGAGCCTTGTACGCTTGCGTTGCGTGACCGGTGCACTTCCGCTTGGCGAATGTCAACGTCGGTTTGCGTGGAGTGAAAAAGCCGCATGCACGGTAGGTCCCACGGGATCGGTAAGGCTTGCGTGCAATCGACTCCACATAGACCGAGTTCTGTCGCAGCACGTACCTGAAGGTTGATGTCCTCATCGTTATGTCGGTCTACCGTCGCTTGGCGGACGGCTTTGCCTGTGCGTTTAAGTGCGGCCGTTTAGACGATGTGCAATACATACACGACGTGCTGAGGACGTTGACGATTCTGCGCCTCTATCCGAC…
Taylor & Rogers 2015, Molecular Phylogenetics & Evolution	KP324534.1	NA	Animalia	Cnidaria	Anthozoa	Scleralcyonacea	Primnoidae	Thouarella	Thouarella diadema	yes	0	NA	no	NA	NA	GAGAGTTAAAAAGTACGTGAAACCGTTGGAAGGGAAGCGAATAGAGATAGAAATTCCTCGGCGTGCTTGGTTTCGATCTTTATAGACGAGCCTTGTACGCTTGCGTTGCGTGACCGGTGCACTTCCGCGTGGCGAATGTCAACGTCGGTTTGCGTGGTGCCAAAAAGCCGCATGCACGGTAGGTCTCACGGGATCGGTAAGGCTTGCGTGCAAACGACTCCATGTAGACCGAATTCTGTCGCAGCACGTACCTGAACGTTGATGTCCTCATCGTTATGTCGGTTTACCGTCGCTTGGCGGACGGCTTTGCCTGTGCGTTCAAGTGCGGCCGTTTAGACGATGGGAAATACATACACGACGTGCTGAGGACGTTGACGATTCTGCGCCTCTATCCGACCC…
Taylor & Rogers 2015, Molecular Phylogenetics & Evolution	KP324535.1	NA	Animalia	Cnidaria	Anthozoa	Scleralcyonacea	Primnoidae	Mirostenella	Mirostenella articulata	yes	1	34	no	NA	NA	GAGAGTTAAAAAGTACGTGAAACCGTTGAAAGGAAAGCGAATAGAGTGAGCAATTCTCCCTGGCGTGCTTGGTTTCGATCTTTCCAGACGAGCCTTGTGCGCATGCGTCGCGTGGACGGTGCACTTCTGCTGGGAGAAAGTCAACGTCGGTTTGCGTGTGCTCAAAATGCCGCGAGCACGGTAGGTCTCTCGGGATCGGTAAGGCTTGCGTGCGGATAACTACATGCAGACCGAGTTGCGTCGCAGCACGTACCTGCAGGTTGATGTCTTCGTCGTTGTATCGGTTTACTGTCGCCAAACGGACGGCATTGCCAGTGCGTTTGGGTGCGGCCGTTCACACGACGGGGCTAACAGACACCACGTGCTGAGGGCGTTGACAATTCTGCGCCTCTATCCGAC…
Taylor & Rogers 2015, Molecular Phylogenetics & Evolution	KP324536.1	NA	Animalia	Cnidaria	Anthozoa	Scleralcyonacea	Primnoidae	Mirostenella	Mirostenella articulata	yes	0	NA	no	NA	NA	GAGAGTTAAAAAGTACGTGAAACCGTTGAAAGGGAAGCGAATAGAGTGAGCAATTCTCTGGCGTGCTTGGTTTCGATCTTTCCAGACGAGCCTTGTGCGCATGCGTCGCGTGGACGGTGCACTTCTGCTGGGAGAAAGTCAACGTCGGTTTGCGTGTGCTCAAAATGCCGCGAGCACGGTAGGTCTCTCGGGATCGGTAAGGCTTGCGTGCGGATAACTACATGCAGACCGAGTTGCGTCGCAGCACGTACCTGCAGGTTGATGTCTTCGTCGTTGTATCGGTTTACTGTCGCCAAACGGACGGCATTGCCAGTGCGTTTGGGTGCGGCCGTTCACACGACGGGGCTAACAGACACCACGTGCTGAGGGCGTTGACAATTCTGCGCCTCTATCCGACCC…
Taylor & Rogers 2015, Molecular Phylogenetics & Evolution	KP324537.1	NA	Animalia	Cnidaria	Anthozoa	Scleralcyonacea	Primnoidae	Mirostenella	Mirostenella sp.	yes	0	NA	no	NA	NA	GAGAGTTAAAAAGTACGTGAAACCGTTGAAAGGGAAGCGAATAGAGTGAGCAATTCTCCCTGGCGTGTTCGATCTTTCTAGACGAGCCTTGTGCGCATGCGTCGCGTGTCCGGTGCACTTCTGCTGGGAGAAAGTCAACGTCGGTTTGCGTGTGCTCAAAACGCCGCGAGCACGGTAGGTCTCTCGAGATCGGTAAGGCTTGCGTGCATATGACTTCATGCAGACCGAGTTGCAGTCGCAGCACGTACCTGCAGGTTGATGTCTTCGTCGTTGTATCGGTTTACTGTCGCCAAACGGACGGCATTGCCTGTGCGTTTGGGTGCGGCCGTTCACGCGACGGAGCTAACAGACACCACGTGCTGAGGGCGTTGACAACTCTGCGCCTCTATCCGACCCGTC…
Taylor & Rogers 2015, Molecular Phylogenetics & Evolution	KP324538.1	NA	Animalia	Cnidaria	Anthozoa	Scleralcyonacea	Primnoidae	Fannyella	Fannyella spinosa	yes	0	NA	no	NA	NA	GAGAGTTAAAAAGTGCGTGAAACCGTTGGAAGGGAAGCGAATAGAGGTTGCAATTTGCCCTGTCGCGCTTGCTTTCGATCTTTCGAGACGATGCTTGCACGCCTGCGATCCGCGTCCGGTGCACTTCCGCTGGGCGACAGTCAACGTCGGTTTGCTCGGAGTTAGAAAGCTGCGAGCACGGTAGATCTCTCGGGATCGGTAAGGCTTGCGTGCACATAGCTTCGGTCAGACCGAGTTCTGTCGCAGCACGTACCTCAGGTTGACGTCTTCGTAGTCGAGACGGTTTAACGTCGCCTGGCGGACGGCTTTGCCTGTGCGTCGGCGTGCGGCCGCTCGAACGACGGGAAATGCGTACACCACGTGCTGAGGACGTTGACTCCACGGCGCCTCTATACGACC…
Taylor & Rogers 2015, Molecular Phylogenetics & Evolution	KP324539.1	NA	Animalia	Cnidaria	Anthozoa	Scleralcyonacea	Primnoidae	Thouarella	Thouarella antarctica	yes	1	29	no	NA	NA	GAGAGTTAAAAAGTACGTGAAACCGTTGWAAGGGAAGCGAATAGAGATAGAAATTCCTGGGCGTGCTTGGTTTCGATCTYTGTAGACGAGCCTTGTGCGCRYGCGTTGCGTGACCGGTGCACTTCCGCTTGGCGAATGTCAACGTCGGTTTGCGTGGCGTCAAAAAGCCGCATGCACGGTAGGTCTCACGGGATCGGTAAGGCTTGCGTGCAAACGAYTCCATGTAGACCGAGTTCTGTCGCAGCACGTACCTAAGGTTGATGTCCTCATCGTTATGTCGGTTTACCGTCGCTTGGCGGACGGCTTTGCCTGTGCGCTTAAGTGCGGCCGTTTAGACGATGGGGAATACATACACGACGTGCTGAGGACGTTGACGATTCTGCGCCTCTATCYGACCCG…
Taylor & Rogers 2015, Molecular Phylogenetics & Evolution	KP324540.1	NA	Animalia	Cnidaria	Anthozoa	Scleralcyonacea	Primnoidae	Fannyella	Fannyella rossii	yes	0	NA	no	NA	NA	GAGAGTTAAAAAGTGCGTGAAACCGTTGGAAGGGAAGCGAATAGAGGTTGCAATTCGACCTGTCGCGCTTGCTTTCGATCTTTCGAGACGATGCTTGCACGCCTGCGATCCGCGTCCGGTGCACTTCCGCTGGGCGACAGTCAACGTCGGTTTGCGCGGAGTTAGAAAGCTGCGAGCACGGTAGACTCTCGGGATCGGTAAGGCTTGCGTGCACATAGCTTCGGTCAGACCGAGTTCTGTCGCAGCACGTACCTGCAGGTTGACGTCTTCGTAGTCGAGACGGTTTAACGTCGCCTGGCGGACGGCTTTGCCTGTGCGTCGGCGTGCGGCCGCTCGAACGACGGGGAATGCGTACACCACGTGCTGAGGACGTTGACTTCACGGCGCCTCTATACGACC…
Taylor & Rogers 2015, Molecular Phylogenetics & Evolution	KP324541.1	NA	Animalia	Cnidaria	Anthozoa	Scleralcyonacea	Primnoidae	Thouarella	Thouarella variabilis	no	NA	NA	no	NA	NA	GAGAGTTAAAAAGTACGTGAACCGTTGAAAGGGAAGCGAATAGAGATAGAAATTCCCCTGGGCGTGCTTGGTTTCGATCTTTACAGACGAGCCTTGTACGCTTGCGTTGCGTGACCGGTGCACTTCCGCTTGGCGAATGTCAACGTCGGTTTGCGTGGCGTCAAAAAGCCGCATGCACGGTAGGTCTCACGGGATCGGTAAGGCATGCGTGCAAACAACTCCATGTAGACCGAGTTCTGTCGCAGCACGTACCTGAAGGTTGATGTCCTTATGTCGGTTTACCGTCGCTCGGCGGACGGCTTTGCCTGTGCGTCNAAGTGCGGCCGTTCAGACGATGGGCAATACATACAAGACGTGCTGAGGACGTTGACGAATCTGCGCCTCTATCCGACCCGTCTT…
Taylor & Rogers 2015, Molecular Phylogenetics & Evolution	KP324542.1	NA	Animalia	Cnidaria	Anthozoa	Scleralcyonacea	Primnoidae	Fannyella	Fannyella rossii	yes	0	NA	no	NA	NA	GAGAGTTAAAAAGTGCGTGAAACCGTTGGAAGGGAAGCGAATAGAGGTTGCAATTCGCCCTGTATCGTTGCTTTCGATCTTTCGAGACGATGCTTGCACGCCTGCGATCCGCGTCCGGTGCACTTCCGCTGGGCGACAGTCAACGTCGGTTTGCGCGGAGTTAGAAAGCTGCGAGCACGGTAGATCTCTCGGGATCGGTAAGGCTTGCGTGCACATAGCTTCGGTCAGACCGAGTTCTGTCGCAGCACGTACCTGCAGGTTGACGTCTTCGTAGTCGAGACGGTTTAACGTCGCCTGGCGGACGGCGTTGCCTGTGCGTCGGCGTGCGGCCGCTCGAACGACGGGGNATGYGTACACCACGTGCTGAGGACGTTGACTWCACGGCGCCTCTATACGACC…
Taylor & Rogers 2015, Molecular Phylogenetics & Evolution	KP324543.1	NA	Animalia	Cnidaria	Anthozoa	Scleralcyonacea	Primnoidae	Dasystenella	Dasystenella acanthina	yes	0	NA	no	NA	NA	GAGAGTNNAAAAGTGCGTGAAACCGCTGGAAGGGAAGCGAATGGAGTCGGAAATTCGCCTCGGCGCGTGCGTCTTTCTAGACGAAGCTTGCGCACGTGCGTCGCGCAACCGGTGCACTTCCGCTTGGCGAAAGTCAACGTCGGTTTGCGCGGAGCCAAAAAGCCGCGAGCACGGTAGGTCGCTCGCGATCGGTAAGGCTTGCGAGCGTACGGCTTCACGTAGACCGAGTTAAGTCGCAGCACGTACCTGCAGGTTGATGTCTTCGTAGCTGAGTAGGTTTAACCTCGCCGCGCGGACGGCTTTGCCTGTGCGTCGGCGAGCGGCCTGCCAAGCCACGGAGGAAGCAGACACGACGTGCTGAGCACGTTGGCTGCCCACCGGCTCCATCCGACCCGTCTT…
Taylor & Rogers 2015, Molecular Phylogenetics & Evolution	KP324544.1	NA	Animalia	Cnidaria	Anthozoa	Scleralcyonacea	Primnoidae	Arntzia	Arntzia gracilis	no	NA	NA	no	NA	NA	GAGAGTGAATAAGTGAGTGAACCAGTTGGANTGGAAGGGAATAGAGTTTSYAATYCGCTGTCGCGTTTGCTGTCGATCTTTTCAGACGACGCTTGCACGCTTGCGAGGGAGATCGGTGCACTTCCGCCTGGCGAAAGTCAACGTCGGTTTGCGCGGAGTTAGAAAGCTGCGAGCACGGTAGATCTCTCGGGATCGGTAAGGCTTGCGTGCAAATGGCTTCGTGCAGACCGAGTTCCGTCGCAGCACGTACCTGCTGGTTGATGTCTTCGTCTTTGAGACGGTTCACCGTCGCCTGGCGGACGGCTTTGCCTGTGCGTCGGCGTGCGGCCGCTCAAACGACGGGGGGAGCATACACCACGTGCTAAGGACGTTGACTCCTCGGCGGCTCTATACGACCCG…
Taylor & Rogers 2015, Molecular Phylogenetics & Evolution	KP324545.1	NA	Animalia	Cnidaria	Anthozoa	Scleralcyonacea	Primnoidae	Fannyella	Fannyella spinosa	yes	0	NA	no	NA	NA	GAGAGTTAAAAAGTGCGTGAAACCGTTGGAAGGGAAGCGAATAGAGGTTGCAATTTGCTGTCGCGCTTGCTTTCGATCTTTCGAGACGATGCTTGCACGCCTGCGATCCGCGTCCGGTGCACTTCCGCTGGGCGACAGTCAACGTCGGTTTGCTCGGAGTTAGAAAGCTGCGAGCACGGTAGATCTCTCGGGATCGGTAAGGCTTGCGTGCACATAGCTTCGGTCAGACCGAGTTCTGTCGCAGCACGTACCTGCAGGTTGACGTCTTCGKAGTCGAGACGGTTTAACGTCGCCTGGCGGACGGCTTTGCCTGTGCGTCGGCGTGCGGCCGCTCGAACGACGGGNAATGCGTACACCACGTGCTGAGGACGTTGACTCCACGGCGCCTCTATACGACCC…
Taylor & Rogers 2015, Molecular Phylogenetics & Evolution	KP324546.1	NA	Animalia	Cnidaria	Anthozoa	Scleralcyonacea	Primnoidae	Thouarella	Thouarella crenelata	yes	0	NA	no	NA	NA	GAGAGTTAAAAAGTGCGTGAAACCGTTGGAAGGGAAGCGAATAGAGATAGAAATTCTTGGCCGTGCTCGGTTTCGATCTTTATAGACGAACCTTGTACGCTTGCGTTGCGTGACCGGTGCACTTCCGCTCGGCGAATGTCAACGTCGGTTTGCGTGGCGTGAAAAAGCCGCATGCACGGTAGGTCCCACGGGATCGGTAAGGCTTGCGTGCAATCGACTCCATGTAGATCGAGTTCTGTCGCAGCACGTACCTAAGGTTGATGTCCTCATCGTTATGTCGGTTTACCGTCGCTTGGCGGACGGCTTTGCCTGTGCGTTTAAGTGCGGCCGTTTAGACGATGCGAAATACATACACGACGTGCTGAGGACGTTGACGATTCTGCGCCTCTATCCGACCCG…
Taylor & Rogers 2015, Molecular Phylogenetics & Evolution	KP324547.1	NA	Animalia	Cnidaria	Anthozoa	Scleralcyonacea	Primnoidae	Primnoidae_incertae_sedis	Primnoidae gen. n. C sp.	yes	1	32	no	NA	NA	GAGAGNTAAAAAGTGCGTGAAACCGTTGGAAAGGAAGCGAATGGAGCTTGCAATTCGCCTTGCGGCTTTCTTTTTAGACGACGCTTGCACGCTTGCGATGCGCGATCGGTGCACTTCCGCCTGGCGAATGTCAACGTCGGTTTGCGCGGAGTCAGAAAGCTGCGAGCACGGTAGGTCTCTCGGGATCGGCAAGGCTTGCGTGCACACGGCTTCGTTCGGACCGAGTTCTGTCGCAGCACGTACCTGCAGGTTGATGCGTTCGTCTTTGAGCCGGTTTAACGTCGTCTGGCGGACGGCTTTGCCTGTGCGTCGGCGTGCGGCCGCTCAAACGATGGGCAAAGCATACACCGCGTGCTAAGGACGTTGACTCCTCGGCGGCTCCATACGACCCGTCTTGAA…
Taylor & Rogers 2015, Molecular Phylogenetics & Evolution	KP324548.1	NA	Animalia	Cnidaria	Anthozoa	Scleralcyonacea	Primnoidae	Fannyella	Fannyella rossii	yes	0	NA	no	NA	NA	GAGAGTTAAAAAGTGCGTGAAACCGTTGGAAGGGAAGCGAATAGAGGTTGCAATTCGCCCTGTCGCGCTTGCTTTCGATCTTTCGAGACGATGCTTGCACGCCTGCGATCCGCGTCCGGTGCACTTCCGCTGGGCGACAGTCAACGTCGGTTGCGCGGAGTTAGAAAGCTGCGAGCACGGTAGATCTCTCGGGATCGGTAAGGCTTGCGTGCACATAGCTTCGGTCAGACCGAGTTCTGTCGCAGCACGTACCTCAGGTTGACGTCTTCGTAGTCGAGACGGTTTAACGTCGCCTGGCGGACGGCGTTGCCTGTGCGTCGGCGTGCGGCCGCTCGAACGACGGGGAATGCGTACACCACGTGCTGAGGACGTTGACTTCACGGCGCCTCTATACGACCC…
Taylor & Rogers 2015, Molecular Phylogenetics & Evolution	KP324551.1	NA	Animalia	Cnidaria	Anthozoa	Scleralcyonacea	Primnoidae	Callogorgia	Callogorgia sp.	yes	0	NA	no	NA	NA	AGAGAGTAAAAAGTGCGTGAAACCGTTGGAAGGGAAGCGAATAGAGTTAGCAATTCGTTGCCGCGTGCTCGGCTTCGATCTTTCTAGACGAGCCCCGTACGCTCGCGTTGTTGGGCGGTGCACTTCCGGCTGGCGAAAGTCACCGTCGGTTTGCACGGAGTCAGAAAGCTGCAAGCACGGTAGGTCTCTCGTGATCGGTAAGGCTTGCGTGCAAATGGCTTCATGTAGACCGAGTTCTGTCGCAGCACGTGCCTGCAGGCTGATGTCCTTGTCGTTGAGTCGGTTCAATGTCGCTGGACGGACGGCTTTGCCTGTGCGTCCCGGTGCGGCCGTTCAAACGACGGGGCAAACAGACACGACGCGCTGAGGGCGTTGACCGCTCGGCGGCTCTATCCGACC…
Taylor & Rogers 2015, Molecular Phylogenetics & Evolution	KP324552.1	NA	Animalia	Cnidaria	Anthozoa	Scleralcyonacea	Primnoidae	Narella	Narella cf. mosaica	yes	0	NA	no	NA	NA	GAGAGTTAAAAAGTGCGTGAAACCGCTGGAAGGGAAGCGAATGGAGTTCGCAACACGTCTTGTCGTGCTCGATCTTTCTAGACGAGCCTTGTGCGGTCGYGTGACGTGGGCGGTGCACTTCCGGCCGGCGAAAGTCAACGTCGGTTTGCCGCGAGTTAAAAAGCTGCGAGCACGGTAGGTCCKTCAGGATCGGTAAGGCTTGTATGCACATGACTCGCTGCAGACCGAGTTCTGCCGCAGCGCGTACCTGCAGGCTGCTGTCTTTATCGTTKAATCGGTATAATGTCACTGGACGGACGGCTTTGCCTGTGCGTCAGCGTGCTCCCGTTCAAACGATGAGGCAAACAGACACGACGCGCTGAGGACGTTGACCCCCCGGCGACTCCATTCGACCCGTCT…
Taylor & Rogers 2015, Molecular Phylogenetics & Evolution	KP324553.1	NA	Animalia	Cnidaria	Anthozoa	Scleralcyonacea	Primnoidae	Fannyella	Fannyella spinosa	yes	0	NA	no	NA	NA	GAGAGTTAAAAAGTGCGTGAAACCGTTGGAAGGGAAGCGAATAGAGGTTGCAATTTGCTGTCGCGCTTGCTTTCGATCTTTCGAGACGATGCTTGCACGCCTGCGATCCGCGTCCGGTGCACTTCCGCTGGGCGACAGTCAACGTCGGTTTGCTCGGAGTTAGAAAGCTGCGAGCACGGTAGATCTCTCGGGATCGGTAAGGCTTGCGTGCACATAGCTTCGGTCAGACCGAGTTCTGTCGCAGCACGTACCTGCAGGTTGACGTCTTCGTAGTCGAGACGGTTTAACGTCGCCTGGCGGACGGCTTTGCCTGTGCGTCGGCGTGCGGCCGCTCGAACGACGGGGAATGCGTACACCACGTGCTGAGGACGTTGACTCCACGGCGCCTCTATACGACCC…
Taylor & Rogers 2015, Molecular Phylogenetics & Evolution	KP324554.1	NA	Animalia	Cnidaria	Anthozoa	Scleralcyonacea	Primnoidae	Ophidiogorgia	Ophidiogorgia cf. kuekenthali	yes	0	NA	no	NA	NA	GAGAGTTAAAAAGTGCGTGAAACCGTTGGAAGGGAAGCGAATAGAGTTTGCAATTCGCCCCGTCGCGCTTCGATCTTTTCAGACGACGCTTGCACGCTTGCGATGCGAGGGTGCACTTCCGCCTGGCGAAAGTCAACGTCGGTTTGCGCGAAGTTAGAAAGCTGCGAGCGCGGTAGATCTCTCGGGATCGGTAAGGCTTGCGTGCAAATGGCTTCGTTCAGACCGAGTTCCGTCGCAGCACGTACCTGCAGGCTGATGTCTTCGCCTTTGAGACGGTTCAACGTCGTCTGGCGGACGGCTTTGCCTGTGCGTCGGCGTGCGGCCGCTCAAACGACGGAGAAAGCATACACCACGTGCTAAGGACGTTGACTCCTCGGCAGCTCTATACGACCCGTCTTG…
Taylor & Rogers 2015, Molecular Phylogenetics & Evolution	KP324555.1	NA	Animalia	Cnidaria	Anthozoa	Scleralcyonacea	Primnoidae	Ophidiogorgia	Ophidiogorgia cf. kuekenthali	yes	0	NA	no	NA	NA	GAGAGTTAAAAAGTGCGTGAAACCGTTGGAAGGGAAGCGAATAGAGTTTGCAATTCGCCCCGTCGCGCTTGCTGTCGATCTTTTCAGACGACGCTTGCACGCTTGCGATGCGAGATCGGTGCACTTCCGCCTGGCGAAAGTCAACGTCGGTTTGCGCGAAGTTAGAAAGCTGCGAGCACGGTAGATCTCTCGGGATCGGTAAGGCTTGCGTGCAAATGGCTTCGTTCAGACCGAGTTCCGTCGCAGCACGTACCTGCAGGCTGATGTCTTCGCTTTGAGACGGTTCAACGTCGTCTGGCGGACGGCTTTGCCTGTGCGTCGGCGTGCGGCCGCTCAAACGACGGAGAAAGCATACACCACGTGCTAAGGACGTTGACTCCTCGGCAGCTCTATACGACC…
Taylor & Rogers 2015, Molecular Phylogenetics & Evolution	KP324556.1	NA	Animalia	Cnidaria	Anthozoa	Scleralcyonacea	Primnoidae	Thouarella	Thouarella pendulina	yes	2	20, 19	no	NA	NA	GAGAGNTAANAAGTACGTNGAACCGTTGAAAGGGAAGNAAATAGAGATAGAAATTCTGGCGTGCTTGGTTTCGATCTTTACAGACGAGCCTTGTACGCTTGCGTTGCGTGACCGGTGCACTTCCGCTTGGCGAATGTCAACGTCGGTTTGCGTGGCGTCAAAAAGCCGCATGCACGGTAGGTCTCACGGGATCGGTAAGGCATGCGTGCAAACAACTCCATGTAGACCGAGTTCTGTCGCAGCACGTACCTGAAGGTTGATGTCCTTATGTCGGTTTACCGTCGCTCGGCGGACGGCTTTGCCTGTGCGTCAAGTGCGGCCGTTCAGACGATGGGCAATACATACAAGACGTGCTGAGGACGTTGACGAATCTGCGCCTCTATCCGACCCGTCTTGAAA…
Taylor & Rogers 2015, Molecular Phylogenetics & Evolution	KP324557.1	NA	Animalia	Cnidaria	Anthozoa	Scleralcyonacea	Primnoidae	Ophidiogorgia	Ophidiogorgia cf. kuekenthali	yes	0	NA	no	NA	NA	GAGAGTTAAAAAGTGCGTGAAACCGTTGGAAGGGAAGCGAATAGAGTTTGCAATTCGCCCCGTCGCGCTTGCTGTCGATCTTTGCAGACGACGCTTGCACGCTTGCGATGCGAGATCGGTGCACTTCCGCCTGGCGAAAGTCAACGTCGGTTTGCGCGAAGTTAGAAAGCTGCGAGCACGGTAGATCTCTCGGGATCGGTAAGGCTTGCGTGCAAATGGCTTCGTTCAGACCGAGTTCCGTCGCAGCACGTACCTGCAGGCTGATGTCTTCGCCTTTGAGACGGTTCAWCGTCGTCTGGCGGACGGCTTTGCCTGTGCGTCGGCGTGCGGCCGCTCAAACGACGGAGAAAGCATACACCACGTGCTAAGGACGTTGACTCCTCGGCAGCTCTATACGAC…
Taylor & Rogers 2015, Molecular Phylogenetics & Evolution	KP324558.1	NA	Animalia	Cnidaria	Anthozoa	Scleralcyonacea	Primnoidae	Fannyella	Fannyella rossii	yes	0	NA	no	NA	NA	GAGAGTTAAAAAGTGCGTGAAACCGTTGGAAGGGAAGCGAATAGAGGTTGCAATTCGCTGTCGCGCTTGCTTTCGATCTTTCGAGACGATGCTTGCACGCCTGCGATCCGCGTCCGGTGCACTTCCGCTGGGCGACAGTCAACGTCGGTTTGCGCGGAGTTAGAAAGCTGCGAGCACGGTAGATCTCTCGGGATCGGTAAGGCTTGCGTGCACATAGCTTCGGTCAGACCGAGTTCTGTCGCAGCACGTACCTGCAGGTTGACGTCTTCGTAGTCGAGACGGTTTAACGTCGCCTGGCGGACGGCGTTGCCTGTGCGTCGGCGTGCGGCCGCTCGAACGACGGGGAATGCGTACACCACGTGCTGAGGACGTTGACTTCACGGCGCCTCTATACGACCC…
Taylor & Rogers 2015, Molecular Phylogenetics & Evolution	KP324559.1	NA	Animalia	Cnidaria	Anthozoa	Scleralcyonacea	Primnoidae	Fannyella	Fannyella spinosa	yes	1	33	no	NA	NA	GAGAGTTAAATAGTGCGTGAAACCGTTAGAAGAGAAGCGAATAGAGGTTGCAATTTGCTGTCGCGCTTGCTTTCGATCTTTCGAGACGATGCTTGCACGCCTGCGATCCGCGTCCGGTGCACTTCCGCTGGGCGACAGTCAACGTCGGTTTGCTCGGAGTTAGAAAGCTGCGAGCACGGTAGATCTCTCGGGATCGGTAAGGCTTGCGTGCACATAGCTTCGGTCAGACCGAGTTCTGTCGCAGCACGTACCTGCAGGTTGACGTCTTCGTAGTCGAGACGGTTTAACGTCGCCTGGCGGACGGCTTTGCCTGTGCGTCGGCGTGCGGCCGCTCGAACGACGGGRAATGCGTACACCACGTGCTGAGGACGTTGACTCCACGGCGCCTCTATACGACCC…
Taylor & Rogers 2015, Molecular Phylogenetics & Evolution	KP324560.1	NA	Animalia	Cnidaria	Anthozoa	Scleralcyonacea	Primnoidae	Thouarella	Thouarella cf. antarctica	yes	1	20	no	NA	NA	GAGAGNTAGNAGGTGCGNGNAACCGTNGGAAGGGAAGCGAATAGAGATAGAAATTCTTGGCCGTGCCCGGTTCGATCTTTTAGACGAGCCTTGTACGCTTGCGTTGCGTGACCGGTGCACTTCCGCTTGGTAAATGTCAACGTCGGTTCGCGTGGTGGAAAAAGCCGCATGCACGGTAGGTCCCACTGGATCGGTAAGGCTTGCGTGCAATCGACTCCACGTAGACCGAGTTCGTCGCAGCACGACGCTGAAGGTTGATGTCCTCGTCGTCATGTCGGTTTATCGTCGCTTGGCGGACGGCTTTGCCTGTGCGTTTAAGTGCGGCCGTTTAGACGATGCGCAATACATACACGACGTGCTGAGGACGTTGACGATTCTGCGCCTCTATCCGACCCGTCT…
Taylor & Rogers 2015, Molecular Phylogenetics & Evolution	KP324561.1	NA	Animalia	Cnidaria	Anthozoa	Scleralcyonacea	Primnoidae	Callozostron	Callozostron acanthodes	yes	0	NA	no	NA	NA	GAGAGTTAAAAAGTGCGTGAAACCGTTGGAAGGGAAGCGAATAGAGATAACAATTCATTGGCGTGCTTGGTTTCGATCTTTCTAGACGAGCCTTGTACGTTTGCATTGTGTGAACGGCGCACTTCCGCTTGGCGAGAGTCAACGTCGGTTTGCGTGAATTCAAAAAGCCGCAAGCACGGTAGGTCCCACGGGATCGGTAAGGCTTGCGAGCAAATGATTTCACGTGGACCGAGTTCAGTCGCAGCACGTACCTGCAGGTTGCTGTCTTCGTCGTTGAGTCGGTTTAACGTCGCTAGACGGACGGCTGAGCCTGTGCGTCTGCGTGCGGCCGCTCCGACGATGGGGCAAACAGACATGACGTGCTGAGGACGTTGACAATTCTGTGGCTCTATCCGACCC…
Taylor & Rogers 2015, Molecular Phylogenetics & Evolution	KP324562.1	NA	Animalia	Cnidaria	Anthozoa	Scleralcyonacea	Primnoidae	Paracalyptrophora	Paracalyptrophora cf. josephinae	yes	0	NA	no	NA	NA	GAGAGTTAAAAAGTGCGTGAAACCGCTGGAAGGGAAGCGAATGGAGTCGGCAATTCGTCTTGTCGTGCTCGTTCTCGATCTTTCGAGACGAGCCTTGTGCGCGTGCGTTACGTGGGCGGTGCACTTCCGGCAGGCGAACGTCAACGTCGGTTTGCCGCGAGTCACAAAGCTGCGAGCACGGTAGGTCCCTCGGGATCGGTAAGGCTTGTGTGCACATGGCTCGATGCAGACTGAGTTCTGGCGCAGCGCGTACCTCGGGCTGCTGTCTTGATCGTTGAATCGGTCGCGCCGCTGGACGGACGGCTTTGCCTGTGCGTCGTGGTGCGGCCGACCAGCCGATTGACAAACAGACACGACGCGCTGAGGACGTTGACCGCCCAGCGACTCCATCCGACCCGT…
Taylor & Rogers 2015, Molecular Phylogenetics & Evolution	KP324563.1	NA	Animalia	Cnidaria	Anthozoa	Scleralcyonacea	Primnoidae	Thouarella	Thouarella laxa	yes	1	18	no	NA	NA	GAGAGTTAAAAAGTGCGCGAAACCGTTGGAAGGGAAGCGAATAGAGTGAGAAATTCCCCTTGGCTTGCTTGGTTTCGATCTTTATAGACGAGCCTTGTACGCTTGCGTTGCGTGACCGGTGCACTTCCGCTTGGCGAAAGTCAACGTCGGTTGCGTGGTGTCAAAAAGCCGCAGGCACGGTAGGTCTCCAGAGACCGGTAGGGCTCGCGCGCAAATGACTTCATGTAGACCGAGTTCTGTCGCAGCACGTACCTGCAGGTTGATGTCTTCGTCGTTATGTCGGTTTAACGTCGCTTGACGTACGGCTTTGCCTGTGCGTCTGGGTGCGGCCGTTTAGACGATGGGGAAAACATACACGACGTGCTGAGGACGTTGACAGTTCTGCGCCTCTATCCGACC…
Taylor & Rogers 2015, Molecular Phylogenetics & Evolution	KP324564.1	NA	Animalia	Cnidaria	Anthozoa	Scleralcyonacea	Primnoidae	Thouarella	Thouarella laxa	yes	1	18	no	NA	NA	GAGAGTTAAAAAGTGCGCGAAACCGTTGGAAGGGAAGCGAATAGAGTGAGAAATTCCCCTTGGCTTGCTTGGTTTCGATCTTTATAGACGAGCCTTGTACGCTTGCGTTGCGTGACCGGTGCACTTCCGCTTGGCGAAAGTCAACGTCGGTTTGCGTGGTGTCAAAAAGCCGCAGGCACGGTAGGCTCCAGAGACCGGTAGGGCTCGCGCGCAAATGACTTCATGTAGACCGAGTTCTGTCGCAGCACGTACCTGCAGGTTGATGTCTTCGTCGTTATGTCGGTTTAACGTCGCTTGACGTACGGCTTTGCCTGTGCGTCTGGGTGCGGCCGTTTAGACGATGGGGAAAACATACACGACGTGCTGAGGACGTTGACAGTTCTGCGCCTCTATCCGACC…
Taylor & Rogers 2015, Molecular Phylogenetics & Evolution	KP324565.1	NA	Animalia	Cnidaria	Anthozoa	Scleralcyonacea	Primnoidae	Callogorgia	Callogorgia sp.	yes	1	33	no	NA	NA	GAGAGTTAAAAGTGCGTGAAACCGTTGGAAGGAAGCGAATAGAATTAGCAATTCGCCTTGGCGTGCTCGGCTTCGATCTTTCTAGACGAGCCCCGTACGCTCGCGTTGCGGGCGGTGCACTTCCGGTTGGCGAAAGTYAACGTCGGTTTGCACGGAGTCAAAAAGCTGCMAGCACGGKAGGTCTCTCGTGATCGGTAAGGCTTGCGTGCAAATGGCTTCATGTAGACCGAGTTCTGTCGCAGCACGTACCTGCAGGCTGATGTCCTTGTCGTTGAGTCGGTTTAATGTCGCTGGACGGACGGCTTTGCCTGTGCGTCCCGGTGCGGCCGTTCARACGACGGGGCAAACAGACACGACGTGCTGAGGACKTCGACCGCTCGGCGGCTCTATCCGACCCGT…
Taylor & Rogers 2015, Molecular Phylogenetics & Evolution	KP324566.1	NA	Animalia	Cnidaria	Anthozoa	Scleralcyonacea	Primnoidae	Callogorgia	Callogorgia medialis	yes	0	NA	no	NA	NA	GAGAGTTAAAAAGTGCGTGAAACCGCTGGAAGGGAAGCGAATAGAGTTTGCAATTCGCCTTGCGGCTCGTCTTTCTAGACGAGCCTTGCACGCTCGCGTTGCTTGGGCGGTGCACTTCCGGTTGGCGAAAGTCAACGCCGGTTTGCGAGGAGTCAAAAAGCTGCAAGCACGGTAGGTCTCTCGTGACCGGTAAGGCTTGCGAGCAAATGGCTTCACGTAGACCGATTTCTGTCGCAGCACGTACCTGCGGGCTGCTGTCCTTATCGTTGAGTCGGTTTAATGTCGCTGGACGGACGGCTTTGCCTGTGCGTCCCGGTGCGGCCGTTCAAACGATGGGGCCAACAGACACGACGTGCTGAGGACGTTGACCGCTCGGCGGCTCTATCCGACCCGTCTTGA…
Taylor & Rogers 2015, Molecular Phylogenetics & Evolution	KP324567.1	NA	Animalia	Cnidaria	Anthozoa	Scleralcyonacea	Primnoidae	Callogorgia	Callogorgia euthyeia	yes	0	NA	no	NA	NA	GAGAGTTAAAAAGTGCGTGAAACCGCTGGAAGGGAAGCGAATAGAGTTTGCAATTCGCCTTGGCGTGCTCGGCCTCGATCTTTCTAGACGAGCCTTGCACGCTCGCGTTGCTTGGGCGGTGCACTTCCGGTTGGCGAAAGTCAACGCCGGTTTGCGAGGAGTCAAAAAGCTGCAAGCACGGTAGGTCTCTCGTGACCGGTAAGGCTTGCGAGCAAATGGCTTCACGTAGACCGATTTCTGTCGCAGCACGTACCTGCGGGCTGCTGTCCTTATCGTTGAGTCGGTTTAATGTCGCTGGACGGACGGCTTTGCCTGTGCGTCCCGGTGCGGCCGTTCAAACGATGGGGCCAACAGACACGACGTGCTGAGGACGTTGACCGCTCGGCGGCTCTATCCGAC…
Taylor & Rogers 2015, Molecular Phylogenetics & Evolution	KP324568.1	NA	Animalia	Cnidaria	Anthozoa	Scleralcyonacea	Primnoidae	Callogorgia	Callogorgia cf. tuberculata/granulosa	yes	2	20, 29	no	NA	NA	GAGAGNTAAAAAGNGCGTGNAACCGCTGNAANGGAAGCGAATAGAGTTNGCAATTCGTGACGTGCTCGGCCTCGATCTTTCTAGACGAGCCTTGCACGCTCGCGTTGCTTGGGCGGTGCACTTCCGGTTGGCGAAAGTCAACGCCGGTTTGCGAGGAGTCAAAAAGCTGCAAGCACGGTAGGTCTCTCGTGACCGGTAAGGCTTGCGAGCAAATGGCTTCACGTAGACCGATTTCTGTCGCAGCACGTACCTGCGGGCTGCTGTCCTTATCGTTGAGTCGGTTTAATGTCGCTGGACGGACGGCTTTGCCTGTGCGTCCCGGTGCGGCCGTTCAAACGATGGGGCCAACAGACACGACGTGCTGAGGACGTTGACCGCTCGGCGGCTCTATCCGACCCG…
Taylor & Rogers 2015, Molecular Phylogenetics & Evolution	KP324569.1	NA	Animalia	Cnidaria	Anthozoa	Scleralcyonacea	Primnoidae	Callogorgia	Callogorgia sp.	yes	0	NA	no	NA	NA	AAAAGTTAAAAAGTGCGTGAAACCGTTGGAAGGGAAGCGAATAGAGTTAGCAATTCGTTGCCGCGTGCTCGGCTTCGATCTTTCTAGACGAGCCCCGTACGCTCGCGTTGTGGGCGGTGCACTTCCGGCTGGCGAAAGTCACCGTCGGTTTGCACGGAGTCAAAAAGCTGCAAGCACGGTAGGTCTCTCGTGATCGGTAAGGCTTGCGTGCAAATGGCTTCATGTAGACCGAGTTCTGTCGCAGCACGTGCCTGCAGGCTGATGTCCTTGTCGTTGAGTCGGTTCAATGTCGCTGGACGGACGGCTTTGCCTGTGCGTCCCGGTGCGGCCGTTCAAACGACGGGGCAAACAGACACGACGCGCTGAGGGCGTTGACCGCTCGGCGGCTCTATCCGACCC…
Taylor & Rogers 2015, Molecular Phylogenetics & Evolution	KP324570.1	NA	Animalia	Cnidaria	Anthozoa	Scleralcyonacea	Primnoidae	Callogorgia	Callogorgia korema	yes	0	NA	no	NA	NA	GAGAGTTAAAAAGTGCGTGAAACCGTTGGAAGGGAAGCGAATGGAGTTAGCAATTCGCCTTGGCGTGCTCGGCTTCGATCTTTCTAGACGAGCCCCGTACGCTCGCGTTGCGGGCGGTGCACTTCCGCTTGGCGAACGTCAACGTCGGTTGGCGCGGAGTCAAAAAGCTGCAAGCACGGTAGGTCAYTCGTGACCGGTAAGGCTTGCGTGCAAATGGCTTCATGTAGACCGAGTTMTGTCGCAGCACGTGCCTGCTGATGTYCTTATCGTTGAGTCGGTTCAATGGCGCTGGACGTACGGCTTTGCCTGTGCGTCCCGGYGCGGCCGTTCACACGATGGGGCAAGCAGACACCACGCGCTGAGGACGTTGACCGCTCGGCGGCTCTATCCGACCCGTCT…
Taylor & Rogers 2015, Molecular Phylogenetics & Evolution	KP324571.1	NA	Animalia	Cnidaria	Anthozoa	Scleralcyonacea	Primnoidae	Thouarella	Thouarella cf. laxa	yes	1	8	no	NA	NA	AAGTGCGCGAAACCGTTGGAAGGGAAGCGAATAGAGTTAGAAATTCCCCTYGGYKTGCTTGGTTTCGATCTTTATAGACGAGCCTTGTACGCTWGCGTTGCGTGACCGGTGCACTTCCGCTTGGCGAAAGTCAACGTCGGTTTGCGTGGTGTCAAAAAGCCGCAGGCACGGTAGGTCTCCAGAGACCGGTRGGGCTCGCGCGCAAATGACTTCATGTAGACCGAGTTCTGTCGCAGCACGTACCTGCAGGTTGATGTCTTCGTCGTTATGTCGGTTTWACGTCGCTTGACGKACGGCTTTGCCTGTGCGTCTGGGTGYGGCCGYWTAGACGATGGGGAAAACATACACGACGTGCTGAGGACGTTGACAGTTCTGCGCCTCTATCCGACCCGTCTTGAA…
Taylor & Rogers 2015, Molecular Phylogenetics & Evolution	KP324572.1	NA	Animalia	Cnidaria	Anthozoa	Scleralcyonacea	Primnoidae	Narella	Narella clavata	yes	2	400, 412	no	NA	NA	GAGAGTTAAAAAGTGCGTGAAACCGCTGGAAGGGAAGCGAATGGAGTCCGCAATTCGTTGTCGTGCTCYGMCTCGATCTTTCTAGACGAGCCCTGTGCGGTCGCGCGACGTGGGCGGTGCACTTCCGACCGGCGAACGTCAACGTCGGTTTGCCGCGAGTTAAAAAGCTGCGAGCACGGTAGGTCCGTCMGGATCGGTAAGGCTTGYAYGCACATGACTCGCTGCAGACCGAGTTCTGCCGCAGCGCGTACCTAAGGCTGCTGTCTTTATCGTTGAATCGGTATGACGTCACTGGACGGACGGCTTTGCCTGKGCGTCGGCGTGCTCATGTTCAAACCAGGAGCCCAACSGMCACKACGMGAWGASRARSTTAACMGCCCGGCGMCTTCAKCCGRCCCG…
Taylor & Rogers 2015, Molecular Phylogenetics & Evolution	KP324573.1	NA	Animalia	Cnidaria	Anthozoa	Scleralcyonacea	Primnoidae	Perissogorgia	Perissogorgia monile	yes	0	NA	no	NA	NA	GAGAGTTAAAAAGTGCGTGAAACCGTTGGAAGGGAAGCGAATAGAGCTGGAAATTCACCTTGTGCTTATCTTTCTAGACGAGCCTTGTGCGCTCGCATTGCCGGGGCGGTGCACTTTCGGTTGGCGAACGTCAACGTCGGTTTGCGCGGAGTCAAAAAGCCGCAAGTGCGGTAGGTCTCTCGGGATCGGTAAGACTTGCGTGCAAATAGCTTCATGTAGACCGCGTACTGCCGCAGCACGTGCCTGTAGGCGGCTGTGTTCTTCGTTGTGTCGGCGTATTGTCGCTCGACGGACGGCTTTGCCTGTGCGTCGGGTGCGACCGTCAAAACGATGGGCAACAGACACACGACGTGCTGAGGACGTTGGCCGCTCGGCGGTTCTATCCGACCCGTCTTGAAA…
Taylor & Rogers 2015, Molecular Phylogenetics & Evolution	KP324574.1	NA	Animalia	Cnidaria	Anthozoa	Malacalcyonacea	Malacalcyonacea_incertae_sedis	Thesea	Thesea sp.	yes	0	NA	no	NA	NA	GAGAGTTAAAAAGTACGTGAAACCGTTGAAAGGGAAGCGAATGGAGTTAGCAATTCGCCCCACGTACGCGCTCTCGATCCGCATGGACGAGACGTGTGCGGGTGCGATGCGCGGTCGGCGCACTTCTGGCGAGCGAGCGTCAGCGTCGGTTGTCGACGGGCGACAAGGCACAAGGAAGGTAGATGACCTACGGCCGGTTGTTAAGNCCTGTGCTCGAATAGCTCGACGGCGACCGTGGTCGGCGACGCGTGCCTGGTGACTCGAACGATCGGTCCGGCATGTCGACCGTGGCGGACGGCACGCCTGTGCGTCGAACTGCTGCCGGTCGATCGGACGATTTCGCACACTACGCGTCGAAGATGCTGACGGCCATACGGCTCCATCCGACCCGTCTTGAAA…
Taylor & Rogers 2015, Molecular Phylogenetics & Evolution	KP324576.1	NA	Animalia	Cnidaria	Anthozoa	Scleralcyonacea	Primnoidae	Thouarella	Thouarella diadema	yes	0	NA	no	NA	NA	AGTACGTGAAACCGTTGGAAGGGAAGCGAATAGAGATAGAAATTCCTCGGCGTGCTTGGTTTCGATCTTTATAGACGAGCCTTGTACGCTTGCGTTGCGTGACCGGTGCACTTCCGCGTGGCGAATGTCAACGTCGGTTTGCGTGGTGCCAAAAAGCCGCATGCACGGTAGGTCTCACGGGATCGGTAAGGCTTGCGTGCAAACGACTCCATGTAGACCGAATTCTGTCGCAGCACGTACCTGAACGTTGATGTCCTCATCGTTATGTCGGTTTACCGTCGCTTGGCGGACGGCTTTGCCTGTGCGTTCAAGTGCGGCCGTTTAGACGATGGGAAATACATACACGACGTGCTGAGGACGTTGACGATTCTGCGCCTCTATCCGACCCGTCTTGAAACA…
Taylor & Rogers 2015, Molecular Phylogenetics & Evolution	KP324577.1	NA	Animalia	Cnidaria	Anthozoa	Scleralcyonacea	Primnoidae	Thouarella	Thouarella undulata	yes	0	NA	no	NA	NA	GAGAGTTAAAAAGTACGTGAAACCGTTGGAAGGGAAGCGAATAGAGATAGAAATTCCCCTTGCTGCTCATCTTCATAGACGAGCCTTGTACGCTTGCGTTGCGTGACCGGTGCACTTCCGCTTGGCGAATGTCAACGTCGGTTTGCGTGGCGTGAAAAAGCCGCATGCACGGTAGGTCCCACGGGGTCGGAAAGGCTTGCGTGCAAATGACTTCACGTAGACCGAGTTCTGTCGCAGCACGTACCTGCAGGTTGATGTCTTCATCGTTATGTCGGTTTACCGTCGCTTGACGGACGGCTTTGCCTGTGCGTTCAAGCGCAGCCGTTTAGACGATGGGCAATACATACACGACGTGCTGAGGACGTTGACGATTCTGCGCCTCTATCCGACCCGTCTTGA…
Taylor & Rogers 2015, Molecular Phylogenetics & Evolution	KP324578.1	NA	Animalia	Cnidaria	Anthozoa	Scleralcyonacea	Primnoidae	Dasystenella	Dasystenella acanthina	yes	0	NA	no	NA	NA	GAGAGTTAAAAAGTGCGTGAAACCGCTGGAAGGGAAGCGAATGGAGTCGGCAATTCGCCTCGCAGCGCGTTTCGTTCCTAGACGAAGCTTGCGCACGTGCGTCGCGCAACCGGTGCACTTCCGCTTGGCGAAAGTCAACGTCGGTTTGCGCGGAGTCAAAAAGCCGCGAGCACGGTAGGTCGCTCGCGATCGGTAAGGCTTGCGAGCGAACGGCTTCACGTAGACCGAGTTAAGTCGCAGCACGTACCTGCAGGTTGATGTCTTCGTAGCTGAGTAGGTTTAACCTCGCCGCGCGGACGGCTTTGCCTGTGCGTCGGCGAGCGACCTGTCAAGCCACGGAGGAAGCAGACACGACGTGCTGAGCACGTTGGCTGCCCACCGGCTCCATCCGACCCGTCT…
Taylor & Rogers 2015, Molecular Phylogenetics & Evolution	KP324579.1	NA	Animalia	Cnidaria	Anthozoa	Scleralcyonacea	Primnoidae	Metafannyella	Metafannyella kuekenthali	yes	0	NA	no	NA	NA	GAGAGTTAAAAAGTACGTGAAACCGTTGGAAGGGAAGCGAATAGAGTTTGCAATTCGCCTCGTCGCGCTTGTTTTTAGACGAAACTTGCACGCCCGCGTCACGTGACCGGTGCATTTCCGCTTGGCGAAAGTCAGCGTCGGTTTGCGAGGAGCGAAAAAGCCGCAAGCACGGTAGGCCTCTTGGGATCGGTAAGGCTTGTGTGCAAATGGCTTCACGTAGACCGAGGTCTGCGGCAGCACGAACCTGCTGGTTGATGTCCTCGTTTTTACGTCGGTTTGACGTTGCCGGACGGACGGCTTTGCCTGTGCGTCCGTGCGCGTCCCTTCGAACGAATGAGAAAACAGACACGACGTGCTGAAGACGCTGCCTTCTGGCTGGCTCTATCCGACCCGTCTTGA…
Taylor & Rogers 2015, Molecular Phylogenetics & Evolution	KP324580.1	NA	Animalia	Cnidaria	Anthozoa	Scleralcyonacea	Primnoidae	Thouarella	Thouarella variabilis	yes	0	NA	no	NA	NA	GAGAGTTAAAAAGTACGTGAAACCGTTGAAAGGGAAGCGAATAGAGATAGAAATTCCCCTGGGCGTGCTTGGTTTCGATCTTTACAGACGAGCCTTGTACGCATGCGTTGCGTGACCGGTGCACTTCCGCTTGGCGAATGTCAACGTCGGTTTGCGTGGCGTCAAAAAGCCGCATGCACGGTAGGTCTCACGGGATCGGTAAGGCTTGCGTGCAAACAACTCCATGTAGACCGAGTTCTGTCGCAGCACGTACCTGAAGGTTGATGTCCTCATCGTTATGTCGGTTTTCCGTCGCTTGGCGGACGGCTTTGCCTGTGCGTCNAAGTGCGGCCGTTCAGACGATGGGCATTACATACACGACGTGCTGAGGACGTTGACGTATCTGCGCCTCTATCCGAC…
Taylor & Rogers 2015, Molecular Phylogenetics & Evolution	KP324581.1	NA	Animalia	Cnidaria	Anthozoa	Scleralcyonacea	Primnoidae	Convexella	Convexella magelhaenica	yes	1	402	no	NA	NA	GAGAGTTAAAAAGTGCGTGAAACCGTTGGAAGRGAAGMGAATGGAGTCGGCAWGTCGCCTCGCNYGTTYGCGTTCGATCTTTCTAGGAAKCTTGCRCACGTGCGTCGCGCAMCCGGTGCACTTCCGCTTGGCGAATGTCAACGTCGGTTTGCGCGGAGTCAAAAAGCCGCGAACACGRTAGGGCGCTMGCGATCGGTAAGGCTTGCGAGCGAACGGCTTCACGTAGACCGAGTTAACTCGCAGCACGTACCTGCGGGTTGATGTCTTCGTGGCWGAGTASKTTTAACCTCSTCGGGCGGACGGCTTTGCCTGTGCGTCCGCGAGCGGCCTGTCAAACCACGGAGGAAGCASACAAGACGTGCTGAGCACGTTGCCTGCCCACCGGCTCCATCCGACCCG…
Taylor & Rogers 2015, Molecular Phylogenetics & Evolution	KP324582.1	NA	Animalia	Cnidaria	Anthozoa	Scleralcyonacea	Primnoidae	Armadillogorgia	Armadillogorgia sp.	yes	0	NA	no	NA	NA	GAGAGTTAAAAAGTGCGTGAAACCGTTGGAAGGGAAGCGAATAGAGTTTGCAATTCGTTGTCGTGCTCGCTTTCGATCTTTCTAGACGAGCCTTGCACGCTTGCGTTGCGTGACCGGTGCACTTCCGCTTGGCGAACGTCAACGTCGGTTTGCGCGCAGTTAAAAAGCTGCAAGCACGGTAGGTCCCTCGGGATCGGTAAGGCTTGCGTGCAAATAGCTTCGTGCAGACCGAGTTCTGTCGCAGCACGTACCTGCAGGTTGATGTCTTCGTCTTTGAGACGGTTTAACGTCGCTCGGCGGACGGCTCTGCCTGTGCGTCGACGTGCGGCCGCTCCAACGATGGGGGAAACAGACACGACGTGCTAAGGACGTTGACTGCTCGCCGGCTCTATCCGACCC…
Taylor & Rogers 2015, Molecular Phylogenetics & Evolution	KP324583.1	NA	Animalia	Cnidaria	Anthozoa	Scleralcyonacea	Primnoidae	Primnoidae_incertae_sedis	Primnoidae sp.	yes	0	NA	no	NA	NA	GAGAGTTAAAAAGTGCGTGAAACCGTTGGAAGGGAAGCGAATAGAGCTTGCAATTCGCCTTGTCGTGCTTCGATCTTTCTAGACGAGGCGTGCGCGTATGCGATGCGCGATTGCACTTCCGCTAGGCGAAAGTCAACGTCGGTTTTGGAAAAGTCAAAAAGCAGCGAGCACGGTAGATCTCTCGGGATCGGTAAGGCTTGCGTGCAAATGGCTTTGTTGAGACCGAGTTGCGTCGCAGCACGTACCTGTTGGTTGATGTCTTCGTCGATGAGTTGGTTTTACGTCTCTCGGCGGACGGCTTTGCCTGTGCGTCGGCGTGCGTCCGCTCAAACGACGGTGAACATACACACAACGTGCTAAGGACGTTGACTATGCGGCGGCTCTATCCGACCCGTCTTG…
Taylor & Rogers 2015, Molecular Phylogenetics & Evolution	KP324584.1	NA	Animalia	Cnidaria	Anthozoa	Scleralcyonacea	Primnoidae	Armadillogorgia	Armadillogorgia sp.	no	NA	NA	no	NA	NA	AGGAGTATAAAGTGCGTGAATCGTGGAAGGAAGTGAATAGAGTTGCAATCGCCTTGTCGTGCTCGCTTTCGATCTTTCTAGACGAGCCTTGCACGCTTGCGTTGCGTGACCGGTGCACTTCCGCTTGGCGAACGTCAACGTCGGTTTGCGCGCAGTTAAAAAGCTGCAAGCACGGTAGGTCCTTCGGGATCGGTAAGGCTTGCGTGCAAATAGCTTCGTGCAGACCGAGTTCTGTCGCAGCACGTACCTGCAGGTTGATGTCTTCGTCTTTGAGACGGTTTAACGTCGCTCGGCGGACGGCTCTGCCTGTGCGTCGACGTGCGGCCGCTCCAACGATGGGGGAAACAGACACGACGTGCTAAGGACGTTGACTGCTCGCCGGCTCTATCCGACCCGTCT…
Taylor & Rogers 2015, Molecular Phylogenetics & Evolution	KP324585.1	NA	Animalia	Cnidaria	Anthozoa	Scleralcyonacea	Primnoidae	Convexella	Convexella sp.	yes	0	NA	no	NA	NA	GAGAGTTAAAAAGTGCGTGAAACCGTTGGAAGGGAAGCGAATAGAGCTTGCAATTCGTTGTCGTGCTCGCTTTCGATCTTTCTAGACGAGGCGTGCGCGTATGCGATGCGCGATCGGTGCACTTCCGCTAGGCGAAAGTCAACGTCGGTTTTGAAAAAGTCAAAAAGCAGCGAGCACGGTAGATCTCTCGGGATCGGTAAGGCTTGCGTGCAAATGGCTTTGTTGAGACCGAGTTGCGTCGCAGCACGTACCTGTTGGTTGATGTCTTCGTCGATGAGTTGGTTTTACGTCTCTCGGCGGACGGCTTTGCCTGTGCGTCGGCGTGCGTCCGCTCAAACGACGGTGAACATACACACAACGTGCTAAGGACGTTGACTATGCGGCGGCTCTATCCGACCC…
Taylor & Rogers 2015, Molecular Phylogenetics & Evolution	KP324586.1	NA	Animalia	Cnidaria	Anthozoa	Scleralcyonacea	Primnoidae	Parastenella	Parastenella spinosa	yes	1	25	no	NA	NA	GAGAGATAAAGWGTGCGTGAAACCACTGGAAGGGAAGCGAATGGWGTTCGCAATTCGCCTTGTCGTGCTGCGCCTCGATCTTTCTAGACGAGCGTTGTGCGGTCGCGTTACGTGGGCGGTGCACTTCCGGACGGCGAAAGTCAACGTCGGTTTGCCGCGAGTTAAAAAGCTGCGAGCATGGTAGGTCCGTCCGGACCGGTAAGGCTTGCAAGCACRTGACTCGCGGCAGACTGATTATGTCGCAGCGCGTGCCTAAGGCTGCTGTCTTTATCGTTGAATCGGCACCATGTCACTGGACGGACGGCTCTGCCTGTGCGTCGGGGTGCTGCCGTTCAAACGACGAGGCAAACAGACACGACGCGCTGAGGACGTTGACCGCCCGGCGACTCCATCCGACCC…
Taylor & Rogers 2015, Molecular Phylogenetics & Evolution	KP324587.1	NA	Animalia	Cnidaria	Anthozoa	Scleralcyonacea	Primnoidae	Thouarella	Thouarella viridis	yes	0	NA	no	NA	NA	GAGAGTTAAAAAGTGCGTGAAACCGTTGGAAGGGAAGCGAATAGAGATAGAAATTCTTGGTCGTGCTCGGTTTCGATCTTTACAGACGAGCCTTGTACGCTTGCGTTGCGTGACCGGTGCACTTCCGCTTGGCGAATGTCAACGTCGGTTTGCGTGGAGTGAAAAAGCCGCATGCACGGTAGGTCCCACGGGATCGGTAAGGCTTGCGTGCAATCGACTCCATGTAGACCGAGTTCTGTCGCAGCACGTACCTGAAGGTTGATGTCCTCATCGTTATGTCGGTTTACCGTCGCTTGGCGGACGGCTTTGCCTGTGCGTTTAAGTGCGGCCGTTTAGACGATGCGCAATACATACACGACGTGCTGAGGACGTTGACGAGTCTGCGCCTCTATCCGACCC…
Taylor & Rogers 2015, Molecular Phylogenetics & Evolution	KP324588.1	NA	Animalia	Cnidaria	Anthozoa	Scleralcyonacea	Primnoidae	Primnoella	Primnoella chilensis	yes	0	NA	no	NA	NA	GAGAGTTAAAAAGTGCGTGAAACCGTTGGAAGGGAAGCGAATAGAGTTTGCAATTCGCCTTGTCGTGCATGCCCTCGATCTTTCTAGACGAGCCTTGCACGACTGCGTTGCGTGACCGGTGCACTTCCGCTTGGCGAAAGTCAACGTCGGTTTGCGCGGAGTTAGAAAGCTGCAAGCACGGTAGATCTTTCGGGATCGGTAAGGTTTGCGTGCAAATAGCTTCGTGCGGACCGAGTTCTGTCGCAGCACGTACCTGCAGGTTGATGTCTTCGTCTTTGACACGGTTTAACGTCGCTCGACGGACGGCTTTGCCTGTGCGTTGGCGTGCGGCCGCTCAAACGATGGAGGAAACAGACACGACGTGCTAAGGACGTTGACTGCTCGGCGGCTCTATCCGAC…
Taylor & Rogers 2015, Molecular Phylogenetics & Evolution	KP324589.1	NA	Animalia	Cnidaria	Anthozoa	Scleralcyonacea	Primnoidae	Primnoella	Primnoella scotiae	yes	0	NA	no	NA	NA	GAGAGTNAAAAAGTGCGTGAAACCGTTGGAAGGGAAGCGAATAGAGCTTGCAATTCGTTGTCGTGCTCGCTTTCGATCTTTCTAGACGAGACGTGCGCGCATGCGATGCGAGATCGGTGCACTTCCGCTAGGCGAAAGTCAACGTCGGTTTTGGCGAAGTCAAAAAGCAGCGAGCACGGTAGATCTCTCGGGATCGGTAAGGCTTGCGTGCAAATGGCTTTGTTGAGACCGAGTTGCGGCGCAGCACGTACCTGTTGGTTGATGTCGTCGTCGATGAGCTGGTTTTACGCCGCTAGTCGGACGGCTTTGCCTGTGCGTCGGCGTGCGTCCGCTCAAACGACGGCGAACATATACACCACGTGCTAAGGACGTTGACTATGCGGCGGCTCTATCCGACCC…
Taylor & Rogers 2015, Molecular Phylogenetics & Evolution	KP324590.1	NA	Animalia	Cnidaria	Anthozoa	Scleralcyonacea	Primnoidae	Primnoella	Primnoella scotiae	yes	0	NA	no	NA	NA	AAGTGCGTGAAACCGTTGGAAGGGAAGCGAATAGAGCTTGCAATTCGCCTTGTCGTGCTCGCTTTCGATCTTTCTAGACGAGACGTGCGCGCATGCGATGCGAGATCGGTGCACTTCCGCTAGGCGAAAGTCAACGTCGGTTTTGGCGAAGTCAAAAAGCAGCGAGCACGGTAGATCTCTCGGGATCGGTAAGGCTTGCGCGCAAATGGCTTTGTTGAGACCGAGTTGCGGCGCAGCACGTACCTGTTGGTTGATGTCGTCGTCGATGAGCTGGTTTTACGCCGCTAGGCGGACGGCTTTGCCTGTGCGTCGGCGTGCGTCCGCTCAAACGACGGCGAACATATACACCACGTGCTAAGGACGTTGACTATGCGGCGGCTCTATCCGACCCGTCTTGAA…
Taylor & Rogers 2015, Molecular Phylogenetics & Evolution	KP324591.1	NA	Animalia	Cnidaria	Anthozoa	Scleralcyonacea	Primnoidae	Plumarella	Plumarella cf. delicatissima	yes	1	18	no	NA	NA	GAGAGTTAAAAAGTACGCGAAACCGTTGAAAGGGAAGCGAATAGAGCTGACAATTCCCCTTGGCGTAGGTTTTAGACGCCTTGGACGTTTGCTTTGCCTGAACGGCGCACTTCCGCTTGGCGAAAGTCAACGTCGGTTTGCGCGAGTGTCAAAAAGAGCAAGCACGGTAGGTCTTACGGGATCGGTAAGGTTTGCTTGCAAATGACTTCATGCAGACCGAGTTCTGTCGCAGTACGTACCTGTAGGTTGAYGTCTTCGTTGTTGAGTCGGTTTAACGTCGCTGGACGGACGGCYTTGCCTGTGCGTCTGCGTGCGGCCGCTCAGACGATGGGGAAAACAGACACGACGTGCTGAGGACGTTGGCAATTCCGCGGCTCTATCCGACCCGTCTTGAAACAC…
Taylor & Rogers 2015, Molecular Phylogenetics & Evolution	KP324592.1	NA	Animalia	Cnidaria	Anthozoa	Scleralcyonacea	Primnoidae	Thouarella	Thouarella chilensis	yes	0	NA	no	NA	NA	GAGAGTTAAAAAGTACGTGAAACCGTTGAAAGGGAAGCGAATAGAGATAGAAATTCCCCTGGCTGCTCATCTTTATAGACGAACCTTGTACGCTTGCGTTGCGTGACCGGTGCACTTCCGCTTGGCGAATGTCAACGTCGGTTTGCGTGGCGTCAAAAAGCCGCATGCACGGTAGGTCTCACGGGACCGGTAAGGCTTGCGTGCAAACGACTCCATGTAGACCGAGTTCTGTCGCAGCACGTACCTGAAGGTTGATGTCCTCATCGTTATGTCGGTTTACCGTCACTTGGCGGACGGCTTTGCCTGTGCGTCNAAGTGCGGCCGTTCAGACGATGGGAAATACATACACGACGTGCTGAGGACGTTGACGATTCTGCGCCTCTATCCGACCCGTCTTGA…
Taylor & Rogers 2015, Molecular Phylogenetics & Evolution	KP324593.1	NA	Animalia	Cnidaria	Anthozoa	Scleralcyonacea	Primnoidae	Primnoella	Primnoella antarctica	yes	0	NA	no	NA	NA	GAGAGTTAAAAAGTGCGTGAAACCGTTGGAAGGGAAGCGAATAGAGCTTGCAATTCGCCTTGCGTGCTTCGATCTTTCTAGACGAGGCGTGCGCGTATGCGATGCGCTCGTGCACTTCCGCTAGGCGAAAGTCAACGTCGGTTTTGGCAAAGTCAAAAAGCAGCGAGCACGGTAGATCTCTCGGGATCGGTAAGGCTTGCGTGCAAATGGCTTTGTTGAGACCGAGTTGGGTCGCAGCACGTACCTGTTGGTTGATGTCTTCGTCGTTGAGTTGGTTTTACGTCGCTCGGCGGACGGCTTCGCCTGTGCGTCGGCGTGCGGCCGCTGAAACGATGTTGAACGTATACACCACGTGCTAAGGACGTTGACTATGCGGCGGCTCTATCCGACCCGTCTTGA…
Taylor & Rogers 2015, Molecular Phylogenetics & Evolution	KP324594.1	NA	Animalia	Cnidaria	Anthozoa	Scleralcyonacea	Primnoidae	Primnoella	Primnoella antarctica	yes	0	NA	no	NA	NA	GAGAGTTAAAAAGTGCGTGAAACCGTTGGAAGGGAAGCGAATAGAGCTTGCAATTCGCCTTGTCGCTCACTAGACGAGGCGTGCGCGTATGCGATGCGCGATTGCACTTCCGCTAGGCGAAAGTCAACGTCGGTTTTGGCAAAGTCAAAAAGCAGCGAGCACGGTAGATCTCTCGGGATCGGTAAGGCTTGCGTGCAAATGGCTTTGTTGAGACCGAGTTGGGTCGCAGCACGTACCTGTTGGTTGATGTCTTCGTCGTTGAGTTGGTTTTACGTCGCTCGGCGGACGGCTTCGCCTGTGCGTCGGCGTGCGGCCGCTGAAACGATGTTGAACGTATACACCACGTGCTAAGGACGTTGACTATGCGGCGGCTCTATCCGACCCGTCTTGAAACACGGA…
Taylor & Rogers 2015, Molecular Phylogenetics & Evolution	KP324595.1	NA	Animalia	Cnidaria	Anthozoa	Scleralcyonacea	Primnoidae	Onogorgia	Onogorgia nodosa	yes	0	NA	no	NA	NA	GAGAGTTAAAAAGTGCGTGAAACCGTTGGAAGGGAAGCGAATAGAGTGTGCAATTCGCCCTGTCGCGCTCGATCTTTCGAGACGATGCTTGCGCGCTTGCGATACGCGTCCGGTGCACTTCCGCTGGGCGATAGTCAACGTCGGTTTGCGGAGTTAGAAAGCCGCGAGCACGATAGATCTCTCGGGATCGGTAAGGCTTGCGTGCACATGGCTCGGTCAGACCGAGTTTTGTCGCAGCACGTACCTGCAGGTTGACGCCTTCGTGGTCGACACGGTTTAACGTCGCCTGGCGGACGGCTTTGCCTGTGCGTCGGCGTGCGGCCGCTCGAACGGCGGGGAGTGCGTACACCACGTGCTGAGGACGTTGACTCCACGGCGCCTCTATACGACCCGTCTTGA…
Taylor & Rogers 2015, Molecular Phylogenetics & Evolution	KP324596.1	NA	Animalia	Cnidaria	Anthozoa	Scleralcyonacea	Primnoidae	Onogorgia	Onogorgia nodosa	yes	0	NA	no	NA	NA	GAGAGTTAAAAAGTGCGTGAAACCGTTGGAAGGGAAGCGAATAGAGTGTGCAATTCGCTGTCGCGCTAGCCTTCGATCTTTCGAGACGATGCTTGCGCGCTTGCGATACGCGTCCGGTGCACTTCCGCTGGGCGATAGTCAACGTCGGTTTGCGCGGAGTTAGAAAGCCGCGAGCACGATAGATCTCTCGGGATCGGTAAGGCTTGCGTGCACATGGCTTCGGTCAGACCGAGTTTTGTCGCAGCACGTACCTGCAGGTTGACGCCTTCGTGGTCGACACGGTTTAACGTCGCCTGGCGGACGGCTTTGCCTGTGCGTCGGCGTGCGGCCGCTCGAACGGCGGGGAGTGCGTACACCACGTGCTGAGGACGTTGACTCCACGGCGCCTCTATACGACCC…
Taylor & Rogers 2015, Molecular Phylogenetics & Evolution	KP324597.1	NA	Animalia	Cnidaria	Anthozoa	Scleralcyonacea	Primnoidae	Onogorgia	Onogorgia nodosa	yes	1	32	no	NA	NA	GAGAGTTAAAAAGTGCGTGAAACCGNTGGAAAGGAAGCGAATAGAGTGTGCAATTCGCCCTGTCGCGCTCGATCTTTCGAGACGATGCTTGCGCGCTTGCGATACGCGTCCGGTGCACTTCCGCTGGGCGATAGTCAACGTCGGTTTGCGCGGAGTTAGAAAGCCGCGAGCACGATAGATCTCTCGGGATCGGTAAGGCTTGCGTGCACATGGCTCGGTCAGACCGAGTTTTGTCGCAGCACGTACCTGCAGGTTGACGCCTTCGTGGTCGACACGGTTTAACGTCGCCTGGCGSACGGCTTTGCCTGTGCGTCGGCGTGCGGCCGCTCGAACGGCGGGGAGTGCGTACACCACGTGCTGAGGACGTTGACTCCACGGCGCCTCTATACGACCCGTCTT…
Taylor & Rogers 2015, Molecular Phylogenetics & Evolution	KP324598.1	NA	Animalia	Cnidaria	Anthozoa	Scleralcyonacea	Primnoidae	Dasystenella	Dasystenella acanthina	yes	0	NA	no	NA	NA	GAGAGTTAAAAAGTGCGTGAAACCGCTGGAAGGGAAGCGAATGGAGTCGGCAATTCGCCTCGGCGCGTTCGATCTTTCTAGACGAAGCTTGCGCACGTGCGTCGCGCAACCGGTACTTCCGCTTGGCGAAAGTCAACGTCGGTTGCGCGGAGTCAAAAAGCCGCGAGCACGGTAGGTCGCTCGCGATGCTTGCGAGCGAACGGCTTCACGTAGACCGAGTTAAGTCGCAGCACGTACCTGCAGGTTGATGTCTTCGTAGCTGAGTAGGTTTAACCTCGCCGCGCGGACGGCTTTGCCTGTGCGTCGGCGAGCGACCTGTCAAGCCACGGAGGAAGCAGACACGACGTGCTGAGCACGTTGGCTGCCCACCGGCTCCATCCGACCCGTCTTGAAACACGG…
Taylor & Rogers 2015, Molecular Phylogenetics & Evolution	KP324599.1	NA	Animalia	Cnidaria	Anthozoa	Scleralcyonacea	Primnoidae	Primnoeides	Primnoides kuekenthali	yes	0	NA	no	NA	NA	GAGAGTTAAAAAGTGCGTGAAACCGTTGGAAGGGAAGCGAATAGAGTTTGAAATTCGCCCTGCCGCTCATCTTCCTAGACGAGGCTGGCGCGCTTGCGTTCCGCGATCGGTGCACTTCCGCTTGGCGAAAGTCAACGTCGGTTTGCGCGGAGTTGCAAAGCTGCAAGCACGGTAGATCTCTCGGGATCGGTAAGGCTTGCGTGCAAATGGCTTCGTTCGGACCGAGTCGTGTCGCAGCACGTACCTGCTGGTTGACGTCTTCGTCGTCGAGTCGGTTTCACGGCGCCTGGCGGACGGCTTTGCCTGTGCGTCGGCGTGCGGCCGCTCTAACGATGGAGAAAGCGTACACCACGTGCTAAGGACGTTGACTGCTCGGCAGCTCTATACGACCCGTCTTGA…
Taylor & Rogers 2015, Molecular Phylogenetics & Evolution	KP324600.1	NA	Animalia	Cnidaria	Anthozoa	Scleralcyonacea	Primnoidae	Convexella	Convexella cf. magelhaenica	yes	0	NA	no	NA	NA	GAGAGTTAATAAGTGCGTGAAACCGTTGGAAGGGAAGCGAATAGAGCTTGCAATTCGCCTTGCTCGCTTTCGATTTCTAGACGAGGCGTGCGCGTATGCGATGCGCGATCGGTGCACTTCCGCTAGGCGAAAGTCAACGTCGGTTTTGGAAAAGTCAAAAAGCAGCGAGCACGGTAGATCTCTCGGGATCGGTAAGGCTTGCGTGCAAATGGCTTTGTTGAGACCGAGTTGCGTCGCAGCACGTACCTGTTGGTTGATGTCTTCGTCGATGAGTTGGTTTTACGTCTCTCGGCGGACGGCTTTGCCTGTGCGTCGGCGTGCGTCCGCTCAAACGACGGTGAACATACACACAACGTGCTAAGGACGTTGACTATGCGGCGGCTCTATCCGACCCGTCTT…
Taylor & Rogers 2015, Molecular Phylogenetics & Evolution	KP324601.1	NA	Animalia	Cnidaria	Anthozoa	Scleralcyonacea	Primnoidae	Primnoella	Primnoella cf. delicatissima	yes	0	NA	no	NA	NA	TAGAGAGAAAAAGTGCGTGAAACCGTTGGAAGGGAAGCGAATAGAGTTTGCAATTCGTTGTCTCGTGCTTGCTTTCGATCTTTCCAGACGAGGCAATTGCACGCTTGAGATGCGATCGGTGCACTTCCGCTTGGCGAATGTCAACGTCGGTTTGCGCGGRGTCAGAAAGCTGCAAGCACGGTAGATCTCTCGGGATCGGTATGGCTTGCGTGCAGATGGCTTCGTACGGACCGAGTTGTGTCGCAGCACGTACCTGCTGGTTGATGTCTTCGTCTTTGAGTCGGTTTAACGTCGCCTGGCGGACGGCTTTGCCTGTGCGTCGGCGTGCGGCCGCTCATGCGATGGAGGAAACAGACACCACGTGCTAAGGACGTTGACTTATCCGCGCCTCTATCCGAC…
Taylor & Rogers 2015, Molecular Phylogenetics & Evolution	KP324602.1	NA	Animalia	Cnidaria	Anthozoa	Scleralcyonacea	Primnoidae	Primnoella	Primnoella cf. delicatissima	yes	0	NA	no	NA	NA	GAGAGTTAAAAAGTGCGTGAAACCGTTGGAAGGGAAGCGAATAGAGTTTGCAATTCGTTGTCGTGCTTGCTTTCGATCTTTCCAGACGAGGCATGCACGCTTGAGATGCCCGATCGGTGCACTTCCGCTTGGCGAATGTCAACGTCGGTTTGCGCGGRGTCAGAAAGCTGCAAGCACGGTAGATCTCTCGGGATCGGTATGGCTTGCGTGCAGATGGCTTCGYACGGACCGAGTTGTGTCGCAGCACGTACCTGGCTGTTGATGTCTTCGTCKTTGAGTCGGTTTAACGTCGCCTGGCGGACGGCTTTGCCTGTGCGTCGGCGTGCGGCCGCTCATGCGATGGAGGAAACAGACACCACGTGCTAAGGACGTTGACTTATCCGCGCCTCTATCCGACCC…
Taylor & Rogers 2015, Molecular Phylogenetics & Evolution	KP324603.1	NA	Animalia	Cnidaria	Anthozoa	Scleralcyonacea	Primnoidae	Primnoella	Primnoella divaricata	yes	0	NA	no	NA	NA	GAGAGTTAACAAGTGCGTGAAACCGTTGGAAGGGAAGCGAATAGAGTTTGCAATTCGTTGTCGTGCTTGCTTTCGATCTTTCCAGACGARGCATGCACGCTTGAGATGCCCGATCGGTGCACTTCCGCTTGGCGAATGTCAACGTCGGTTTGCGCGGGGTCAGAAAGCTGCAAGCACGGTAGATCTCTYGGGATCGGTATGGCTTGCGTGCAGATGGCTTCGTACGGACCGAGTTGTGTCGCAGCACGTACCTGCTGGATGATGTCTTCGTCTGTGAGTCKKTTTAACGTCGCCTGGCGGACGGTTTCGCCTGTGCGTCGGCSTGCRGCCGCTCATGAGATGGAAAAAACACACACCACGTGCTAAGGACGTTGACTTATCCGCGCCTCTATCCGACCC…
Taylor & Rogers 2015, Molecular Phylogenetics & Evolution	KP324604.1	NA	Animalia	Cnidaria	Anthozoa	Scleralcyonacea	Primnoidae	Metafannyella	Metafannyella kuekenthali	yes	0	NA	no	NA	NA	GAGAGTTAAAAAGTACGTGAAACCGTTGGAAGGGAAGCGAATAGAGTTTGCAATTCGCCTCGTCGCGCTTGCTTTCGATCTTTCTAGACGAAACTTGCACGCCCGCGTTACGTGACCGGTGCATTTCCGCTTGGCGAAAGTCAGCGTCGGTTTGCGAGGAGCGAAAAAGCCGCAAGCACGGTAGGCCTCTTGGGATCGGTAAGGCTTGTGTGCAAATGGCTTCACGTAGACCGAGGTCTGCGGCAGCACGAACCTGCTGGTTGATGTCCTCGTTTTTACGTCGGTTTGACGTTGCCGGACGGACGGCTTTGCCTGTGCGTCCGTGCGCGTTCCTTCGAACGAATGAGAAAACAGACACGACGTGCTGAAGACGCTGCCTTCTGGCTGGCTCTATCCGAC…
Taylor & Rogers 2015, Molecular Phylogenetics & Evolution	KP324605.1	NA	Animalia	Cnidaria	Anthozoa	Scleralcyonacea	Primnoidae	Thouarella	Thouarella chilensis	yes	0	NA	no	NA	NA	GAGAGTTAAAAAGTGCGTGAAACCGTTGGAAGGGAAGCGAATAGAGATAGAAATTCTCCTGGTCGTGCCGATCTTTATAGACGAGCCTTGTACGCTTGCGTTGCGTGACCGGTGCACTTCCGCTTGGCGAATGTCAACGTCGGTTTGCGTGGAGTGAAAAAGCCGCATGCACGGTAGGTCCCACGGGATCGGTAAGGCTTGCGTGCAATCGACTCCACATAGACCGAGTTCTGTCGCAGCACGTACCTGAAGGTTGATGTCCTCATCGTTATGTCGGTCTACCGTCGCTTGGCGGACGGCTTTGCCTGTGCGTTTAAGTGCGGCCGTTTAGACGATGTGCAATACATACACGACGTGCTGAGGACGTTGACGATTCTGCGCCTCTATCCGACCCGTCTT…
Taylor & Rogers 2015, Molecular Phylogenetics & Evolution	KP324606.1	NA	Animalia	Cnidaria	Anthozoa	Scleralcyonacea	Primnoidae	Thouarella	Thouarella diadema	yes	0	NA	no	NA	NA	GAGAGTTAAAAAGTACGTGAAACCGTTGGAAGGGAAGCGAATAGAGATAGAAATTCCCCTCGGCGTGCTTGTTTTTAGACGAGCCTTGTACGCTTGCGTTGCGTGACCGGTGCACTTCCGCGTGGCGAATGTCAACGTCGGTTTGCGTGGTGCCAAAAAGCCGCATGCACGGTAGGTCTCACGGGATCGGTAAGGCTTGCGTGCAAACGACTCCATGTAGACCGAATTCTGTCGCAGCACGTACCTGAACGTTGATGTCCTCATCGTTATGTCGGTTTACCGTCGCTTGGCGGACGGCTTTGCCTGTGCGTCAAGTGCGGCCGTTTAGACGATGGGAAATACATACACGACGTGCTGAGGACGTTGACGATTCTGCGCCTCTATCCGACCCGTCTTGAA…
Taylor & Rogers 2015, Molecular Phylogenetics & Evolution	KP324607.1	NA	Animalia	Cnidaria	Anthozoa	Scleralcyonacea	Primnoidae	Thouarella	Thouarella undulata	yes	0	NA	no	NA	NA	GAGAGTTAAAAAGTACGTGAAACCGTTGGAAGGGAAGCGAATAGAGATAGAAATTCCCCTTGGCGTGCTCGATCTTCATAGACGAGCCTTGTACGCTTGCGTTGCGTGACCGGTGCACTTCCGCTTGGCGAATGTCAACGTCGGTTTGCGTGGCGTGAAAAAGCCGCATGCACGGTAGGTCCCACGGGGTCGGAAAGGCTTGCGTGCAAATGACTTCACGTAGACCGAGTTCTGTCGCAGCACGTACCTGCAGGTTGATGTCTTCATCGTTATGTCGGTTTACCGTCGCTTGACGGACGGCTTTGCCTGTGCGTTCAAGCGCAGCCGTTTAGACGATGGGCAATACATACACGACGTGCTGAGGACGTTGACGATTCTGCGCCTCTATCCGACCCGTCT…
Taylor & Rogers 2015, Molecular Phylogenetics & Evolution	KP324608.1	NA	Animalia	Cnidaria	Anthozoa	Scleralcyonacea	Primnoidae	Thouarella	Thouarella crenelata	yes	0	NA	no	NA	NA	GAGAGTTAAAAAGTGCGTGAAACCGTTGGAAGGGAAGCGAATAGAGATAGAAATTCTTGGCCGTGCTCGGTTTCGATCTTTATAGACGAGCCTTGTACGCTTGCGTTGCGTGACCGGTGCACTTCCGCTTGGCGAATGTCAACGTCGGTTTGCGTGGCGTGAAAAAGCCGCATGCACGGTAGGTCCCTCGGGATCGGTAAGGCTTGCGTGCAATCGACTCCACGTAGACCGAGTTATGTCGCAGCACGTACCTGAAGGTTGATGTCCTCATCGTTATGTCGGTTTACCGTCGCTTGGCGGACGGCTTTGCCTGTGCGTTTAAGTGCGGCCGTTTAAACGATGCGCAATACATACACGACGTGCTGAGGACGTTGACGATTCTGCGCCTCTATCCGACCC…
Taylor & Rogers 2015, Molecular Phylogenetics & Evolution	KP324609.1	NA	Animalia	Cnidaria	Anthozoa	Scleralcyonacea	Primnoidae	Thouarella	Thouarella antarctica	yes	0	NA	no	NA	NA	GAGAGTTATAAAGTGCGTGAAACCGTTGGAAGGGAAGCGAATAGAGATAGAAATTCTCCTGGTCGTGCTCGGTTTCGATCTTTATAGACGAGCCTTGTACGCTTGCGTTGCGTGACCGGTGCACTTCCGCTTGGCGAATGTCAACGTCGGTTTGCGTGGAGTGAAAAAGCCGCATGCACGGTAGGTCCCACGGGATCGGTAAGGCTTGCGTGCAATCGACTCCACATAGACCGAGTTCTGTCGCAGCACGTACCTGAAGGTTGATSTCCTCRTCGTTATGTCKGTCTACCGTCGCTTGGCGGACGGCTTTGCCTGTGCGTTTAMGTGCGGCCGTKTAGACGATGTGCAATACATACACGACGTGCTGAGGACGTTGACGATTCTGCGCCTCTATCCGAC…
Taylor & Rogers 2015, Molecular Phylogenetics & Evolution	KP324610.1	NA	Animalia	Cnidaria	Anthozoa	Scleralcyonacea	Primnoidae	Parastenella	Parastenella cf. ramosa	yes	2	25, 20	no	NA	NA	GAGAGTGTTAAAGWGCGYGTAACCACTGGAAGGGAAGCGAATGGAGTTCGCAATTCGCCTTGCCGTGCTTCGCSTCGATCTTTCTAGGAGCGTTGTGCGGTCGCGTTACGTGGGCGGTGCACTTCCGGACGGCGAAAGTCAACGTCGGTTTGCCGCGAGTTACAAAGCTGCGAGCATGGTAGGTCCATCCGGATCGGTAAGGCTTGCATGCACATGACTCGCTGCAGACTGAATTCTGTCGCAGCGCGTGCCTGCTGCTGTCTTCATCGTTGAATCGGCACAATCTCACTGGACGGACGGCTTTGCCTGTGCGTCGGGGTGCGGCCGTTCAAACGACGATGCAAACAGACACGACGCGCTGAGGACGTTGACCGCCCGGCGACTCCATCCGACCCGTCT…
Taylor & Rogers 2015, Molecular Phylogenetics & Evolution	KP324611.1	NA	Animalia	Cnidaria	Anthozoa	Scleralcyonacea	Chrysogorgiidae		Chrysogorgiidae sp.	yes	0	NA	no	NA	NA	GAGAGTTAAAAAGTACGTGAAACCGTTGGAAGGGAAGCGAATGGAGTCGGCAATTCGCCTCGACGTGCTCTCTCGCGACCTGTTCAGGCGCGAATTGCGCGGTCGCGTTACGCGTGTGGTGCACTTCGGCGGGCGAGCGTCAACGCCAGTCAACCGCGAGTTACAAAGCTGCAAGCACGGTACATTCTTCGGAATGGGTAAGTCTTGCCTGCGCACGACTCGCGCGAGACTGTCCTCTGTCGCAGCGTGTACCGAGGCTGCTGCCTTCGTTGTCGATCCGGTCGTGCTGTCCGGCGGACGGCTGTGCCTGTGCGTCGGCGGTGCCGATCAACTGACCTAGTCGCAGACACGACACGCTCAGTACGTTGACCGACCTGCGTCTCCATCCGACCCGTCTTG…
Taylor & Rogers 2015, Molecular Phylogenetics & Evolution	KP324612.1	NA	Animalia	Cnidaria	Anthozoa	Scleralcyonacea	Primnoidae	Primnoeides	Primnoeides sertularoides	yes	0	NA	no	NA	NA	GAGAGTTAAAAAGTGCGTGAAACCGTTGGAAGGGAAGCGAATAGAGTTTGAAATTCGCCCTGTCGGCTTCATCTTCCCAGACGACGCTTGCACGCTTGCGTTCCGCGATCGGTGCACTTCCGCTTGGCGAACGTCAACGTCGGTTTGCGCGGAGTCGGAAAGCCGCAAGCACGGTAGATCTCTCGGGATCGGTAAGGCTTGCGCGCAAATGGCTTCGTTCGGACCGAGTTGTGTCGCAGCACGTACCTGCTGGTTGACGTCTTCGTCGTCGAGTCGGTTTCACGGCGCCTGGCGGACGGCTTTGCCTGTCCGCCGGCGTGCGGCCGCTCAAGCGACGGAGAAAGCGTACACCACGTGCTAAGGACGTTGACTGCTCGGCAGCTCTATACGACCCGTCTT…
Taylor & Rogers 2015, Molecular Phylogenetics & Evolution	KP324614.1	NA	Animalia	Cnidaria	Anthozoa	Scleralcyonacea	Primnoidae	Primnoeides	Primnoeides sertularoides	yes	0	NA	no	NA	NA	GAGAGTTAAAAAGTGCGTGAAACCGTTGGAAGGGAAGCGAATAGAGTTTGAAATTCGCCCTGTCGCGCTTTTCGATCTTCCCAGACGACGCTTGGCTTGCGTTCCGCGATCGGTGCACTTCCGCTTGGCGGTCAACGTCGGTTTGCGCGGAGTCGGAAAGCCGCAAGCACGGTAGATCTCTCGGGATCGGTAAGGCTTGCGCGCAAATGGCTTCGTTCGGACCGAGTTGTGTCGCAGCACGTACCTGCTGGTTGACGTCTTCGTCGTCGAGTCGGTTTCACGGCGCCTGGCGGACGGCTTTGCCTGTCCGCCGGCGTGCGGCCGCTCAAGCGACGGAGAAAGCGTACACCACGTGCTAAGGACGTTGACTGCTCGGCAGCTCTATACGACCCGTCTTGA…
Taylor & Rogers 2015, Molecular Phylogenetics & Evolution	KP324615.1	NA	Animalia	Cnidaria	Anthozoa	Scleralcyonacea	Primnoidae	Primnoeides	Primnoeides sertularoides	yes	0	NA	no	NA	NA	GAGAGTTAANAAGTGCGTGAAACCGTTGGAAGGGAAGCGAATAGAGTTGGAATTCCCCGTCGCGCTTGCTTCCAGTCTTCCAGACGACGCTKGCACGCTTGCGTTCCGCGATCGGGGCACTTCCGCTTGGSAAACGTCAACGTCGGTTTGCGCGGAGTCGGAAAGCCGCAAGCACGGTAGATCTCTCGGGATCGGTAAGGCTTGCGCGCAAATGGCTTCGTTCGGACCGAGTTGTGTCGCAGCACGTACCTCTGGTTGACGTCTTCCTCGTCGAGTCGGTTTCACGGCGCCTGGCCGACGGCTTTGCCTGTCCGCCGGCGTGCGCCGCTCAAGCGACGGAGAAAGCGTACACCACGTGCTAAGGACGTTGACTGCTCGGCAGCTCTATACGACCCGTCT…
Taylor & Rogers 2015, Molecular Phylogenetics & Evolution	KP324616.1	NA	Animalia	Cnidaria	Anthozoa	Scleralcyonacea	Primnoidae	Primnoeides	Primnoeides sertularoides	yes	0	NA	no	NA	NA	GAGAGTTAAAAAGTGCGTGAAACCGTTGGAAGGGAAGCGAATAGAGTTTGAAATTCGCCCTGTCGCGCTTGCTTTCGATCTTCCCAGACGACGCTTGCACGCTTGCGTTCCGCGATCGGTGCACTTCCGCTTGGCGAACGTCAACGTCGGTTTGCGCGGAGTCGGAAAGCCGCAAGCACGGTAGATCTCTCGGGATCGGTAAGGCTTGCGCGCAAATGGCTTCGTTCGGACCGAGTTGTGTCGCAGCACGTACCTGCTGGTTGACGTCTTCGTCGTCGAGTCGGTTTCACGGCGCCTGGCGGACGGCTTTGCCTGTCCGCCGGCGTGCGGCCGCTCAAGCGACGGAGAAAGCGTACACCACGTGCTAAGGACGTTGACTGCTCGGCAGCTCTATACGAC…
Taylor & Rogers 2015, Molecular Phylogenetics & Evolution	KP324617.1	NA	Animalia	Cnidaria	Anthozoa	Scleralcyonacea	Primnoidae	Primnoeides	Primnoeides sertularoides	yes	0	NA	no	NA	NA	GAGAGTTAAAAAGTGCGTGAAACCGTTGGAAGGGAAGCGAATAGAGTTTGAAATTCGCTGCGCGCTTGCTTTCGATCTTCCCAGACGACGCTTGCACGCTTGCGTTCCGCGATCGGTGCACTTCCGCTTGGCGAACGTCAACGTCGGTTTGCGCGGAGTCGGAAAGCCGCAAGCACGGTAGATCTCTCGGGATCGGTAAGGCTTGCGCGCAAATGGCTTCGTTCGGACCGAGTTGTGTCGCAGCACGTACCTGCTGGTTGACGTCTTCGTCGTCGAGTCGGTTTCACGGCGCCTGGCGGACGGCTTTGCCTGTCCGCCGGCGTGCGGCCGCTCAAGCGACGGAGAAAGCGTACACCACGTGCTAAGGACGTTGACTGCTCGGCAGCTCTATACGACCCG…
Taylor & Rogers 2015, Molecular Phylogenetics & Evolution	KP324618.1	NA	Animalia	Cnidaria	Anthozoa	Scleralcyonacea	Primnoidae	Primnoeides	Primnoeides sertularoides	yes	0	NA	no	NA	NA	GAGAGTTAAAAAGTGCGTGAAACCGTTGGAAGGGAAGCGAATAGAGTTTGAAATTCGCCCTGTCGCGCTCGATCTTCCCAGACGACGCTTGCACGCTTGCGTTCCGCGATCGGTGCACTTCCGCTTGGCGAACGTCAACGTCGGTTTGCGCGGAGTCGGAAAGCCGCAAGCACGGTAGATCTCTCGGGATCGGTAAGGCTTGCGCGCAAATGGCTTCGTTCGGACCGAGTTGTGTCGCAGCACGTACCTGCTGGTTGACGTCTTCGTCGTCGAGTCGGTTTCACGGCGCCTGGCCGACGGCTTTGCCTGTCCGCCGGCGTGCGGCCGCTCAAGCGACGGAGAAAGCGTACACCACGTGCTAAGGACGTTGACTGCTCGGCAGCTCTATACGACCCGTCT…
Taylor & Rogers 2015, Molecular Phylogenetics & Evolution	KP324619.1	NA	Animalia	Cnidaria	Anthozoa	Scleralcyonacea	Primnoidae	Primnoeides	Primnoeides sp.	yes	0	NA	no	NA	NA	GAGAGTTAAAAAGTGCGTGAAACCGTTGGAAGGGAAGCGAATAGAGTTTGAAATTCGCCCTGTCGCGCTTGCTTTCGATCTTCCAGACGATTGCACGCTTGCGTTCCGCGATCGGTGCACTTCCGCTTGGCGAACGTCAACGTCGGTTTGCGCGGAGTCGGAAAGCCGCAAGCACGGTAGATCTCTCGGGATCGGTAAGGCTTGCGCGCAAATGGCTTCGTTCGGACCGAGTTGTGTCGCAGCACGTACCTGCTGGTTGACGTCTTCGTCGTCGAGTCGGTTTCACGGCGCCTGGCCGACGGCTTTGCCTGTCCGCCGGCGTGCGGCCGCTCAAGCGACGGAGAAAGCGTACACCACGTGCTAAGGACGTTGACTGCTCGGCAGCTCTATACGACCCGT…
Taylor & Rogers 2015, Molecular Phylogenetics & Evolution	KP324620.1	NA	Animalia	Cnidaria	Anthozoa	Scleralcyonacea	Primnoidae	Primnoa	Primnoa sp.	yes	1	25	no	NA	NA	GAGAGTTAAAAAGTGCGTGAAACCACTGGAAGGGAAGCGAATGGAGTTCGCAATTCGCCTTGTCGTGTTCGATCTTTCTAGACGAGCGTTGTGCGGTCGCGTTACGTGGGCGGTGCACTTCCGGACGGCGAAAGTCAACGTCGGTTTGCCGCGAGTTAAAAAGCTGCGAGCACGGTAGGTCCGTCCGGATCGGTAAGGCTTGCATGCACAATGACTCCTGCAGACTGAATTCTGTTGCAGCGCGTGCCTGCAGGCTGCTGTCTTTGTCGTTGAATCGGTGTAATGTCGCTGGACGGACGGCTTTGCCTGTGCGTCGTGGTGCGGCCGTTCAAACGACGAGGCAAACAGACACGACGCGCTGAGGACGTTGACCGCCCGGCGACTCCATCCGACCCGTCT…
Taylor & Rogers 2015, Molecular Phylogenetics & Evolution	KP324621.1	NA	Animalia	Cnidaria	Anthozoa	Scleralcyonacea	Primnoidae	Primnoeides	Primnoeides sp.	yes	0	NA	no	NA	NA	GAGAGTTAAAAAGTGCGTGAAACCGTTGGAAGGGAAGCGAATAGAGTTTGAAATTCGCCCTGTCGCGCTTCGATCTTCCCAGACGACGCTTGCACGCTTGCGTTCCGCGATCGGTGCACTTCCGCTTGGCGAACGTCAACGTCGGTTTGCGCGGAGTCGGAAAGCCGCAAGCACGGTAGATCTCTCGGGATCGGTAAGGCTTGCGCGCAAATGGCTTCGTTCGGACCGAGTTGTGTCGCAGCACGTACCTGCTGGTTGACGTCTTCGTCGTCGAGTCGGTTTCACGGCGCCTGGCCGACGGCTTTGCCTGTCCGCCGGCGTGCGGCCGCTCAAGCGACGGAGAAAGCGTACACCACGTGCTAAGGACGTTGACTGCTCGGCAGCTCTATACGACCCGTC…
Taylor & Rogers 2015, Molecular Phylogenetics & Evolution	KP324622.1	NA	Animalia	Cnidaria	Anthozoa	Scleralcyonacea	Primnoidae	Narella	Narella sp.	yes	1	32	no	NA	NA	GAGAGTTAAAAAGTGCGTGAAACCGCTGGAATGGAAGCGAATGGAGTTCGCAACACGCCTTGTCGCGCTCTGCTTCGATCTTTTCAGACGAGCCTTGTGCGGTCGCGTGACGTGGGCGGTGCACTTCCGGCCGGCAAAAGTCAACGTCGGTTTGCCGCGAGTTAAAAAGCTGCGAGCACGGTAGGTCCTTCCGGATCGGTAAGGCTTGTATGCACATGACTCGCTGCAGACCGAGTTCTGCCGCAGCGCGTACCTGCAGGCTGCTGTCTTCATCGTTGAATCGGTATCACGTCACTCGACGGACGGCTTCGCCTGTGCGTCGGCGTGCGGCCGTTCAAACGATGAGCCTAACAGACACGACGCGCTGAGGACGTTGACCGCCCGGCGACTCCATCCGAC…
Taylor & Rogers 2015, Molecular Phylogenetics & Evolution	KP324623.1	NA	Animalia	Cnidaria	Anthozoa	Scleralcyonacea	Primnoidae	Narella	Narella sp.	yes	0	NA	no	NA	NA	GAGAGTTAAAAAGTGCGTGAAACCGCTGGAAGGGAAGCGAATGGAGTTCGCAACTCGTTGTCGTGCTCTGCCTCGATCTTTCTAGACGAGCCTTGTGCGGTCGCGCGACGTGGGCGGTGCACTTCCGGACGGCGAAWGTCAACGTCGGTTTGYCGCGAGTTAAAAAGCTGCGAGCACGGTAGGTCCGTCCGGATCGGTAAGGCTTGTATGCACATGACTCGCTGCAGACCGAGTTCTGCCGCAGCGCGTACCTCAGGCTGCTGCCTTTATCGTTGAATCGGTGTAATGTCACTGGACGGACGGCTTTGCCTGTGCGTCGGCGTGCGGCCGTTCAAACGATGAGGCAAACAGACACGACGCGCTGAGGACGTTGACCGCCCGGCGACTCCATCCGACCCG…
Taylor & Rogers 2015, Molecular Phylogenetics & Evolution	KP324624.1	NA	Animalia	Cnidaria	Anthozoa	Scleralcyonacea	Primnoidae	Narella	Narella sp.	yes	1	25	no	NA	NA	AAAAAGTGCGTGAAACCGCTGGAATGGAAGCGAATGGAGTTCGCAACACGCCTTGTCGCGCTCTGCCTCGATCTTTTCAGACGAGCCTTGTGCGGTCGCGTGACGAGGGCGGTGCACTTCCGGCCGGYGAAAGTCAACGTCGGTTTGCCGCGAGTTAAAAAGCTGCGAGCACGGTARGTCCAATAGGATCGGTAATTNAGGCTTGCATGCACATGACTCGCTGCAGACCGAGTTCTGCCGCAGCGCGTGCCTCAGGCTGCTGTCTTTATCGTTGAATCGGTATCACGTCACCGGACGGACGGCTTTGCCTGTGCGTCGGCGTGCGGCCGTTCAAACGGTGAGGATAACGGACACGACGCGCTGAGGACGTTGACCGCGCCGCGACTCCATCCGACCCGT…
Taylor & Rogers 2015, Molecular Phylogenetics & Evolution	KP324625.1	NA	Animalia	Cnidaria	Anthozoa	Scleralcyonacea	Primnoidae	Thouarella	Thouarella coronata	yes	0	NA	no	NA	NA	GAGAGTTAAAAAGTGCGTGAAACCGCTGGAAGGGAAGCGAATAGAGTTAGCAATTCGCCTYAGCGTGCTCGGCTTCGATCTTTCTAGACGAGCCCCGTACGCTCGCGTTGCTTGGGCGGTGCACTTCCGGTTGGCGAACGTCAACGTCGGTTTGCGCGGAGTCAAAAAGCTGCAAGCACGGTAGGTCTCTCATGATCGGTAAGGCTTGCGTGCAAATAGCTTCGCGTAGACCGAGTTATGTCGCAGCACGTACCTGCTGGCTGATGTCCTTATCGTTGAGTCGGTCTAATGTCGCTGGACGTACGGCTTTGCCTGTGCGTCNCTGTGCGGCCGTTCAAACGATGCGGCAAACAGACACGACGAGCTGAGGACGTTGACCGCTTGGCGGCTCTATCCGAC…
Taylor & Rogers 2015, Molecular Phylogenetics & Evolution	KP324627.1	NA	Animalia	Cnidaria	Anthozoa	Scleralcyonacea	Primnoidae	Primnoella	Primnoella chilensis	no	NA	NA	no	NA	NA	GAGAGTTAAAAAGTGCGTGAAACCGTTGGGGAGCGAATAGAGTTTGCAATTCGCCTTGTGTGCATGCCCTCGATCTTTCTAGACGAGCCTTGCACGACTGCGTTGCGTGACCGGTGCACTTCCGCTTGGCGAAAGTCAACGTCGGTTTGCGCGGAGTTAGAAAGCTGCAAGCACGGTAGATCTTTCGGGATCGGTAAGGTTTGCGTGCAAATAGCTTCGTGCGGACCGAGTTCTGTCGCAGCACGTACCTGCAGGTTGATGTCTTCGTCTTTGACACGGTTTAACGTCGCTCGACGGACGGCTTTGCCTGTGCGTTGGCGTGCGGCCGCTCAAACGATGGAGGAAACAGACACGACGTGCTAAGGACGTTGACTGCTCGGCGGCTCTATCCGACCCGTC…
Taylor & Rogers 2015, Molecular Phylogenetics & Evolution	KP324628.1	NA	Animalia	Cnidaria	Anthozoa	Scleralcyonacea	Primnoidae	Parastenella	Parastenella spinosa	yes	1	25	no	NA	NA	GAGAGTTAAAAAGTGCGTGAAACCACTGGAAGGGAAGCGAATGGAGTTCGCAATTCGCCTTGTCGTGCTGCGCCTCGATCTTTCTAGACGAGCGTTGTGCGGTCGCGTTACGTGCGCGGTGCACTTCCRGACGGCGAAAGTCAACGTCTGTTTGCCGCGAGTTAAAAAGCTGCCAGCATGRTAGGTCCATCCGTCGCTGTAAGGCGCGCAAGCATATGACTCCCTGCATAGWCTGACTATGTCRCAGCGCGCTTCTAAGGCTGCTGTCTTTATCGTTGAATCGGCACCATGTCACTGGACGGACGGCTTTGCCTGTGCGTCGGGGTGCNGCCGTTCAAACGACGAGGCAAACAGACACGACGCGNTGAGGACGTTGACCGCCCGGCGACTCCATCCGAC…
Taylor & Rogers 2015, Molecular Phylogenetics & Evolution	KP324629.1	NA	Animalia	Cnidaria	Anthozoa	Scleralcyonacea	Primnoidae	Heptaprimnoa	Heptaprimnoa patagonica	yes	0	NA	no	NA	NA	GAGAGTTAAAAAGTGCGTGAAACCGTTGAAAGGGAAGCGAATGGAGTCGGCAAGTCGTCGGCGCGTTTGCGTTCGATCTTTCTAGACGAAGCTTGCGCACGTGCGTCGCGCAACCGGTGCACTTCCGCTTGGCGAAAGTCAACGTCGGTTTGCGCGGAGTCAAAAAGCCGCGAGCACGGTAGGTCGCTCGCGATCGGTAAGGCTTGCGAGCGAACGGCTTCACGTAGACCGAGTTAAGTCGCAGCACGTACCTGCGGGTTGATGTCTTCGTGGCKGAGTAGGTTTAACCTCGTCGGGCGGACGGCTTTGCCTGTGCGTCCGCGAGCGGCCTGTCAAACCACGGAGGAAGCAGACACGACGTGCTGAGCACGTTGCCTGCCCACCGGCTCCATCCGACCC…
Taylor & Rogers 2015, Molecular Phylogenetics & Evolution	KP324630.1	NA	Animalia	Cnidaria	Anthozoa	Scleralcyonacea	Primnoidae	Thouarella	Thouarella crenelata	yes	0	NA	no	NA	NA	GAGAGTTAAAAAGTGCGTGAAACCGTTGGAAGGGAAGCGAATAGAGATAGAAATTCTCCTGGCCGTGCTCGGTTTCGATCTTTATAGACGAGCCTTGTACGCTTGCGTTGCGTGACCGGTGCACTTCCGCTTGGCGAATGTCAACGTCGGTTTGCGTGGCGTGAAAAAGCCGCATGCACGGTAGGTCCCTCGGGATCGGTAAGGCTTGCGTGCAATCGACTCCACGTAGACCGAGTTATGTCGCAGCACGTACCTGAAGGTTGATGTCCTCATCGTTATGTCGGTTTACCGTCGCTTGGCGGACGGCTTTGCCTGTGCGTTTAAGTGCGGCCGTTTAAACGATGCGCAATACATACACGACGTGCTGAGGACGTTGACGATTCTGCGCCTCTATCCGAC…
Taylor & Rogers 2015, Molecular Phylogenetics & Evolution	KP324631.1	NA	Animalia	Cnidaria	Anthozoa	Scleralcyonacea	Primnoidae	Thouarella	Thouarella undulata	yes	1	29	no	NA	NA	GAGAGTTAANAAGTACGTGAAACCGTTGTAAGGGAAGCGAATAGAGATAAAAATTCCTCGGCGTGCTTGGTTTCGATCTTTACAGACGAGCCTTGTACGCTTGCGTTGCGTGATCGGTGCACTTCCGCTTGGCGAATGTCAACGTCGGTTTGCGTGGGGTGAAAAAGCCGCATGCACGGTAGATCTCACGATGTCGGTAAGGCTTGCGTGCAAATGACTTCACGTACACCGAGTTCTGTCGCAGCACGTACCTAAGGTTGATGTCTTCATCGTTATGTCGGTTTACCGTCGCTTGACGGACGGCTTTGCCTGTGCGTTTAATTGCGGCCGTTTAGACGATGGGGAATACATACACGACGTGCTGAGGACGTTGACGATTCTGCGCCTCTATCCGAGCCG…
Taylor & Rogers 2015, Molecular Phylogenetics & Evolution	KP324632.1	NA	Animalia	Cnidaria	Anthozoa	Scleralcyonacea	Primnoidae	Thouarella	Thouarella diadema	yes	0	NA	no	NA	NA	GAGAGTTAAAAAGTACGTGAAACCGTTGGAAGGGAAGCGAATAGAGATAGAAATTCCCCTCGGCGTGCTCGATCTTTATAGACGAGCCTTGTACGCTTGCGTTGCGTGATCAGTGCACTTCCGCGTGGCGAATGTCAACGTCGGTTTGCGTGGTGCCAAAAAGCCGCATGCACGGTAGGTCTCACGGGATCGGTAAGGCTTGCGTGCAAACGACTCCATGTAGACCGAGTTCTGTCGCAGCACGTACCTGAACGTTGATGCCCTCATCGTTATGTCGGTTTACCGTCGCTTGGCGGACGGCTTTGCCTGTGCGTTCAAGTACGGCCGTTTAGACGATGGGGAATACATACACGACGTGCTGAGGACGTTGACGATTCTGCGCCTCTATCCGACCCGTCT…
Soler-Hurtado et al. 2017, Molecular Phylogenetics & Evolution	KX721230.1	NA	Animalia	Cnidaria	Anthozoa	Malacalcyonacea	Gorgoniidae	Eugorgia	Eugorgia nobilis	yes	0	NA	no	NA	NA	GAGAGTTAAAAAGTACGTGAAACCGTTGAAAGGGAAGCGAATGGAGTTAGCAATTCGCCCTGCTAGATTCAGTTGTTCGTGCTTCGCGACGTGCGCGCTCTCGATCCGCATGGACGAGACGTGTACGGATGCGATGTGCGGGCGGCGCATTTCTGGCGAGCGAGCGTCAGCGTCGGTTGTCGATGGGCGACAAGGACTTGAGGAAGGTGAACTGGTCCTTGTGGCCGGTTGTTATAGCCTCTTGTTCGTATAGCCCGACGGCGACCGTGGCTCTGCGACGCGTGCCTGGCTGGTGACTCTTGCGATCGGTCCGGCATGTCGACCGTGGCGGACGGCACGCCTGTGCGCTCAAACTGCTGCTGGTCGATCGTGGGTTGTTCACACACTACGCGTCTAGGA…
Soler-Hurtado et al. 2017, Molecular Phylogenetics & Evolution	KX721231.1	NA	Animalia	Cnidaria	Anthozoa	Malacalcyonacea	Gorgoniidae	Leptogorgia	Leptogorgia mariarosae	yes	0	NA	no	NA	NA	GAGAGTTAAAAAGTACGTGAAACCGTTGAAAGGGAAGCGAATGGAGTTAGCAATTCGCCCTGCTAGATTCAGTTGTTCGTGCTTCGCGACGCGCACGCCCTCGATCCGCATGGACGAGGCGTGCRCGGACGCGATGTGCGGGCGGCGCACTTCTGGCGAGCGAGCGTCAGCGTCGGTTGTCGATGGGCGACAAGGACATGAGGAAGGTGAACTGGTCCTCGTGACCGGTTGTTATAGCCTCTTGTTCGTATAGCCCGAYGGCGACCGTGGCTCTGCGACGCGTGCCTGGCTGGTGATTCTTACGATCGGTCCGGCATGTCGACCGTGGCGGACGGCACGCCTGTGCGCTCAAACTGCTGCCGGTCGATCGTGGGTTTTTCACACACTACGCGTCTAGGA…
Soler-Hurtado et al. 2017, Molecular Phylogenetics & Evolution	KX721232.1	NA	Animalia	Cnidaria	Anthozoa	Malacalcyonacea	Gorgoniidae	Pacifigorgia	Pacifigorgia stenobrochis	yes	1	29	no	NA	NA	GAGAGTTAAAAAGTACGTGAAACCGTTGNAAGGGAAGCGAATGGAGTTAGCAATTCGCCCTGCTAGATTCAGTTGTTCGTGCTTCGCGGCGTGCGCGCTCTCGATCCGCATGGACGAGACGTGTACGGATGCGATGTGCGGGCGGCGCATTTCTGGCGAGCGAGCGTCAGCGTCGGTTGTCGATGGGCGACAAGGACATGAGGAAGGTGAACTGGCCTTACGGCCGGTTGTTATAGCCTCTTGTTCGTATAGCCCGACGGCGACCGTGGCTCTGCGACGCGTGCCTGGCTGGTGACTCGTACGATCGGTCCGGCATGTCGACCGTGGCGGACGGCACGCCTGTGCGCTCAAACTGCTGCCGGTCGATCGCATGATGTTCACACACTACGCGTCTAGGAT…
Soler-Hurtado et al. 2017, Molecular Phylogenetics & Evolution	KX721233.1	NA	Animalia	Cnidaria	Anthozoa	Malacalcyonacea	Gorgoniidae	Leptogorgia	Leptogorgia alba	yes	0	NA	no	NA	NA	GAGAGTTAAAAAGTACGTGAAACCGTTGAAAGGGAAGCGAATGGAGTTAGCAATTCGCCCTGCTAGATTCAGTTGTTCGTGCTTCGCGACGTGCGCGCTCTCGATCCGCATGGACGAGACGTGTACGGATGCGAAGTTCGTGCAGCGCACTTCTGGCGAGCGAGCGTCAGCGTCGGTTGTCGATGGGTGACAAGGACATGAGGAAGGTGAACTGGTCCTTGTGGCCGGTTGTTATAGCCTCTTGTTCGTATAGCCCGACGGCGACCGTGGCTCTGCGACGCGTGCCTGGCTGGTGATTCTCATGATCGGTCCGGCATGTCGACCGTGGCGGACGGCACGCCTGTGCGCTCAAACTGCTGCCGGTCGATCGTGAGTTTTTCACACACTACGCGTCTAGGA…
Soler-Hurtado et al. 2017, Molecular Phylogenetics & Evolution	KX721234.1	NA	Animalia	Cnidaria	Anthozoa	Malacalcyonacea	Gorgoniidae	Leptogorgia	Leptogorgia manabiensis	yes	0	NA	no	NA	NA	GAGAGTTAAAAAGTACGTGAAACCGTTGAAAGGGAAGCGAATGGAGTTAGCAATTCGCCCTGCTAGATTCAGTTGTTCGTGCTTCGCGACGTGCGCGCTCTCGATCCGCATGGACGAGACGTGTACGGATGCGAAGTTCGTGCAGCGCACTTCTGGCGAGCGAGCGTCAGCGTCGGTTGTCGATGGGTGACAAGGACATGAGGAAGGTGAACTGGTCCTTGTGGCCGGTTGTTATAGCCTCTTGTTCGTATAGCCCGACGGCGACCGTGGCTCTGCGACGCGTGCCTGGCTGGTGATTCTCATGATCGGTCCGGCATGTCGACCGTGGCGGACGGCACGCCTGTGCGCTCAAACTGCTGCCGGTCGATCGTGAGTTTTTCACACACTACGCGTCTAGGA…
Soler-Hurtado et al. 2017, Molecular Phylogenetics & Evolution	KX721235.1	NA	Animalia	Cnidaria	Anthozoa	Malacalcyonacea	Gorgoniidae	Leptogorgia	Leptogorgia manabiensis	yes	0	NA	no	NA	NA	GAGAGTTAAAAAGTACGTGAAACCGTTGAAAGGGAAGCGAATGGAGTTAGCAATTCGCCCTGCTAGATTCAGTTGTTCGTGCTTCGCGACGTGCGCGCTCTCGATCCGCATGGACGAGACGTGTACGGATGCGAAGTTCGTGCAGCGCACTTCTGGCGAGCGAGCGTCAGCGTCGGTTGTCGATGGGTGACAAGGACATGAGGAAGGTGAACTGGTCCTTGTGGCCGGTTGTTATAGCCTCTTGTTCGTATAGCCCGACGGCGACCGTGGCTCTGCGACGCGTGCCTGGCTGGTGATTCTCATGATCGGTCCGGCATGTCGACCGTGGCGGACGGCACGCCTGTGCGCTCAAACTGCTGCCGGTCGATCGTGAGTTTTTCACACACTACGCGTCTAGGA…
Soler-Hurtado et al. 2017, Molecular Phylogenetics & Evolution	KX721236.1	NA	Animalia	Cnidaria	Anthozoa	Malacalcyonacea	Gorgoniidae	Leptogorgia	Leptogorgia manabiensis	yes	0	NA	no	NA	NA	GAGAGTTAAAAAGTACGTGAAACCGTTGAAAGGGAAGCGAATGGAGTTAGCAATTCGCCCTGCTAGATTCAGTTGTTCGTGCTTCGCGACGTGCGCGCTCTCGATCCGCATGGACGAGACGTGTACGGATGCGAAGTTCGTGCAGCGCACTTCTGGCGAGCGAGCGTCAGCGTCGGTTGTCGATGGGTGACAAGGACATGAGGAAGGTGAACTGGTCCTTGTGGCCGGTTGTTATAGCCTCTTGTTCGTATAGCCCGACGGCGACCGTGGCTCTGCGACGCGTGCCTGGCTGGTGATTCTCATGATCGGTCCGGCATGTCGACCGTGGCGGACGGCACGCCTGTGCGCTCAAACTGCTGCCGGTCGATCGTGAGTTTTTCACACACTACGCGTCTAGGA…
Soler-Hurtado et al. 2017, Molecular Phylogenetics & Evolution	KX721237.1	NA	Animalia	Cnidaria	Anthozoa	Malacalcyonacea	Gorgoniidae	Leptogorgia	Leptogorgia manabiensis	yes	0	NA	no	NA	NA	GAGAGTTAAAAAGTACGTGAAACCGTTGAAAGGGAAGCGAATGGAGTTAGCAATTCGCCCTGCTAGATTCAGTTGTTCGTGCTTCGCGACGTGCGCGCTCTCGATCCGCATGGACGAGACGTGTACGGATGCGAAGTTCGTGCAGCGCACTTCTGGCGAGCGAGCGTCAGCGTCGGTTGTCGATGGGTGACAAGGACATGAGGAAGGTGAACTGGTCCTTGTGGCCGGTTGTTATAGCCTCTTGTTCGTATAGCCCGACGGCGACCGTGGCTCTGCGACGCGTGCCTGGCTGGTGATTCTCATGATCGGTCCGGCATGTCGACCGTGGCGGACGGCACGCCTGTGCGCTCAAACTGCTGCCGGTCGATCGTGAGTTTTTCACACACTACGCGTCTAGGA…
Soler-Hurtado et al. 2017, Molecular Phylogenetics & Evolution	KX721238.1	NA	Animalia	Cnidaria	Anthozoa	Malacalcyonacea	Gorgoniidae	Leptogorgia	Leptogorgia manabiensis	yes	0	NA	no	NA	NA	GAGAGTTAAAAAGTACGTGAAACCGTTGAAAGGGAAGCGAATGGAGTTAGCAATTCGCCCTGCTAGATTCAGTTGTTCGTGCTTCGCGACGTGCGCGCTCTCGATCCGCATGGACGAGACGTGTACGGATGCGAAGTTCGTGCAGCGCACTTCTGGCGAGCGAGCGTCAGCGTCGGTTGTCGATGGGTGACAAGGACATGAGGAAGGTGAACTGGTCCTTGTGGCCGGTTGTTATAGCCTCTTGTTCGTATAGCCCGACGGCGACCGTGGCTCTGCGACGCGTGCCTGGCTGGTGATTCTCATGATCGGTCCGGCATGTCGACCGTGGCGGACGGCACGCCTGTGCGCTCAAACTGCTGCCGGTCGATCGTGAGTTTTTCACACACTACGCGTCTAGGA…
Soler-Hurtado et al. 2017, Molecular Phylogenetics & Evolution	KX721239.1	NA	Animalia	Cnidaria	Anthozoa	Malacalcyonacea	Gorgoniidae	Leptogorgia	Leptogorgia alba	yes	0	NA	no	NA	NA	GAGAGTTAAAAAGTACGTGAAACCGTTGAAAGGGAAGCGAATGGAGTTAGCAATTCGCCCTGCTAGATTCAGTTGTTCGTGCTTCGCGACGTGCGCGCTCTCGATCCGCATGGACGAGACGTGTACGGATGCGAAGTTCGTGCAGCGCACTTCTGGCGAGCGAGCGTCAGCGTCGGTTGTCGATGGGTGACAAGGACATGAGGAAGGTGAACTGGTCCTTGTGGCCGGTTGTTATAGCCTCTTGTTCGTATAGCCCGACGGCGACCGTGGCTCTGCGACGCGTGCCTGGCTGGTGATTCTCATGATCGGTCCGGCATGTCGACCGTGGCGGACGGCACGCCTGTGCGCTCAAACTGCTGCCGGTCGATCGTGAGTTTTTCACACACTACGCGTCTAGGA…
Soler-Hurtado et al. 2017, Molecular Phylogenetics & Evolution	KX721240.1	NA	Animalia	Cnidaria	Anthozoa	Malacalcyonacea	Gorgoniidae	Leptogorgia	Leptogorgia alba	yes	0	NA	no	NA	NA	GAGAGTTAAAAAGTACGTGAAACCGTTGAAAGGGAAGCGAATGGAGTTAGCAATTCGCCCTGCTAGATTCAGTTGTTCGTGCTTCGCGACGTGCGCGCTCTCGATCCGCATGGACGAGACGTGTACGGATGCGAAGTTCGTGCAGCGCACTTCTGGCGAGCGAGCGTCAGCGTCGGTTGTCGATGGGTGACAAGGACATGAGGAAGGTGAACTGGTCCTTGTGGCCGGTTGTTATAGCCTCTTGTTCGTATAGCCCGACGGCGACCGTGGCTCTGCGACGCGTGCCTGGCTGGTGATTCTCATGATCGGTCCGGCATGTCGACCGTGGCGGACGGCACGCCTGTGCGCTCAAACTGCTGCCGGTCGATCGTGAGTTTTTCACACACTACGCGTCTAGGA…
Soler-Hurtado et al. 2017, Molecular Phylogenetics & Evolution	KX721241.1	NA	Animalia	Cnidaria	Anthozoa	Malacalcyonacea	Gorgoniidae	Leptogorgia	Leptogorgia alba	yes	0	NA	no	NA	NA	GAGAGTTAAAAAGTACGTGAAACCGTTGAAAGGGAAGCGAATGGAGTTAGCAATTCGCCCTGCTAGATTCAGTTGTTCGTGCTTCGCGACGTGCGCGCTCTCGATCCGCATGGACGAGACGTGTACGGATGCGAAGTTCGTGCAGCGCACTTCTGGCGAGCGAGCGTCAGCGTCGGTTGTCGATGGGTGACAAGGACATGAGGAAGGTGAACTGGTCCTTGTGGCCGGTTGTTATAGCCTCTTGTTCGTATAGCCCGACGGCGACCGTGGCTCTGCGACGCGTGCCTGGCTGGTGATTCTCATGATCGGTCCGGCATGTCGACCGTGGCGGACGGCACGCCTGTGCGCTCAAACTGCTGCCGGTCGATCGTGAGTTTTTCACACACTACGCGTCTAGGA…
Soler-Hurtado et al. 2017, Molecular Phylogenetics & Evolution	KX721242.1	NA	Animalia	Cnidaria	Anthozoa	Malacalcyonacea	Gorgoniidae	Leptogorgia	Leptogorgia manabiensis	yes	0	NA	no	NA	NA	GAGAGTTAAAAAGTACGTGAAACCGTTGAAAGGGAAGCGAATGGAGTTAGCAATTCGCCCTGCTAGATTCAGTTGTTCGTGCTTCGCGACGTGCGCGCTCTCGATCCGCATGGACGAGACGTGTACGGATGCGAAGTTCGTGCAGCGCACTTCTGGCGAGCGAGCGTCAGCGTCGGTTGTCGATGGGTGACAAGGACATGAGGAAGGTGAACTGGTCCTTGTGGCCGGTTGTTATAGCCTCTTGTTCGTATAGCCCGACGGCGACCGTGGCTCTGCGACGCGTGCCTGGCTGGTGATTCTCATGATCGGTCCGGCATGTCGACCGTGGCGGACGGCACGCCTGTGCGCTCAAACTGCTGCCGGTCGATCGTGAGTTTTTCACACACTACGCGTCTAGGA…
Soler-Hurtado et al. 2017, Molecular Phylogenetics & Evolution	KX721243.1	NA	Animalia	Cnidaria	Anthozoa	Malacalcyonacea	Gorgoniidae	Leptogorgia	Leptogorgia alba	yes	0	NA	no	NA	NA	GAGAGTTAAAAAGTACGTGAAACCGTTGAAAGGGAAGCGAATGGAGTTAGCAATTCGCCCTGCTAGATTCAGTTGTTCGTGCTTCGCGACGTGCGCGCTCTCGATCCGCATGGACGAGACGTGTACGGATGCGAAGTTCGTGCAGCGCACTTCTGGCGAGCGAGCGTCAGCGTCGGTTGTCGATGGGTGACAAGGACATGAGGAAGGTGAACTGGTCCTTGTGGCCGGTTGTTATAGCCTCTTGTTCGTATAGCCCGACGGCGACCGTGGCTCTGCGACGCGTGCCTGGCTGGTGATTCTCATGATCGGTCCGGCATGTCGACCGTGGCGGACGGCACGCCTGTGCGCTCAAACTGCTGCCGGTCGATCGTGAGTTTTTCACACACTACGCGTCTAGGA…
Soler-Hurtado et al. 2017, Molecular Phylogenetics & Evolution	KX721244.1	NA	Animalia	Cnidaria	Anthozoa	Malacalcyonacea	Gorgoniidae	Leptogorgia	Leptogorgia alba	yes	0	NA	no	NA	NA	TTAAAAAGTACGTGAAACCGTTGAAAGGGAAGCGAATGGAGTTAGCAATTCGCCCTGCTAGATTCAGTTGTTCGTGCTTCGCGACGTGCGCGCTCTCGATCCGCATGGACGAGACGTGTACGGATGCGACGTTCGTGCAGCGCACTTCTGGCGAGCGAGCGTCAGCGTCGGTTGTCGATGGGTGAAAAGGGCATGAGGAAGGTGAACTGGTCCTTGTGGCCGGTTGTTATAGCCTCTTGTTCGTATAACCCGACGGCGACCGTGGCTCTGCGACGCGTGCCTGGCTGGTGACTCTCATGATCGGTCCGGCATGTCGACCGTGGCGGACGGCACGCCTGTGCGCTCAAACTGCTGCCGGTCGATCGTGAGTTTTTCACACACTACGCGTCTAGGATGCTG…
Soler-Hurtado et al. 2017, Molecular Phylogenetics & Evolution	KX721245.1	NA	Animalia	Cnidaria	Anthozoa	Malacalcyonacea	Gorgoniidae	Eugorgia	Eugorgia daniana	yes	0	NA	no	NA	NA	GAGAGTTAAAAAGTACGTGAAACCGTTGAAAGGGAAGCGAATGGAGTTAGCAATTCGCCCTGCTAGATTCAGTTGTTCGTGCTTCGCGACGTGCACGCTCTCGATCCGCATGGACGAGGCGTGTACGGATGCGATGTGCGGGCGGCGCATTTCTGGCGAGCGAGCGTCAGCGTCGGTTGTTGATGGGTGATAAGGACATGAGGAAGGTGAACTGGCCCTTGTGGCCGGTTGTTATAGCCTCTTGTTCGCATAACCCAATGGCGACCGTGGCTCTGCGACGCGTGCCTGGCTGGTGACTCTTACGATCGGTCCGGCATGTCGACCGTGGCGGACGGCACGCCTGTGCGCTCAAACTGCTGCCGGTCGATCGTAGGGTGTTCACACACTACGCGTCTAGGA…
Soler-Hurtado et al. 2017, Molecular Phylogenetics & Evolution	KX721246.1	NA	Animalia	Cnidaria	Anthozoa	Malacalcyonacea	Gorgoniidae	Eugorgia	Eugorgia daniana	yes	0	NA	no	NA	NA	GAGAGTTAAAAAGTACGTGAAACCGTTGAAAGGGAAGCGAATGGAGTTAGCAATTCGCCCTGCTAGATTCAGTTGTTCGTGCTTCGCGACGTGCACGCTCTCGATCCGCATGGACGAGGCGTGTACGGATGCGATGTGCGGGCGGCGCATTTCTGGCGAGCGAGCGTCAGCGTCGGTTGTTGATGGGTGATAAGGACATGAGGAAGGTGAACTGGCCCTTGTGGCCGGTTGTTATAGCCTCTTGTTCGCATAACCCAATGGCGACCGTGGCTCTGCGACGCGTGCCTGGCTGGTGACTCTTACGATCGGTCCGGCATGTCGACCGTGGCGGACGGCACGCCTGTGCGCTCAAACTGCTGCCGGTCGATCGTAGGGTGTTCACACACTACGCGTCTAGGA…
Soler-Hurtado et al. 2017, Molecular Phylogenetics & Evolution	KX721247.1	NA	Animalia	Cnidaria	Anthozoa	Malacalcyonacea	Gorgoniidae	Leptogorgia	Leptogorgia diffusa	yes	0	NA	no	NA	NA	GAGAGTTAAAAAGTACGTGAAACCGTTGAAAGGGAAGCGAATGGAGTTAGCAATTCGCCCTGCTAGATTCAGTTGTTCGTGCTTCGCGACGTGCACGCTCTCGATCCGCATGGACGAGGCGTGCACGGATGCGATGTGCGGGCGGCGCACTTCTGGCGAGCGAGCGTCAGCGTCGGTTGTCGATGGGCGACAAGGACATGAGGAAGGTGAACTGGTCCTTGTGACCGGTTGTTATAGCCTCTTGTTCGCATAGCCCGACGGCGACCGTGGCTCTGCGACGCGTGCTTGGCTGGTGATTCTTACGATCGGTCCGGCATGTCGACCGTGGCGGACGGCACGCCTGTGCGCTCAAACTGCTGCCGGTCGATCGTGGGTTTTTCACACACTACGCGTCTAGGA…
Soler-Hurtado et al. 2017, Molecular Phylogenetics & Evolution	KX721248.1	NA	Animalia	Cnidaria	Anthozoa	Malacalcyonacea	Gorgoniidae	Leptogorgia	Leptogorgia obscura	yes	0	NA	no	NA	NA	GAGAGTTAAAAAGTACGTGAAACCGTTGAAAGGGAAGCGAATGGAGTTAGCAATTCGCCCTGCTAGATTCAGTTGTTCGTGCTTCGCGACGTGCACGCTCTCGATCCGCATGGACGAGGCGTGCACGGATGCGATGTGCGGGCGGCGCACTTCTGGCGAGCGAGCGTCAGCGTCGGTTGTCGATGGGCGACAAGGACATGAGGAAGGTGAACTGGTCCTTGTGACCGGTTGTTATAGCCTCTTGTTCGCATAGCCCGACGGCGACCGTGGCTCTGCGACGCGTGCTTGGCTGGTGATTCTTACGATCGGTCCGGCATGTCGACCGTGGCGGACGGCACGCCTGTGCGCTCAAACTGCTGCCGGTCGATCGTGGGTTTTTCACACACTACGCGTCTAGGA…
Soler-Hurtado et al. 2017, Molecular Phylogenetics & Evolution	KX767430.1	NA	Animalia	Cnidaria	Anthozoa	Malacalcyonacea	Gorgoniidae	Eugorgia	Eugorgia nobilis	yes	0	NA	no	NA	NA	GAGAGTTAAAAAGTACGTGAAACCGTTGAAAGGGAAGCGAATGGAGTTAGCAATTCGCCCTGCTAGATTCAGTTGTTCGTGCTTCGCGACGTGCGCGCTCTCGATCCGCATGGACGAGACGTGTACGGATGCGATGTGCGGGCGGCGCATTTCTGGCGAGCGAGCGTCAGCGTCGGTTGTCGATGGGCGACAAGGACTTGAGGAAGGTGAACTGGTCCTTGTGGCCGGTTGTTATAGCCTCTTGTTCGTATAGCCCGACGGCGACCGTGGCTCTGCGACGCGTGCCTGGCTGGTGACTCTTGCGATCGGTCCGGCATGTCGACCGTGGCGGACGGCACGCCTGTGCGCTCAAACTGCTGCCGGTCGATCGTAGGGTGTTCACACACTACGCGTCTAGGA…
Soler-Hurtado et al. 2017, Molecular Phylogenetics & Evolution	KX767431.1	NA	Animalia	Cnidaria	Anthozoa	Malacalcyonacea	Gorgoniidae	Leptogorgia	Leptogorgia diffusa	yes	0	NA	no	NA	NA	GAGAGTTAAAAAGTACGTGAAACCGTTGAAAGGGAAGCGAATGGAGTTAGCAATTCGCCCTGCTAGATTCAGTTGTTCGTGCTTCGCGACGTGCACGCTCTCGATCCGCATGGACGAGGCGTGCACGGATGCGATGTGCGGGCGGCGCACTTCTGGCGAGCGAGCGTCAGCGTCGGTTGTCGATGGGCGACAAGGACATGAGGAAGGTGAACTGGTCCTTGTGACCGGTTGTTATAGCCTCTTGTTCGCATAGCCCGACGGCGACCGTGGCTCTGCGACGCGTGCTTGGCTGGTGATTCTTACGATCGGTCCGGCATGTCGACCGTGGCGGACGGCACGCCTGTGCGCTCAAACTGCTGCCGGTCGATCGTGGGTTTTTCACACACTACGCGTCTAGGA…
Soler-Hurtado et al. 2017, Molecular Phylogenetics & Evolution	KX767432.1	NA	Animalia	Cnidaria	Anthozoa	Malacalcyonacea	Gorgoniidae	Leptogorgia	Leptogorgia cofrini	yes	0	NA	no	NA	NA	GAGAGTTAAAAAGTACGTGAAACCGTTGAAAGGGAAGCGAATGGAGTTAGCAATTCGCCCTGCTAGATTCAGTTGTTCGTGCTTCGCGACGTGCGCGCTCTCGATCCGCATGGACGAGACGTGTACGGATGCGAAGTTCGTGCAGCGCACTTCTGGCGAGCGAGCGTCAGCGTCGGTTGTCGATGGGTGACAAGGACATGAGGAAGGTGAACTGGTCCTTGTGGCCGGTTGTTATAGCCTCTTGTTCGTATAGCCCGACGGCGACCGTGGCTCTGCGACGCGTGCCTGGCTGGTGATTCTCATGATCGGTCCGGCATGTCGACCGTGGCGGACGGCACGCCTGTGCGCTCAAACTGCTGCCGGTCGATCGTGAGTTTTTCACACACTACGCGTCTAGGA…
Soler-Hurtado et al. 2017, Molecular Phylogenetics & Evolution	KX767433.1	NA	Animalia	Cnidaria	Anthozoa	Malacalcyonacea	Gorgoniidae	Leptogorgia	Leptogorgia cuspidata	yes	0	NA	no	NA	NA	GAGAGTTAAAAAGTACGTGAAACCGTTGAAAGGGAAGCGAATGGAGTTAGCAATTCGCCCTTGCTAGATTCAGTTGTTCGTGCTTCGCGACGTGCGCGCTCTCGATCCGCATGGACGAGACGTGTACGGATGCGACGTGCGGGCGGCGCACTTCTGGCGAGCGAGCGTCAGCGTCGGTTGTCGATGGGTGACAAGGACATGAGGAAGGTGAACTGGTCCTCGTGGCCGGTTGTTATAGCCTCTTGTTCGTATAGCCCGACGGCGACCGTGGCTCTGCGACGCGTGCCTGGCTGGTGATTCTCATGATCGGTCCGGCATGTCGACCGTGGCGGACGGCACGCCTGTGCGCTCAAACTGCTGCCGGTCGATCGTGGGTTTTTCACACACTACGCGTCTAGG…
Soler-Hurtado et al. 2017, Molecular Phylogenetics & Evolution	KX767434.1	NA	Animalia	Cnidaria	Anthozoa	Malacalcyonacea	Gorgoniidae	Leptogorgia	Leptogorgia alba	yes	0	NA	no	NA	NA	GAGAGTTAAAAAGTACGTGAAACCGTTGAAAGGGAAGCGAATGGAGTTAGCAATTCGCCCTGCTAGATTCAGTTGTTCGTGCTTCGCGACGTGCGCGCTCTCGATCCGCATGGACGAGACGTGTACGGATGCGAYGTKCGKGCRGCGCACTTCTGGCGAGCGAGCGTCAGCGTCGGTTGTCGATGGGYGACAAGGACATGAGGAAGGTGAACTGGTCCTYGTGGCCGGTTGTTATAGCCTCTTGTTCGTATAGCCCGACGGCGACCGTGGCTCTGCGACGCGTGCCTGGCTGGTGATTCTCATGATCGGTCCGGCATGTCGACCGTGGCGGACGGCACGCCTGTGCGCTCAAACTGCTGCCGGTCGATCGTGRGTTTTTCACACACTACGCGTCTAGGA…
Soler-Hurtado et al. 2017, Molecular Phylogenetics & Evolution	KX767435.1	NA	Animalia	Cnidaria	Anthozoa	Malacalcyonacea	Gorgoniidae	Leptogorgia	Leptogorgia flexilis	yes	0	NA	no	NA	NA	GAGAGTTAAAAAGTACGTGAAACCGTTGAAAGGGAAGCGAATGGAGTTAGCAATTCGCCCTGCTAGATTCAGTTGTTCGTGCTTCGCGACGTGCGCGCTCTCGATCCGCATGGACGAGACGTGTACGGATGCGACGTGCGGGCGGCGCACTTCTGGCGAGCGAGCGTCAGCGTCGGTTGTCGATGGGTGACAAGGACATGAGGAAGGTGAACTGGTCCTCGTGGCCGGTTGTTATAGCCTCTTGTTCGTATAGCCCGACGGCGACCGTGGCTCTGCGACGCGTGCCTGGCTGGTGATTCTCATGATCGGTCCGGCATGTCGACCGTGGCGGACGGCACGCCTGTGCGCTCAAACTGCTGCCGGTCGATCGTGGGTTTTTCACACACTACGCGTCTAGGA…
Soler-Hurtado et al. 2017, Molecular Phylogenetics & Evolution	KX767436.1	NA	Animalia	Cnidaria	Anthozoa	Malacalcyonacea	Gorgoniidae	Leptogorgia	Leptogorgia flexilis	yes	0	NA	no	NA	NA	GAGAGTTAAAAAGTACGTGAAACCGTTGAAAGGGAAGCGAATGGAGTTAGCAATTCGCCCTGCTAGATTCAGTTGTTCGTGCTTCGCGACGTGCGCGCTCTCGATCCGCATGGACGAGACGTGTACGGATGCGACGTGCGGGCGGCGCACTTCTGGCGAGCGAGCGTCAGCGTCGGTTGTCGATGGGTGACAAGGACATGAGGAAGGTGAACTGGTCCTCGTGGCCGGTTGTTATAGCCTCTTGTTCGTATAGCCCGACGGCGACCGTGGCTCTGCGACGCGTGCCTGGCTGGTGATTCTCATGATCGGTCCGGCATGTCGACCGTGGCGGACGGCACGCCTGTGCGCTCAAACTGCTGCCGGTCGATCGTGGGTTTTTCACACACTACGCGTCTAGGA…
Soler-Hurtado et al. 2017, Molecular Phylogenetics & Evolution	KX767437.1	NA	Animalia	Cnidaria	Anthozoa	Malacalcyonacea	Gorgoniidae	Pacifigorgia	Pacifigorgia sp.	yes	0	NA	no	NA	NA	GAGAGTTAAAAAGTACGTGAAACCGTTGAAAGGGAAGCGAATGGAGTTAGCAATTCGCCCTGCTAGATTCAGTTGTTCGTGCCTCGCGGCGTGCGCGCTCTCGATCCGCATGGACGAGACGTGTACGGATGCGGTGTGCGGGCGGCGCATTTCTGGCGAGCGAGCGTCAGCGTCGGTTGTCGATGGGCGACAAGGACGTGAGGAAGGTAGACTGGCCTCACGGCCGGTTGTTATAGCCTCTTGTTCGTATAGCCCGATGGCGACCGTGGCTCTGCGACGCGTGCCTGGCTGGTGACTCGTACGATCGGTCCGGCATGTCGACCGTGGCGGACGGCACGCCTGTGCGCTCAAACTGCTGCCGGTCGATCGCATGATGTTCACACACTACGCGTCTAGGAT…
Soler-Hurtado et al. 2017, Molecular Phylogenetics & Evolution	KX767438.1	NA	Animalia	Cnidaria	Anthozoa	Malacalcyonacea	Gorgoniidae	Pacifigorgia	Pacifigorgia catedralensis	yes	0	NA	no	NA	NA	GAGAGTTAAAAAGTACGTGAAACCGTTGAAAGGGAAGCGAATGGAGTTAGCAATTCGCCCTGCTAGATTCAGTTGTTCGTGCTTCGCGGCGTGCGCGCTCTCGATCCGCATGGACGAGACGTGTACGGATGCGATGTGCGGGCGGCGCATTTCTGGCGAGCGAGCGTCAGCGTCGGTTGTCGATGGGCGACAAGGACATGAGGAAGGTAGACTGGCCTCACGGCCGGTTGTTATAGCCTCTTGTTCGTATAGCCCGATGGCGACCGTGGCYCTGCGACGCGTGCCTGGCTGGTGACTCGTACGATCGGTCCGGCATGTCGACCGTGGCGGACGGCACGCCTGTGCGCTCAAACTGCTGCCGGTCGATCGCATGATGTTCACACACTACGCGTCTAGGAT…
Soler-Hurtado et al. 2017, Molecular Phylogenetics & Evolution	KX767439.1	NA	Animalia	Cnidaria	Anthozoa	Malacalcyonacea	Gorgoniidae	Pacifigorgia	Pacifigorgia cribrum	yes	0	NA	no	NA	NA	GAGAGTTAAAAAGTACGTGAAACCGTTGAAAGGGAAGCGAATGGAGTTAGCAATTCGCCCTGCTAGATTCAGTTGTTCGTGCTTCGCGGCGTGCGCGCTCTCGATCCGCATGGACGAGGCGTGTACGGATGCGATGTGCGGGCGGCGCATTTCTGGCGAGCGAGCGTCAGCGTCGGTTGTCGATGGGCGACAAGGACATGAGGAAGGTGAACTGGCCTCACGGCCGGTTGTTATAGCCTCTTGTTCGTATAGCCCGATGGCGACCGTGGCTCTGCGACGCGTGCCTGGCTGGTGACTCGTACGATCGGTCCGGCATGTCGACCGTGGCGGACGGCACGCCTGTGCGCTCAAACTGCTGCCGGTCGATCGCATGATGTTCACACACTACGCGTCTAGGAT…
Soler-Hurtado et al. 2017, Molecular Phylogenetics & Evolution	KX767440.1	NA	Animalia	Cnidaria	Anthozoa	Malacalcyonacea	Gorgoniidae	Pacifigorgia	Pacifigorgia cribrum	yes	0	NA	no	NA	NA	GAGAGTTAAAAAGTACGTGAAACCGTTGAAAGGGAAGCGAATGGAGTTAGCAATTCGCCCTGCTAGATTCAGTTGTTCGTGCTTCGCGGCGTGCGCGCTCTCGATCCGCATGGACGAGGCGTGTACGGATGCGATGTGCGGGCGGCGCATTTCTGGCGAGCGAGCGTCAGCGTCGGTTGTCGATGGGCGACAAGGACATGAGGAAGGTGAACTGGCCTCACGGCCGGTTGTTATAGCCTCTTGTTCGTATAGCCCGATGGCGACCGTGGCTCTGCGACGCGTGCCTGGCTGGTGACTCGTACGATCGGTCCGGCATGTCGACCGTGGCGGACGGCACGCCTGTGCGCTCAAACTGCTGCCGGTCGATCGCATGATGTTCACACACTACGCGTCTAGGAT…
Soler-Hurtado et al. 2017, Molecular Phylogenetics & Evolution	KX767441.1	NA	Animalia	Cnidaria	Anthozoa	Malacalcyonacea	Gorgoniidae	Pacifigorgia	Pacifigorgia sp.	yes	0	NA	no	NA	NA	GTACGTGAAACCGTTGAAAGGGAAGCGAATGGAGTTAGCAATTCGCCCTGCTAGATTCAGTTGTTCGTGCTTCGCGGCGTGCGCGCTCTCGATCCGCATGGACGAGACGTGTACGGATGCGATGTGCGGGCGGCGCATTTCTGGCGAGCGAGCGTCAGCGTCGGTTGTCGATGGGCGACAAGGACATGAGGAAGGTAGACTGGCCTCACGGCCGGTTGTTATAGCCTCTTGTTCGTATAGCCCGATGGCGACCGTGGCTCTGCGACGCGTGCCTGGCTGGTGACTCGTACGATCGGTCCGGCATGTCGACCGTGGCGGACGGCACGCCTGTGCGCTCAAACTGCTGCCGGTCGATCGCATGATGTTCACACACTACGCGTCTAGGATGCTGACGGCCAT…
Soler-Hurtado et al. 2017, Molecular Phylogenetics & Evolution	KX767442.1	NA	Animalia	Cnidaria	Anthozoa	Malacalcyonacea	Gorgoniidae	Pacifigorgia	Pacifigorgia sp.	yes	0	NA	no	NA	NA	GTACGTGAAACCGTTGAAAGGGAAGCGAATGGAGTTAGCAATTCGCCCTGCTAGATTCAGTTGTTCGTGCTTCGCGGCGTGCGCGCTCTCGATCCGCATGGACGAGACGTGTACGGATGCGATGTGCGGGCGGCGCATTTCTGGCGAGCGAGCGTCAGCGTCGGTTGTCGATGGGCGACAAGGACATGAGGAAGGTAGACTGGCCTCACGGCCGGTTGTTATAGCCTCTTGTTCGTATAGCCCGATGGCGACCGTGGCTCTGCGACGCGTGCCTGGCTGGTGACTCGTACGATCGGTCCGGCATGTCGACCGTGGCGGACGGCACGCCTGTGCGCTCAAACTGCTGCCGGTCGATCGCATGATGTTCACACACTACGCGTCTAGGATGCTGACGGCCAT…
Soler-Hurtado et al. 2017, Molecular Phylogenetics & Evolution	KX767443.1	NA	Animalia	Cnidaria	Anthozoa	Malacalcyonacea	Gorgoniidae	Pacifigorgia	Pacifigorgia firma	yes	0	NA	no	NA	NA	GAGAGTTAAAAAGTACGTGAAACCGTTGAAAGGGAAGCGAATGGAGTTAGCAATTCGCCCTGCTAGATTCAGTTGTTCGTGCTTCGCGGCGTGCGCGCTCTCGATCCGCATGGACGAGGCGTGTACGGATGCGATGTGCGGGCGGCGCATTTCTGGCGAGCGAGCGTCAGCGTCGGTTGTCGATGGGCGACAAGGACATGAGGAAGGTGAACTGGCCTTACGGCCGGTTGTTATAGCCTCTTGTTCGTATAGCCCGACGGCGACCGTGGCTCTGCGACGCGTGCCTGGCTGGTGACTCGTACGATCGGTCCGGCATGTCGACCGTGGCGGACGGCACGCCTGTGCGCTCAAACTGCTGCCGGTCGATCGCATGATGTTCACACACTACGCGTCTAGGAT…
Soler-Hurtado et al. 2017, Molecular Phylogenetics & Evolution	KX767444.1	NA	Animalia	Cnidaria	Anthozoa	Malacalcyonacea	Gorgoniidae	Pacifigorgia	Pacifigorgia flavimaculata	yes	0	NA	no	NA	NA	GAGAGTTAAAAAGTACGTGAAACCGTTGAAAGGGAAGCGAATGGAGTTAGCAATTCGCCCTGCTAGATTCAGTTGTTCGTGCTTCGCGGCGTGCGCGCTCTCGATCCGCATGGACGAGGCGTGTACGGATGCGATGTGCGGGCGGCGCATTTCTGGCGAGCGAGCGTCAGCGTCGGTTGTCGATGGGCGACAAGGACATGAGGAAGGTGAACTGGCCTTACGGCCGGTTGTTATAGCCTCTTGTTCGTATAGCCCGACGGCGACCGTGGCTCTGCGACGCGTGCCTGGCTGGTGACTCGTACGATCGGTCCGGCATGTCGACCGTGGCGGACGGCACGCCTGTGCGCTCAAACTGCTGCCGGTCGATCGCATGATGTTCACACACTACGCGTCTAGGAT…
Soler-Hurtado et al. 2017, Molecular Phylogenetics & Evolution	KX767445.1	NA	Animalia	Cnidaria	Anthozoa	Malacalcyonacea	Gorgoniidae	Pacifigorgia	Pacifigorgia sculpta	yes	0	NA	no	NA	NA	GAGAGTTAAAAAGTACGTGAAACCGTTGAAAGGGAAGCGAATGGAGTTAGCAATTCGCCCTGCTAGATTCAGTTGTTCGTGCTTCGCGGCGTGCGCGCTCTCGATCCGCATGGACGAGACGTGTACGGATGCGATGTGCGGGCGGCGCATTTCTGGCGAGCGAGCGTCAGCGTCGGTTGTCGATGGGCGACAAGGACATGAGGAAGGTGAACTGGCCTTACGGCCGGTTGTTATAGCCTCTTGTTCGTATAGCCCGACGGCGACCGTGGCTCTGCGACGCGTGCCTGGCTGGTGACTCGTACGATCGGTCCGGCATGTCGACCGTGGCGGACGGCACGCCTGTGCGCTCAAACTGCTGCCGGTCGATCGCATGATGTTCACACACTACGCGTCTAGGAT…
Soler-Hurtado et al. 2017, Molecular Phylogenetics & Evolution	KX767446.1	NA	Animalia	Cnidaria	Anthozoa	Malacalcyonacea	Gorgoniidae	Pacifigorgia	Pacifigorgia sculpta	yes	0	NA	no	NA	NA	GAGAGTTAAAAAGTACGTGAAACCGTTGAAAGGGAAGCGAATGGAGTTAGCAATTCGCCCTGCTAGATTCAGTTGTTCGTGCTTCGCGGCGTGCGCGCTCTCGATCCGCATGGACGAGACGTGTACGGATGCGATGTGCGGGCGGCGCATTTCTGGCGAGCGAGCGTCAGCGTCGGTTGTCGATGGGCGACAAGGACATGAGGAAGGTGAACTGGCCTTACGGCCGGTTGTTATAGCCTCTTGTTCGTATAGCCCGACGGCGACCGTGGCTCTGCGACGCGTGCCTGGCTGGTGACTCGTACGATCGGTCCGGCATGTCGACCGTGGCGGACGGCACGCCTGTGCGCTCAAACTGCTGCCGGTCGATCGCATGATGTTCACACACTACGCGTCTAGGAT…
Soler-Hurtado et al. 2017, Molecular Phylogenetics & Evolution	KX767447.1	NA	Animalia	Cnidaria	Anthozoa	Malacalcyonacea	Gorgoniidae	Pacifigorgia	Pacifigorgia sculpta	yes	0	NA	no	NA	NA	GAGAGTTAAAAAGTACGTGAAACCGTTGAAAGGGAAGCGAATGGAGTTAGCAATTCGCCCTGCTAGATTCAGTTGTTCGTGCTTCGCGGCGTGCGCGCTCTCGATCCGCATGGACGAGACGTGTACGGATGCGATGTGCGGGCGGCGCATTTCTGGCGAGCGAGCGTCAGCGTCGGTTGTCGATGGGCGACAAGGACATGAGGAAGGTGAACTGGCCTTACGGCCGGTTGTTATAGCCTCTTGTTCGTATAGCCCGACGGCGACCGTGGCTCTGCGACGCGTGCCTGGCTGGTGACTCGTACGATCGGTCCGGCATGTCGACCGTGGCGGACGGCACGCCTGTGCGCTCAAACTGCTGCCGGTCGATCGCATGATGTTCACACACTACGCGTCTAGGAT…
Soler-Hurtado et al. 2017, Molecular Phylogenetics & Evolution	KX767448.1	NA	Animalia	Cnidaria	Anthozoa	Malacalcyonacea	Gorgoniidae	Pacifigorgia	Pacifigorgia irene	yes	0	NA	no	NA	NA	GAGAGTTAAAAAGTACGTGAAACCGTTGAAAGGGAAGCGAATGGAGTTAGCAATTCGCCCTGCTAGATTCAGTTGTTCGTGCTTCGCGGCGTGCGCGCTCTCGATCCGCATGGACGAGACGTGTACGGATGCGGTGTGCGGGCGGCGCATTTCTGGCGAGCGAGCGTCAGCGTCGGTTGTCGATGGGCGACAAGGACATGAGGAAGGTAGACTGGCCTCACGGCCGGTTGTTATAGCCTCTTGTTCGTATAGCCCGATGGCGACCGTGGCTCTGCGACGCGTGCCTGGCTGGTGACTCGTACGATCGGTCCGGCATGTCGACCGTGGCGGACGGCACGCCTGTGCGCTCAAACTGCTGCCGGTCGATCGCATGATGTTCACACACTACGCGTCTAGGAT…
Soler-Hurtado et al. 2017, Molecular Phylogenetics & Evolution	KX767449.1	NA	Animalia	Cnidaria	Anthozoa	Malacalcyonacea	Gorgoniidae	Pacifigorgia	Pacifigorgia irene	yes	0	NA	no	NA	NA	GAGAGTTAAAAAGTACGTGAAACCGTTGAAAGGGAAGCGAATGGAGTTAGCAATTCGCCCTGCTAGATTCAGTTGTTCGTGCTTCGCGGCGTGCGCGCTCTCGATCCGCATGGACGAGACGTGTACGGATGCGGTGTGCGGGCGGCGCATTTCTGGCGAGCGAGCGTCAGCGTCGGTTGTCGATGGGCGACAAGGACATGAGGAAGGTAGACTGGCCTCACGGCCGGTTGTTATAGCCTCTTGTTCGTATAGCCCGATGGCGACCGTGGCTCTGCGACGCGTGCCTGGCTGGTGACTCGTACGATCGGTCCGGCATGTCGACCGTGGCGGACGGCACGCCTGTGCGCTCAAACTGCTGCCGGTCGATCGCATGATGTTCACACACTACGCGTCTAGGAT…
Soler-Hurtado et al. 2017, Molecular Phylogenetics & Evolution	KX767450.1	NA	Animalia	Cnidaria	Anthozoa	Malacalcyonacea	Gorgoniidae	Pacifigorgia	Pacifigorgia machalilla	yes	0	NA	no	NA	NA	GAGAGTTAAAAAGTACGTGAAACCGTTGAAAGGGAAGCGAATGGAGTTAGCAATTCGCCCTGCTAGATTCAGTTGTTCGTGCTTCGCGGCGTGCGCGCTCTCGATCCGCATGGACGAGACGTGTACGGATGCGGTGTGCGGGCGGCGCATTTCTGGCGAGCGAGCGTCAGCGTCGGTTGTCGATGGGCGACAAGGACATGAGGAAGGTAGACTGGCCTCACGGCCGGTTGTTATAGCCTCTTGTTCGTATAGCCCGATGGCGACCGTGGCTCTGCGACGCGTGCCTGGCTGGTGACTCGTACGATCGGTCCGGCATGTCGACCGTGGCGGACGGCACGCCTGTGCGCTCAAACTGCTGCCGGTCGATCGCATGATGTTCACACACTACGCGTCTAGGAT…
Soler-Hurtado et al. 2017, Molecular Phylogenetics & Evolution	KX767451.1	NA	Animalia	Cnidaria	Anthozoa	Malacalcyonacea	Gorgoniidae	Pacifigorgia	Pacifigorgia machalilla	yes	0	NA	no	NA	NA	GAGAGTTAAAAAGTACGTGAAACCGTTGAAAGGGAAGCGAATGGAGTTAGCAATTCGCCCTGCTAGATTCAGTTGTTCGTGCTTCGCGGCGTGCGCGCTCTCGATCCGCATGGACGAGACGTGTACGGATGCGGTGTGCGGGCGGCGCATTTCTGGCGAGCGAGCGTCAGCGTCGGTTGTCGATGGGCGACAAGGACATGAGGAAGGTAGACTGGCCTCACGGCCGGTTGTTATAGCCTCTTGTTCGTATAGCCCGATGGCGACCGTGGCTCTGCGACGCGTGCCTGGCTGGTGACTCGTACGATCGGTCCGGCATGTCGACCGTGGCGGACGGCACGCCTGTGCGCTCAAACTGCTGCCGGTCGATCGCATGATGTTCACACACTACGCGTCTAGGAT…
Soler-Hurtado et al. 2017, Molecular Phylogenetics & Evolution	KX767452.1	NA	Animalia	Cnidaria	Anthozoa	Malacalcyonacea	Gorgoniidae	Pacifigorgia	Pacifigorgia sp.	yes	0	NA	no	NA	NA	GAGAGTTAAAAAGTACGTGAAACCGTTGAAAGGGAAGCGAATGGAGTTAGCAATTCGCCCTGCTAGATTCAGTTGTTCGTGCYTCGCGGCGTGCGCGCTCTCGATCCGCATGGACGAGACGTGTACGGATGCGGTGTGCGGGCGGCGCATTTCTGGCGAGCGAGCGTCAGCGTCGGTTGTCGATGGGCGACAAGGACATGAGGAAGGTAGACTGGCCTCACGGCCGGTTGTTATAGCCTCTTGTTCGTATAGCCCGATGGCGACCGTGGCTCTGCGACGCGTGCCTGGCTGGTGACTCGTACGATCGGTCCGGCATGTCGACCGTGGCGGACGGCACGCCTGTGCGCTCAAACTGCTGCCGGTCGATCGCATGATGTTCACACACTACGCGTCTAGGAT…
Soler-Hurtado et al. 2017, Molecular Phylogenetics & Evolution	KX767453.1	NA	Animalia	Cnidaria	Anthozoa	Malacalcyonacea	Gorgoniidae	Pacifigorgia	Pacifigorgia sp.	yes	0	NA	no	NA	NA	GAGAGTTAAAAAGTACGTGAAACCGTTGAAAGGGAAGCGAATGGAGTTAGCAATTCGCCCTGCTAGATTCAGTTGTTCGTGCYTCGCGGCGTGCGCGCTCTCGATCCGCATGGACGAGACGTGTACGGATGCGGTGTGCGGGCGGCGCATTTCTGGCGAGCGAGCGTCAGCGTCGGTTGTCGATGGGCGACAAGGACATGAGGAAGGTAGACTGGCCTCACGGCCGGTTGTTATAGCCTCTTGTTCGTATAGCCCGATGGCGACCGTGGCTCTGCGACGCGTGCCTGGCTGGTGACTCGTACGATCGGTCCGGCATGTCGACCGTGGCGGACGGCACGCCTGTGCGCTCAAACTGCTGCCGGTCGATCGCATGATGTTCACACACTACGCGTCTAGGAT…
Soler-Hurtado et al. 2017, Molecular Phylogenetics & Evolution	KX767454.1	NA	Animalia	Cnidaria	Anthozoa	Malacalcyonacea	Gorgoniidae	Pacifigorgia	Pacifigorgia rubicunda	yes	0	NA	no	NA	NA	GAGAGTTAAAAAGTACGTGAAACCGTTGAAAGGGAAGCGAATGGAGTTAGCAATTCGCCCTGCTAGATTCAGTTGTTCGTGCTTCGCGGCGTGCGCGCTCTCGATCCGCATGGACGAGGCGTGTACGGATGCGATGTGCGGGCGGCGCATTTCTGGCGAGCGAGCGTCAGCGTCGGTTGTCGATGGGCGACAAGGACATGAGGAAGGTGAACTGGCCTCACGGCCGGTTGTTATAGCCTCTTGTTCGTATAGCCCGATGGCGACCGTGGCTCTGCGACGCGTGCCTGGCTGGTGACTCGTACGATCGGTCCGGCATGTCGACCGTGGCGGACGGCACGCCTGTGCGCTCAAACTGCTGCCGGTCGATCGCATGATGTTCACACACTACGCGTCTAGGAT…
Soler-Hurtado et al. 2017, Molecular Phylogenetics & Evolution	KX767455.1	NA	Animalia	Cnidaria	Anthozoa	Malacalcyonacea	Gorgoniidae	Pacifigorgia	Pacifigorgia rubicunda	yes	0	NA	no	NA	NA	GAGAGTTAAAAAGTACGTGAAACCGTTGAAAGGGAAGCGAATGGAGTTAGCAATTCGCCCTGCTAGATTCAGTTGTTCGTGCTTCGCGGCGTGCGCGCTCTCGATCCGCATGGACGAGGCGTGTACGGATGCGATGTGCGGGCGGCGCATTTCTGGCGAGCGAGCGTCAGCGTCGGTTGTCGATGGGCGACAAGGACATGAGGAAGGTGAACTGGCCTCACGGCCGGTTGTTATAGCCTCTTGTTCGTATAGCCCGATGGCGACCGTGGCTCTGCGACGCGTGCCTGGCTGGTGACTCGTACGATCGGTCCGGCATGTCGACCGTGGCGGACGGCACGCCTGTGCGCTCAAACTGCTGCCGGTCGATCGCATGATGTTCACACACTACGCGTCTAGGAT…
Soler-Hurtado et al. 2017, Molecular Phylogenetics & Evolution	KX767456.1	NA	Animalia	Cnidaria	Anthozoa	Malacalcyonacea	Gorgoniidae	Pacifigorgia	Pacifigorgia rubinoffi	yes	0	NA	no	NA	NA	GAGAGTTAAAAAGTACGTGAAACCGTTGAAAGGGAAGCGAATGGAGTTAGCAATTCGCCCTGCTAGATTCAGTTGTTCGTGCTTCGCGGCGTGCGCGCTCTCGATCCGCATGGACGAGACGTGTACGGATGCGATGTGCGGGCGGCGCATTTCTGGCGAGCGAGCGTCAGCGTCGGTTGTCGATGGGCGACAAGGACATGAGGAAGGTAGACTGGCCTCACGGCCGGTTGTTATAGCCTCTTGTTCGTATAGCCCGATGGCGACCGTGGCTCTGCGACGCGTGCCTGGCTGGTGACTCGTACGATCGGTCCGGCATGTCGACCGTGGCGGACGGCACGCCTGTGCGCTCAAACTGCTGCCGGTCGATCGCATGATGTTCACACACTACGCGTCTAGGAT…
Soler-Hurtado et al. 2017, Molecular Phylogenetics & Evolution	KX767457.1	NA	Animalia	Cnidaria	Anthozoa	Malacalcyonacea	Gorgoniidae	Pacifigorgia	Pacifigorgia rubripunctata	yes	0	NA	no	NA	NA	GAGAGTTAAAAAGTACGTGAAACCGTTGAAAGGGAAGCGAATGGAGTTAGCAATTCGCCCTGCTAGATTCAGTTGTTCGTGCTTCGCGGCGTGCGCGCTCTCGATCCGCATGGACGAGACGTGTACGGATGCGGTGTGCGGGCGGCGCATTTCTGGCGAGCGAGCGTCAGCGTCGGTTGTCGATGGGCGACAAGGACATGAGGAAGGTAGACTGGCCTCACGGCCGGTTGTTATAGCCTCTTGTTCGTATAGCCCGATGGCGACCGTGGCTCTGCGACGCGTGCCTGGCTGGTGACTCGTACGATCGGTCCGGCATGTCGACCGTGGCGGACGGCACGCCTGTGCGCTCAAACTGCTGCCGGTCGATCGCATGATGTTCACACACTACGCGTCTAGGAT…
Soler-Hurtado et al. 2017, Molecular Phylogenetics & Evolution	KX767458.1	NA	Animalia	Cnidaria	Anthozoa	Malacalcyonacea	Gorgoniidae	Pacifigorgia	Pacifigorgia sp.	yes	0	NA	no	NA	NA	GAGAGTTAAAAAGTACGTGAAACCGTTGAAAGGGAAGCGAATGGAGTTAGCAATTCGCCCTGCTAGATTCAGTTGTTCGTGCTTCGCGGCGTGCGCGCTCTCGATCCGCATGGACGAGACGTGTACGGATGCGATGTGCGGGCGGCGCATTTCTGGCGAGCGAGCGTCAGCGTCGGTTGTCGATGGGCGACAAGGACATGAGGAAGGTGAACTGGCCTTACGGCCGGTTGTTATAGCCTCTTGTTCGTATAGCCCGACGGCGACCGTGGCTCTGCGACGCGTGCCTGGCTGGTGACTCGTACGATCGGTCCGGCATGTCGACCGTGGCGGACGGCACGCCTGTGCGCTCAAACTGCTGCCGGTCGATCGCATGATGTTCACACACTACGCGTCTAGGAT…
Soler-Hurtado et al. 2017, Molecular Phylogenetics & Evolution	KX767459.1	NA	Animalia	Cnidaria	Anthozoa	Malacalcyonacea	Gorgoniidae	Pacifigorgia	Pacifigorgia sp.	yes	0	NA	no	NA	NA	GAGAGTTAAAAAGTACGTGAAACCGTTGAAAGGGAAGCGAATGGAGTTAGCAATTCGCCCTGCTAGATTCAGTTGTTCGTGCTTCGCGGCGTGCGCGCTCTCGATCCGCATGGACGAGACGTGTACGGATGCGATGTGCGGGCGGCGCATTTCTGGCGAGCGAGCGTCAGCGTCGGTTGTCGATGGGCGACAAGGACATGAGGAAGGTGAACTGGCCTTACGGCCGGTTGTTATAGCCTCTTGTTCGTATAGCCCGACGGCGACCGTGGCTCTGCGACGCGTGCCTGGCTGGTGACTCGTACGATCGGTCCGGCATGTCGACCGTGGCGGACGGCACGCCTGTGCGCTCAAACTGCTGCCGGTCGATCGCATGATGTTCACACACTACGCGTCTAGGAT…
Soler-Hurtado et al. 2017, Molecular Phylogenetics & Evolution	KX767460.1	NA	Animalia	Cnidaria	Anthozoa	Malacalcyonacea	Gorgoniidae	Pacifigorgia	Pacifigorgia sp.	yes	0	NA	no	NA	NA	AGAGTTAAAAAGTACGTGAAACCGTTGAAAGGGAAGCGAATGGAGTTAGCAATTCGCCCTGCTAGATTCAGTTGTTCGTGCTTCGCGGCGTGCGCGCTCTCGATCCGCATGGACGAGACGTGTACGGATGCGGTGTGCGGGCGGCGCATTTCTGGCGAGCGAGCGTCAGCGTCGGTTGTCGATGGGCGACAAGGACATGAGGAAGGTAGACTGGCCTCACGGCCGGTTGTTATAGCCTCTTGTTCGTATAGCCCGATGGCGACCGTGGCTCTGCGACGCGTGCCTGGCTGGTGACTCGTACGATCGGTCCGGCATGTCGACCGTGGCGGACGGCACGCCTGTGCGCTCAAACTGCTGCCGGTCGATCGCATGATGTTCACACACTACGCGTCTAGGATG…
Soler-Hurtado et al. 2017, Molecular Phylogenetics & Evolution	KX767461.1	NA	Animalia	Cnidaria	Anthozoa	Malacalcyonacea	Gorgoniidae	Pacifigorgia	Pacifigorgia sp.	no	NA	NA	no	NA	NA	GAGAGTTAAAAAGTACGTGAACCGTTGAAAGGGAAGCGAATGGAGTTAGCAATTCGCCCTGCTAGATTCAGTTGTTCGTGCTTCGCGGCGTGCGCGCTCTCGATCCGCATGGACGAGGCGTGTACGGATGCGATGTGCGGGCGGCGCATTTCTGGCGAGCGAGCGTCAGCGTCGGTTGTCGATGGGCGACAAGGACATGAGGAAGGTGAACTGGCCTCACGGCCGGTTGTTATAGCCTCTTGTTCGTATAGCCCGATGGCGACCGTGGCTCTGCGACGCGTGCCTGGCTGGTGACTCGTACGATCGGTCCGGCATGTCGACCGTGGCGGACGGCACGCCTGTGCGCTCAAACTGCTGCCGGTCGATCGCATGATGTTCACACACTACGCGTCTAGGATG…
Soler-Hurtado et al. 2017, Molecular Phylogenetics & Evolution	KX767462.1	NA	Animalia	Cnidaria	Anthozoa	Malacalcyonacea	Gorgoniidae	Pacifigorgia	Pacifigorgia sp.	yes	0	NA	no	NA	NA	GAGAGTTAAAAAGTACGTGAAACCGTTGAAAGGGAAGCGAATGGAGTTAGCAATTCGCCCTGCTAGATTCAGTTGTTCGTGCTTCGCGGCGTGCGCGCTCTCGATCCGCATGGACGAGACGTGTACGGATGCGATGTGCGGGCGGCGCATTTCTGGCGAGCGAGCGTCAGCGTCGGTTGTCGATGGGCGACAAGGACATGAGGAAGGTAGACTGGCCTCACGGCCGGTTGTTATAGCCTCTTGTTCGTATAGCCCGATGGCGACCGTGGCTCTGCGACGCGTGCCTGGCTGGTGACTCGTACGATCGGTCCGGCATGTCGACCGTGGCGGACGGCACGCCTGTGCGCTCAAACTGCTGCCGGTCGATCGCATGATGTTCACACACTACGCGTCTAGGAT…
Soler-Hurtado et al. 2017, Molecular Phylogenetics & Evolution	KX767463.1	NA	Animalia	Cnidaria	Anthozoa	Malacalcyonacea	Gorgoniidae	Pacifigorgia	Pacifigorgia sp.	yes	0	NA	no	NA	NA	GAGAGTTAAAAAGTACGTGAAACCGTTGAAAGGGAAGCGAATGGAGTTAGCAATTCGCCCTGCTAGATTCAGTTGTTCGTGCTTCGCGGCGTGCGCGCTCTCGATCCGCATGGACGAGGCGTGTACGGATGCGATGTGCGGGCGGCGCATTTCTGGCGAGCGAGCGTCAGCGTCGGTTGTCGATGGGCGACAAGGACATGAGGAAGGTGAACTGGCCTCACGGCCGGTTGTTATAGCCTCTTGTTCGTATAGCCCGATGGCGACCGTGGCTCTGCGACGCGTGCCTGGCTGGTGACTCGTACGATCGGTCCGGCATGTCGACCGTGGCGGACGGCACGCCTGTGCGCTCAAACTGCTGCCGGTCGATCGCATGATGTTCACACACTACGCGTCTAGGAT…
Soler-Hurtado et al. 2017, Molecular Phylogenetics & Evolution	KX767464.1	NA	Animalia	Cnidaria	Anthozoa	Malacalcyonacea	Gorgoniidae	Pacifigorgia	Pacifigorgia stenobrochis	yes	1	29	no	NA	NA	GAGAGTTAAAAAGTACGTGAAACCGTTGNAAGGGAAGCGAATGGAGTTAGCAATTCGCCCTGCTAGATTCAGTTGTTCGTGCTTCGCGGCGTGCGCGCTCTCGATCCGCATGGACGAGACGTGTACGGATGCGATGTGCGGGCGGCGCATTTCTGGCGAGCGAGCGTCAGCGTCGGTTGTCGATGGGCGACAAGGACATGAGGAAGGTGAACTGGCCTTACGGCCGGTTGTTATAGCCTCTTGTTCGTATAGCCCGACGGCGACCGTGGCTCTGCGACGCGTGCCTGGCTGGTGACTCGTACGATCGGTCCGGCATGTCGACCGTGGCGGACGGCACGCCTGTGCGCTCAAACTGCTGCCGGTCGATCGCATGATGTTCACACACTACGCGTCTAGGAT…
Quattrini et al. 2016, Oecologia	KX890210.1	NA	Animalia	Cnidaria	Anthozoa	Malacalcyonacea	Paramuriceidae	Acanthogorgia	Acanthogorgia aspera	NA	NA	NA	no	NA	NA	AAACCGTTGAAAGGGAAGCGAATGGAGTTAGCAATTTGCCCTGCCAGATTCAGTTGCTCGCACGTCGCGACGTACGCGCTCTCGATCCGCATGGACGAGACGTGTGCGGGTGCGACGTGCGGTCTGCGCACTTCTGGCGAGCGAGCGTCAGCGTCGGTTGTCGACGGGCGACAAGGATGCGGGGAAGGTGCGCCGGCCTTCGCGGCTGGCCGTTATAGCCCTGCGATCGCATAGCTCGACGGCGACCGTGGCTCTGCGACGCGTGCCTGGCTGGCGACTCGAAGGATCGGTCCGGCATGTCGACCGTGGCGGACGGCACGCCTGTGCGCTCGAACTGCTGCCGGCCGATCGGACGATGTTCGCACACTACGCGTCGAGGATGCTGACGGCCATACGGCT…
Quattrini et al. 2016, Oecologia	KX890211.1	NA	Animalia	Cnidaria	Anthozoa	Scleralcyonacea	Chelidonisididae	Chelidonisis	Chelidonisis aurantiaca mexicana	NA	NA	NA	no	NA	NA	AAACCGTTGAAAGGGAAGCGAATGGAACTTAAAATTCGCTTTGCCAGATTCAGTCCCTTGCGTCCTCCAACGTGAGTGTTCTCGATCTTTTTAGACGGGACGCGTACGGACGGCGGAACGTGGGCGGTGCATTTCTGGTAGGCGAGCGTCAACATCACTTGGCCGCGAGTTAGAAAGCTGCGAGGAAGGTAGGTCCTTCGGGATCGTTAAGCCTTGCCAGCAAATAACTCGAGGCCGACTGTGGCTTGTCGCAACGCGTGCCTCCCCTCGGGGCAGGCTGGTGTCTTGTTTTGTTGGTATGGTCGGCGATGGCGACGGACGACGGTTGCCTGTGCGTCCGAACTGCGGCCTGTCGACAGGATGGTGAACATACACCACGCGTTGAGGATGCTGACGAAA…
Quattrini et al. 2016, Oecologia	KX890212.1	NA	Animalia	Cnidaria	Anthozoa	Scleralcyonacea	Chrysogorgiidae	Chrysogorgia	Chrysogorgia sp.	NA	NA	NA	no	NA	NA	AAACCGTTGGAAGGGAAGCGAGTGGAGTCGGTTATTCGCCTTGCCAGATTCATCCGCTCTCGTGCCGCAACGTGTTCTCTCGTGACCTGAATCCAGGCGCGGATGGCGCGGGCGTGGCACGGGCGTGGTGCACTTCGGCGGGCGAGCGTCAACGTCAGTCAACTGCGAGTCACAAACCTGCAAGCACGGTACATCTTTCGCGATGGGTAAGGCTTGCGTGCGCATGACTCGCGCGAGACTGTATTGTGTCGCAGCGTGTTCCCTCCCGTCCCGCGGGTGGGCTGCTGTCCAGTGTTGTTGATCCGGTGATCCGTTCCGGCGGACGGCCGTGCGCCTGTGCGTCGGCGGTGTCGCCGTTCAACTGACCTGGAACGCAGACACCACGCGCTCAGTACGTTG…
Quattrini et al. 2016, Oecologia	KX890213.1	NA	Animalia	Cnidaria	Anthozoa	Scleralcyonacea	Coralliidae	Hemicorallium	Hemicorallium niobe	NA	NA	NA	no	NA	NA	AAACCGTTAAAAGGGAAGCGAATGAAACCAGCAATTTGCCTTGCCGCATTCAGTCGCCTGCGCTCGATCACGTGCTTGTTCGCGATTTTTTTAGACGMGATTCGTMCAATTGGCCGAGCGAAGGCGGCGCACTTCTGGTAGGTGAGTGTCAGCATCAGATGGTCACGGGTTAGAAAGTTGCGATGAAGGTAGATCTTTCGGGATTGTTCAGCGTCGCAAACAAATCACCCGAGGCTGCCTGTGGTCTGTCGCAATGCGTGCCTCCGTGGGTTTGGCTGGTGTCCTGTCCTGTTGATGCGGTTGCCGACTGCGGCGGACGGCTATGCCAGTGCGTCCAAACCGCTGCCCGTCTACAGGTCGGGGTGCACACACCACGCGTTGACGATGCTGACGAAAATA…
Quattrini et al. 2016, Oecologia	KX890214.1	NA	Animalia	Cnidaria	Anthozoa	Scleralcyonacea	Chrysogorgiidae	Iridogorgia	Iridogorgia magnaspiralis	NA	NA	NA	no	NA	NA	AAACCGTTGGAAGGGAAGCGAATGGAGTCGGAAATTCGCCTTTTCGGATTCAACCCCTCGCCTACTGCGACGTGCTATCTCGCGACCTGTCGCCAGGCGTGGTTCGTGCGGCCGCAGTTCGCAGGTGGTGCACTTCCGACCGGCGAGTGTCAACGTCAGTCGACGGCGAGCAAAGGGGCCGCGAGTACGGTAGGTCCTTCGGGGCCGGTAAGTCTCGCGTGCACGTGGCTCGCACCAGACTGTCTTCTGTCGCAGCGCGTGCCGCCCTACGCGGGGCGGCTGCTGCCTTTGTTGTTGGTCTGGCGATGCTTTCGAGCGGACGGCTTCGCCTGTGCGTTTGTAGCGCCGCTGACCAACCGACAGAGAACGCAGACACGACGCGCTGAGGACGTTGATCGC…
Quattrini et al. 2016, Oecologia	KX890215.1	NA	Animalia	Cnidaria	Anthozoa	Scleralcyonacea	Chrysogorgiidae	Iridogorgia	Iridogorgia splendens	NA	NA	NA	no	NA	NA	AAACCGTTGGAAGGGAAGCGAATGGAGTCGGCAATTCGCCTTTTCAGATTCAACCCCTCGCCTGCTGCGACGTGCTGTCTCGCGACCTGTCGCCAGGCGTGGTTCGTGCGGCCGCAGTACGCAGGTGGTGCACTTCCGACGGGCGAGTGTCAACGTCAGTCGACGGCGAGCAAAGGGGCCGCGAGTACGGTAGGTCCTTCGGGCCCGGTATGTCTCGCGCGCACGTGGCTCGCACCAGACTGTCTTCTGTCGCAGTGCGTGCCGCCCTTCGCGGGGCGGCTGCTGCCTTTGTTGTTGGCCTGGCGATGCTGTCGAGCGGACGGCTTCGCCTGTGCGTTTGTAGCGCCGCTGACCAACCGACGGAGAACGCAGACACGACGCGCTGAGGACGTTGATCGC…
Quattrini et al. 2016, Oecologia	KX890216.1	NA	Animalia	Cnidaria	Anthozoa	Scleralcyonacea	Keratoisididae	Lepidisis	Lepidisis sp.	NA	NA	NA	no	NA	NA	AAACCGCTGGAAGGGAAGCGAATGGAGTCGACAATTCACCTGATCAGATTCAGTCACTCGCATTCCACAACGCGCTCGCACTTCGCGATCTTTCCAGACGCAGCTTGTGCGACGTGGGACGGGCGTGGTGCACTTCTGTCACGTGAGCGTCAACGTCAGTTCACTGCGAGTCAAACGGCCCCGAGGACGGTAGGTCCCCCTTTCGGGGGATCGGTAAGCCTCTTGTGCACACGACTCCACGTGGACTGTGTCCTGTCGCAGCGCGCGCCTCCCTTTCCAGGGCAGGCTGCAGTCTCGTCGCTCTACCGTTCACTGTGCTAGACGGACGGCGACGCCTGTGCGTCACAAGCGCGCACGGTCGAGTGGCGAGCGACACCGACACGACGCGCTGAGTACGTT…
Quattrini et al. 2016, Oecologia	KX890217.1	NA	Animalia	Cnidaria	Anthozoa	Malacalcyonacea	Paramuriceidae	Muriceides	Muriceides sp.	NA	NA	NA	no	NA	NA	AAACCGTTGAAAGGGAAGCGAATGGAGTTAGCAATTCGCCCTGCCAGATTCAGTTGCTCGTGCGTCGCGACGCACGCGCTCTCGATCCGCATGGACGAGACGTGTGCGGGTGCGACGCGCGGTCGGCGCACTTCTGGCGAGCGAGCGTCAGCGTCGGTTGTCGACGGGCGATAAGGACACGAGGAAGGTAGACCGGCCTCAACCGCCGGTTGTTAAGCCTTGTGCTCGCATAGCTCGACGGCGACCGTGGCTCGGCGACGCGTGCCTGGCTGGCGACTCGAACGATCGGTCCGGCATGTCGACCGTGGCGGACGGCACGCCTGTGCGCTCAAACTGCTGCCGGTCGATCGGACGATGTTCGCACACTACGCGTCGAAGATGCTGACGGCCATACGGCTC…
Quattrini et al. 2016, Oecologia	KX890218.1	NA	Animalia	Cnidaria	Anthozoa	Scleralcyonacea	Primnoidae	Narella	Narella pauciflora	NA	NA	NA	no	NA	NA	AAACCGCTGGAAGGGAAGCGAATGGAGTTCGCAACACGCCTTGTCGGATTCAGCTGCTCCAGTTGCGCGTCGTGCTCTGCCTCGATCTTTCTAGACGAGCCTTGCGCGGTCGCGTACGTGGGCGGTGCACTTCCGGTCGGCGAAAGTCAACGTCGGTTTGCCGCCAGAGTTAAAAAGCTGCGAGCACGGTAGGTCCGTCCGCGGATCGGTAAGGCTYGTATGCACATATGACTCGCTGCAGACCGAGTTYTGCCGCAGCGCGTACCTCTTTTCGGGGCAGGCTGCTGTCTTTATCGTTGAATCGGGTACAATGTCACTGGACGGACGGCTTTGCCTGTGCGTCCGCGTGCGGCCGTTCAAACGATGAGGCAAACAGACACGACGCGCTGAGGACGTTGA…
Quattrini et al. 2016, Oecologia	KX890219.1	NA	Animalia	Cnidaria	Anthozoa	Scleralcyonacea	Ellisellidae	Nicella	Nicella sp.	NA	NA	NA	no	NA	NA	AAACCGTTGAAAGGGAAGCGAATGGAGTTAGCAATTCGCCCCGCCAGATTCAGTCTTACGCGTTCCGCGACGGGCGCGCACTCGATCTACGTAGACGAGTCGTGTACGGACGCGGGACGGGAGAGGCGCACTTATGGCGGGCGAGCGTCAACGTCGGTCTTCGYCGAGCTAAAAGGCCGTGAGGGAGGTGAACCACCTTCGGGCGGTTGTTATAACCTCGCGAACGTATCGCTCGAGGAAGACCGTGGAGTCGCGACGCGTGCCTCCTTTCGAGGGGGCTGGTGTCCTGTTTTGTTGGTCCGGTTGTCGACCGTGGCGGACGGCACGCCTGTGCGCTCGAACTGCTGCCGGTCAACAGGGCGGTGATCACACACTACGCGTCGAGGACGTTGACGACCA…
Quattrini et al. 2016, Oecologia	KX890220.1	NA	Animalia	Cnidaria	Anthozoa	Scleralcyonacea	Primnoidae	Paracalyptrophora	Paracalyptrophora carinata	NA	NA	NA	no	NA	NA	AAACCGCTGGAAGGGAAGCGAATGGAGTCGGCGATTCGCCTTGTCGGATTCAGCCGCCCCAGTAGCGCCTCGTGCTCGCTCTCGATCTTTCGAGACGAGCCTTGTGCGCGTGCGTACGTGGGCGGTGCACTTCCGGCAGGCGAACGTCAACGTCGGTTTGCCACGAGTCACAAAGCTGCGAGCACGGTAGGTCCCTCGGGATCGGTAAGGCTCGTATGCACATGGCTCGATGCAGACCGAGTTCTGGCGCAGCGCGTGCCCTCCCTTCGGGGCAGGCTGCTGTCTTTGTCGTTGACTCGGTCGCGCCGCTCGACGGACGGCTTTGCCTGTGCGTCGTGGTGCGGCCGACCAATCGATTGAGCAAACAGACACGACGCGCTGAGGACGTTGACCGCCCAG…
Quattrini et al. 2016, Oecologia	KX890221.1	NA	Animalia	Cnidaria	Anthozoa	Scleralcyonacea	Coralliidae	Paragorgia	Paragorgia regalis	NA	NA	NA	no	NA	NA	AAACCGTTAAAAGGGAAGCGAATGAAACCAGCAATTTGCCTTGCCGGATTCAGTCGCCTGCGCTCGATCRCGTGCTTGTTCGCGATTTTTTTAAACGCGGYTCGTACAATTGGCCGAGCGAAGGCGGCGCACTTCTGGTAGGTGAGTGTCAGCATCAGATGGTCACGGGTTAGAAAGTTGCGATGAAGGTAGATCCTTCGGGATTGTTCAGCGTCGCAAACAAATCACCCGAGGCTGCCTGTGGTCTGTCGCAATGCGTGCCTTCCGTGGGTTGGCTGGTGTCCTGTCCTGTTGATGCGGTTGTCGACTGCGGCGGACGGCTATGCCAGTGCGTCCAAACCGCTGCCCGTCTCCAGATCGGGGTGCACACACCACGCGTTGACGATGCTGACGAAAATA…
Quattrini et al. 2016, Oecologia	KX890222.1	NA	Animalia	Cnidaria	Anthozoa	Malacalcyonacea	Plexauridae			NA	NA	NA	no	NA	NA	AAACCGTTGAAAGGGAAGCGAATGGAGTTAGCAATTCGCCCCGCCAGATTCAGTTGCTCGCACGTCGCGACGTACGCGCCCTCGATCCGCATGGACGAGGCGTGTGCGGGTGCGACGTGCGGTCTGCGCACTTCTGGCGAGCGAGCGTCAGCGTCGGTTGTCGACGGGCGACAAGGACGCGGGGAAGGTGGACTGGCCTTCGCGGCCGGTTGTTACAGCCCCGTGCTCGCATAGCTCGACGGCGACCGTGGCTCGGCGACGCGTGCCTGGCTGGTGACTCGAACGATCGGTCCGGCATGTCGACCGTGGCGGACGGCACGCCTGTGCGCTCAAACCGCTGCCGGCCGATCGGACGATGTTCACACACTACGCGTCAATGATGCTGACGGCCATACGGCT…
Quattrini et al. 2016, Oecologia	KX890223.1	NA	Animalia	Cnidaria	Anthozoa	Malacalcyonacea	Scleracidae	Scleracis	Scleracis guadalupensis	NA	NA	NA	no	NA	NA	AAACCGTTGAAAGGGAAGCGAATGGAGTTAGCAATTCGCCCTGCCAGATTCAGTTGATCGTGCTTCGCGACGTGCGCGCTCTCGATCCGCATGGACGAGACGTGTGCGGGTGCGATGCTCGGTCGGCGCACTTCTGGCGAGCGAGCGTCAGCGTCGGTTGTCGACGGGCGACAAGGACACGAGGAAGGTGGGCCGGTCTTCGCGGCCGGTTGTTAAGCCTCGTGCTCGCATAGCTCGACGGCGACCGTGGCTCTGCGACGCGTGCCTGGCTGGCGACTCGTACGATCGGTTCGGCATGTCGACCGTGGCGGACGGCACGCCTGTGCGCTCAAACTGCTGCCGGTCGATCGTTCGATGTTCGCACACTACGCGTCGAAGATGCTGACGGCCATACGGCTC…
Quattrini et al. 2016, Oecologia	KX890224.1	NA	Animalia	Cnidaria	Anthozoa	Scleralcyonacea	Coralliidae	Sibogagorgia	Sibogagorgia cauliflora	NA	NA	NA	no	NA	NA	AAACCGTTAAAAGGGAAGCGAATGAAACCAGCAATTTGCCTTGCCGGATTCAGTCGCCTGCGCTCGATCACGTGCTTGTTCGCGATTTTTTTARACGCGACTCGTACAATTGGCCGAGCGAAGGCGGCGCACTTCTGGTAGGTGAGTGTCAGCATCAKATGGCCACGGGTTAGAAAGTTGCGATGAAGGTAGATCCTTCGGGATTGTTCAGCGTCGCAAACAAATCACCCGAGGCCGCCTGTGGTCTGTCGCAACGCGTGCCTCCGTGGGTTGGCTGGTGTCCTGTCCTGTTGATGCGGTTGTCGACTGCGGCGGACGGCTATGCCAGTGCGTCCAAACCGCTGCCCGTCTACARATCGGGGTGCACACACCACGCGTTGACGATGCTGACGAAAATAC…
Quattrini et al. 2016, Oecologia	KX890225.1	NA	Animalia	Cnidaria	Anthozoa	Malacalcyonacea	Gorgoniidae	Callistephanus	Callistephanus sp.	NA	NA	NA	no	NA	NA	AAACCGTTGAAAGGGAAGCGAATGGAGTTAGCAATTCGCCCTGCCAGATTCAGTTGTTCGTGCTTCGCGACGTGCGCGCTCTCGATCCGCATGGACGAGACGTGTACGGATGCGATGCGTGGGCGGCGCACTTCTGGCGAGCGAGCGTCAGCGTCGGTTGTCGACGGGCGACAAGGACATGAGGAAGGTGAACTGGCCTTTACGGCCGGTTGTTAAGCCTCTTGCTCGCATAGCCCAACGGCGACCGTGGCTCTGCGACGCGTGCCTSGGGCTGGTGACTCTTACGATCGGTCCGGCATGTCGACGGCGGCGGACGGCACGCCTGTGCGCTCAAACTGCTGCCGGTCGATCGAATGATGTTCACACACTGCGCGTCGAAGATGCTGACGGCCATACGGC…
Quattrini et al. 2016, Oecologia	KX890226.1	NA	Animalia	Cnidaria	Anthozoa	Malacalcyonacea	Gorgoniidae	Callistephanus	Callistephanus cf. koreni	NA	NA	NA	no	NA	NA	AAACCGTTGAAAGGGAAGCGAATGGAGTTAGCAATTCGCCCTGCCAGATTCAGTTGTTCGTGCTTCGCGACGTGCGCGCTCTCGATCCGCATGGACGAGACGTGTACGGATGCGATGCGTGGGCGGCGCACTTCTGGCGAGCGAGCGTCAGCGTCGGTTGTCGACGGGCGACAAGGACTTGAGGAAGGTGAACCGGCCTTTACGGCCGGTTGTTAAGCCTCTTGCTCGCATAGCCCAACGGCGACCGTGGCTCTGCGACGCGTGCCTGGCTGGTGACTCTTACGATCGGTCCGGCATGTCGACCGTGGCGGACGGCACGCCTGTGCGCCCAAACTGCTGCCGGTCGATCGAATGATGTTCACACACTACGCGTCGAAGATGCTGACGGCCATACGGCTC…
Shimpi et al. 2019, Systematics & Biodiversity	KY786087.1	NA	Animalia	Cnidaria	Anthozoa	Scleractinia	Poritidae	Porites	Porites sp	yes	1	28	yes	0	NA	GAGAGTTAAAAAGTACGTGAAACCGTTTGAAGGGAAACGAATGGACTCAGCAATGCGCCCTTTGAGATTCAGCCGGGCGGTTGTGGCGGTCCGGGGCTTGCGGATCTGAATGGACCGCGGTCTCGGGCCCGTCGCTTCCGACCGTCGCACTTCTCTTGGACGCGAGTCAACGTCGGTTGGGACTGGGCCTCAAAGGTTCCGGGAAGGTAGGTCCGGACGCTCGCGTTCGGACTGTTACAGCCCGGTTCTCTCGCGGCTCGGGCCCGACCGAGGCGGATGCAGCACATGCCTCTTCTGGCTAGGGTCCCGTCCTTCCGGCCGGTTGTCGAATGCGGTGGACTGCTTGCAGTGCTCTGCGACTGCTGCCGGTCGTTGGGGTGGTGATCTCGTACCATGTGC…
Shimpi et al. 2019, Systematics & Biodiversity	KY786088.1	NA	Animalia	Cnidaria	Anthozoa	Scleractinia	Poritidae	Porites	Porites sp	yes	1	28	yes	0	NA	GAGAGTTAAAAAGTACGTGAAACCGTTTGAAGGGAAACGAATGGACTCAGCAATGCGCCCTTTGAGATTCAGCCGGGCGGTTGTGGCGGTCCGGGGCTTGCGGATCTGAATGGACCGCGGTCTCGGGCCCGTCGCTTCCGACCGTCGCACTTCTCTTGGACGCGAGTCAACGTCGGTTGGGACTGGGCCTCAAAGGTTCCGGGAAGGTAGGTCCGGACGCTCGCGTTCGGACTGTTACAGCCCGGTTCTCTCGCGGCTCGGGCCCGACCGAGGCGGATGCAGCACATGCCTCTTCTGGCTAGGGTCCCGTCCTTCCGGCCGGTTGTCGAATGCGGTGGACTGCTTGCAGTGCTCTGCGACTGCTGCCGGTCGTTGGGGTGGTGATCTCGTACCATGTGC…
Shimpi et al. 2019, Systematics & Biodiversity	KY786089.1	NA	Animalia	Cnidaria	Anthozoa	Scleractinia	Poritidae	Porites	Porites sp	yes	1	28	yes	0	NA	GAGAGTTAAAAAGTACGTGAAACCGTTTGAAGGGAAACGAATGGACTCAGCAATGCGCCCTTTGAGATTCAGCCGGGCGGTGGTGGCGGTCCGGGGCTTGCGGATCTGAATGGACCGCGGTCTCGGGCCCGTCGCTTCCGACCGTCGCACTTCTCTTGGACGCGAGTCAACGTCGGTTGGGACTGGGCCTCAAAGGTTCCGGGAAGGTAGGTCCGGACGCTCGCGTTGGGACTGTTAAACAGCCCGGTTCTCTCGCGGCTCGGGCCCGACCGAGGCGGATGCAGCACATGCCTCTTGTGGCTAGGGTCCCGTCCTTCCGGCCGGTTGTCGAATGCGGTGGACTGCTTGCAGTGCTCTGCGCCTGCTGCCGGTCGTTGGGGTGGTGATCTCGTACCATGT…
Shimpi et al. 2019, Systematics & Biodiversity	KY786090.1	NA	Animalia	Cnidaria	Anthozoa	Scleractinia	Poritidae	Porites	Porites sp	yes	1	28	yes	0	NA	GAGAGTTAAAAAGTACGTGAAACCGTTTGAAGGGAAACGAATGGACTCAGCAATGCGCCCTTTGAGATTCAGCCGGGCGGTTGTGGCGGTCCGGGGCTTGCGGATCTGAATGGACCGCGGTCTCGGGCCCGTCGCTTCCGACCGTCGCACTTCTCTTGGACGCGAGTCAACGTCGGTTGGGACTGGGCCTCAAAGGTTCCGGGAAGGTAGGTCCGGACGCTCGCGTTCGGACTGTTACAGCCCGGTTCTCTCGCGGCTCGGGCCCGACCGAGGCGGATGCAGCACATGCCTCTTCTGGCTAGGGTCCCGTCCTTCCGGCCGGTTGTCGAATGCGGTGGACTGCTTGCAGTGCTCTGCGACTGCTGCCGGTCGTTGGGGTGGTGATCTCGTACCATGTGC…
Shimpi et al. 2019, Systematics & Biodiversity	KY798869.1	NA	Animalia	Cnidaria	Anthozoa	Scleractinia	Dendrophylliidae	Duncanopsammia	Duncanopsammia sp.	yes	0	NA	yes	0	NA	GAGAGTTAAAAAGTACGTGAAACCGTTGAAAGGGAAACGAATGGACTCAGCAATGCGCCGTTTGAGATTCAGCCGGCCGGTGAAATCGGCCCGGGCTTTGCGGATTCGAATGGACCGCGGTCTCGGGCTCGGTCTTCCCGTCCGTCGCACTTCTCTTGGGCGCACGTCAACGTCGGTTGGGACTGGGTGTCAAAGGTTCCGGGAAGGTAGGTCCGCGCTCTCCTCGCGTTGGCGCGTACTGTTATAGCCCGGTTCTCTTGCGGCTCGGGCCCGACCGAGGCGGTTTGCAGCGCATGCCTCTTTTGGCTAGGGTCCCGTCCGTCCGGCCGGTTGTCGACCGCGGTGGACTGCTCGCAGTGCTCCGCGACTGCTGCCGGTCGATCGGGCGGTGATCTCGTA…
Koido et al. 2022, ZooKeys	LC656681.1	NA	Animalia	Cnidaria	Anthozoa	Malacalcyonacea	Xeniidae	Xenia	Xenia sp.	yes	1	32	no	NA	NA	GAGAGTTAAAAAGTACGTGAAACCGTTGAAAAGGAAGCGAATGGAGTTAGCAATTCGTCTGTCAGATTCAGTTGCATGCACGCAGCAACGTTTACACTTTTGATCCGCATGGACAAGGTGTTTACGGGTGCAACGTGCAGGCAGCGCACTTTTGGCAGGCGAGCGTCAGCATTGGTTGTTGTTGAGCGATAAGGTTGTAAGGAAGGTAGACGAATTTATCGTTGTTAAGCCTTGCATTCGCATAGTTTTATGGCAACCAAGGCACTGCAACGCGTGCTTTGCTGGCAACCCAACTTCTCGGTCCGACATGTGACTGTGGTGGACGGCACGCCTGTGCACTCGAACTGCTGTCGGTCGCGTGTTGGTGTTTGCACATTACGCGTTAAGGATGCTGACGAT…
Sentoku et al. 2022, Scientific Reports	LC685959.1	NA	Animalia	Cnidaria	Anthozoa	Scleractinia	Turbinoliidae	Peponocyathus	Peponocyathus orientalis	yes	0	NA	no	NA	NA	GAGAGTTAAAAAGTACGTGAAACCGTTGAAAGGGAAACGAATGGACTCAGCAACGCGCCGTTTGAGATTCAGCCGGTTGGCGGGATCGGCTCGTGATTTGCGGATCCGAATGGACCGCTTTCTCGGGCTCGTTCTTGCCGGCCGTCGCACTTCTCTTGGGCGCACGTCAACGTCGGTTGGGTCCGGGTCTGAAAGGTTCCGGGAAGGTGAGTCCGTGCTTCCCCTCGAGGGTCGCTCGTTCCGTTACAGCCCGGTTCTCTCGCGGCTCGGACTCGACCGAGGCGGTTTGCAGCGCATGCCTCTTTTGGCTAGGGTCCCGTCCCTCCGGCCGGTCGTCGACCGCGGTGGACTGCTTGCAGTGCTCCGCGACTGCTGCCGGTCGTTGGGGTGGTGATCTCG…
Sentoku et al. 2022, Scientific Reports	LC685961.1	NA	Animalia	Cnidaria	Anthozoa	Scleractinia	Turbinoliidae	Peponocyathus	Peponocyathus orientalis	no	NA	NA	no	NA	NA	GAGAGTTAAAAAGTACGTGAAACCGTTGAAAGGGAAACGAATGGACTCAGCAACGCGCCGTTTGAGATTCAGCCGATTGGCGGGATCGGCTCGTGATTTGCGGATCCGAATGGACCGCGTTCTCGGGCTCGTTCTTGCCGGCCGTCGCACTTCTCTTGGGCGCACGTCAACGTCGGTTGGGTCCGGGTCTGAAAGGTTCCGGGAAGGTGAGTCCGTGCTTCCCCTCGAGGGTCGCTCGTTCCGTTACAGCCCGGTTCTCTCGCGGCTCGGACTCGACCGAGGCGGTTTGCAGCGCATGCCTCTTTTGGCTAGGGTCCCGTCCCTCCGGCCGGTCGTCGACCGCGGTGGACTGCTTGCAGTGCTCCGCGACTGCTGCCGGTCGTTGGGGTGGTGATCTCG…
Etebeth 2018, PhD Dissertation	MG583525.1	NA	Animalia	Cnidaria	Anthozoa	Malacalcyonacea	Nephtheidae	Dendronephthya	Dendronephthya sp.	yes	0	NA	no	NA	NA	GAGAGTTAAAGAGTACGTGAAACCGTTGAAAGGGAAGCGAATGGAGTTAGCAATTCGCCCCGCCAGATTCAGTCGCTCGCGCATCGCGACGGTCGCGCTCTCGATCCGCATGGACGAGGCGCGCTCGGACGCGGTGCGCGGACGGCGCACTTCTGGCGAGCGAGCGTCAGCGTCGGTTGTCGACGGGCGATAAGGTCGCAAGGAAGGTGGACCGGCCTCGCGGCTGGTTGTTAAGACTTGCGCTCGCATAGCTCGTCGGCGACCGTGGTCTGCGGCGCGTGCTCGGCTGGCGACCCGACCGATCGGTCCGGCATGTCGACCGTGGCGGACGGCACGCCTGTGCGCTCGAACCGCTGCCTGTCGATCGTGACGGTGTTCGCACACTACGCGCCTAGGATG…
Etebeth 2018, PhD Dissertation	MG583526.1	NA	Animalia	Cnidaria	Anthozoa	Malacalcyonacea	Nephtheidae	Dendronephthya	Dendronephthya sp.	yes	0	NA	no	NA	NA	GAGAGTTAAAAAGTACGTGAAACCGTTGAAAGGGAAGCGAATGGAGTTAGCAATTCGCCCTGCCAGATTCAGTTGCTCGTGCATCGCGACGGTCGCGCTCTCGATCCGCACGGACGAGGCGCGCTCGGACGCGCTGTTCGGACGGCGCACTTCTGACGAGCGAGCGTCAGCGTCGGTTGTCGACGGGCGACAAGGTCGCAAGGAAGGTGAACCGGCTTCGCGGCCGGTTGTTAAGACTTGCGCTCGTATAGCTCGCCGGCGACCGTGGCCTGCTGCGACGCGTGCTTGGCTGGCGACCCGACCGATCGGTCCGGCATGTCGACCGTGGCGGACGGCACGCCTGTGCGCTCGAACCGCTGCCTGCCGATCGTGACGGTGTTCGCACACTACGCGTCTAGG…
Etebeth 2018, PhD Dissertation	MG583527.1	NA	Animalia	Cnidaria	Anthozoa	Malacalcyonacea	Nephtheidae	Dendronephthya	Dendronephthya sp.	yes	0	NA	no	NA	NA	GAGAGTTAAAGAGTACGTGAAACCGTTGAAAGGGAAGCGAATGGAGTTAGCAATTCGCCCCGCCAGATTCAGTCGCTCGCGCATCGCGACGGTCGCGCTCTCGATCCGCATGGACGAGGCGCGCTCGGACGCGGTGCGCGGACGGCGCACTTCTGGCGAGCGAGCGTCAGCGTCGGTTGTCGACGGGCGATAAGGTCGCAAGGAAGGTGGACCGGCCTCGCGGCTGGTTGTTAAGACTTGCGCTCGCATAGCTCGTCGGCGACCGTGGTCTGCGGCGCGTGCTCGGCTGGCGACCCGACCGATCGGTCCGGCATGTCGACCGTGGCGGACGGCACGCCTGTGCGCTCGAACCGCTGCCTGTCGATCGTGACGGTGTTCGCACACTACGCGCCTAGGATG…
Etebeth 2018, PhD Dissertation	MG583529.1	NA	Animalia	Cnidaria	Anthozoa	Malacalcyonacea	Nephtheidae	Stereonephthya	Stereonephthya sp.	yes	0	NA	no	NA	NA	GAGAGTTAAAAAGTACGTGAAACCGTTGAAAGGGAAGCGAATGGAGTTAGCAATTCGCCCCGCCAGATTCAGTCGCTCGCGCTGTGCGACGGCCGCGCTCTCGATCCGCATGGACGAGACGCGTTCGGACGCGCCGTGCGTGCGGCGCACTTCTGGCGAGCGAGCGTCAGCGTCGGTTGTCGTCGGGCGACAAGGTCGCGAGCAAGGTGGACCGGCCCTCGGGCCGGTTGTTACAGACTCGCGTTCGTACAGCTCGGCGGCGACCGTGGCCCCTGCGACGCGTGCTTGGCTGGCGACCCGATCGATCGGTACGGCATGTCGACCGTGGCGGACGGCACGCCTGTGCGCTCGAACTGCTGCCTGCCGATCGTAACGGTGTTCGCACACTACGCGCCTAGG…
Etebeth 2018, PhD Dissertation	MG583530.1	NA	Animalia	Cnidaria	Anthozoa	Malacalcyonacea	Nephtheidae	Stereonephthya	Stereonephthya sp.	yes	0	NA	no	NA	NA	GAGAGTTAAAAAGTACGTGAAACCGTTGAAAGGGAAGCGAATGGAGTTAGCAATTCGCCCCGCCAGATTCAGTCGCTCGCGCTGTGCGACGGCCGCGCTCTCGATCCGCATGGACGAGACGCGTTCGGACGCGCCGTGCGTGCGGCGCACTTCTGGCGAGCGAGCGTCAGCGTCGGTTGTCGTCGGGCGACAAGGTCGCGAGCAAGGTGGACCGGCCCTCGGGCCGGTTGTTACAGACTCGCGTTCGTACAGCTCGGCGGCGACCGTGGCCCCTGCGACGCGTGCTTGGCTGGCGACCCGATCGATCGGTACGGCATGTCGACCGTGGCGGACGGCACGCCTGTGCGCTCGAACTGCTGCCTGCCGATCGTAACGGTGTTCGCACACTACGCGCCTAGG…
Etebeth 2018, PhD Dissertation	MG583531.1	NA	Animalia	Cnidaria	Anthozoa	Malacalcyonacea	Nephtheidae	Dendronephthya	Dendronephthya sp.	yes	0	NA	no	NA	NA	GAGAGTTAAAGAGTACGTGAAACCGTTGAAAGGGAAGCGAATGGAGTTAGCAATTCGCCCCGCCAGATTCAGTCGCTCGCGCATCGCGACGGTCGCGCTCTCGATCCGCAGGGACGAGGCGCGCTCGGACGCGGTGCGCGGACGGCGCACTTCTGGCGAGCGAGCGTCAGCGTCGGTTGTCGACGGGCGATAAGGTCGCAAGGAAGGTGGACCGGCCTCGCGGCTGGTTGTTAAGACTTGCGCTCGCATAGCTCGTCGGCGACCGTGGTCTGCGGCGCGTGCTCGGCTGGCGACCCGACCGATCGGTCCGGCATGTCGACCGTGGCGGACGGCACGCCTGTGCGCTCGAACCGCTGCCTGTCGATCGTGACGGTGTTCGCACACTACGCGCCTAAGATG…
Etebeth 2018, PhD Dissertation	MG583532.1	NA	Animalia	Cnidaria	Anthozoa	Malacalcyonacea	Nephtheidae	Stereonephthya	Stereonephthya sp.	yes	0	NA	no	NA	NA	GAGAGTTAAAAAGTACGTGAAACCGTTGAAAGGGAAGCGAATGGAGTTAGCAATTCGCCCCGCCAGATTCAGTCGCTCGCGCTGTGCGACGGCCGCGCTCTCGATCCGCATGGACGAGACGCGTTCGGACGCGCCGTGCGTGCGGCGCACTTCTGGCGAGCGAGCGTCAGCGTCGGTTGTCGTCGGGCGACAAGGTCGCGAGCAAGGTGGACCGGCCCTCGGGCCGGTTGTTACAGACTCGCGTTCGTACAGCTCGGCGGCGACCGTGGCCCCTGCGACGCGTGCTTGGCTGGCGACCCGATCGATCGGTACGGCATGTCGACCGTGGCGGACGGCACGCCTGTGCGCTCGAACTGCTGCCTGCCGATCGTAACGGTGTTCGCACACTACGCGCCTAGG…
Bryce & Wilson 2019, Invertebrate Systematics	MG717914.1	NA	Animalia	Cnidaria	Anthozoa	Malacalcyonacea	Sarcophytidae	Lobophytum	Lobophytum sarcophytoides	yes	0	NA	no	NA	NA	GAGAGTTAAAAAGTACGTGAAACCGTTGAAAGGGAAGCGAATGGAGTTAGCAATTCGCCCTGCCAGATTCAGTTGCTCGCGCTTCGCGACGAGCGCGCTCTCGATCCGCATGGACGAGACGTGCTCGGGTGCGACGTGTGGACGGCGCACTTCTGGCGGGCGAGCGTCAGCGTCGGTCGTCGACGAGCGATAAGGTCGCAAGCAAGGTAGACGTGCCTTCGGGCGCGTTGTTAATAAGACTCGCGTTCGTATAGCTCGACGGCGACCGTGGCTTCTTCTCGACGACGCGTGCCTGGCTGGCGACTCGCGTGATCGGTCCGGCATGTCGACTACGGCGGACGGCACGCCTGTGCGCTCGAACTGCTGCCGGTCGCTCGCACGATGCTCGCACACAACGCG…
Bryce & Wilson 2019, Invertebrate Systematics	MG717915.1	NA	Animalia	Cnidaria	Anthozoa	Malacalcyonacea	Sarcophytidae	Sclerophytum	Sclerophytum pocilloporaeforme	yes	0	NA	no	NA	NA	GAGAGTTAAAAAGTACGTGAAACCGTTGAAAGGGAAGCGAATGGAGTTAGCAATTCGCCCTGCCAGATTCAGTTGTTCGCGCTTCGCGACGTGCACGCTCTCGATCCGCATGGACGAGACGTGTACGGGTGCGACGTGCGGACGGCGCACTTCTGGCGGGCGAGCGTCAGCGTCGGTCGTCGACGGGCGATAAGGTCGCGAGGAAGGTAGACGTGCCTTCGGGCGCGTTGTTAAGACTCGCGTTCGCATAGCTCGACGACGACCGTGGCTCCTTCACACGGAGGCGACGCGTGCCTGGCTGGCGACTTGTGCGATCGGTCCGGCATGTCGACCGTGGCGGACGGCACGCCTGTGCGCTCGAACTGCTGCCGGTCGCTCGCACGATGTTCGCACACTACG…
Bryce & Wilson 2019, Invertebrate Systematics	MG717916.1	NA	Animalia	Cnidaria	Anthozoa	Malacalcyonacea	Sarcophytidae	Anastromvos	Anastromvos aldersladei	yes	0	NA	no	NA	NA	GAGAGTTAAAAAGTACGTGAAACCGTTGAAAGGGAAGCGAATGGAGTTAGCAATTCGCCCTGCCAGATTCAGTTGCTCGCGCTTCGCGACGAGCGCGCTCTCGATCCGCATGGACGAGACGCGCTCGGGTGCGGCGTGCGTGCGGCGCACTTCTGGCGGGCGAGCGTCAGCGTCGGTCGCCGACGAGCGATAAGGTCGCGAGCAAGGTAGACGTGCCCGCACGGGCGCGTTGTTAAAGACTCGCGTTCGCATAGCTCGACGGCGACCGTGGCTTGTACTCTCGACGACGCGTGCCTGGCTGGCGACTCGCGCGATCGGTCCGGCATGTCGACCGCGGCGGACGGCACGCCTGTGCGCTCGAACCGCTGCCGGTCGCTTTGCGCGATGTTCGCACACAAC…
Bryce & Wilson 2019, Invertebrate Systematics	MG717917.1	NA	Animalia	Cnidaria	Anthozoa	Malacalcyonacea	Sarcophytidae	Anastromvos	Anastromvos aldersladei	yes	0	NA	no	NA	NA	GAGAGTTAAAAAGTACGTGAAACCGTTGAAAGGGAAGCGAATGGAGTTAGCAATTCGCCCTGCCAGATTCAGTTGCTCGCGCTTCGCGACGAGCGCGCTCTCGATCCGCATGGACGAGACGCGCTCGGGTGCGGCGTGCGTGCGGCGCACTTCTGGCGGGCGAGCGTCAGCGTCGGTCGCCGACGAGCGATAAGGTCGCGAGCAAGGTAGACGTGCCCGCACGGGCGCGTTGTTAAAGACTCGCGTTCGCATAGCTCGACGGCGACCGTGGCTTGTACTCTCGACGACGCGTGCCTGGCTGGCGACTCGCGCGATCGGTCCGGCATGTCGACCGCGGCGGACGGCACGCCTGTGCGCTCGAACCGCTGCCGGTCGCTTTGCGCGATGTTCGCACACAAC…
Bryce & Wilson 2019, Invertebrate Systematics	MG717918.1	NA	Animalia	Cnidaria	Anthozoa	Malacalcyonacea	Cladiellidae	Aldersladum	Aldersladum sp.	yes	0	NA	no	NA	NA	GAGAGTTAAAAAGTACGTGAAACCGTTGAAAGGGAAGCGAATGGAGTTAGCAATTCGCCACGCCAGATTCAGCTGTCCGTGCGGTGCGACGTGCGCGCTCTCGATCCGCATGGACGAGACGCTCGCGGGTGCGCCGTGCGAGCCGCGCACTTCTGGCTGGCGAGCGTCAGCGTCGGTTGGCGTCGGGCGACAAGGATGCGAGGAAGGTGAGCCGGTGCTTGCTGCCGGCTGTTAAGCCTCGCGATCGCACGGCCCGACGCCGACCGTGGGACTGCGACGCGTGCCGCCTCTTTACAGGGGTGGCTGGAGACCCGTACCGATCGGTCCGGCATGTCGACCGCGGCGGACGGCACGCCTGTGCGCTCGAACTGCTGCCGGTCGATCGAACGGTGCTCGCAC…
Cairns & Wirshing 2018, BMC Ecology and Evolution	MG980134.1	NA	Animalia	Cnidaria	Anthozoa	Scleralcyonacea	Chrysogorgiidae	Radicipes	Radicipes stonei	yes	0	NA	no	NA	NA	GAGAGTTAAAAAGTGCGTGAAACCGTTGGAAGGGAAGCGAATGGAGACGGCAAATCTCCGAGTTCTCGCGATCTGTACAGACGCGGTTCGCGCGGTCGCAGTACCCGCGCGGTGCACTTCCGGTGGGCTAGCGTCAACGTCGGTCTACGACGCGTCACATAGCCGCGACACGGTAGGTCCTTAGTGTTGCGTGCACTCGTACTAGACCGGTCGCAGCGTGTGCCTGTAGGCTGCTGACTTTGTTGTCGATCCGGCGATGCTGTCCAACGGACGGCTCCGCCTGTGCGTCGGCAGGCCGCCGTTCGACCGACGAAGGATGCAGACACGACGCGCTGAGTACGTTGACCGCCGTGCGGCTCCATCCGACCCGTCTTGAAACACGGACCAAGGAGTCTAAC
Cairns & Wirshing 2018, BMC Ecology and Evolution	MG980135.1	NA	Animalia	Cnidaria	Anthozoa	Scleralcyonacea	Primnoidae	Verticillata	Verticillata castellviae	yes	0	NA	no	NA	NA	GAGAGTTAAAAAGTGCGTGAAACCGTTGGAAGGGAAGCGAATAGAGCTTGCAATTCCGTGCTCGCTTTCGATCTTTCTAGACGAGGCGTGCGCGTATGCGATGCGCGATCGGTGCACTTCCGCTAGGCGAAAGTCAACGTCGGTTTTGGAAAAGTCAAAAAGCAGCGAGCACGGKAGATCTCTAGGCTTKCGTGCAATTTGTTGAGACCGGTCGCAGCACGTACCTGTTGGTTGATGTCTTCGKCGATGAKTTGGTTTTACGTCTCTSGGCGGACGGCTTTGCCTGTGCGTCGGCSTGCGTCCGCTCAAACGACGGTGAAAATACACACAACGTGCTAAGGACGTTGACTATGCGGCGGCTCTATCCRMCCCGTCTTGAAACACGGACCAAGGAGTCYA…
Cairns & Wirshing 2018, BMC Ecology and Evolution	MG980136.1	NA	Animalia	Cnidaria	Anthozoa	Scleralcyonacea	Primnoidae	Calyptrophora	Calyptrophora microdentata	yes	0	NA	no	NA	NA	GAGAGTTAAAAAGTGCGTGAAACCGCTGGAAGGGAAGCGAATGGAGTCGGCAATTCCGTGCTCGCTCTCGATCTTTCGAGACGGGCCCTGTGCGCGCGCGTTACGTGGTCGGTGCACTTCCGGCAGGCGAACGTCAACGTCGGTTTGCCGCCAGTCACAAAGCTGCAAGCACGGTAGGTCTCTAGGCTTGTACGCACTCGATGCAGACTGGGCGCAGCGCGTACCTGCAGGCTGCTGTCTTTATCGTTGAATCGATCGCGCCGCTGGACGGACGGCTTTGCCTGTGCGTCGTGGTGCGGTCCATCAATCGATTGAGCAAACAGACACGACGCGCTGAGGACGTTGATCGCCTAGCGACTCCATCCGACCCGTCTTGAAACACGGACCAAGGAGTCTAAC
Cairns & Wirshing 2018, BMC Ecology and Evolution	MG980137.1	NA	Animalia	Cnidaria	Anthozoa	Scleralcyonacea	Primnoidae	Perissogorgia	Perissogorgia vitrea	yes	0	NA	no	NA	NA	GAGAGTTAAAAAGTGCGTGAAACCGTTGGAAGGGAAGCGAATGGAGTCGGCAATTCCGTGCTTGGCTTCGATCTTCATAGAAGAGCCTCGTACGCTCGCCTTACATGGGCGGTGCACTTCCGCAAGGCTAAAGTCAACGTCGGTTTGTGCGGAGTCTGAAAGCTGCTAGTTCGGTAGATCTTTAGACTTTCGTGCAGTCCGCGCAGATCGGGCGCAGCACGGGCCTAGAGGCTGCTGTCTTTAACGTTGAATCGCTTTCGGTTGGCTGGACGGACGGCTTTGCCTGTGCTTTCCGGCTGTGGCGTTCAAACGGTAAGGCGAACAGACACACCGTGCTGAGGACGTTGACCGTCTCGCGACTCCATCCGACCCGTCTTGAAACACGGACCAAGGAGTCTG…
Cairns & Wirshing 2018, BMC Ecology and Evolution	MG980138.1	NA	Animalia	Cnidaria	Anthozoa	Scleralcyonacea	Primnoidae	Primnoa	Primnoa notialis	yes	2	25, 31	no	NA	NA	GAGAGTTAAAAAGTGCGTGAAACCACTGGARGGGAAGCGAATGGAGTTCGCAATTTCGTGCTCCGCCTCGATCTTTCTAGACGAGCGTTGTGCGGTCGCGTTACGTGGGCGGTGCACTTCCGGACGGCGAAAGTCAACGTCGGTTTGCCGCGAGTTAAAAAGCTGCGAGCACGGTAGGTCCGTAGGCTTGCATGCACTCGCTGCAGACTGGTTGCASCGCGTGCCTGCAGGSTGCKGTYTTTGTCGTTGAATCGGTGTAATGTCRCTGGACGGACGGCTTTGCCTGTGCGTCGGGGTGCGGCCGTTCAAACGACGAGGCAAACAGACACGACGCGCTGAGGACGTTGACCGCCCGGCGACTCCATCCGACCCGTCTTGAAACACGGACCAAGGAGTSTA…
Cairns & Wirshing 2018, BMC Ecology and Evolution	MG980139.1	NA	Animalia	Cnidaria	Anthozoa	Scleralcyonacea	Primnoidae	Primnoa	Primnoa notialis	yes	1	25	no	NA	NA	GAGAGTTAAAAAGTGCGTGAAACCACTGGAAGGGAAGCGAATGGAGTTCGCAATTTCGTGCTCCGCCTCGATCTTTCTAGACGAGCGTTGTGCGGTCGCGTTACGTGGGCGGTGCACTTCCGGACGGCGAAAGTCAACGTCGGTTTGCCGCGAGTTAAAAAGCTGCGAGCACGGTAGGTCCGTAGGCTTGCATGCACTCGCTGCAGACTGGTTGCAGCGCGTGCCTGCAGGCTGCTGTCTTTGTCGTTGAATCGGTGTAATGTCGCTGGACGGACGGCTTTGCCTGTGCGTCGKGGTGCGGCCGTTCAAACGACGAGGCAAACAGACACGACGCGCTGAGGACGTTGACCGCCCGGCGACTCCATCCGACCCGTCTTGAAACACGGACCAAGGAGTCTA…
Cairns & Wirshing 2018, BMC Ecology and Evolution	MG980140.1	NA	Animalia	Cnidaria	Anthozoa	Scleralcyonacea	Primnoidae	Australogorgia	Australogorgia aldersladei	yes	1	25	no	NA	NA	GAGAGTTAAAAAGTGCGTGAAACCACTGGAAGGGAAGCGAATGGAGTTCGCAATTTCGTGCTCCGCCTCGATCTTTCTAGACGAGCGTTGTGCGGTCSCGTTACGTGGGCGGTGCACTTCCGGACGGCGAAAGTCAACGTCGGTTTGCCGCGAGTTAAAAAGCTGCGAGCACGGTAGGTCCGTAGGCTTGCATGCACTCGCTGCAGACTGGTTGCAGCGCGTGCCTGCAGGCTGCTGTCTTTGTCGTTGAATCGGTGTAATGTCRCTGGACGGACGGCTTTGCCTGTGCGTCGTGGTGCGGCCGTTCAAACGACGAGGCAAACAGACACGACGCGCTGAGGACGTTGACCGCCCGGCGACTCCATCCGACCCGTCTTGAAACACGGACCAAGGAGTCTA…
Cairns & Wirshing 2018, BMC Ecology and Evolution	MG980141.1	NA	Animalia	Cnidaria	Anthozoa	Scleralcyonacea	Primnoidae	Parastenella	Parastenella pacifica	yes	2	20, 26	no	NA	NA	TTAAAAAGTGCGTGAAACCACTGGARGGGAAGCGAATGGAGTTCGCAATTCCGTGCTGCGCCTCGATCTTTCTAGACGAGCGTTGTGCGGTCGCGTTACGTGGGCGGTGCACTTCCGGACGGCGAAAGTCAACGTCGGTTTGCCGCGAGTTAAAAAGCTGCGAGCATGGTAGGTCCGTAGGCTTGCAAGCACTCGCGGCAGACTGGTCGCAGCGCGTGCCTGAAGGCTGCTGTCTTTATCGTTGAATCGGCACCATGTCACTGGACGGACGGCTCTGCCTGTGCGTCGGGGTGCTGCCGTTCAAACGACGAGGCAAACAGACACGACGCGCTGAGGACGTTGACCGCCCGGCGACTCCATCCGACCCGTCTTGAAACACGGACCAAGGAGTCTAAC
Cairns & Wirshing 2018, BMC Ecology and Evolution	MG980142.1	NA	Animalia	Cnidaria	Anthozoa	Scleralcyonacea	Primnoidae	Candidella	Candidella helminthophora	yes	1	25	no	NA	NA	GAGAGTTAAAAAGTGCGTGAAACCACTGGAAGGGAAGCGAATGGAGTTCGCAATTCCGTGCTGCGCCTCGATCTTTCTAGACGAGCGTTGTGCGGTCGCGTTACGTGGGCGGTGCACTTCCGGACGGCGAAAGTCAACGTCGGTTTGCCGCGAGTTAAAAAGCTGCGAGCATGGTAGGTCCGTAGGCTTGCAAGCACTCGCGGCAGACTGGTCGCAGCGCGTGCCTGAAGGCTGCTGTCTTTATCGTTGAATCGGCACCATGTCACTGGACGGACGGCTCTGCCTGTGCGTCGGGGTGCTGCCGTTCAAACGACGAGGCAAACAGACACGACGCGCTGAGGACGTTGACCGCCCGGCGACTCCATCCGACCCGTCTTGAAACACGGACCAAGGAGTCTA…
Cairns & Wirshing 2018, BMC Ecology and Evolution	MG980143.1	NA	Animalia	Cnidaria	Anthozoa	Scleralcyonacea	Primnoidae	Abyssoprimnoa	Abyssoprimnoa gemina	yes	0	NA	no	NA	NA	GAGAGTTAAAAAGTGCGTGAAACCGCTGGAAGGGAAGCGAATGGAGTTCGCWATACCGTGCTCTGCCTCGATCTTCTTAGACGAGCCTTGTGCGGTCGCGTGACGTGGGCGGTGCACTTCCGGTCGGCGAAAGTCAACGTCGGTTTGCCGCGAGTTAAAAAGCTGCGAGCACGGTAGGTCCGTAGGCTTGTATGCACTCGCTGCAGACCGGCCGCAGCGCGTACCTGCAGGCTGCTGTCTTTATCGTTGAATCGGTATAATGTCACCGGACGGACGGCTTTGCCTGTGCGTAGGCGTGCGGCCGTTCAAACGATGAGGCAAACAGACACGACGCGCTGAGGACGTTGACCGCCCGGCGACTCCATCCGACCCGTCTTGAAACACGGACCAAGGAGTCTA…
Cairns & Wirshing 2018, BMC Ecology and Evolution	MG980144.1	NA	Animalia	Cnidaria	Anthozoa	Scleralcyonacea	Primnoidae	Metafannyella	Metafannyella ventilabrum	yes	1	29	no	NA	NA	GAGAGTTAAAAAGTACGTGAAACCGTTGCAAGGGAAGCGAATGGAGTTTGCAATTCCGCGCTTGCTTTCGATCTTTCTAGACGAAACCAGCACGCCCGCGTTACGTGACCGGTGCATTTCCGCTTGGCGAAGGTCAGCGTCGGTTTGCGCGGAGCGGGAAAGCCGCAAGCACGGTAGGTCGCTAGGCTTGTGTGCCATTCACGTCGACCGGCTGCAGCACGAACCTGCTGGTTGATGTCCTCGTTTTTACGTCGGTTTGACGTTGCCGGATGGACGGCTTTGCCTGTGCGTCCGTGCGCGTCCTTTCGAACGAGTGAGAAAACAGACACGACGTGCTGAAGACGCTGACTTCTCGTCGGCTCTATCCGACCCGTCTTGAAACACGGACCAAGGAGTCTA…
Cairns & Wirshing 2018, BMC Ecology and Evolution	MG980145.1	NA	Animalia	Cnidaria	Anthozoa	Scleralcyonacea	Primnoidae	Fannyella	Fannyella rossii	yes	0	NA	no	NA	NA	GAGAGTTAAAAAGTGCGTGAAACCGTTGGAAGGGAAGCGAATAGAGGTTGCAATTCCGCGCTTGCTTTCGATCTTTCGAGACGATGCTTGCACGCCTGCGATCCGCGTCCGGTGCACTTCCGCTGGGCGACAGTCAACGTCGGTTTGCGCGGAGTTAGAAAGCTGCGAGCACGGTAGATCTCTAGGCTTGCGTGCACTTCGGTCAGACCGGTCGCAGCACGTACCTGCAGGTTGACGTCTTCGTAGTCGAGACGGTTTAACGTCGCCTGGCGGACGGCTTTGCCTGTGCGTCGGCGTGCGGCCGCTCGAACGACGGGGAATGCGTACACCACGTGCTGAGGACGTTGACTYCACGGCGCCTCTATACGACCCGTCTTGAAACACGGACCAAGGAGTCTA…
Cairns & Wirshing 2018, BMC Ecology and Evolution	MG980146.1	NA	Animalia	Cnidaria	Anthozoa	Scleralcyonacea	Primnoidae	Callozostron	Callozostron mirabile	yes	0	NA	no	NA	NA	GAGAGTTAAAAAGTACGTGAAACCGTTGGAAGGGAAGCGAATAGAGATAGCAATTCCGTGCTTGGTTTCGATCTTTCTAGACGAGCCTTGCACGTTTGCATTGCGTGAACGGCGCACTTCCGCTTGGCGAAAGTCAACGTCGGTTTGCGCGATATCAAAAAGCCGCAAGCACGGTAGGTCTCAAGGCTTGCGTGCAATTCGCGTGGACCGGTCGCAGCACGTACCTGCAGGTTGCTGTCTTCGTCGTTGAGTCGGTTTAACGTCGCTAGACGGACGGCTTTGCCTGTGCGTCTGCGTGCGGCCGCTCCGACGATGGGCAAACAGACACGACGTGCTGAGGACGTTGGCAATTCTGCGGCTCTATCCGACCCGTCTTGAAACACGGACCAAGGAGTCTAAC
Cairns & Wirshing 2018, BMC Ecology and Evolution	MG980147.1	NA	Animalia	Cnidaria	Anthozoa	Scleralcyonacea	Primnoidae	Callozostron	Callozostron pinnatum	yes	1	18	no	NA	NA	GAGAGTTAAAAAGTACGCGAAACCGTTGGAAGGGAAGCGAATRGAGSTAGCAATTCCGTASTCGGTTTCGWTCTTTSCAGASGAKCCTTGGASGTTTGSGTTACTTSAACGGCGCACTTCCGCTTGGSGAAAKTCAAAGTCGGTTCCCGTGGTGGCATARAGCAGCAAGCACGGTAGKTCTCARGGCTTGCGTGCAAGTCATTTGGACCGGTCSCAGTACGTACCTGAAGGTTGAKGTCTTSSTCGTTGGGTGTGTTTAACGTCSCKGGACGGACGGCTTKSCCTGTGCGTCTGTGCGAGGCCGCTCAGACGACGGGGCAAACAGACMCSACGTGCTGAGGACGTTGGCAACTCTGCGGCTCTATCCGACCCGTCTTGAAACACGGACCAAGGAGTCTA…
Cairns & Wirshing 2018, BMC Ecology and Evolution	MG980148.1	NA	Animalia	Cnidaria	Anthozoa	Scleralcyonacea	Primnoidae	Armadillogorgia	Armadillogorgia cyathella	yes	0	NA	no	NA	NA	GAGAGTTAAAAAGTGCGTGAAACCGTTGGAAGGGAAGCGAATAGAGCTTGCAATTCCGTGCTCGCTTTCGATCTTTCTAGACGAGGCGTGCGCGTATGCGATGCGCGATCGGTGCACTTCCGCTAGGCGAAAGTCAACGTCGGTTTTGGAAAAGTCAAAAAGCAGCGAGCACGGKAGATCTCTAGGCTTGCGTGCAATTTGTTGAGACCGGTCGCAGCACGTACCTGTTGGTTGATGTCTTCGTCGATGAGTTGGTTTTACGTCTCTSGGCGGACGGCTTTGCCTGTGCGTCGGCGTGCGTCCGCTCAAACGACGGTGAAAATACACACAACGTGCTAAGGACGTTGACTATGCGGCGGCTCTATCCRMCCCGTCTTGAAACACGGACCAAGGAGTCYA…
Cairns & Wirshing 2018, BMC Ecology and Evolution	MG980149.1	NA	Animalia	Cnidaria	Anthozoa	Scleralcyonacea	Primnoidae	Convexella	Convexella magelhaenica	yes	0	NA	no	NA	NA	GAGAGTTAAAAAGTGCGTGAAACCGTTGGAAGGGAAGCGAATAGAGCTTGCAATTCCGTGCTCGCTTTCGATCTTTCTAGACGAGGCGTGCGCGTATGCGATGCGCGATCGGTGCACTTCCGCTAGGCGAAAGTCAACGTCGGTTTTGGAAAAGTCAAAAAGCAGCGAGCACGGKAGATCTCTAGGCTTGCGTGCAATTTGTTGAGACCGGTCGCAGCACGTACCTGTTGGTTGATGTCTTCGKCGATGAKTTGGTTTTACGTCTCTSGGCGGACGGCTTTGCCTGTGCGTCSGCSTGCGTCCGCTCAAACGACGGTGAAAATACACACAACGTGCTAAGGACGTTGACTATGCGGCGGCTCTATCCRMCCCGTCTTGAAACACGGACCAAGGAGTCYA…
Cairns & Wirshing 2018, BMC Ecology and Evolution	MG980150.1	NA	Animalia	Cnidaria	Anthozoa	Scleralcyonacea	Primnoidae	Convexella	Convexella magelhaenica	yes	0	NA	no	NA	NA	GAGAGTTAAAAAGTGCGTGAAACCGTTGGAAGGGAAGCGAATAGAGCTTGCAATTCCGTGCTCGCTTTCGATCTTTCTAGACGAGGCGTGCGCGTATGCGATGCGCGATCGGTGCACTTCCGCTAGGCGAAAGTCAACGTCGGTTTTGGAAAAGTCAAAAAGCAGCGGGCACGGTAGATCTCTAGGCTTGCGTGCAATTTGTTGAGACCGGTCGCAGCACGTACCTGTTGGTTGATGTCTTCGTCGATGAGTTGGTTTTACGTCTCTBGGCGGACGGCTTTGCCTGTGCGTCGGCGTGCGTCCGCTCAAACGACGGTGAAAATACACACAACGTGCTAAGGACGTTGACTATGCGGCGGCTCTATCCRMCCCGTCTTGAAACACGGACCAAGGAGTCTA…
Cairns & Wirshing 2018, BMC Ecology and Evolution	MG980151.1	NA	Animalia	Cnidaria	Anthozoa	Scleralcyonacea	Primnoidae	Plumarella	Plumarella pourtalesii	yes	0	NA	no	NA	NA	GAGAGTTAAAAAGTGCGTGAAACCGTTGGAAGGGAAGCGAATAGAGCTTGCAATTCCGTGCTCGCTTTCGATCTTTCTAGACGAGGCGTGCGCGTATGCGATGCGCGATCGGTGCACTTCCGCTAGGCGAAAGTCAACGTCGGTTTTGGAAAAGTCAAAAAGCAGCGAGCACGGTAGATCTCTAGGCTTGCGTGCAATTTGTTGAGACCGGTCGCAGCACGTACCTGTTGGTTGATGTCTTCGTCGATGAGTTGGTTTTACGTCTCTCGGCGGACGGCTTTGCCTGTGCGTCGGCGTGCGTCCGCTCAAACGACGGTGAAAATACACACAACGTGCTAAGGACGTTGACTATGCGGCGGCTCTATCCGACCCGTCTTGAAACACGGACCAAGGAGTCTA…
Cairns & Wirshing 2018, BMC Ecology and Evolution	MG980152.1	NA	Animalia	Cnidaria	Anthozoa	Scleralcyonacea	Primnoidae	Arntzia	Arntzia gracilis	yes	0	NA	no	NA	NA	GAGAGTTAAAAAGTGCGTGAAACCGTTGGAAGGGAAGCGAATAGAGTTTGCAATTCCGCGCTTGCTGTCGATCTTTTCAGACGACGCTTGCACGCTTGCGATGCGAGATCGGTGCACTTCCGCCTGGCGAAAGTCAACGTCGGTTTGCGCGGAGTTAGAAAGCTGCGAGCATGGTAGATCTCTAGGCTTGCGTGCAATTCGTGCAGACCGGTCGCAGCACGTACCTGCTGGTTGATGTCTTCGTCTTTGAGACGGTTTACCGTCGCTTGGCGGACGGCTTTGCCTGTGCGTCGGCGTGCGGCCGCTCAAACGACGGGGGACGCATACACCACGTGCTAAGGACGTTGACTCCTCGGCGGCTCTATACGACCCGTCTTGAAACACGGACCAAGGAGTCTA…
Cairns & Wirshing 2018, BMC Ecology and Evolution	MG980153.1	NA	Animalia	Cnidaria	Anthozoa	Scleralcyonacea	Primnoidae	Primnoella	Primnoella insularis	yes	0	NA	no	NA	NA	GAGAGTTAAAAAGTGCGTGAAACCGTTGGAAGGGAAGCGAATRGAGCTTGCAAGTCCGTGCCTGCTCTCGATCTTCCTAGACGAGGCTTGCGCGCATGCGTTGCGCGAACGGTGCACTTCCGCTTGGCGAAAGTCAACGTCGGTTTGCGCGGAGTTAGAAAGCTGCGAGCACGGTAGATCCCTGGGCTTGCGTGCACTTCGTTCGGACCGGTCGCAGCACGTACCTGCTGGTTGACGTCTTCGTCTTTGATGCGGTTTTCCGTCGCCTGGCGGACGGCTTCGCCTGTGCGCCTGCGTGCGGCCGCTCAAACGACGGAGGAAACGGACACCACGTGCTAAGGACGCTGACTGCCCGGCGCCTCTATCCGACCCGTCTTGAAACACGGACCAAGGAGTCTA…
Cairns & Wirshing 2018, BMC Ecology and Evolution	MG980154.1	NA	Animalia	Cnidaria	Anthozoa	Scleralcyonacea	Primnoidae	Calyptrophora	Calyptrophora inornata	yes	0	NA	no	NA	NA	GAGAGTTAAAAAGTGCGTGAAACCGCTGGAAGGGAAGCGAATGGAGTCGGCAATTCCGTGCTCGCTCTCGATCTTTCGAGACGGGCCYTGTGCGCGCGCGTTACGTGGTCGGTGCACTTCCGGCAGGCGAACGTCAACGTCGGTTTGCCGCCAGTCACAAAGCTGCAAGCACGGTAGGTCTCTAGGCTTGTACGCACTCGATGCAGACTGGGCGCAGCGCGTACCTGCAGGCTGCTGTCTTTATCGTTGAATGGGTCGCGCYGCTGGACGGACGGCTTTGCCTGTGCGTCGTGGTGCGGCCCATCAATCGAYTGAGCAAACAGACACGACGCGCTGAGGACGTTGATCGCCTAGCGACTCCMTCCGACCCGTCTTGAAACACGGACCAAGGAGTCTAAC
Cairns & Wirshing 2018, BMC Ecology and Evolution	MG980155.1	NA	Animalia	Cnidaria	Anthozoa	Scleralcyonacea	Primnoidae	Calyptrophora	Calyptrophora wyvillei	yes	0	NA	no	NA	NA	GAGAGTTAAAAAGTGCGTGAAACCGCTGGAAGGGAAGCGAATGGAGTCGCCAATTCCGTGCTCGCTCTCGATCTTTCGAGACGGGCCTTGTGCGCGCGCGTTACGTGGTCGGTGCACTTCCGGCAGGCGAACGTCAACGTCGGTTTGCCGCCAGTCACAAAGCTGCAAGCACGGTAGGTCTCTAGGYTTGTACGCACTCGATGCAGACTGGACGCAGCGCGTACCTGCAGGCTGCTCTCTTTATCGTTGAATCGGTCGCGCCGCTGGACGGACGGCTTTGCCTGTGCGTCGTGGTGCGGCCCATCMATCGATTGAGCAAACAGACACGACGCGCTGAGGACGTTGATCGCCCAGCGACTCCMTCCGACCCGTCTTGAAACACGGACCAAGGAGTCTAAC
Cairns & Wirshing 2018, BMC Ecology and Evolution	MG980156.1	NA	Animalia	Cnidaria	Anthozoa	Scleralcyonacea	Primnoidae	Narella	Narella macrocalyx	yes	0	NA	no	NA	NA	GAGAGTTAAAAAGTGCGTGAAACCGCTGGAAGGGAAGCGAATGGAGTCCGCAACACCGTACTCTGCCTCGATCTTTCTAGACGAGCCCTGTGCGATCGCGTGACGTGGGCGGTGCACTTCCGGCCGGCGAAAGTCAACGTCGGTTTGCCGCGAGTTAAAAAGCTGCGAGCACGGTAGGTCCGTAGGCTTGTACGCACTCGCTGCAGACCGGCCGCAGCGCGTACCTGMAGGCTGCTGTCTTCATCGTTGAATCGGTATGATGTCACTGGACGGACGGCTTTGCCTGTGCGTCGGCGTGCTGCCGTTCAAACGATGAGGCAAACAGACACGACGCGCTGAGGACGTTGACCGCCCGGCGACTCCATCCGACCCGTCTTGAAACACGGACCAAGGAGTCTA…
Cairns & Wirshing 2018, BMC Ecology and Evolution	MG980157.1	NA	Animalia	Cnidaria	Anthozoa	Scleralcyonacea	Primnoidae	Pachyprimnoa	Pachyprimnoa asakoae	yes	3	30, 377, 376	no	NA	NA	GAGAGTTAAAAAGTGCGTGAAACCGTTGGCAGGGAAGCGAATGGAGTTAGCAAATCCGTGCTTGGCTTCGATCTTTATRGACGAGCCTCGTACGATCGCGTTACGTGGGCAGTGCACTTCCGGTTGGCGAAAGTCAACGTCGGTTCGCGCGGAGTCCAAAAGCTGCGAGTTCGGTAGATCCCTAGGCTTGCGTGCAATCCGTGCAGACCGGGCGCASCACGTGCCTGCAGGCTGCTGTCTTTATCGTTGAATCGKTTTCASATCGCCGGGCGGACGGTTTTTCCTGTGCGTCCTGGTGCGGGCATTCAAACGGTATSGCAAGCAGACACGACSTGYTGAKGACGTTGACCGTCTCGCGGCTCCATCCGACCCGTCYYGAAACACGGACCAAGGAGTCTA…
Cairns & Wirshing 2018, BMC Ecology and Evolution	MG980158.1	NA	Animalia	Cnidaria	Anthozoa	Scleralcyonacea	Primnoidae	Aglaoprimnoa	Aglaoprimnoa stefanii	yes	0	NA	no	NA	NA	GAGAGTTAAAAAGTACGTGAAACCGTTGGAAGGGAAGCGAATAGAGTTTGCCATTCCGCGCTTGCTTTCGATCTTTCTAGACGAAACTTGCACGCCCGCGTTACGTGACCGGTGCATTTCCGCTTGGCGAAAGTCAGCGTCGGTTTGCGAGGAGCGAAAATGCCGCAAGCACGGTRGGTCTCTATGCTTGTGTGCAATTCACGCAGACCGACCGCAGCACGAACCTGCTGGTTGATGTCCTCGTTTTTACGTTGGTTTGACGTCGCCGGACGGACGGCTTTGCCTGTGCGTCCGTGCGCGCCCCTTCGAACGAATGAGAAAACAGACACGACGTGCTGAAGACGCTGGCTTCTGGCCGGCTCTATCCGACCCGTCTTGAAACACGGACCAAGGAGTCTA…
Cairns & Wirshing 2018, BMC Ecology and Evolution	MG980159.1	NA	Animalia	Cnidaria	Anthozoa	Scleralcyonacea	Primnoidae	Onogorgia	Onogorgia nodosa	yes	0	NA	no	NA	NA	GAGAGTTAAAAAGTGCGTGAAACCGTTGGAAGGGAAGCGAATRGAGTGTGCAATTRCGCGCTMGCCKTCGATCTTTCGAGACGATGCTTGCGCGCTTGCGATACGCGTCCGGTGCACTTCCGCTGGGCGATAGTCAACGTCGGTTTGCGCGGAGTTAGAAAGCCGCGAGCACGATAGATCTCTAGGCTTGCGTGCACTTCGGTCAGACCGGTCGCAGCACGTACCTGCAGGTTGACGCCTTCGTGGTCGACACGGTTTAACGTCGCCTGGCGGACGGCTTTGCCTGTGCGTCGGCGTGCGGCCGCTCGAACGGCGGGGAGTGCGTACACCACGTGCTGAGGACGTTGACTCCACGGCGCCTCTATACGACCCGTCTTGAAACACGGACCAAGGAGTCTA…
Cairns & Wirshing 2018, BMC Ecology and Evolution	MG980160.1	NA	Animalia	Cnidaria	Anthozoa	Scleralcyonacea	Primnoidae	Plumarella	Plumarella laxiramosa	yes	1	18	no	NA	NA	GAGAGTTAAAAAGTACGCGAAACCGTTGGAAGGGAAGCGAATAGAGCTGACAATTCCGTACTTGGTTTCGATCTTTCTAGACGAACCTTGGACGTTTGCGTTGCCTGAACGGCGCACTTCCGCTTGGCGAAAGTCAACGTCGGTTTGCGTGGTGTCAAAAAGCAGTAAGCACGGTAGGTCTCAAGGTTTGCGTGCAATTCATGCAGACCGGTAGCAGTACGTACCTGCAGGTTGATGTCTTCGTCGTTGAGTCGGTTTAACGTCGCTGGATGGACGGCATTGCCTGTGCGTCTGCGTGCGGCCGCTCAGACGATGGGGAAAACAGACACGACGTGCTGAGGACGTTGGCAATTCCGTGACTCTATCCGACCCGTCTTGAAACACGGACCAAGGAGTCTA…
Cairns & Wirshing 2018, BMC Ecology and Evolution	MG980161.1	NA	Animalia	Cnidaria	Anthozoa	Scleralcyonacea	Primnoidae	Primnoa	Primnoa pacifica	yes	1	25	no	NA	NA	GAGAGTTAAAAAGTGCGTGAAACCACTGGAAGGGAAGCGAATGGAGTTCGCAATTTCGTGCTCCGCCTCGATCTTTCTAGACGAGCGTTGTGCGGTCGCGTTACGTGGGCGGTGCACTTCCGGACGGCGAAAGTCAACGTCGGTTTGCCGCGAGTTAAAAAGCTGCGAGCACGGTAGGTCCGTAGGCTTGCATGCACTCGCTGCAGACTGGTTGCAGCGCGTGCCTGCAGGCTGCTGTCTTTGTCGTTGAATCGGTGTAATGTCRCTGGACGGACGGCTTTGCCTGTGCGTCGGGGTGCGGCCGTTCAAACGACGAGGCAAACAGACACGACGCGCTGAGGACGTTGACCGCCCGGCGACTCCATCCGACCCGTCTTGAAACACGGACCAAGGAGTCTA…
Cairns & Wirshing 2018, BMC Ecology and Evolution	MG980162.1	NA	Animalia	Cnidaria	Anthozoa	Scleralcyonacea	Primnoidae	Primnoa	Primnoa pacifica	yes	1	25	no	NA	NA	GAGAGTTAAAAAGTGCGTGAAACCACTGGAAGGGAAGCGAATGGAGTTCGCAATTTCGTGCTCCGCCTCGATCTTTCTAGACGAGCGTTGTGCGGTCGCGTTACGTGGGCGGTGCACTTCCGGACGGCGAAAGTCAACGTCGGTTTGCCGCGAGTTAAAAAGCTGCGAGCACGGTAGGTCCGTAGGCTTGCATGCACTCGCTGCAGACTGGTTGCAGCGCGTGCCTGCAGGCTGCTGTCTTTGTCGTTGAATCGGTGTAATGTCGCTGGACGGACGGCTTTGCCTGTGCGTCGGGGTGCGGCCGTTCAAACGACGAGGCAAACAGACACGACGCGCTGAGGACGTTGACCGCCCGGCGACTCCATCCGACCCGTCTTGAAACACGGACCAAGGAGTCTA…
Cairns & Wirshing 2018, BMC Ecology and Evolution	MG980163.1	NA	Animalia	Cnidaria	Anthozoa	Scleralcyonacea	Primnoidae	Calyptrophora	Calyptrophora wyvillei	yes	0	NA	no	NA	NA	GAGAGTTAAAAAGTGCGTGAAACCGCTGGAAGGGAAGCGAATGGAGTCGGCAATTCCGTGCTCGCTCTCGATCTTTCGAGACGGGCCCTGTGCGCGCGCGTTACGTGGTCGGTGCACTTCCGGCAGGCGAACGTCAACGTCGGTTTGCCGCCAGTCACAAAGCTGCAAGCACGGTAGGTCTCTAGGCTTGTACGCACTCGATGCAGACTGGGCGCAGCGCGTACCTGCAGGCTGCTGTCTTTATCGTTGAATSGATCGCGCCGCTGGACGGACGGCTTTGCCTGTGCGTCGTGGTGCGGCCCATCAATCGATTGAGCAAACAGACACGACGCGCTGAGGACGTTGATCGCCTAGCGACTCCATCCGACCCGTCTTGAAACACGGACCAAGGAGTCTAAC
Cairns & Wirshing 2018, BMC Ecology and Evolution	MG980164.1	NA	Animalia	Cnidaria	Anthozoa	Scleralcyonacea	Primnoidae	Fannyella	Fannyella spinosa	yes	0	NA	no	NA	NA	GAGAGTTAAAAAGTGCGTGAAACCGTTGGAAGGGAAGCGAATAGAGGTTGCAATTTCGCGCTTGCTTTCGATCTTTCGAGACGATGCTTGCACGCCTGCGATCCGCGTCCGGTGCACTTCCGCTGGGCGACAGTCAACGTCGGTTTGCTCGGAGTTAGAAAGCTGCGAGCACGGTAGATCTCTAGGCTTGCGTGCACTTCGGTCAGACCGGTCGCAGCACGTACCTGCAGGTTGACGTCTTSGTAGTCGAGACGGTTTAACGTCGCCTGGCGGASGGCTTYGCCTGTGCGTCGGCGTGCGGCCGCTCGAACGACGGGRAATGCGTACACCACGTGCTGAGGACGTTGACTCCACGGCGCCTCTATACGMCCCGTCTTGAAACACGGACCAAGGAGTCTA…
Cairns & Wirshing 2018, BMC Ecology and Evolution	MG980165.1	NA	Animalia	Cnidaria	Anthozoa	Scleralcyonacea	Primnoidae	Pyrogorgia	Pyrogorgia lemnos	yes	1	25	no	NA	NA	GAGAGTTAAAAAGTGCGTGAAACCACTGGAAGGGAAGCGAATGGAGTTCGCAATTTCGTGCTCCGCCTCGATCTTTCTAGACGAGCGTTGTGCGGTCGCGTTACGTGGGCGGTGCACTTCCGGACGGCGAAAGTCAACGTCGGTTTGCCGCGAGTTAAAAAGCTGCGAGCACGGTAGGTCCGTAGGCTTGCATGCACTCGCTGCAGACTGGTTGCAGCGCGTGCCTGCAGGCTGCTGTCTTTGTCGTTGAATCGGTGTAATGTCGCTGGACGGACGGCTTTGCCTGTGCGTCGGGGTGCGGCCGTTCAAACGACGAGGCAAACAGACACGACGCGCTGAGGACGTTGACCGCCCGGCGACTCCATCCGACCCGTCTTGAAACACGGACCAAGGAGTCTA…
Cairns & Wirshing 2018, BMC Ecology and Evolution	MG980166.1	NA	Animalia	Cnidaria	Anthozoa	Scleralcyonacea	Primnoidae	Metafannyella	Metafannyella polita	yes	1	29	no	NA	NA	GAGAGTTAAAAAGTACGTGAAACCGTTGCAAGGGAAGCGAATGGAGTTTGCAATTCCGCGCTTGCTTTCGATCTTTCTAGACGAAACCAGCACGCACGCGTTACGTGACCGGTGCATTTCCGCTTGGCGAAGGTCAGCGTCGGTTTGCGCGGAGCGGAAAAGCCGCAAGCACGGTAGGTCGCTAGGCTTGTGTGCCATTCACGTCGACCGGCTGCAGCACGAACCTGCTGGATGATGTCCTCGTTTTTACGTCGGATGGACGGCTTTGCCTGTGCGTCCGTGCGCGTCCTTTCGAACGAATGAGAAAACAGACACGACGTGCTGAAGACGCTGACTTCTCGTCGGCTCTATCCGACCCGTCTTGAAACACGGACCAAGGAGTCTAAC
Cairns & Wirshing 2018, BMC Ecology and Evolution	MG980167.1	NA	Animalia	Cnidaria	Anthozoa	Scleralcyonacea	Primnoidae	Paranarella	Paranarella watlingi	yes	0	NA	no	NA	NA	GAGAGTTAAAAAGTGCGTGAAACCGCTGGAAGGGAAGCGAATGGAGTCGCCAATTCCGTGCTCGCTCTCGATCTTTCGAGACGGGCCTTGTGCGCGCGCGTTACGTGGTCGGTGCACTTCCGGCAGGCGAACCTCAASSTCGGTTTGCCGCCAGTCACAAAGYTGCAAGCACGGTAGSTCTYTAGGMTTGTACGCACTCGAWGCAGAMKGGACSCAGCGCGTACCTGCAGGCTGCTCTCTTTATCGTTGAATCGGTCGCGCCGCTGGAYGGACGGCTTTGCCTGTGCGTCGTGGTGCGACCCATCMATCGATTGAGCAAACAGACACGACGCGCTGAGGACGTTGATCGCCCAGCGACTCCATCCGACCCGTCTTGAAACACGGACCAAGGAGTCTAAC
Lau et al. 2018, Zookeys	MH844383.1	NA	Animalia	Cnidaria	Anthozoa	Malacalcyonacea	Arulidae	Hanah	Hanah hanagasa	yes	1	445	no	NA	NA	GAGAGTTAAAAAGTACGTGAAACCGTTGAAAGGGAAGCGAATGGAGTTAGCAATTCGCCGGTCAGATTCAGCCGCTCGTGTGCCGCGACGTGCGCGCTCTCGATCCGCACGGACGAGACGTGCGCGGGTGCGGCGTTCGGACTGCGCACTTCTGGCCGGCGAGCGTCAGCGTCGGTTGTCGTCGAGCGAAAAGGTCGCGGGAAAGGTAGACGGGCCGTTCGCGGCCCGTTGTTAAGCCCCGCGCTCGCACGGCTCGACGGCGACCGAGGTCATCCTATTCTYCWGGCGACGCGTGCTCACSCTGGCGACCCRTTCGATCGGTCCGACACGTCGATCGTGGCGGACGGCACGCCTGTGCGCTCAAACTGCTGCCGGTCGATCGTGCGGKGTTYGTACACT…
Lau et al. 2018, Zookeys	MH844384.1	NA	Animalia	Cnidaria	Anthozoa	Malacalcyonacea	Arulidae	Hanah	Hanah hanagasa	yes	0	NA	no	NA	NA	GAGAGTTAAAAAGTACGTGAAACCGTTGAAAGGGAAGCGAATGGAGTTAGCAATTCGCCGGTCAGATTCAGCCGCTCGTGTGCCGCGACGTGCGCGCTCTCGATCCGCACGGACGAGACGTGCGCGGGTGCGGCGTTCGGACTGCGCACTTCTGGCCGGCGAGCGTCAGCGTCGGTTGTCGTCGAGCGAAAAGGTCGCGGGAAAGGTAGACGGGCCGTTCGCGGCCCGTTGTTAAGCCCCGCGCTCGCACGGCTCGACGGCGACCGASGTCATCCTATTYTYSTGGCGACGCGTGCTCMCGCTGGCGACCCRTTCGATCGGTCCGACACGTCGATCGTGGCGGACGGCACGCCTGYGCGCTCAARCTGCTGCCGGTCGATCGTGCGGKGTTYGTWCACT…
Lau et al. 2018, Zookeys	MH844385.1	NA	Animalia	Cnidaria	Anthozoa	Malacalcyonacea	Arulidae	Hanah	Hanah hanataba	yes	0	NA	no	NA	NA	GAGAGTTAAAAAGTACGTGAAACCGTTGAAAGGGAAGCGAATGGAGTTAGCAATTCGCCGGTCAGATTCAGCCGCTCGTGTGCCGCGACGTGCGCGCTCTCGATCCGCACGGACGAGGCGTGCGCGGGTGCGGCGTTCGGACGGCGCACTTCTGGCCGGCGAGCGTCAGCGTCGGTTGTCGCCGGGCGAAAAGGTCGCGGGGAAGGTAGACGGGTCGTTCGCGGCCCGTTGTTAAGCCCCGCGCTCGTACGGCTCGACGGCGACCGAGGTCATCTTCTCGKGGCGACGCGTGCTCACGCTGGCGACCTGTTCGATCGGTCCGACACGTCGACCGTGGCGGACGGCACGCCTGTGCGCTCAAACTGCTGCCGGTCGATCGAGCGGTGTTCGTACACTACG…
Lau et al. 2018, Zookeys	MH844387.1	NA	Animalia	Cnidaria	Anthozoa	Malacalcyonacea	Arulidae	Hanah	Hanah hanataba	yes	0	NA	no	NA	NA	GAGAGTTAAAAAGTACGTGAAACCGTTGAAAGGGAAGCGAATGGAGTTAGCAATTCGCCGGTCAGATTCAGCCGCTCGTGTGCCGCGACGTGCGCGCTCTCGATCCGCACGGACGAGACGTGCGCGGGTGCGGCGTTCGGACGGCGCACTTCTGGCCGGCGAGCGTCAGCGTCGGTTGTCGCCGGGCGAAAAGGTCGCGGGGAAGGTAGACGGGACGTTCGCGGCCCGTTGTTAAGCCCTGCGCTCGTACGGCTCGACGGCGACCGAGGTCATCTTCTCGTGGCGACGCGTGCTCACGCTGGCGACCTGTTCGATCGGTCCGACACGTCGACCGTGGCGGACGGCACGCCTGTGCGCTCAAACTGCTGCCGGTCGATCGAGCGGTGTTCGTACACTACG…
Nunez-Flores et al. 2021, Invertebrate Systematics, 2021	MN921244.1	NA	Animalia	Cnidaria	Anthozoa	Scleralcyonacea	Primnoidae	Thouarella	Thouarella islai	yes	0	NA	no	NA	NA	GAGAGTTAAAAAGTACGTGAAACCGTTGAAAGGGAAGCGAATAGAGATAGAAATTCCCCTGGCCGGATTCAGCCGATCCAGCATCGCCGCGTGCTTGGTTTCGATCTTTACAGACGAGCCTTGTACGCTTGCGTTGCGTGACCGGTGCACTTCCGCTTGGCGAATGTCAACGTCGGTTTGCGTGGCGTCAAAAAGCCGCATGCACGGTAGGWCTCACGGGATTGGTAAGGCATGCGTGCAAACAACTCCATGTAGACCGAGTTCTGTCGCAGCACGTACCTCTCCTCGCGGAGAAGGTTGATGTCCTTATGTCGGTTTACCGTCGCTTGGCGGACGGCTTTGCCTGTGCGTCAAGTGCGGCCGTTCAGACGATGGGYAAAATACATACAAGACGTGCTG…
Nunez-Flores et al. 2021, Invertebrate Systematics, 2021	MN921245.1	NA	Animalia	Cnidaria	Anthozoa	Scleralcyonacea	Primnoidae	Thouarella	Thouarella polarsterni	yes	0	NA	no	NA	NA	GAGAGTTAAAAAGTACGTGAAACCGTTGAAAGGGAAGCGAATAGAGATAGTAATTCCCCTGGCCGGATTCAGCCGCTCCAGCATCGCAACGTGCTTGGTTTCGATCTTTACAGACGAGCCTAGTACGCAYGCGTTGCGTGACCGGTGCACTTCCGCTTGGTGAATGTCAACGCCGGTTTGCGTGGCGTCAAAAAGCCGCATGCACGGTAGGTCTCACGGGATCGGTAAGGCTTGCGTGCAAACGACTCCTTGTAGACCGAGTTCTGTCGCAGCACGTACCTCTCCTCGCGGAGAAGGTTGATGTCTTCATCGTTATGTCGGTTTACCGTCGCTCGGCGGACGGCTTTGCCTGTGCGTCAAGTGCGGCCGTTCAGACGATGGGCAAAATACATACACGAC…
Nunez-Flores et al. 2021, Invertebrate Systematics, 2021	MN921246.1	NA	Animalia	Cnidaria	Anthozoa	Scleralcyonacea	Primnoidae	Thouarella	Thouarella weddellensis	yes	1	22	no	NA	NA	AAAAAGTACGTGAAACCGTTGTAAGGGAAGCGAATAGAGATAGAAATTCCTCTGGCCGGATTCAGCCGCTCCAGCATCGCGGCGTGCTTGGTTTCGATCTTTATAAGACGAGCCTTGTGCGCATGCGTTGCGTGACCGGTGCACTTCCGCTTGGGCGAATGTCAACGTCGGTTTGCGTGGCGTCAAAAAGCCGCATGCACGGTAGGTCTCACGGGATCGGTAAGGCTTGCGTGCAAACGACTCCATGTAGACCGAGTTCTGTCGCAGCACGTACCTCTCCTCGCGGAGAAGGTTGATGTCCTCGTCGCTATGTCGGTTTACCGTCGCTTGGCGGACGGCTTTGCCTGTGCGCTTAAGTGCGGCCGTTTAGACGATGGGGAAAATACATACACGACGTGC…
Nunez-Flores et al. 2021, Invertebrate Systematics, 2021	MN921248.1	NA	Animalia	Cnidaria	Anthozoa	Scleralcyonacea	Primnoidae	Thouarella	Thouarella weddellensis	yes	1	29	no	NA	NA	GAGAGTTAAAAAGTACGTGAAACCGTTGTAAGGGAAGCGAATAGAGATAGAAATTCCTCTGGCCGGATTCAGCCGCTCCAGCATCGCGGCGTGCTTGGTTTCGATCTTTATAAGACGAGCCTTGTGCGCATGCGTTGCGTGACCGGTGCACTTCCGCTTGGGCGAATGTCAACGTCGGTTTGCGTGGCGTCAAAAAGCCGCATGCACGGTAGGTCTCACGGGATCGGTAAGGCTTGCGTGCAAACGACTCCATGTAGACCGAGTTCTGTCGCAGCACGTACCTCTCCTCGCGGAGAAGGTTGATGTCCTCGTCGCTATGTCGGTTTACCGTCGCTTGGCGGACGGCTTTGCCTGTGCGCTTAAGTGCGGCCGTTTAGACGATGGGGAAAATACATACAC…
Bessho-Uehara 2020, Marine Biology	MN955300.1	NA	Animalia	Cnidaria	Anthozoa	Scleralcyonacea	Kophobelemnidae	Kophobelemnon	Kophobelemnon sp.	yes	0	NA	yes	2	37, 46	GAGAGTTAAAAAGTGCGTGAAACCGTTGGAAGGGAAGCGAATGGAGTCAGCAATTCGCCCAGTACGATTCAGTCGCGTACCGTTCGGTCGCGTGCCCGATGTCGATCTTCCGAGACGAAACGTGCACCTCCGGCCGGACGTTCGCGGCGCACTTCGCATGGGCGAGCGTCAACGTCGGTAGACGCACGAGTGAGAAAGCTGCGAGAATGGTAGGTCCTTCGGGACTGGNTAAGCCTCGCTAGCACCTAACCCGTAGTCCACCGAGGCGGTCGCATCGCGTGCCTTAGGCTGATGTTCTGTGCCGTTGCGTCGGSTGCGAAACGTGGCGGACGGCTATGCCTGTGCGCTCGAACCGTCGCCGTGCAACGGCACGTCGAATATACACCACGYGTTGAGGAC…
Bessho-Uehara 2020, Marine Biology	MN955301.1	NA	Animalia	Cnidaria	Anthozoa	Scleralcyonacea	Protoptilidae	Distichoptilum	Distichoptilum gracile	yes	0	NA	no	NA	NA	GAGAGTTAAAGAGTACGTGAAACCGTTGAAAGGGAAGCGAATGGAGTTAGCAATTCGCCTCGCCAGATTCAGTTTTTCGCCTCCCGAGACGCGCGTCATCTCGATCTCTGTAGACGAGTGGCGTGCGGACGCGGGACGTGAGAGGCGCACTTCTGGCGGGCGAGCGTCAACGTCGGTCTTCGACGAGCTACAAGGTCGAGAGGAAGGTAGATTGGCCTTCGGGTCGGTTGTTAAGCCTCTCGAACGCACGGCTCGTCGGAGACCGTGGCAACTTAGTCGCGACGCGTGCCTCCCTTCGGGGTGGGCTGGTGTCCCGTTTTGCTTGTGCGGTTGTCGACCGTGGCGGACGGCACGCCTGTGCGCTCGAACCGCTGCCGTACAACATTTCGGTGACACACA…
Bessho-Uehara 2020, Marine Biology	MN955302.1	NA	Animalia	Cnidaria	Anthozoa	Scleralcyonacea	Funiculinidae	Funiculina	Funiculina sp.	yes	0	NA	no	NA	NA	GAGAGTTAAAGAGTACGTGAAACCGTTGAAAGGGAAGCGAATGGAGTTAGCAATTCGCCTTGCCAGATTCAGTTTCTCGCGTCCCGCGACGTGTGTGCCCTCGATCTTTGTAGACGAGGCGTGTGCGGACGCGGAACCGCGGGAGGCGCACTTCTGGCTGGTGAGCGTCAACGTCGGCCTTGGGCGAGCCACAAGATCGCGAGGAAGGTGGACTTTCCTTCTGGAGAGTTGTTATAGCCTTGCGAACGAATGGCTCGTCGGAGGTCGTGGCAAATCGTCGCGACGCGTGCCTACCTTCGTAAGAGGGTGGGCTGGTGTCCTGTTCTGTTSGTCCGATTGTCGACCGTGGCGGACGGCACGCCTGTGCGCTCGAACCGCTTTCGGTCAACAGGTCGGTGA…
Bessho-Uehara 2020, Marine Biology	MN955303.1	NA	Animalia	Cnidaria	Anthozoa	Scleralcyonacea	Coralliidae	Heteropolypus	Heteropolypus ritteri	yes	0	NA	no	NA	NA	GAGAGTTAAAGAGTACGTGAAACCGTTAAAAGGGAAGCGAATGAAACCAGCAATTTACCGTTTCGGATTCAGTCGCCTGCGCTCGAGCAAGTGCTTGTCCGCGATTTTTTTCCTAGACGCGACTCGTGCAATTGCCCGAGAGCAGGCTGCGCACTTCCGAAAGGTCAGTGTCAGCATCAGTTGGTCACCGGTTAGAAGGTTGCGACGAAGGTAGATCCTGCGGGGTTGTTGAGCGTCGCGAACAAATGACCCGAGGCCGACTGTAGTCTCTCGCAATGCGCGCCGCCGTAGGCTGGCTGGTGCCCTGTCCTGTTGACACGGTTGTCGACCGCGGCGGACGGCTTTGCCKGTGCGTCCAAACCGCTGCCTGTCAACAGGTCRGCCTGCACACACCACGCG…
Bessho-Uehara 2020, Marine Biology	MN955304.1	NA	Animalia	Cnidaria	Anthozoa	Scleralcyonacea	Keratoisididae	Isidella	Isidella tentaculum	yes	1	23	no	NA	NA	GAGAGTTAAAAAGTGCGTGAAATCGCTGGAAGGGAAGCGAATGGAGTCGCCAATTCACCTGGTCAGATTCAGCCGCTCGCTTTCCACAACGCGCACGCATTTTCGCGATCTTCCCAGACGCATCGTGTGCGACGTGGRATGGGCGTGGCGCACTTCTGTCACGTGAACGTCAACGTCAGTTCACTGCGAGTCAAACGGCCCCGAGGACGGTAGGTCCGCTTTTTGCGGGATCGGTAAGCCTCTCGTGCCCACGACTCCACGTGGACTGTGTCCTGTCGCAGCGCGGGCCTTCCTTTCGRGGACAGGCTGCAGTCTCGTCGCTCGACCGCTCTTGGCGTTAAACGRACGGCGATGCCTGTGCGTTACAAACGCTGCCGGTCGACTGGCGAGGGAAATCGA…
Bessho-Uehara 2020, Marine Biology	MN955305.1	NA	Animalia	Cnidaria	Anthozoa	Scleralcyonacea	Keratoisididae	Lepidisis	Lepidisis sp.	yes	1	23	no	NA	NA	GAGAGTTAAAAAGTGCGTGAAATCGCTGGAAGGGAAGCGAATGGAGTCGCCAATTCACCTGGTCAGATTCAGCCGCTCGCTTTCCACAACGCGCTCGCATTTTCGCGATCTTACCAGACGCATCGTGTGCGACGTGGAATGGGCGTGGCGCACTTCTGTCACGTGAACGTCAACGTCAGTTCACTGCGAGTCAAGCGGCCCCGAGGACGGTAGGTCCCGTTTTTGCGGGATCGGTAAGCCTCTCGTGCCCGCGACTCCACGTGGACTGTGTCMTGTCGCAGCGCGGGCCTSCCTTTCGAGGRCAGGCTGCAGTCTCGTCGATCGACCGCTCRTGGCGTTAAACGGACGGCGATGCCTGTGCGTTACAAGCGCTGCCGGTCGMCTGGCGAGGGAAATCGA…
Bessho-Uehara 2020, Marine Biology	MN955306.1	NA	Animalia	Cnidaria	Anthozoa	Scleralcyonacea	Coralliidae	Paragorgia	Paragorgia arborea	yes	0	NA	no	NA	NA	GAGAGTTAAAGAGTACGTGAAACCGTTAAAAGGGAAGCGAATGAAACCAGCAATTCGCCTTGCCAGATTCAGTCGCCTGCGCTCGATCACGTGCTTGTTCGCGATTTTTTCAGACGCGACTCGTACAGTTGGCCGAGCGAAGGCTGCGCACTTCTGGTAGGTGAGTGTCAGCATCAGATGGTCACGGGTTAGAAAGTTGCGATGAAGGTAGATCCTTACGGATTGTTCAGCGTCGCAAACAAATCACCCGAGGCTGCCTGTGGTCTATCGCAATGCGTGCCTTCCGTGGGTTGGCTGGTGTCCTGTTCTGTTGATGCGGTTGTCGACTGCGGCGGACGGCTATGCCAGTGCGTCCAAACCGCTTCCCGTCTCCAGATCGGGGTGCACACACCACGCGTT…
Bessho-Uehara 2020, Marine Biology	MN955307.1	NA	Animalia	Cnidaria	Anthozoa	Scleralcyonacea	Pennatulidae	Pennatula	Pennatula sp.	yes	1	30	no	NA	NA	GAGAGTTAAACAGTGCGTGAAACCGTTGAGAGGGAAGCGAATGGAGTTAGCAATTCGCTTGCCAGATTCAGTTTCCAGCTTGCCGCGACGTTCGCGTTCTCGATCTTCGTAGACGAGTCGCGACCGCGCACGGCACGCCGGGGACGCACTTCTGGCGGGCGATCGTCACCGTCGGTTTCGGACGAACTAAGGGATTGCAAGGAAGGTAAACCGGTCGTTGGCCGTTTGTTAAGCCTTGCTTTCGTCCTGTCCGTCGGAGACCGGGGAAAGCGGCGCGCGCCTATAAATACGGGCTGGTGTCCCGTCTTGCTGTTCGGTTGTCGACTGTGGCGGACGGCGCGCCTGTGCGCTCGAACCGCAGCCGGACAGCATTTCGGTGATCAAACACTCCGCGCCTAC…
Bessho-Uehara 2020, Marine Biology	MN955308.1	NA	Animalia	Cnidaria	Anthozoa	Scleralcyonacea	Umbellulidae	Umbellula	Umbellula sp.	yes	0	NA	no	NA	NA	GAGAGTTAAAGAGTACGTGAAACCGTTGAAAGGGAAGCGAATGGAGTTAGCAATTYRCCGCGCCAGATTCAGCTTTTCGCGTGCCGCGACGTTCGCGATCTCGATCTTTGTAGACGAGTCGCGTACGGACGCGGCGCGGGGTAGGCGCACTTCTGGTGGGCGAGCGTCAACGTCGGTCTCCGGTGAGCTACAAGGTCGCGTGGAAGGTGGACTTTCCTTCGGGAAGGTTGTTAAGCCTCGCGCACGTATGGCTCGTCGAAGTCCGTGGCATATCGTCGCGACGCGTGCCTCCYTTCGGGGTTGGCTGGTGTCTTGGTCTGTTGGTCCGGTTGTCGACCGAGTGGACGGCACGCCTGTGCACTCAAACCGCTGCCGGTCAACAGTTCGATGATCACACAC…
Sikorskaya et al. 2021, Phytochemistry	MT150638.1	NA	Animalia	Cnidaria	Anthozoa	Malacalcyonacea	Sarcophytidae	Sclerophytum	Sclerophytum heterospiculatum	yes	0	NA	no	NA	NA	GAGAGTTAAAAAGTACGTGAAACCGTTGAAAGGGAAGCGAATGGAGTTAGCAATTCGCCCTGCCAGATTCAGTTGTTCGTGCTTCGCGACGTGCGCGCTCTCGATCCGCATGGACGTGACGTGCACGGGTGCGACGTGCGGACGGCGCACTTCTGGCGGGCGAGCGTCAGCGTCGGTCGCCGACGGGCGATAAGGTCGCGAGGAAGGTAGACGTGCCTTCGGGCGCGTTGTTAAGACTCGCGTTCGCATGGCTCGACGGCGACCGTGGCTCCTTCACACGGAGGCGACGCGTGCCTGGCTGGTGACTCGTGCGATCGGTCCGGCATGTCGACCGTGGCGGACGGCACGCCTGTGCGCTCAAACTGCTGCCGGTCGCTCGCACGGTGTTCGCACACTACG…
Young et al. 2020, Unpublished	MT162686.1	NA	Animalia	Cnidaria	Anthozoa	Scleralcyonacea	Keratoisididae	Jasonisis	Jasonisis sp.	yes	0	NA	no	NA	NA	GAGAGTTAAAAAGTGCGTGAAACCGCTGGAAGGGAAGCGAATGGGGTCGGCAATTCACCTGATCAGATTCAGTCACGCGCTTTCCACAACGCGCTCGCACTTCGCGATCTTTCCAGACGCATCGCGTGCGACGTGGGAAGGGCGTGGTGCACTTCTGTCACGTGAGCGTCAACGTCAGTTCACTGCGAGTCAAACGGCCCCGAGGACGGTAGGTCCCCCTTCTGTGGGATCGGTAAGCCTCTCGTGCACACGACTCCCCGTGGACTGTGTCCTGTCGCGGCGCGGGCCTCCCTTCCGAGGGCAGGCTGCAGTCTCGTCGCTCTGCCGTTCACGGTGCTAAACGGACGGCGATGCCTGTGCGTCACAAGCACAGACGGTCGAGTGGCGAGCGACACCGAC…
Young et al. 2020, Unpublished	MT162689.1	NA	Animalia	Cnidaria	Anthozoa	Scleralcyonacea	Keratoisididae	Jasonisis	Jasonisis sp.	yes	0	NA	no	NA	NA	AGAGTTAAAAAGTGCGTGAAACCGCTGGAAGGGAAGCGAATGGGGTCGGCAATTCACCTGATCAGATTCAGTCACGCGCTTTCCACAACGCGCTCGCACTTCGCGATCTTTCCAGACGCATCGCGTGCGACGTGGGAAGGGCGTGGTGCACTTCTGTCACGTGAGCGTCAACGTCAGTTCACTGCGAGTCAAACGGCCCCGAGGACGGTAGGTCCCCCTTCTGTGGGATCGGTAAGCCTCTCGTGCACACGACTCCCCGTGGACTGTGTCCTGTCGCGGCGCGGGCCTCCCTTCCGAGGGCAGGCTGCAGTCTCGTCGCTCTGCCGTTCACGGTGCTAAACGGACGGCGATGCCTGTGCGTCACAAGCACAGACGGTCGAGTGGCGAGCGACACCCGCA…
Campoy et al. 2020, Frontier's in Marine Science	MT280769.1	NA	Animalia	Cnidaria	Anthozoa	Scleractinia	Flabellidae	Flabellum	Flabellum sp.	no	NA	NA	no	NA	NA	GAGAGTTAAAGAGTACGTGAAACCGTTGGAAGGGAAACGAATGCACTCAGCAATGCGCCGTTCGAGATTCAGCCGGGCGGCGGGGTCGGCGCGGGGTCTCTGCGGATCCGAACGGACCGCGGCCTCGTGCGCGTCCTCGTCGACCGTCGCACTTCTCTTGGGCGCGCGTCAACGTCGGTCGGCGGTGGGTCTGAAGGGTTCCGGGAAGGTGAGTTCGGGGGGCCCTGGTTCTCCGTTCCGTTTACAGCCCGGTTCTCGGATTGGCTCGCGGYCGACCGAGGCAGAGTGTCGCAGCGCATGCCTCCATTTGGCTGGGGTCCCGTCGCTCCGGCCGGTCGTCGACCGCGGTGGACTGCTCGCAGTGCTCCGCGACTGCTGCCGGTCGTTGGGGCGGTGATG…
Barret et al. 2020, Frontiers in Mar. Sci.	MT318863.1	NA	Animalia	Cnidaria	Anthozoa	Antipatharia	Antipathidae	Antipathes	Antipathes cf. dichotoma	yes	0	NA	no	NA	NA	GAGAGTTAAAAAGTACGTGAAACCGTTAAAAGGGAAACGAATGGAGCTAGCAATGCACCCTGCGAGATTCAGCCGGTGGGTGGTTCGGGCGCGCGGTTTGCAGATCTGAATTGACTGCGGCCGCGTGGTTTGGGCTCCCCGCCGTCGCACTTCTCGCGGGTGCGCGTCAACATGGGTTGGGACCGGGTCTTAAAGGCGTCGGCAAGGTAGGTCCGTCCCTCCGGGGTCGGACTGTTTAGGCCGGCGTTCTCGCGGCTCGGGCCCGACCGAGGCGATTGCAGCACATGCCTCTTGTGGCTGGTGTCTCGTTCCTCCGGTTGGTTGTCGACCGTGGTGGACTGCTTGCAGTGCACCRCGACTGCTGCCGGTCGCTGGGGCGGTGACTTCGCACGATGTGCT…
Barret et al. 2020, Frontiers in Mar. Sci.	MT318864.1	NA	Animalia	Cnidaria	Anthozoa	Antipatharia	Schizopathidae	Bathypathes	Bathypathes sp.	yes	0	NA	no	NA	NA	GAGAGTTAAAAAGTACGTGAAACCGTTAAAAGGGAAACGAATGGAGCTAGCAATGCACCCAGCGAGATTCAGCTGGTTGGTGGATCGGCCGCGATGTGTGCAGATCTGAATTGACTGCGGCTTCGTGGTTCGAGCTCCCTGCCATCGCACTTCTCGCGGGCGCGCGTCAACATGGGTTGGGACCGGGTCTAAACGGCACCGGCAAGGTAAGTCCGCACCTCCGGGTACGTACTGTTCTAGGCCGGCGCTCTCGCGGCCCGGACCCGACCGAGGCGATGCAGCACATGCCTCTTGTGGCTGGGGTCCCGTTCTTCCGGTTGGTTGTCGACTGTGGTGGACTGCGTGCAGTGCACCGCGACTGCTGCCGGTCGCTTGGGCGGTGACTTCGCATGATGTGCT…
Barret et al. 2020, Frontiers in Mar. Sci.	MT318865.1	NA	Animalia	Cnidaria	Anthozoa	Antipatharia	Schizopathidae	Bathypathes	Bathypathes sp.	yes	0	NA	no	NA	NA	GAGAGTTAAAAAGTACGTGAAACCGTTAAAAGGGAAACGAATGGAGCTAGCAATGCACCCAGCGAGATTCAGCTGGTTGGTGGCTCGGCCGCGATGTTTGCAGATCTGAATTGACTGCGGCTTTGCGGTTCGAACTCCCTGCCATCGCACTTCTCGCGGGCGCGCGTCAACATGGGTTGGGACCGGGTCTAAACGGCACCGGCAAGGTAGGTCCGCACCTCCGGGTACGTACTGTTCTAGGCCGGCGCTCTCGCGGCCCGGACCCGACCGAGGCGATGCAGCACATGCCTCTTGTGGCTGGAGTCCCGTTCTTCCGGTTGGTTGTCGACTGTGGTGGACTGCGTGCAGTGCACCGCGACTGCTGCCGGTCGCTTGGGCGGCGACTTCGCAAGATGTGCT…
Barret et al. 2020, Frontiers in Mar. Sci.	MT318866.1	NA	Animalia	Cnidaria	Anthozoa	Antipatharia	Schizopathidae	Bathypathes	Bathypathes sp.	yes	0	NA	no	NA	NA	GAGAGTTAAAAAGTACGTGAAACCGTTAAAAGGGAAACGAATGGAGCTAGCAATGCACCCAGCGAGATTCAGCTGGTTGGTGGATCGGCCGCGATGTGTGCAGATCTGAATTGACTGCGGCTTCGTGGTTCGAGCTCCCTGCCATCGCACTTCTCGCGGGCGCGCGTCAACATGGGTTGGGACCGGGTCTAAACGGCACCGGCAAGGTAAGTCCGCACCTCCGGGTACGTACTGTTCTAGGCCGGCGCTCTCGCGGCCCGGACCCGACCGAGGCGATGCAGCACATGCCTCTTGTGGCTGGGGTCCCGTTCTTCCGGTTGGTTGTCGACTGTGGTGGACTGCGTGCAGTGCACCGCGACTGCTGCCGGTCGCTTGGGCGGTGACTTCGCATGATGTGCT…
Barret et al. 2020, Frontiers in Mar. Sci.	MT318868.1	NA	Animalia	Cnidaria	Anthozoa	Antipatharia	Cladopathidae	Cladopathes	Cladopathes cf. plumosa	yes	0	NA	no	NA	NA	GAGAGTTAAAAAGTACGTGAAACCGTTAAAAGGGAAACGAATGGAGCTAGCAATGCACCCTGTGAGATTCAGCCGGTCGGTGGTCCGGGCGTGTGGTTTGCAGATCTGAATCGACTGTGGCCACACGCTTCTGGCTTCCTGCCGTCGCACTTCCCGCGGGTGCGCGTCAACATGGGTTGGGACCGGGTCTGAAAGGCACCGGCAAGGTAGGTCCGCACCTTCGGGTTCGTACTGTTCTAGGCCGGCGTTTTCGCGGCCCGTGCCTGACCGAGGAGTTTGCAGCACATGCCTCGTTTGGCTGGAGTCCCGTCCTGCCGGTTGGCTGTCGACTGTGGTGGACTGCGTGCAGTGCACCGCGACTGCAGCCGGTCGCTGGGGCGGTGACTTCGCACGATGTGC…
Barret et al. 2020, Frontiers in Mar. Sci.	MT318869.1	NA	Animalia	Cnidaria	Anthozoa	Antipatharia	Schizopathidae	Dendrobathypathes	Dendrobathypathes sp.	yes	0	NA	no	NA	NA	GAGAGTTAAAAAGTACGTGAAACCGTTAAAAGGGAAACGAATGGAGCTAGCAATGCACCCAGTGAGATTCAGCCGGTTGGTGGCTTGGGCGCTCCGTTTGCAGATCTGAATTGACTGCGGCGGTGTGGTTCGAGCTCCCTGCCGTCGCACTTCTCGCGGGCGCGCGTCAACATGGGTTGGGACCGGGTCTAAAAGGCACCGGCAAGGTAGGTCCGTACCTCCGGGTACGTACTGTTCTAGGCCGGCGTTCTCGCGGCCCGGGCCCGACCGAGGCGATGCAGCACATGCCTCTTGTGGCTGGGGTCCCGTTCTTCCGGTTGGTTGTCGACTGTGGTGGACTGCGTGCAGTGCACCGCGACTGCTGCCGGTCGCTGGGGCGGTGACTTCGCATGATGTGCT…
Barret et al. 2020, Frontiers in Mar. Sci.	MT318870.1	NA	Animalia	Cnidaria	Anthozoa	Antipatharia	Leiopathidae	Leiopathes	Leiopathes cf. glaberrima	yes	0	NA	no	NA	NA	GAGAGTTAAAAAGTACGTGAAACCGTTAAAAGGGAAACGAATGGAGCTAGCAATGCGCCCTGTGAGATTCAGCCGGCCGGTGGTCCAGGTGCGTGGCTTGCAGATCTGAATTGACTGCGGCCGCGTGGTTTGGGCTCCCGACCGTCGCACTTCTTGCGGGCGCGCGTCAACATGGGTTGGGAGTGGGTCTGAAAGGCACCGGGAAGGTAGGTCCGACCCCTCGGGGCTGGTCTGTTATAGTCCGGTGTTCTCATGGCTCGCGCCCGACCGAGGAGTTGCAGCACATGCCTCTTGTGGCTGGGGTCCCGTCGTTCCGGTTGGTTGTCGACGGCGGTGGACTGCGTGCAGTGCACCGCGACTGCTGCCGGTCGCTACGGTGGTGACTTCGCACCATGTGCT…
Barret et al. 2020, Frontiers in Mar. Sci.	MT318871.1	NA	Animalia	Cnidaria	Anthozoa	Antipatharia	Leiopathidae	Leiopathes	Leiopathes expansa	yes	0	NA	no	NA	NA	GAGAGTTAAAAAGTACGTGAAACCGTTAAAAGGGAAACGAATGGAGCTAGCAATGCGCCCTGTGAGATTCAGCCGGCCGGTGGTCCAGGCGCGTGGCTTGCAGATCTGAATTGACTGCGGCCGCGTGGTTTGGGCTCCCGACCGTCGCACTTCTTGCGGGCGCGCGTCAACATGGGTTGGGAGTGGGTCTGAAAGGCACCGGGAAGGTAGGTCCGACCCCTCGGGGCTGGTCTGTTATAGTCCGGTGTTCTCATGGCTCGCGCCCGACCGAGGAGTTGCAGCACATGCCTCTTGTGGCTGGGGTCCCGTCGTTCCGGTTGGTTGTCGACGGCGGTGGACTGCGTGCAGTGCACCGCGACTGCTGCCGGTCGCTACGGTGGTGACTTCGCACCATGTGCT…
Barret et al. 2020, Frontiers in Mar. Sci.	MT318872.1	NA	Animalia	Cnidaria	Anthozoa	Antipatharia	Leiopathidae	Leiopathes	Leiopathes montana	yes	0	NA	no	NA	NA	GAGAGTTAAAAAGTACGTGAAACCGTTAAAAGGGAAACGAATGGAGCTAGCAATGCGCCCTGTGAGATTCAGCCGGCCGGTGGTCCAGGCGCGTGGCTTGCAGATCTGAATTGACTGCGGCCGCGTGGTTTGGGCTCCCGACCGTCGCACTTCTTGCGGGCGCGCGTCAACATGGGTTGGGAGTGGGTCTGAAAGGCACCGGGAAGGTAGGTCCGACCCCTCGGGGCTGGTCTGTTATAGTCCGGTGTTCTCATGGCTCGCGCCCGACCGAGGAGTTGCAGCACATGCCTCTTGTGGCTGGGGTCCCGTCGTTCCGGTTGGTTGTCGACGGCGGTGGACTGCGTGCAGTGCACCGCGACTGCTGCCGGTCGCTACGGTGGTGACTTCGCACCATGTGCT…
Barret et al. 2020, Frontiers in Mar. Sci.	MT318873.1	NA	Animalia	Cnidaria	Anthozoa	Antipatharia	Schizopathidae	Parantipathes	Parantipathes cf. hirondelle	yes	0	NA	no	NA	NA	GAGAGTTAAAAAGTACGTGAAACCGTTAAAAGGGAAACGAATGGAGCTAGCAATGCACCCAGTGAGATTCAGCCTGTAGGTGGCTAGGGCGCGCTGTTTGCAGATCTGAATTGACTGCTGCAGTGCGGTTCGAGCTCCCTGCCGTCGCACTTCTCGCGGGCGCGCGTCAACATGGGTTGGGACCGGGTCTTAAAGGCACCGGCAAGGTAGGTCCGTACCTCCGGGTACGTACTGTTCTAGGCCGACGTTCTCGCGGCCCGGGCCCGACCGAGGCGATGCAGCACATGCCTCTTGTGGCTGGGGTCCCGTTCTTCCGGTTGGTTGTCGACTGTGGTGGACTGCGTGCAGTGCACCACGACCGCTGCCGGTCGCTTGGGCGGTGACTTCGCATGATGTGCT…
Barret et al. 2020, Frontiers in Mar. Sci.	MT318874.1	NA	Animalia	Cnidaria	Anthozoa	Antipatharia	Schizopathidae	Parantipathes	Parantipathes sp.	yes	0	NA	no	NA	NA	GAGAGTTAAAAAGTACGTGAAACCGTTAAAAGGGAAACGAATGGAGCTAGCAATGCACCCAGTGAGATTCAGCCKGTAGGTGGCTAGGGCGCGCTGTTTGCAGATCTGAATTGACTGCTGCAGTGCGGTTCGAGCTMCCTGCCGTCGCACTTCTCGCGGGCGCGCGTCAACATGGGTTGGGACCGGGTCTAAAAGGCACCGGCAAGGTAGGTGCGTRCCTCCGGGTACGTACTGTTCTAGGCCGACGTTCTCGCGGCCCGGGCCCGACCGAGGCGATGCAGCACATGCCTCTTGTGGCTGGGGTCCCGTTCTTCCGGTTGGTTGTCGACTGTGGTGGACTGCGTGCAGTGCACCRCGACCGCTGCCGGTCGCTTGGGCGGTGACTTCGCATGATGTGCT…
Barret et al. 2020, Frontiers in Mar. Sci.	MT318875.1	NA	Animalia	Cnidaria	Anthozoa	Antipatharia	Schizopathidae	Parantipathes	Parantipathes hirondelle	yes	0	NA	no	NA	NA	GAGAGTTAAAAAGTACGTGAAACCGTTAAAAGGGAAACGAATGGAGCTAGCAATGCACCCAGTGAGATTCAGCCTGTAGGTGGCTAGGGCGCGCTGTTTGCAGATCTGAATTGACTGCTGCAGTGCGGTTCGAGCTCCCTGCCGTCGCACTTCTCGCGGGCGCGCGTCAACATGGGTTGGGACCGGGTCTTAAAGGCACCGGCAAGGTAGGTCCGTACCTCCGGGTACGTACTGTTCTAGGCCGACGTTCTCGCGGCCCGGGCCCGACCGAGGCGATGCAGCACATGCCTCTTGTGGCTGGGGTCCCGTTCTTCCGGTTGGTTGTCGACTGTGGTGGACTGCGTGCAGTGCACCGCGACCGCTGCCGGTCGCTTGGGCGGTGACTTCGCATGATGTGCT…
Barret et al. 2020, Frontiers in Mar. Sci.	MT318876.1	NA	Animalia	Cnidaria	Anthozoa	Antipatharia	Aphanipathidae	Phanopathes	Phanopathes sp.	yes	0	NA	no	NA	NA	GAGAGTTAAAAAGTACGTGAAACCGTTAAAAGGGAAACGAATGGAGCTAGCAATGCACCCTGCGAGATTCAGCCGGTGGGCGTTTCGGGCGCGCGGTTTGCAGATCTGAATTGACTGCGGCCGCACGGTTCGGGCTCCCCGCCGTCGCACTTCTCGCGGGTGCGCGTCAACATGGGTTGGGACCGGGTCTTAAAGGCGCCGGGAAGGTAGGTCCGTCCCTTCGGGGTCGGACTGTTTAGGCCGGCGTTCTCGCGGCCCGGGCCCGACCGAGGTGATGCAGCACATGCCTCTTGTGGCTGGTTTCTCGTTCCTCCGGTTGGTTGTCGACTGTGGTGGACTGCTTGCAGTGCACCGCGACTGCTGCCGGTCGCTGGGGCGGTGACTTCGCACGATGTGCTT…
Barret et al. 2020, Frontiers in Mar. Sci.	MT318877.1	NA	Animalia	Cnidaria	Anthozoa	Antipatharia	Cladopathidae	Sibopathes	Sibopathes cf. macrospina	yes	0	NA	no	NA	NA	GAGAGTTAAAAAGTACGTGAAACCGTTAAAAGGGAAACGAATGGAGCTAGCAATGCACCCAGTGAGATTCAGCCAGTAGGTGGCTAGGGCGCGCTGTTTGCAGATCTGAATTGACTGCGGCAGCGCGGTTCTAGCTCCCTGCCGTCGCACTTCTCGCGGGCGCGCGTCAACATGGGTTGGGACCGGGTCTGAAAGGCACCGGCAAGGTAGGTGCGTATCTCCGGGTACGTACTGTTCTAGGCCGACGTTCTCGCGGCCCGGGCCCGACCGAGGCGATGCAGCACATGCCTCTTGTGGCTGGGGTCCCGTTCTTCCGGTTGGTTGTCGACTGTGGTGGACTGCGTGCAGTGCACCGCGACCGCTGCCGGTCGCTTGGGCGGTGACTTCGCACAATGTGCT…
Barret et al. 2020, Frontiers in Mar. Sci.	MT318878.1	NA	Animalia	Cnidaria	Anthozoa	Antipatharia	Schizopathidae	Stauropathes	Stauropathes cf. punctata	yes	0	NA	no	NA	NA	GAGAGTTAAAAAGTACGTGAAACCGTTAAAAGGGAAACGAATGGAGCTAGCAATGCACCCCGTGAGATTCAGCTGGTTGGTGGCTCGGCCGCRATGTTTGCAGATCTGAATTGACTGCGGCTTTGTGGTTCGAACTCCCTGCCATCGCACTTCTCGCGGGCGCGCGTCAACATGGGTTGGGACCGGGTCTAAAAGGCACCGGCAAGGTAGGTCCGCACCTCCGGGTACGTACTGTTCTAGGCCGGCGCTCTAGCGGCCCGKGCCCGACCGAGGCGATGCAGCACATGCCTCTTGTGGCTGGGGTCCCGTTCTTCCGGTTGGTTGTCGACTGTGGTGGACTGCGTGCAGTGCACCGCGACTGCTGCCGGTCGCTTGGGCGGTGACTTCGCATGATGTGCT…
Barret et al. 2020, Frontiers in Mar. Sci.	MT318879.1	NA	Animalia	Cnidaria	Anthozoa	Antipatharia	Schizopathidae	Stauropathes	Stauropathes arctica	yes	0	NA	no	NA	NA	GAGAGTTAAAAAGTACGTGAAACCGTTAAAAGGGAAACGAATGGAGCTAGCAATGCACCCAGCGAGATTCAGCTGGTTGGTGGATCGGCCGCGATGTGTGCAGATCTGAATTGACTGCGGCTTCGTGGTTCGAGCTCCCTGCCATCGCACTTCTCGCGGGCGCGCGTCAACATGGGTTGGGACCGGGTCTAAACGGCACCGGCAAGGTAAGTCCGCACCTCCGGGTACGTACTGTTCTAGGCCGGCGCTCTCGCGGCCCGGACCCGACCGAGGCGATGCAGCACATGCCTCTTGTGGCTGGGGTCCCGTTCTTCCGGTTGGTTGTCGACTGTGGTGGACTGCGTGCAGTGCACCGCGACTGCTGCCGGTCGCTTGGGCGGTGACTTCGCATGATGTGCT…
Barret et al. 2020, Frontiers in Mar. Sci.	MT318880.1	NA	Animalia	Cnidaria	Anthozoa	Antipatharia	Antipathidae	Stichopathes	Stichopathes abyssicola	yes	0	NA	no	NA	NA	GAGAGTTAAAAAGTACGTGAAACCGTTAAAAGGGAAACGAATGGAGCTAGCAATGCACCCTGCGAGATTCAGCCGGTGGGTGGTTCGGGCGCGCGGTTTGCAGATCTGAATTGACTGCGGCCGCGTGGTTTGGGCTCCCCGCCGTCGCACTTCTCGCGGGTGCGCGTCAACATGGGTTGGGACCGGGTCTTAAAGGCGTCGGCAAGGTAGGTCCGTCCCTCCGGGGTCGGACTGTTTAGGCCGGCGTTCTCGCGGCTCGGGCCCGACCGAGGCGATTGCAGCACATGCCTCTTGTGGCTGGTGTCCCGTTCCTCCGGTTGGTTGTCGACCGTGGTGGACTGCTTGCAGTGCACCACGACTGCTGCCGGTCGCTGGGGCGGTGACTTCGCACGATGTGCT…
Barret et al. 2020, Frontiers in Mar. Sci.	MT318881.1	NA	Animalia	Cnidaria	Anthozoa	Antipatharia	Antipathidae	Stichopathes	Stichopathes sp.	yes	0	NA	no	NA	NA	GAGAGTTAAAAAGTACGTGAAACCGTTAAAAGGGAAACGAATGGAGCTAGCAATGCACCCTGCGAGATTCAGCCGGTGGGTGGTTCGGGCGCGCGGTTTGCAGATCTGAATTGACTGCGGCCGCGCGGTTCGGGCTCCCCGCCGTCGCACTTCTCGCGGGTGCGCGTCAACATGGGTTGGGACCGGGTCTTAAAGGCGCTGGCAAGGTAGGTCCGTCCCTTCGGGGTCTGACTGTTTAGGCTGGCGTTCTCGCGGCCCGGGCCCGACCGAGGAGATGCAGCACATGCCTCTTGTGGCTGGTGTCTCGTTCCTCCGGTTGGTTGTCGACTGTGGTGGACTGCTTGCAGTGCACCGCGACTGCTGCCGGTCGCTGGGGCGATGACTTCGCACTATGTGCTT…
Barret et al. 2020, Frontiers in Mar. Sci.	MT318882.1	NA	Animalia	Cnidaria	Anthozoa	Antipatharia	Schizopathidae	Telopathes	Telopathes sp.	yes	0	NA	no	NA	NA	GAGAGTTAAAAAGTACGTGAAACCGTTAAAAGGGAAACGAATGGAGCTAGCAATGCACCCAGTGAGATTCAGCTGGTTGGTGGTTCGGCCACGATGTTTGCAGATCTGAATTGACTGCGGCTTTGTGGTCCGAACTCCCTGCCATCGCACTTCTCGCGGGTGCGCGTCAACATGGGTTGGGACCGGGTCTTAAAGGCAACGGCAAGGTAGGTCCGCACCTCCGGGTACGTACTGTTCTAGGCCGGCGCTCTCACGGCCCGGGCCCGACCGAGGCGATGCAGCACATGCCTCTTGTGGCTGGGGTCCCGTTCTTCCGGTTGGTTGTCGACTGTGGTGGACTGCGTGCAGTGCACCGCGACTGCTGCCGGTCGCTTGGGCGGTGACTTCGCATCATGTGCT…
Barret et al. 2020, Frontiers in Mar. Sci.	MT318883.1	NA	Animalia	Cnidaria	Anthozoa	Antipatharia	Cladopathidae	Trissopathes	Trissopathes cf. tetracrada	yes	0	NA	no	NA	NA	GAGAGTTAAAAAGTACGTGAAACCGTTAAAAGGGAAACGAATGGAGCTAGCAATGCACCCTGTGAGATTCAGCCGGTCGGTGGTCCGGGCGTGTGGTTTGCAGATCTGAATCGACTGTGGCCACACGCTTCTGGCTTCCTGCCGTCGCACTTCCCGCGGGTGCGCGTCAACATGGGTTGGGACCGGGTCTGAAAGGCACCGGCAAGGTAGGTCCGCACCTTCGGGTTCGTACTGTTCTAGGCCGGCGTTTTCGCGGCCCGTGCCTGACCGAGGAGTTTGCAGCACATGCCTCGTTTGGCTGGAGTCCCGTCCTGCCGGTTGGCTGTCGACTGTGGTGGACTGCGTGCAGTGCACCGCGACTGCAGCCGGTCGCTGGGGCGGTGACTTCGCACGATGTGC…
Barret et al. 2020, Frontiers in Mar. Sci.	MT318885.1	NA	Animalia	Cnidaria	Anthozoa	Antipatharia	Stylopathidae	Tylopathes	Tylopathes sp.	yes	0	NA	no	NA	NA	GAGAGTTAAAAAGTACGTGAAACCGTTAAAAGGGAAACGAATGGAGCTAGCAATGCACCCTGCGAGATTCAGCCGGTGTGTGGCTCGGGCGCGTGGTTTGCAGATCTGAATTGACTGCGGCCGCGCGGTTCGGGCTCCCCGCCGTCGCACTTCTCGCGGGTGCGCGTCAACATGGGTTGGGACCGGGTCTTAAAGGCGTCGGCAAGGTAAGTCCGTCCCCTCGGGGACTGACTGTTTAGGCCGGCACTCTCACGGCCCGGGCCCGACTGAGGAGTTGCAGCACATGCCTCTTGTGGCTGGGGTCCCGTTCCTCCGGTTGGTTGTCGACTGTGGTGGACTGCTTGCAGTGCACCGCGACTGCTGCCGGTCGCTGGGGCGGTGGCTTCGCACTATGTGCTT…
Imahara et al. 2020, Zootaxa	MT419962.1	NA	Animalia	Cnidaria	Anthozoa	Malacalcyonacea	Siphonogorgiidae	Chironepthya	Chironepthya sirindhornae	yes	0	NA	no	NA	NA	GTACGTGAAACCGTTGAAAGGGAAGCGAATGGAGTTAGCAATTCGCCCAGCCAGACTCAGTTGCCCGTGCTTCGCGACGTGCGCGCTCTCGATCCACATGGACGAGACGTGGACGGGTGCGATGTGCGAGCGGCGCACTTCTGGCGGGCGAGCGTCAGCGTCGGTTGTCGACGGGCGATAAGGACGCGAGGAAGGTGAACTTGCTGTTCGCGCAGCGGGTTGTTAAGCCTCGCGGTTCGCATAGCTCGACGGCGACCGTGGCTCGTGGAGTCGACGCGTGCTTGGCTGGCCACTCGTGCGATCGGTCCGGCATGTCGAACGTGGCGGACGGCACGCCTGTGCGCTCAAACTGCGGCCGGTCGCTCGCACGATGTGTGCTCACTACGCGTCCAAGATGCT…
Imahara et al. 2020, Zootaxa	MT419963.1	NA	Animalia	Cnidaria	Anthozoa	Malacalcyonacea	Siphonogorgiidae	Chironepthya	Chironepthya cornigera	yes	0	NA	no	NA	NA	GAGAGTTAAAAAGTACGTGAAACCGTTGAAAGGGAAGCGAATGGAGTTAGCAATTCGCCCAGCCAGACTCAGTTGCCCGTGCTTCGCGACGTGCGCGCTCTCGATCCACATGGACGAGACGTGGACGGGTGCGATGTGCGAGCGGCGCACTTCTGGCGGGCGAGCGTCAGCGTCGGTTGTCGACGGGCGATAAGGACGCGAGGAAGGTGAACTTGCTGTTCGCGCAGCGGGTTGTTAAGCCTCGCGGTTCGCATAGCTCGACGGCGACCGTGGCTCGTGGAGTCGACGCGTGCTTGGCTGGCCACTCGTGCGATCGGTCCGGCATGTCGAACGTGGCGGACGGCACGCCTGTGCGCCCAAACTGCGGCCGGTCGCTCGCACGATGTGTGCTCACTACGC…
Nunez-Flores et al. 2021, Invertebrate Systematics, 2021	MT892715.1	NA	Animalia	Cnidaria	Anthozoa	Scleralcyonacea	Primnoidae	Thouarella	Thouarella viridis	yes	0	NA	no	NA	NA	GAGAGTTAAAAAGTGCGTGAAACCGTTGGAAGGGAAGCGAATAGAGATAGAAATTCTCCTGGTCGGATTCAGCCGATCCAGCATCGCGTCGTGCTCGGTTTCGATCTTTACAGACGAGCCTTGTACGCTTGCGTTGCGTGACCGGTGCACTTCCGCTTGGCGAATGTCAACGTCGGTTTGCGTGGAGTGAAAAAGCCGCATGCACGGTAGGTCCCACGCGGGATCGGTAAGGCTTGCGTGCAATCGACTCCATGTAGACCGAGTTCTGTCGCAGCACGTACCTCTCCTCGCGGAGAAGGTTGATGTCCTCATCGTTATGTCGGTTTACCGTCGCTTGGCGGACGGCTTTGCCTGTGCGTTTAAGTGCGGCCGTTTAGACGATGNGCAAAATACATACAC…
Nunez-Flores et al. 2021, Invertebrate Systematics, 2021	MT892716.1	NA	Animalia	Cnidaria	Anthozoa	Scleralcyonacea	Primnoidae	Thouarella	Thouarella andeep	yes	0	NA	no	NA	NA	GAGAGTTAAAAAGTACGTGAAACCGTTGGAAGGGAAGCGAATAGAGATAGAAATTCCCCTGGCCGGATTCAGCCGCTCCAGCATCGCGGCGTGCTTGGTTTCGATCTTTATAGACGAGCCTTGTACGCTTGCGTTGCGTGACCGGTGCACTTCTGCTTGGGCGAATGTCAACGTCGGTTTGCGTGGTGTCAAAAAGCCGCATGCACGGTAGGTCTCGCGGGAGATCGGTAAGGCATGCGTGCAAACGACTCCATGTAGACCGAGTTCGGTCGCAGCACGTACCTCTCCTCGCGGAGAAGGTTGATGTCCTCATCGTTATGTCGGTTTACCGTCTCTTGGCGGACGGCTTTGCCTGTGCGTTGAAGTGCGGCCGTCTAGACGATGGGCATAATACATACA…
Nunez-Flores et al. 2021, Invertebrate Systematics, 2021	MT892717.1	NA	Animalia	Cnidaria	Anthozoa	Scleralcyonacea	Primnoidae	Thouarella	Thouarella andeep	yes	0	NA	no	NA	NA	GAGAGTTAAAAAGTACGTGAAACCGTTGGAAGGGAAGCGAATAGAGATAGAAATTCCCCTGGCCGGATTCAGCCGCTCCAGCATCGCGGCGTGCTTGGTTTCGATCTTTATAGACGAGCCTTGTACGCTTGCGTTGCGTGACCGGTGCACTTCTGCTTGGGCGAATGTCAACGTCGGTTTGCGTGGTGTCAAAAAGCCGCATGCACGGTAGGTCTCGCGGGAGATCGGTAAGGCATGCGTGCAAACGACTCCATGTAGACCGAGTTCGGTCGCAGCACGTACCTCTCCTCGCGGAGAAGGTTGATGTCCTCATCGTTATGTCGGTTTACCGTCTCTTGGCGGACGGCTTTGCCTGTGCGTTGAAGTGCGGCCGTCTAGACGATGGGCATAATACATACA…
Nunez-Flores et al. 2021, Invertebrate Systematics, 2021	MT892718.1	NA	Animalia	Cnidaria	Anthozoa	Scleralcyonacea	Primnoidae	Thouarella	Thouarella andeep	yes	0	NA	no	NA	NA	GAGAGTTAAAAAGTACGTGAAACCGTTGGAAGGGAAGCGAATAGAGATAGAAATTCCCCTGGCCGGATTCAGCCGCTCCAGCATCGCGGCGTGCTTGGTTTCGATCTTTATAGACGAGCCTTGTACGCTTGCGTTGCGTGACCGGTGCACTTCTGCTTGGGCGAATGTCAACGTCGGTTTGCGTGGTGTCAAAAAGCCGCATGCACGGTAGGTCTCGCGGGAGATCGGTAAGGCATGCGTGCAAACGACTCCATGTAGACCGAGTTCGGTCGCAGCACGTACCTCTCCTCGCGGAGAAGGTTGATGTCCTCATCGTTATGTCGGTTTACCGTCTCTTGGCGGACGGCTTTGCCTGTGCGTTGAAGTGCGGCCGTCTAGACGATGGGCATAATACATACA…
Nunez-Flores et al. 2021, Invertebrate Systematics, 2021	MT892719.1	NA	Animalia	Cnidaria	Anthozoa	Scleralcyonacea	Primnoidae	Thouarella	Thouarella amundseni	yes	0	NA	no	NA	NA	GAGAGTTAAAAAGTACGTGAAACCGTTGAAAGGGAAGCGAATAGAGATAGAAATTCCCCTGGCCGGATTCAGCCGATCCAGCATCGCCGCGTGCTTGGTTTCGATCTTTACAGACGAGCCTTGTACGCTTGCGTTGCGTGACCGGTGCACTTCCGCTTGGCGAATGTCAACGTCGGTTTGCGTGGCGTCAAAAAGCCGCATGCACGGTAGGTCTCACGGGATTGGTAAGGCATGCGTGCAAACAACTCCATGTAGACCGAGTTCTGTCGCAGCACGTACCTCTCCTCGCGGAGAAGGTTGATGTCCTTATGTCGGTTTACCGTCGCTTGGCGGACGGCTTTGCCTGTGCGTCAAGTGCGGCCGTTCAGACGATGGGCAAAATACATACAAGACGTGCTG…
Nunez-Flores et al. 2021, Invertebrate Systematics, 2021	MT892720.1	NA	Animalia	Cnidaria	Anthozoa	Scleralcyonacea	Primnoidae	Thouarella	Thouarella amundseni	yes	0	NA	no	NA	NA	GAGAGTTAAAAAGTACGTGAAACCGTTGAAAGGGAAGCGAATAGAGATAGAAATTCCCCTGGCCGGATTCAGCCGATCCAGCATCGCCGCGTGCTTGGTTTCGATCTTTACAGACGAGCCTTGTACGCTYGCGTTGCGTGACCGGTGCACTTCCGCTTGGCGAATGTCAACGTCGGTTTGCGTGGCGTCAAAAAGCCGCATGCACGGTAGGTCTCACGGGATYGGTAAGGCATGCGTGCAAACAACTCCATGTAGACCGAGTTCTGTCGCAGCACGTACCTCTCCTCGCGGAGAAGGTTGATGTCCTTATGTCGGTTTACCGTCGCTTGGCGGACGGCTTTGCCTGTGCGTCAAGTGCGGCCGTTCAGACGATGGGYWAAATACATACAAGACGTGCTG…
Nunez-Flores et al. 2021, Invertebrate Systematics, 2021	MT892721.1	NA	Animalia	Cnidaria	Anthozoa	Scleralcyonacea	Primnoidae	Thouarella	Thouarella amundseni	yes	0	NA	no	NA	NA	GAGAGTTAAAAAGTACGTGAAACCGTTGAAAGGGAAGCGAATAGAGATAGAAATTCCCCTGGCCGGATTCAGCCGATCCAGCATCGCCGCGTGCTTGGTTTCGATCTTTACAGACGAGCCTTGTACGCTCGCGTTGCGTGACCGGTGCACTTCCGCTTGGCGAATGTCAAYGTCGGTTTGCGTGGCGTCAAAAAGCCGCATGCACGGKAGGTCTCACGGGATTGGTAAGGCATGCGTGCAAACAACTCCATGTAGACCGAGTTCTGTCGCAGCACGTACCTCTCCTCGCGGAGAAGGTTGATGTCCTTATGTCGGTTTACCGTCGCTTGGCGGACGGCTTTGCCTGTGCGTCAAGTGCGGCCGTTCAGACGATGGGCWAAATACATACAAGACGTGCTG…
Nunez-Flores et al. 2021, Invertebrate Systematics, 2021	MT892722.1	NA	Animalia	Cnidaria	Anthozoa	Scleralcyonacea	Primnoidae	Thouarella	Thouarella amundseni	yes	0	NA	no	NA	NA	GAGAGTTAAAAAGTACGTGAAACCGTTGAAAGGGAAGCGAATAGAGATAGAAATTCCCCTGGCCGGATTCAGCCGATCCAGCATCGCCGCGTGCTTGGTTTCGATCTTTACAGACGAGCCTTGTACGCTTGCGTTGCGTGACCGGTGCACTTCCGCTTGGCGAATGTCAACGTCGGTTTGCGTGGCGTCAAAAAGCCGCATGCACGGTAGGTCTCACGGGATCGGTAAGGCATGCGTGCAAACAACTCCATGTAGACCGAGTTCTGTCGCAGCACGTACCTCTCCTCGCGGAGAAGGTTGATGTCCTTATGTCGGTTTACCGTCGCTTGGCGGACGGCTTTGCCTGTGCGTCAAGTGCGGCCGTTCAGACGATGGGYAAAATACATACAAGACGTGCTG…
Nunez-Flores et al. 2021, Invertebrate Systematics, 2021	MT892723.1	NA	Animalia	Cnidaria	Anthozoa	Scleralcyonacea	Primnoidae	Thouarella	Thouarella amundseni	yes	0	NA	no	NA	NA	GAGAGTTAAAAAGTACGTGAAACCGTTGAAAGGGAAGCGAATAGAGATAGAAATTCCCCTGGCCGGATTCAGCCGATCCAGCATCGCCGCGTGCTTGGTTTCGATCTTTACAGACGAGCCTTGTACGCTYGCGTTGCGTGACCGGTGCACTTCCGCTTGGCGAATGTCAAYGTCGGTTTGCGTGGCGTCAAAAAGCCGCATGCACGGTAGGTCTCACGGGATCGGTAAGGCATGCGTGCAAACAACTCCATGTAGACCGAGTTCTGTCGCAGCACGTACCTCTCCTCGCGGAGAAGGTTGATGTCCTTATGTCGGTTTACCGTCGCTTGGCGGACGGCTTTGCCTGTGCGTCAAGTGCGGCCGTTCAGACGATGGGCWAAATACATACAAGACGTGCTG…
Nunez-Flores et al. 2021, Invertebrate Systematics, 2021	MT892724.1	NA	Animalia	Cnidaria	Anthozoa	Scleralcyonacea	Primnoidae	Thouarella	Thouarella amundseni	yes	0	NA	no	NA	NA	GAGAGTTAAAAAGTACGTGAAACCGTTGAAAGGGAAGCGAATAGAGATAGAAATTCCCCTGGCCGGATTCAGCCGATCCAGCATCGCCGCGTGCTTGGTTTCGATCTTTACAGACGAGCCTTGTACGCTTGCGTTGCGTGACCGGTGCACTTCCGCTTGGCGAATGTCAACGTCGGTTTGCGTGGCGTCAAAAAGCCGCATGCACGGTAGGTCTCACGGGATTGGTAAGGCATGCGTGCAAACAACTCCATGTAGACCGAGTTCTGTCGCAGCACGTACCTCTCCTCGCGGAGAAGGTTGATGTCCTTATGTCGGTTTACCGTCGCTTGGCGGACGGCTTTGCCTGTGCGTCAAGTGCGGCCGTTCAGACGATGGGYWAAATACATACAAGACGTGCTG…
Nunez-Flores et al. 2021, Invertebrate Systematics, 2021	MT892725.1	NA	Animalia	Cnidaria	Anthozoa	Scleralcyonacea	Primnoidae	Thouarella	Thouarella amundseni	yes	0	NA	no	NA	NA	GAGAGTTAAAAAGTACGTGAAACCGTTGAAAGGGAAGCGAATAGAGATAGAAATTCCCCTGGCCGGATTCAGCCGATCCAGCATCGCCGCGTGCTTGGTTTCGATCTTTACAGACGAGCCTTGTACGCTTGCGTTGCGTGACCGGTGCACTTCCGCTTGGCGAATGTCAACGTCGGTTTGCGTGGCGTCAAAAAGCCGCATGCACGGTAGGTCTCACGGGATCGGTAAGGCATGCGTGCAAACAACTCCATGTAGACCGAGTTCTGTCGCAGCACGTACCTCTCCTCGCGGAGAAGGTTGATGTCCTTATGTCGGTTTACCGTCGCTTGGCGGACGGCTTTGCCTGTGCGTCAAGTGCGGCCGTTCAGACGATGGGCWAAATACATACAAGACGTGCTG…
Nunez-Flores et al. 2021, Invertebrate Systematics, 2021	MT892726.1	NA	Animalia	Cnidaria	Anthozoa	Scleralcyonacea	Primnoidae	Thouarella	Thouarella amundseni	yes	0	NA	no	NA	NA	GAGAGTTAAAAAGTACGTGAAACCGTTGAAAGGGAAGCGAATAGAGATAGAAATTCCCCTGGCCGGATTCAGCCGATCCAGCATCGCCGCGTGCTTGGTTTCGATCTTTACAGACGAGCCTTGTACGCTYGCGTTGCGTGACCGGTGCACTTCCGCTTGGCGAATGTCAAYGTCGGTTTGCGTGGCGTCAAAAAGCCGCATGCACGGTAGGTCTCACGGGATCGGTAAGGCATGCGTGCAAACAACTCCATGTAGACCGAGTTCTGTCGCAGCACGTACCTCTCCTCGCGGAGAAGGTTGATGTCCTTATGTCGGTTTACCGTCGCTTGGCGGACGGCTTTGCCTGTGCGTCAAGTGCGGCCGTTCAGACGATGGGCTAAATACATACAAGACGTGCTG…
Nunez-Flores et al. 2021, Invertebrate Systematics, 2021	MT892727.1	NA	Animalia	Cnidaria	Anthozoa	Scleralcyonacea	Primnoidae	Thouarella	Thouarella amundseni	yes	0	NA	no	NA	NA	GAGAGTTAAAAAGTACGTGAAACCGTTGAAAGGGAAGCGAATAGAGATAGAAATTCCCCTGGCCGGATTCAGCCGATCCAGCATCGCCGCGTGCTTGGTTTCGATCTTTACAGACGAGCCTTGTACGCTTGCGTTGCGTGACCGGTGCACTTCCGCTTGGCGAATGTCAAYGTCGGTKTGCGTGGCGTCAAAAAGCCGCATGCACGGTAGGTCTCACGGGATYGGTAAGGCATGCGTGCAAACAACTCCATGTAGACCGAGTTCTGTCGCAGCACGTACCTCTCCTCGCGGAGAAGGTTGATGTCCTTATGTCGGTTTACCGTCGCTTGGCGGACGGCTTTGCCTGTGCGTCAAGTGCGGCCGTTCAGACGATGGGCWAAATACATACAAGACGTGCTG…
Nunez-Flores et al. 2021, Invertebrate Systematics, 2021	MT892728.1	NA	Animalia	Cnidaria	Anthozoa	Scleralcyonacea	Primnoidae	Thouarella	Thouarella amundseni	yes	0	NA	no	NA	NA	GAGAGTTAAAAAGTACGTGAAACCGTTGAAAGGGAAGCGAATAGAGATAGAAATTCCCCTGGCCGGATTCAGCCGATCCAGCATCGCCGCGTGCTTGGTTTCGATCTTTACAGACGAGCCTTGTACGCTTGCGTTGCGTGACCGGTGCACTTCCGCTTGGCGAATGTCAACGTCGGTTTGCGTGGCGTCAAAAAGCCGCATGCACGGTAGGTCTCACGGGATTGGTAAGGCATGCGTGCAAACAACTCCATGTAGACCGAGTTCTGTCGCAGCACGTACCTCTCCTCGCGGAGAAGGTTGATGTCCTTATGTCGGTTTACCGTCGCTTGGCGGACGGCTTTGCCTGTGCGTCAAGTGCGGCCGTTCAGACGATGGGCAAAATACATACAAGACGTGCTG…
Nunez-Flores et al. 2021, Invertebrate Systematics, 2021	MT892729.1	NA	Animalia	Cnidaria	Anthozoa	Scleralcyonacea	Primnoidae	Thouarella	Thouarella pseudoislai	yes	0	NA	no	NA	NA	GAGAGTTAAAAAGTACGTGAAACCGTTGAAAGGGAAGCGAATAGAGATAGAAATTCCCCTGGCCGGATTCAGCCGATCCAGCATCGCCGCGTGCTTGGTTTCGATCTTTACAGACGAGCCTTGTACGCTTGCGTTGCGTGACCGGTGCACTTCCGCTTGGCGAATGTCAACGTCGGTTTGCGTGGCGTCAAAAAGCCGCATGCACGGTAGGTCTCACGGGATTGGTAAGGCATGCGTGCAAACAACTCCATGTAGACCGAGTTCTGTCGCAGCACGTACCTCTCCTCGCGGAGAAGGTTGATGTCCTTATGTCGGTTTACCGTCGCTTGGCGGACGGCTTTGCCTGTGCGTCAAGTGCGGCCGTTCAGACGATGGGCAAAATACATACAAGACGTGCTG…
Nunez-Flores et al. 2021, Invertebrate Systematics, 2021	MT892730.1	NA	Animalia	Cnidaria	Anthozoa	Scleralcyonacea	Primnoidae	Thouarella	Thouarella pseudoislai	yes	0	NA	no	NA	NA	GAGAGTTAAAAAGTACGTGAAACCGTTGAAAGGGAAGCGAATAGAGATAGAAATTCCCCTGGCCGGATTCAGCCGATCCAGCATCGCCGCGTGCTTGGTTTCGATCTTTACAGACGAGCCTTGTACGCTTGCGTTGCGTGACCGGTGCACTTCCGCTTGGCGAATGTCAACGTCGGTTTGCGTGGCGTCAAAAAGCCGCATGCACGGTAGGTCTCACGGGATTGGTAAGGCATGCGTGCAAACAACTCCATGTAGACCGAGTTCTGTCGCAGCACGTACCTCTCCTCGCGGAGAAGGTTGATGTCCTTATGTCGGTTTACCGTCGCTTGGCGGACGGCTTTGCCTGTGCGTCAAGTGCGGCCGTTCAGACGATGGGCAAAATACATACAAGACGTGCTG…
Nunez-Flores et al. 2021, Invertebrate Systematics, 2021	MT892731.1	NA	Animalia	Cnidaria	Anthozoa	Scleralcyonacea	Primnoidae	Thouarella	Thouarella sp.	yes	0	NA	no	NA	NA	GAGAGTTAAAAAGTACGTGAAACCGCTGAAAGGGAAGCGAATAGAGATAGAAATTCCCCTGGCCGGATTCAGCCGCTCCAGCATCGTCGCGTGCTTGGTTTCGATCTTTACAGACGAGCCTTGTACGCATGCGTTGCGTGACCGGTGCACTTCCGCTTGGCGAATGTCAACGTCGATTTGCGTGGCGTCAAAAAGCCGCATGCACGGTAGGTCTCACGGGATCGGTAAGGCTTGCGTGCAAACAACTCCATGTAGACCGAGTTCTGTCGCAGCACGTACCTCTCCTGGCGGAGAAGGTTGATGTCCTCATCGTTATGTCGGTTTTCCGTCGCTTGGCGGACGGCTTTGCCTGTGCGTYAAGTGCGGCCGTTCAGACGATGGGCAAAATACATACACGAC…
Nunez-Flores et al. 2021, Invertebrate Systematics, 2021	MT892732.1	NA	Animalia	Cnidaria	Anthozoa	Scleralcyonacea	Primnoidae	Thouarella	Thouarella sp.	yes	0	NA	no	NA	NA	GAGAGTTAAAAAGTACGTGAAACCGCTGAAAGGGAAGCGAATAGAGATAGAAATTCCCCTGGCCGGATTCAGCCGCTCCAGCATCGTCGCGTGCTTGGTTTCGATCTTTACAGACGAGCCTTGTACGCATGCGTTGCGTGACCGGTGCACTTCCGCTTGGCGAATGTCAACGTCGGTTTGCGTGGCGTCAAAAAGCCGCATGCACGGTAGGTCTCACGGGATCGGTAAGGCTTGCGTGCAAACAACTCCATGTAGACCGAGTTCTGTCGCAGCACGTACCTCTCCTGGCGGAGAAGGTTGATGTCCTCATCGTTATGTCGGTTTTCCGTCGCTTGGCGGACGGCTTTGCCTGTGCGTCAAGTGCGGCCGTTCAGACGATGGGCAAAATACATACACGAC…
Nunez-Flores et al. 2021, Invertebrate Systematics, 2021	MT892733.1	NA	Animalia	Cnidaria	Anthozoa	Scleralcyonacea	Primnoidae	Thouarella	Thouarella dolichoespinosa	yes	0	NA	no	NA	NA	TAAAAAGTACGTGAAACCGTTGAAAGGGAAGCGAATAGAGATAGAAATTCCCCTTGCCGGATTCAGCCGCTCCAGCATCGCCGCGTGCTTGGTTTCGATCTTTACAGACGAGCCTTGTACGCATGCGTTGCGTGACCGGTGCACTTCCGCTTGGCGAATGTCAACGTCGGTTTGCGTGGCGTCAAAAAGCCGCATGCACGGTAGGTCTCACGGGATCGGTAAGGCTTGCGTGCAAACAACTCCATGTAGACCGAGTTCTGTCGCAGCACGTACCTCTCTTCGCGGAGAAGGTTGATGTCCTCATCGTTATGTCGGTTTTCCGTCGCTTGGCGGACGGCTTTGCCTGTGCGTCAAGTGCGGCCGTTCAGACGATGGGCAAAATACATACACGACGTGCTG…
Cordeiro et al. 2021, Invertebrate Systematics	MW403904.1	NA	Animalia	Cnidaria	Anthozoa	Malacalcyonacea	Plexaurellidae	Plexaurella	Plexaurella grandiflora	yes	0	NA	no	NA	NA	GAGAGTTAAAAAGTACGTGAAACCGTTGAAAGGGAAGCGAATGGAGTTAGCAATTCGCCCTGCCAGATTCAGCCGTTCGTGCTTCGCGACGTGCGCGTGCTCGATTCACACTTGGGCGAGCCGTATACGGATGCGACGTGCTGGCGGCGCACTTCTGGCTAAGCGAGCGTCAGCGTCGGTTGTCGACGGGCGACAAAGGACGAGAGGAAGGTGAGCCGGTCTTCACGGCCGGTTGTTAAGCCTCTTGCTCGCATAGCTCGACGGCGACCGTGGCTCTGCGACGCGTGCCTAGCTGGTGACTCTTGTGATCGGCTCGGCTGTCGACCGTGGCGGACGGCATGCCTGTGCGTTCCAAACTGCTGCCGGTCGATCGCATGATGTTCACACAATACGCGTCGA…
Cordeiro et al. 2021, Invertebrate Systematics	MW403905.1	NA	Animalia	Cnidaria	Anthozoa	Malacalcyonacea	Plexaurellidae	Plexaurella	Plexaurella nutans	yes	0	NA	no	NA	NA	GAGAGTTAAAAAGTACGTGAAACCGTTGAAAGGGAAGCGAATGGAGTTAGCAATTCGCCCTGCCAGATTCAGCTGTTCGTGCTTCGTGACGTGCGCGTGCTCGATCCACTCTTGGGCGAGCCGTGTACGGACGCGACGTGCTGGCGGCGCACTTCTGGCTAAGCGAGCGTCAGCGTCGGTTGTCGACGGGCGACAAGGACGAGAGGAAGGTGAGCCGGTCTTCACGGCCGGTTGTTAAGCCTCTTGATCGCATAGCTCGACGGCGACCGTGGCTCTGCGACGCGTGCCTAGCTGGTGACTCGTGTGATCGGTTCGGCTGTCGACCGTGGCGGACGGCATGCCTGTGCGTTCCAAACTGCTGCCGGTCGATCGCATGATGTTCGCACAATACGCGTCGAA…
Cordeiro et al. 2021, Invertebrate Systematics	MW403906.1	NA	Animalia	Cnidaria	Anthozoa	Malacalcyonacea	Plexaurellidae	Plexaurella	Plexaurella grandiflora	yes	0	NA	no	NA	NA	GAGAGTTAAAAAGTACGTGAAACCGTTGAAAGGGAAGCGAATGGAGTTAGCAATTCGCCCTGCCAGATTCAGCCGTTCGTGCTTCGCGACGTGCGCGTGCTCGATTCACACTTGGGCGAGCCGTATACGGATGCGACGTGCTGGCGGCGCACTTCTGGCTAAGCGAGCGTCAGCGTCGGTTGTCGACGGGCGACAAAGGACGAGAGGAAGGTGAGCCGGTCTTCACGGCCGGTTGTTAAGCCTCTTGCTCGCATAGCTCGACGGCGACCGTGGCTCTGCGACGCGTGCCTAGCTGGTGACTCGTGTGATCGGCTCGGCTGTCGACCGTGGCGGACGGCATGCCTGTGCGTTCCAAACTGCTGCCGGTCGATCGCATGATGTTCACACAATACGCGTCGA…
Cordeiro et al. 2021, Invertebrate Systematics	MW403907.1	NA	Animalia	Cnidaria	Anthozoa	Malacalcyonacea	Plexaurellidae	Plexaurella	Plexaurella obesa	yes	0	NA	no	NA	NA	GAGAGTTAAAAAGTACGTGAAACCGTTGAAAGGGAAGCGAATGGAGTTAGCAATTCGCCCTGCCAGATTCAGCCGTTCGTGCTTCGCGACGTGCGCGTGCTCGATTCACTCTTGGGCGAGCCGTGTACGGACGCGACGTGCTGGCGGCGCACTTCTGGCTAAGCGAGCGTCAGCGTCGGTTGTCGACGGGCGACAAGGACGAGAGGAAGGTGAGCCGGCCTTCACGGCCGGTTGTTAAGCCTCTTGCTCGCATAGCTCGACGGCGACCGTGGCTCTGCGACGCGTGCCTAGCTGGTGACTCGTGTGATCGGCTCGGCTGTCGACCGTGGCGGACGGCATGCCTGTGCGTTCCAAACTGCTGCCGGTCGATCGCATGATGTTCACACAATACGTGTCGAA…
Thoma et al., GenBank - unpublished, submitted 2009	MW403908.1	NA	Animalia	Cnidaria	Anthozoa	Malacalcyonacea	Gorgoniidae	Leptogorgia	Leptogorgia cf. palma	yes	0	NA	no	NA	NA	GAGAGTTAAAAAGTACGTGAAACCGTTGAAAGGGAAGCGAATGGAGTTAGCAATTCGCCCTGCTAGATTCAGTTGTTCGTGCTTCGCGACGTGCGCGCTCTCGATCCGCATGGACGAGACGTGTACGGGTGCGATGTGCGGGCGGCGCACTTCTGGCGAGCGAGCGTCAGCGTCGGTTGTCGACGGGCGACAAGGACATGAGGAAGGTGAGCTGGCCTTTACGGCCGGTTGTTAAGCCTCTTGCTCGCATAGCCCGACGGCGACCGTGGCTCTGCGACGCGTGCCTGGCTGGTGACTCGTACGATCGGTTCGGCATGTCGACCGTGGCGGACGGCACGCCTGTGCGCTCAAACTGCTGCCGGTCGATCGCATGATGTTCACACACTACGCGTCGAGGAT…
Cordeiro et al. 2021, Invertebrate Systematics	MW403909.1	NA	Animalia	Cnidaria	Anthozoa	Malacalcyonacea	Gorgoniidae	Leptogorgia	Leptogorgia barnardi	yes	0	NA	no	NA	NA	GAGAGTTAAAAAGTACGTGAAACCGTTGAAAGGGAAGCGAATGGAGTTAGCAATTCGCCCTGCTAGATTCAGTTGTTCGTGCTTCGCGACGTGCGCGCTCTCGATCCGCATGGACGAGACGTGTACGGGTGCGATGTGCGGGCGGCGCACTTCTGGCGAGCGAGCGTCAGCGTCGGTTGTCGACGGGCGACAAGGACATGAGGAAGGTGAACTGGCTTTACGGCTGGTTGTTAAGCCTCTTGCTCGCATAGCCCGACGGCGACCGTGGCTCTGCGACGCGTGCCTGGCTGGTGACTCGTACGATCGGTCCGGCATGTCGACCGTGGCGGACGGCACGCCTGTGCGCTCAAACTGCTGCCGGTCGATCGCATGATGTTCACACACTACGCGTCGAGGATG…
Cordeiro et al. 2021, Invertebrate Systematics	MW403910.1	NA	Animalia	Cnidaria	Anthozoa	Malacalcyonacea	Gorgoniidae	Leptogorgia	Leptogorgia gilchristi	yes	0	NA	no	NA	NA	GAGAGTTAAAAAGTACGTGAAACCGTTGAAAGGGAAGCGAATGGAGTTAGCAATTCGCCCTGCTAGATTCAGTTGTTCGTGCTTCGCGACGTGCGCGCTCTCGATCCGCATGGACGAGACGTGTACGGGTGCGATGTGCGGGCGGCGCACTTCTGGCGAGCGAGCGTCAGCGTCGGTTGTCGACGGGCGATAAGGACATGAGGAAGGTGAACTGGCCTTTACGGCCGGTTGTTAAGCCTCTTGCTCGCATAGCCCGACGGCGACCGTGGCTCTGCGACGCGTGCCTGGCTGGTGACTCGTACGATCGGTCCGGCATGTCGACCGTGGCGGACGGCACGCCTGTGCGCTCAAACTGCTGCCGGTCGATCGCATGATGTTCACACACTACGCGTCGAGGAT…
Xu et al. 2021, J. Oceanol. Limnol.	MW418372.1	NA	Animalia	Cnidaria	Anthozoa	Scleralcyonacea	Chrysogorgiidae	Chrysogorgia	Chrysogorgia pinniformis	yes	0	NA	no	NA	NA	GAGAGTTAAAAAGTACGTGAAACCGTTGGAAGGGAAGCGAATGGAGTCGGCAATTCGCCTCGCCTGATTCATCCACTCTCATTCCGCAACGTGCTCTCTCGCGACCTGTTCGCAGGCGCGAATTGCGCGGTCGCGTTACGCGTGTGGTGCACTTCGGCGGGCGAGCGTCAACGCCAGTTAACCGCGAGTTACAAAGCAGCAAGCACGGTACATTCTTCGGAATGGGTAAGTCTTGCCTGCGCACGACTCGCGCGAGACTGTCCTCTGTCGCAGCGTGTCCCTCTGCTCATGAGGCTGCTGCCTTCGTTGTCGATCCGGTTGTGCTGTCCGGCGGACGGCTGTGCGCCTGTGCGTCGGCGGTGCCGCTGATCAACTGACCTAGTCGCAGACACGACACGC…
Xu et al. 2021, J. Oceanol. Limnol.	MW418373.1	NA	Animalia	Cnidaria	Anthozoa	Scleralcyonacea	Chrysogorgiidae	Chrysogorgia	Chrysogorgia carolinensis	yes	0	NA	no	NA	NA	GAGAGTTAAAAAGTACGTGAAACCGTTGGAAGGGAAGCGAATGGAGTCGGCAATTCGCCTTGCCTGATTCATCCGCACTCATTCTGCAACGTGCTCTCTCGCGACCTGTCCCCAGGCACGGATTGCGCGGCCGCGGTTCGGGTGTGGTGCACTTCGGCGGGCGAACGTCAACGCCAGTCAACCGTGAGTCACAAAGCTGCAAGCTCGGTACATTCTTCGGAATGGGTAAGACTTGCGTGCGTACGACTCTCGCGAGACTGTCCTCTGTCGCAGCGTGTTCCTTCCCGGCTTGCCGGTGCAGGCTGTTGCCTTTGTTGTCGATCCGGCTGTGCTGTCCGGCGGACGGCTGCGCGCCTGTGCGTCGGCGGTGCCGCTGATCAACTGACTTAGAACGCAGAC…
Xu et al. 2021, J. Oceanol. Limnol.	MW418374.1	NA	Animalia	Cnidaria	Anthozoa	Scleralcyonacea	Chrysogorgiidae	Chrysogorgia	Chrysogorgia carolinensis	yes	0	NA	no	NA	NA	GAGAGTTAAAAAGTACGTGAAACCGTTGGAAGGGAAGCGAATGGAGTCGGCAATTCGCCTTGCCTGATTCATCCGCACTCGTTCTGCAACGTGCTCTCTCGCGACCTGTCCCCAGGCACGGATTGCGCGGCCGCGGTTCGGGTGTGGTGCACTTCGGCGGGCGAACGTCAACGCCAGTCAACCGTGAGTCACAAAGCTGCAAGCTCGGTACATTCTTCGGAATGGGTAAGACTTGCGTGCGTACGACTCTCGCGAGACTGTCCTCTGTCGCAGCGTGTTCCTTCCCGGCTTGCCGGTGCAGGCTGTTGCCTTTGTTGTCGATCCGGCTGTGCTGTCCGGCGGACGGCTGCGCGCCTGTGCGTCGGCGGTGCCGCTGATCAACTGACTTAGAACGCAGAC…
Xu et al. 2021, J. Oceanol. Limnol.	MW418375.1	NA	Animalia	Cnidaria	Anthozoa	Scleralcyonacea	Chrysogorgiidae	Chrysogorgia	Chrysogorgia carolinensis	yes	0	NA	no	NA	NA	GAGAGTTAAAAAGTACGTGAAACCGTTGGAAGGGAAGCGAATGGAGTCGGCAATTCGCCTTGCCTGATTCATCCGCACTCATTCTGCAACGTGCTCTCTCGCGACCTGTCCCCAGGCACGGATTGCGCGGCCGCGGTTCGGGTGTGGTGCACTTCGGCGGGCGAACGTCAACGCCAGTCAACCGTGAGTCACAAAGCTGCAAGCTCGGTACATTCTTCGGAATGGATAAGACTTGCGTGCGTACGACTCTCGCGAGACTGTCCTCTGTCGCAGCGTGTTCCTTCCCGGCTTGCCGGTGCAGGCTGTTGCCTTTGTTGTCGATCCGGCTGTGCTGTCCGGCGGACGGCTGCGCGCCTGTGCGTCGGCGGTGCCGCTGATCAACTGACTTAGAACGCAGAC…
Xu et al. 2021, J. Oceanol. Limnol.	MW418376.1	NA	Animalia	Cnidaria	Anthozoa	Scleralcyonacea	Chrysogorgiidae	Chrysogorgia	Chrysogorgia carolinensis	yes	0	NA	no	NA	NA	GAGAGTTAAAAAGTACGTGAAACCGTTGGAAGGGAAGCGAATGGAGTCGGCAATTCGCCTTGCCTGATTCATCCACTCTCGTGCTGCAACGTGCTCTCTCGCGACCTGTCCCCAGGCACGGATTGCGCGGTCGTGGTACGGCTGTGGTGCACTTCGGCGGGCGTACGTCAACGCCAGTCAACCGTGAGTCACAAAGCTGCAAGCTCGGTACATTCTTCGGAATGGGTAAGACTTGCGTGCGTACGACTCTCGCGAGACTGTCCTCTGTCGCAGCGTGTTCCTTCCCGGCTTGCCGGTGCAGGCTGTTGCCTTTGTTGTCGATCCGGCTGTGCTGTCCGGCGGACGGCTGCGCGCCTGTGCGTCGGCGGTGCCGCTGATCAACTGACTTAGAACGCAGAC…
Xu et al. 2021, J. Oceanol. Limnol.	MW418377.1	NA	Animalia	Cnidaria	Anthozoa	Scleralcyonacea	Chrysogorgiidae	Chrysogorgia	Chrysogorgia varians	yes	0	NA	no	NA	NA	GAGAGTTAAAAAGTACGTGAAACCGCTGGAAGGGAAGCGAATGGAGTCGGCAATTCGCCCTGCCTGATTCATCCACTCTCGTTCTACAACCCGCTTTCTCGCGACCTGTTCCCAGGCACGGTTTGCGCGGTCGTCGTCACGGGTGTGGTGCACTTCGGCGGGCGAACGTCAACGCCAGTCAACCGCGCGTCACAAACTCGCAAGCTCGGTACATTCTTCGGAATGGGTAAGTCTTGCGTGTGCACGACGCGCGAGAGACTGTCCTCACTCGCAGCGTGTGTCCCCTACGGGCTGCTGCCTTTGTCGTCGATCCGGCTGTGCTGTCCAGCGGACGGCTGTACGCCTGTGCGTCGGCAGTGCCGCTGATCGACAGACCTAAGATGCAGACACCACACGCTC…
Xu et al. 2021, J. Oceanol. Limnol.	MW418378.1	NA	Animalia	Cnidaria	Anthozoa	Scleralcyonacea	Chrysogorgiidae	Chrysogorgia	Chrysogorgia varians	yes	0	NA	no	NA	NA	GAGAGTTAAAAAGTACGTGAAACCGCTGGAAGGGAAGCGAATGGAGTCGGCAATTCGCCCTGCCTGATTCATCCACTCTCGTTCTACAACCCGCTCTCTCGCGACCTGTTCCCAGGCACGGTTTGCGCGGTCGTGGTCACGGGTGTGGTGCACTTCGGCGGGCGAACGTCAACGCCAGTCAACCGCGCGTCACAAACTCGCAAGCTCGGTACATTCTTCGGAATGGGTAAGTCTTGCGTGTGCACGACGCGCGAGAGACTGTCCTCACTCGCAGCGTGTGTCCCCTACGGGCTGCTGCCTTTGTTGTCGATCCGGCTGTGCTGTCCAGCGGACGGCTGTACGCCTGTGCGTCGGCAGTGCCGCTGATCGACAGACTGAAGATGCAGACACCACACGCTC…
Xu et al. 2021, J. Oceanol. Limnol.	MW418379.1	NA	Animalia	Cnidaria	Anthozoa	Scleralcyonacea	Chrysogorgiidae	Chrysogorgia	Chrysogorgia varians	yes	0	NA	no	NA	NA	GAGAGTTAAAAAGTACGTGAAACCGCTGGAAGGGAAGCGAATGGAGTCGGCAATTCGCCCTGCCTGATTCATCCACTCTCGTTCTACAACCCGCTCTCTCGCGACCTGTTCCCAGGCACGGTTTGCGCGGTCGTGGTCACGGGTGTGGTGCACTTCGGCGGGCGAACGTCAACGCCAGTCAACCGCGCGTCACAAACTCGCAAGCTCGGTACATTCTTCGGAATGGGTAAGTCTTGCGTGTGCACGACGCGCGAGAGACTGTCCTCACTCGCAGCGTGTGTCCCCTACGGGCTGCTGCCTTTGTTGTCGATCCGGCTGTGCTGTCCAGCGGACGGCTGTACGCCTGTGCGTCGGCAGTGCCGCTGATCGACAGACTGAAGATGCAGACACCACACGCTC…
Xu et al. 2021, J. Oceanol. Limnol.	MW418380.1	NA	Animalia	Cnidaria	Anthozoa	Scleralcyonacea	Chrysogorgiidae	Chrysogorgia	Chrysogorgia varians	yes	0	NA	no	NA	NA	GAGAGTTAAAAAGTACGTGAAACCGCTGGAAGGGAAGCGAATGGAGTCGGCAATTCGCCCTGCCTGATTCATCCACTCTCGTTCTACAACCCGCTCTCTCGCGACCTGTTCCCAGGCACGGTTTGCGCGGTCGTGGTCACGGGTGTGGTGCACTTCGGCGGGCGAACGTCAACGCCAGTCAACCGCGCGTCACAAACTCGCAAGCTCGGTACATTCTTCGGAATGGGTAAGTCTTGCGTGTGCACGACGCGCGAGAGACTGTCCTCACTCGCAGCGTGTGTCCCCTACGGGCTGCTGCCTTTGTTGTCGATCCGGCTGTGCTGTCCAGCGGACGGCTGTACGCCTGTGCGTCGGCAGTGCCGCTGATCGACAGACTGAAGATGCAGACACCACACGCTC…
Xu et al. 2021, J. Oceanol. Limnol.	MW418381.1	NA	Animalia	Cnidaria	Anthozoa	Scleralcyonacea	Chrysogorgiidae	Chrysogorgia	Chrysogorgia varians	yes	0	NA	no	NA	NA	GAGAGTTAAAAAGTACGTGAAACCGCTGGAAGGGAAGCGAATGGAGTCGGCAATTCGCCCTGCCTGATTCATCCACTCTCGTTCTACAACTCGCTCTCTCGCGACCTGTTCCCAGGCACGGTTTGCGCGGTCGTGGTCACGGGTGTGGTGCACTTCGGCGGGCGAACGTCAACGCCAGTCAACCGCGCGTCACAAACTCGCAAGCTCGGTACATTCTTCGGAATGGGTAAGTCTTGCGTGTGCACGACGCGCGAGAGACTGTCCTCACTCGCAGCGTGTGTCCCCTACGGGCTGCTGCCTTTGTTGTCGATCCGGCTGTGCTGTCCAGCGGACGGCTGTACGCCTGTGCGTCGGCAGTGCCGCTGATCGACAGACTGAAGATGCAGACACCACACGCTC…
Xu et al. 2021, J. Oceanol. Limnol.	MW418382.1	NA	Animalia	Cnidaria	Anthozoa	Scleralcyonacea	Chrysogorgiidae	Chrysogorgia	Chrysogorgia varians	yes	0	NA	no	NA	NA	GAGAGTTAAAAAGTACGTGAAACCGCTGGAAGGGAAGCGAATGGAGTCGGCAATTCGCCCTGCCTGATTCATCCACTCTCGTTCGACAACCCGCTCTCTCGCGACCTGTTCCCAGGCACGGTTTGCGCGGTCGTCGTCACGGGTGTGGTGCACTTCGGCGGGCGAACGTCAACGCCAGTCAACCGCGCGTCACAAACTCGCAAGCTCGGTACATTCTTCGGAATGGGTAAGTCTTGCGTGTGCACGACGCGTGAGAGACTGTCCTCACTCGCAGCGTGTGTCCCCTACGGGCTGCTGCCTTTGTCGTCGATCCGGCTGTGCTGTCCAGCGGACGGCTGTACGCCTGTGCGTCGGCAGTGCCGCTGATCGACTGACCTAAGATGCAGACACCACACGCTC…
Xu et al. 2021, J. Oceanol. Limnol.	MW418383.1	NA	Animalia	Cnidaria	Anthozoa	Scleralcyonacea	Chrysogorgiidae	Chrysogorgia	Chrysogorgia varians	yes	0	NA	no	NA	NA	GAGAGTTAAAAAGTACGTGAAACCGCTGGAAGGGAAGCGAATGGAGTCGGCAATTCGCCCTGCCTGATTCATCCACTCTCGTTCGACAACCCGCTCTCTCGCGACCTGTTCCCAGGCACGGTTTGCGCGGTCGTCGTCACGGGTGTGGTGCACTTCGGCGGGCGAACGTCAACGCCAGTCAACCGCGCGTCACAAACTCGCAAGCTCGGTACATTCTTCGGAATGGGTAAGTCTTGCGTGTGCACGACGCGCGAGAGACTGTCCTCACTCGCAGCGTGTGTCCCCTACGGGCTGCTGCCTTTGTCGTCGATCTGGCTGTGCTGTCCAGCGGACGGCTGTACGCCTGTGCGTCGGCAGTGCCGCTGATCGACAGACCTAAGATGCGGACACCACACGCTC…
Xu et al. 2021, J. Oceanol. Limnol.	MW418384.1	NA	Animalia	Cnidaria	Anthozoa	Scleralcyonacea	Chrysogorgiidae	Chrysogorgia	Chrysogorgia varians	yes	0	NA	no	NA	NA	GAGAGTTAAAAAGTACGTGAAACCGCTGGAAGGGAAGCGAATGGAGTCGGCAATTCGCCCTGCCTGATTCATCCACTCTCGTTCGACAACCCGCTCTCTCGCGACCTGTTCCCAGGCACGGTTTGCGCGGTCGTCGTCACGGGTGTGGTGCACTTCGGCGGGCGAACGTCAACGCCAGTCAACCGCGCGTCACAAACTCGCAAGCTCGGTACATTCTTCGGAATGGGTAAGTCTTGCGTGTGCACGACGCGCGAGAGACTGTCCTCACTCGCAGCGTGTGTCCCCTACGGGCTGCTGCCTTTGTCGTCGATCCGGCTGTGCTGTCCAGCGGACGGCTGTACGCCTGTGCGTCGGCAGTGCCGCTGATCGACAGACCTAAGATGCAGACACCACACGCTC…
Xu et al. 2021, J. Oceanol. Limnol.	MW418385.1	NA	Animalia	Cnidaria	Anthozoa	Scleralcyonacea	Chrysogorgiidae	Chrysogorgia	Chrysogorgia varians	yes	0	NA	no	NA	NA	GAGAGTTAAAAAGTACGTGAAACCGCTGGAAGGGAAGCGAATGGAGTCGGCAATTCGCCCTGCCTGATTCATCCACTCTCGTTCGACAACCCGCTCTCTCGCGACCTGTTCCCAGGCACGGTTTGCGCGGTCGTCGTCACGGGTGTGGTGCACTTCGGCGGGCGAACGTCAACGCCAGTCAACCGCGCGTCACAAACTCGCAAGCTCGGTACATTCTTCGGAATGGGTAAGTCTTGCGTGTGCACGACGCGTGAGAGACTGTCCTCACTCGCAGCGTGTGTCCCCTACGGGCTGCTGCCTTTGTCGTCGATCCGGCTGTGCTGTCCAGCGGACGGCTGTACGCCTGTGCGTCGGCAGTGCCGCTGATCGACAGACCTAAGATGCAGACACCACACGCTC…
Samimi-Namin et al. 2022, Diversity	MW473676.1	NA	Animalia	Cnidaria	Anthozoa	Malacalcyonacea	Tubiporidae	Stragulum	Stragulum bicolor	yes	0	NA	no	NA	NA	GAGAGTTAAAAAGTACGTGAAACCGTTGAAAGGGAAGCGAATGGAGTTAGCAATTCGCCCTGTCAGATTCAGCCGCTCGCGCTTCGCGACGCGCGCGTTCTCGATCCGCATGGACGAGGCGCGTGCGGACGCGTCGTGCGGACGGCGCACTTCTGGCGGGCGAGCGTCAGCGTCGGTTGTCGCCGGGCGAAAAGGACGCGAGGAAGGTGGGCCGTCCTTCGGGACGGTTGTTAAGCCTCGCGCTCGTACGGCTCGACGGCGACCGTGGCTCTCGTTTCATCGCGAGAGGCGACGCGTGCCTTGGCTGGCGACTCGTGCGATCGGTCCGACATGTCGACTGTGGCGGACGGCACGCCTGTGCGCTCGAACCGCTGCCGGTCGTTCGCGCGATGTTCGCAC…
Frometa et al. 2021, Diversity	MW931724.1	NA	Animalia	Cnidaria	Anthozoa	Malacalcyonacea	Paramuriceidae	Acanthogorgia	Acanthogorgia sp.	NA	NA	NA	no	NA	NA	AAACCGTTGAAAGGGAAGCGAATGGAGTTAGCAATTCGCCCCGCCAGATTCAGTTGCTCGCACGTCGCGACGTACGCGCTCTCGATCCGCATGGACGAGACGTGTGCGGGTGCGACGTGCGGTCTGCGCACTTCTGGCGAGCGAGCGTCAGCGTCGGTTGTCGACGGGCGACAAGGACGCGGGGAAGGTGCGCCGGCCCTCGCGGCTGGCCGTTATAGCCCCGCGATCGCATAGCTCGACGGCGACCGTGGCTCTGCGACGCGTGCCTGGCTGGCGACTCGAACGATCGGTCCGGCATGTCGACCGTGGCGGACGGCACGCCTGTGCGCTCGAACTGCTGCCGGCCGATCGGACGATGTTCGCACACTACGCGTCGAGGATGCTGACGGCCATACGGCT…
Frometa et al. 2021, Diversity	MW931725.1	NA	Animalia	Cnidaria	Anthozoa	Malacalcyonacea	Plexauridae	Swiftia	Swiftia exserta	NA	NA	NA	no	NA	NA	AAACCGTTGAAAGGGAAGCGAATGGAGTTAGCAATTTGCCCANRSTCAGATTCAGCCGKTCGTTCCTCGCCACGTTCGCGTTCCCGATCCCCGTTGTGGACGGGACGTGCACGGATGCGATGTGCGGCCGGCGCACTTCTGGCGGGCAAGCGTNAGCRTCGGTTGCCGACGGGTGTGAAGGACTCGAGGAAGGTGGGCCGGTCGTCATGGTCGGTTGTTAAGCCTCGAGCTCGCACGACCCGTTTCCGACCGTGGCCRTATCAGGTTGCGACGCGTGCCTGGCTGGCRACTCGTACGATCGATCCGGCATGTCGACCGTGGCGGACGGCACGCCTGTGCGCTCGAACTGCTGCCGGTCGATCGGACGATGTTCGCACACTACGCGTCGAAGATGCTGAC…
Frometa et al. 2021, Diversity	MW931726.1	NA	Animalia	Cnidaria	Anthozoa	Malacalcyonacea	Gorgoniidae	Callistephanus	Callistephanus pallida	NA	NA	NA	no	NA	NA	AAACCGTTGAAAGGGAAGCGAATGGAGTTAGCAATTCGCCCTGCCAGATTCAGTTGTCCGTGCTTCGCGACGTGCGCGCTCTCGATCCGCATGGACGAGACGTGTGCGGATGCGATGCGTGGGCGGCGCACTTCTGGCGAGCGAGCGTCAGCGTCGGTTGTCGACGGGCGACAAGGACATGAGGAAGGTGAACCGACCTTTACGGCCGGTTGTTAAGCCTCTTGCTCTCATAGCCCGACGGCGACCGTGGYTCTGCGACGCGTGCCTCGCTGGTGACTCTTACGATCGGTCCGGCATGTCGACCGTGGCGGACGGCACGCCTGTGCGCTCAAACTGCTGCCGGTCGATCGAATGATGCTCACACACTACGCGTCGAAGATGCTGACGGCCATACGGCTC…
Frometa et al. 2021, Diversity	MW931727.1	NA	Animalia	Cnidaria	Anthozoa	Malacalcyonacea	Pterogorgiidae	Stenogorgia	Stenogorgia casta	yes	0	NA	no	NA	NA	GAGAGTTAAAAAGTACGTGAAACCGTTGAAAGGGAAGCGAATGGAGTTAGCAATTCGCCCTGCCAGATTCAGCTGCTCGTGCTTCGCGACGTGCGCGCTCTCGATCCGCATGGACGAGACGTGTGTGGGTGCGATGTGCAAACGGCGCACTTCTGGCGAGCGAGCGTCAGCGTCGGTTGTCGACGGGGGACAAGGACACAGGGAAGGTGGATCAGCCAACTTGGCCGATTGTTAAGCCTTGTGATCACATAGCCCGACGGCGACCGTGGCTCTGCGACGCGTGCCTGGCTGGCGACTCGAACGGATCGGTCCGGCATGTCGACTGGGCGGACGAGACTTCTCTGTGCGCTCAAACTGCTGCCGGTCGAACGGACGATGTTCGCACACTACGCGTCGAGG…
Sikorskaya et al. 2021, Phytochemistry	MZ189996.1	NA	Animalia	Cnidaria	Anthozoa	Malacalcyonacea	Astrogorgiidae	Astrogorgia	Astrogorgia rubra	no	NA	NA	no	NA	NA	GAGAGTTAAAAAGTACGTGAAACCGTTGAAAGGGAAGCGAATGGAGTTAGCAATTCGCCCTGCCAGATTCAGTTGCTCGTGCCTCGCGACGTGCGCGCTCTCGATCCGCATGGACGAGACGTGTGCGGGCGCGGCGTGCGCTCGGCGCACTTCTGGCGAGCGAGCGTCAGCGTCGGTTGCCGGCGGGCGACAAGGACACGAGGAAGGTGGACCGGCCTTTACGGTCGGTTGTTAAGCCTCGTGCTCGCATAGCCCGACGGCGACCGTGGCCCTGCGACGCGTGCCTGGCTGGTGACTCGTACGATCGGTCTGGCATAACGACCGTGGCGGACGGCACGCCTGTGCGCTCGAACCGCTGCCGGTCGATCGAACGATGTTCGCACACTACGCGTCTAGGAT…
Sikorskaya et al. 2021, Phytochemistry	MZ189997.1	NA	Animalia	Cnidaria	Anthozoa	Malacalcyonacea	Paramuriceidae	Menella	Menella sp.	yes	0	NA	no	NA	NA	GAGAGTTAAAAAGTACGTGAAACCGTTGAAAGGGAAGCGAATGGAGTTAGCAATTCGCCCTGCCAGATTCAGCAGCTCGCGCGCCGCGACGCACGCGCTCTCGATCCGCATGGACGAGACGTGCGCGGGTGCGGCGCGTGGTCTGCGCACTTCTGGCGAGCGAGCGTCAGCGTCGGTTGCCGACGTGCTACAAGGACGCGGGGAAGGTGGACAGGCCCTCGTGGCCTGTTGTTATAGCCCCGCGCTCGCATGGCTCGACGGCGACCGAGGCTTCTGGCGACGCGTGCCTGGCTGGCGACTCGAACGATCGGTCCGGCATGTCGACCGTGGCGGACGGCACGCCTGTGCGCTCGAACTGCTGCCGGCCGATCGGACGGTGTTCGCACACTACGCGTCGAG…
Sikorskaya et al. 2021, Phytochemistry	MZ189999.1	NA	Animalia	Cnidaria	Anthozoa	Malacalcyonacea	Paramuriceidae	Menella	Menella sp.	yes	0	NA	no	NA	NA	GAGAGTTAAAAAGTACGTGAAACCGTTGAAAGGGAAGCGAATGGAGTTAGCAATTCGCCCTGCCAGATTCAGCAGCTCGCGCGCCGCGACGCACGCGCTCTCGATCCGCATGGACGAGACGTGCGCGGGTGCGGCGCGCGGTCTGCGCACTTCTGGCGAGCGAGCGTCAGCGTCGGTTGCCGACGTGCTACAAGGACGCGGGGAAGGTGGACAGGCCCTCGTGGCCTGTTGTTATAGCCCCGCGCTCGCATGGCTCGACGGCGACCGAGGCTTCTGGCGACGCGTGCCTGGCTGGCGACTCGAACGATCGGTCCGGCATGTCGACCGTGGCGGACGGCACGCCTGTGCGCTCGAACTGCTGCCGGCCGATCGGACGGTGTTCGCACACTACGCGTCGAG…
Sikorskaya et al. 2021, Phytochemistry	MZ190000.1	NA	Animalia	Cnidaria	Anthozoa	Scleralcyonacea	Ellisellidae	Junceella	Junceella fragilis	no	NA	NA	no	NA	NA	GAGAGTTAAAAAGTACGTGAAACCGTTGAAAGGGAAGCGAATGGAGTTAGCAATTCGCCCTGCCAGATTCAGTCTTACGCGTTCCGCGACGGGCGCGCACTCGATCTACGTAGACGAGTCGTGTTCGGACGCGGCACGGGAGAGGCGCATTTATGGCAGGCGAGCGTCAACGTCGGTCTTCGTCGGGCTAAAAGGCCGTGAGGGAGGTGAACGGCCTTCGGGCCGTTGTTATAACCTCGCGAGCGTATGGCTCGACGAAGACCGTGGAGTCGCGACGCGTGCTTCCCTCCGGGGGGGCTGGTGTCCTGTTCTGTTGGTCCGGTTGTCGACCGTGGCGGACGGCACGCCTGTGCGCTCGAACTGCTGCCGGTCAACAGGGCGGTGATCACACACTACGCG…
Chen et al. 2022, Diversity	OK586250.1	NA	Animalia	Cnidaria	Anthozoa	Scleractinia	Merulinidae	Platygyra	Platygyra pini	no	NA	NA	no	NA	NA	GAGAGTTAAAAAGTACGTGAAACCGTCGAAAGGGAAACGAATGGACTCAGCAATGCGCCCTCTGAGATTCAGCCGGTGGGTGGCGGCGGCGCCGGGTTTGCGGATCTGAATGGACCGCGGCCTGGCGCCCGCCTCTCCCCGCCGTCGCACTTCTCTGGGGCGCGCGTCAACGTGGGTTGGGACTGGGTCTGAAAGGCGCCGGGAAGGTAGGTGTGGGCCTTCGGGTCCGTTCTGTTACAGCCCGGTTCTCTCATGGCTCGGGCCCGACCGAGGAGCGACACGGGGCATGCCTCCTGTGGCTAGGGTCCCGCCCTTCCGGCCGGCTGTCCAGTGCGGTGGACTGCTTGCAGTGCTCCGCGACGGCTGCCGGTCGTTGGGGTGGTGATCTCGTACCATGCC…
Perisamy et al. 2023, Zootaxa	OQ625530.1	NA	Animalia	Cnidaria	Anthozoa	Scleralcyonacea	Coralliidae	Paragorgia	Paragorgia coralloides	yes	0	NA	no	NA	NA	GAGAGTTAAAGAGTACGTGAAACCGTTAAAAGGGAAGCGAATGAAACCAGCAATTTGCCTTGCCAGATTCAGTCGCCTGCGCTCGATCACGTGCTTGTTCGCGATTTTTTTAGACGCGACTCGTACAATTGGCCGAGCGAAGGCGGCGCACTTCTGGTAGGTGAGTGTCAGCATCAGATGGTCACGGGTTAGAAAGTTGCGATGAAGGTAGATCCTTCGGGATTGTTCAGCGTCGCAAACAAATCACCCGAGGCTGCCTGTGGTCTGTCGCAATGCGTGCCTTCCGTGGGTTGGCTGGTGTCCTGTCCTGTTGATGCGGTTGTCGACTGCGGCGGACGGCTATGCCAGTGCGTCCAAACCGCTGCCCGTCTCCAGATCGGGGTGCACACACCACGCGTT…
Perisamy et al. 2023, Zootaxa	OQ625531.1	NA	Animalia	Cnidaria	Anthozoa	Scleralcyonacea	Keratoisididae	Dokidisis	Dokidisis sp.	yes	0	NA	no	NA	NA	GAGAGTTAAAAAGTGCGTGAAACCGTTGGAAGGGAAGCGAATGGGGTCGGCAATTCACCTGATCAGATTCAGTCACGCGCGTTCCACAACGCGCTCGCTCTTCGCGATCTTTCCAGACGCATCGTGTGCGACGTGGGACGGGCGTGGTGCACTTCTGTCACGTGAGCGTCAACGTCAGTTCACTGCGAGTCAAACGGCCCCGAGGACGGTAGGTCCCCCTTCTGGGGGATCGGTAAGCCTCTTGTGCACACGACTTCACGTGGACTGTGTCTTGTCGCAGCGCGGGCCTCCCTTCCGAGGGCAGGCTGCAGTCTCGTCGCTCTGCCGTTCACGGTGCTAAACGGACGGCTACGCCTGTGCGTCACAAGCGCAGACGGTCGAGTGACGAGCGACACCGAC…
Perisamy et al. 2023, Zootaxa	OQ625532.1	NA	Animalia	Cnidaria	Anthozoa	Scleralcyonacea	Keratoisididae	Adinisis	Adinisis sp.	yes	0	NA	no	NA	NA	GAGAGTTAAAAAGTGCGTGAAACCGCTGGAAGGGAAGCGAATGGAGTCGACGATTCACCTGATCAGATTCAGTCACTCGCTTTCCACAACGCGCTCGATCTTCGCGATCTTTCCAGACGCATCTTGTGCGACGTGGGATGGGCGTGGTGCACTTCTGTCACGTGAGCGTCAACGTCAGTTCACTGCGAGTCAAACGGCCTCGAGGACGGTAGGTACCCCTCTTGGGGGATCGGTAAGCCTTTTGTGCACACGACTCCACGTGGACTGTGTCCTGTCGCAGCGCGGGCCTCCCTTCCCAGGGCAGGCTGCAGTCTTGTCGCTCTACCGTTCACTGTGCTAGACGGACGGCGACGCCTGTGCGTCACAAGCGCGGACGGTCGAGTGGCGAGCGACACCGAC…
This study	PP073569	Sanger	Animalia	Cnidaria	Anthozoa	Scleralcyonacea	Primnoidae	Callogorgia	Callogorgia delta	yes	0	NA	no	NA	NA	GAGAGTTAAAAAGTGCGTGAAACCGCTGGAAGGGAAGCGAATAGAGTTTGCAATTCGCCTTGCCGGATTCAGCCGCTCCAGCCTCGCGGCGTGCTCGGCTTCGATCTTTCTAGACGAGCCTTGCACGCTCGCGTTGCTTGGAGCGGTGCACTTCCGGTTGGCGAAAGTCAACGTCGGTTTGCGCGGAGTCAAAAAGCTGCAAGCACGGTAGGTCTCTCACGATCGGTAAGGCTTGCGAGCAAATGGCTTCACGTAGACCGAGTTCTGTCGCAGCACGTACCTCCCCTCCCGGGGCGGGCTGCTGTCCTTATCGTTGAGTCGGTTTAATGTCGCTGGACGGACGGCTTTGCCTGTGCGTCCCGGTGCGGCCGTTCAAACGATGGGGCAACCAGACACGAC…
This study	PP073570	Sanger	Animalia	Cnidaria	Anthozoa	Malacalcyonacea	Victorgorgiidae	Trachythela	Trachythela sp.	yes	0	NA	no	NA	NA	GAGAGTTAAAAAGTACGTGAAACCGTTGAAAGGGAAGCGAATGGAGTTAGCAATTCGCCCTGCCAGATTCAGTTGCTCGCGCTTCGCGACGTGCGCGCTCTCGATCCGCATGGACGAGACGTGTGCGGGTGCGATGTGTGGACGGCGCACTTCTGGCGAGCGAGCGTCAGCGTCGGTTGTCGGCGGGCGACAAGGATGCAAGGAAGGTGGACTGGTCTTTATGACCGGTTGTTAAGCCTTGTGCTCGTATAGCTCGACGGCGACCGTGGCTCTGCGACGCGTGCCTGGCTGGTGACCCGAACGTTCGGTCCGGCATGTCGACCGTAGCGGACGGCACGCCTGTGCGCTCAAACTGCTGCCGGCCGATCGGATGGTGTTCGCACACTACGCGTCTAAGAT…
This study	PP073571	Sanger	Animalia	Cnidaria	Anthozoa	Malacalcyonacea	Plexauridae	Muricea	Muricea pendula	yes	0	NA	no	NA	NA	GAGAGTTAAANAGTACGTGAAACCGTTGAAAGGGAAGCGAATGGAGTTAGCAATTTGCCCTGTCGGATTCAGTCGTTCGCTCGCGGCGACGTTCGTGCTCTCGATCCAAGCGGACGGGACGTGAACGGATACGGCGAGCGATCGGCGCACTTTCGGCGGACAAGCGTCAGCATCGCTCGGCCGTGGGCGAAAAGCACKCGAGGAAGGTGAACCGCGTCTGGTTGTTAAGCCTCGTGAACGCCTGGCCCATTGCCGACCGTTTCCTCTGCGACGTGTGCCTGCCTGGCAGCTCGAACTGTCGGCTCGGCGTGTCGACTGTGGCGGACGGCACGCCTGTGCGCACGAACTGCCGCCGATCGACAGTGTGATGCTCGCACATGACGCGTCAAAAATGCCGAC…
This study	PP073572	Sanger	Animalia	Cnidaria	Anthozoa	Malacalcyonacea	Paramuriceidae		Paramuriceidae sp.	yes	0	NA	no	NA	NA	GAGAGTTAAAAAGTACGTGAAACCGTTGAAAGGGAAGCGAATGGAGTTAGCAATTCGCCCTGCCAGATTCAGTTGCTCGTGCTTCGCGACGCACGCGCTCTCGATCCGCATGGACGAGGCGTGTGCGGGTGCGATGTGCGGACGGCGCACTTCTGGCGAGCGAGCGTCAGCGTCGGTTGTCGACGGGCGACAAGGACACGAGGAAGGTAAACCGGCCTTTACAGCCGGTTGTTAAGCCTTGTGCTCGCATAGCTCGACGGCGACCGTGGCTCGGCGACGCGTGCCTGGCTGGCGACTCGAACGATCGGTCCGGCATGTCGAACGTGGCGGACGGCACGCCTGTGCGCTCAAACTGCTGCCGGTCGATCGGACGATGTTCGCACACTACGCGTCGAAGAT…
This study	PP073573	Sanger	Animalia	Cnidaria	Anthozoa	Malacalcyonacea	Paramuriceidae		Paramuriceidae sp.	yes	0	NA	no	NA	NA	GAGAGTTAAAAAGTACGTGAAACCGTTGAAAGGGAAGCGAATGGAGTTAGCAATTCGCCCTGCCAGATTCAGTTGCTCGTGCTTCGCGACGCACGCGCTCTCGATCCGCATGGACGAGACGTGTGCGGGTGCGTTGTGCGGTCGGCGCACTTCTGGCGAGCGAGCGTCAGCGTCGGTTGTCGACGGGCGACAAGGACACGAGGAAGGTGGGCCGGCGTTTACCGCCGGTTGTTAAGCCTCGTGCTCGCATAGCTCGACGACGACCGTGGCTCGGCGACGCGTGCCTGGCTGGCGACTCGAACGATCGGTCCGGCATGTCGACCGTGGCGGACGGCACGCCTGTGCGCTCGAACTGCTGCCGGTCGATCGGACGATGTTCGCACACTACGCGTCGAAGAT…
This study	PP073574	Sanger	Animalia	Cnidaria	Anthozoa	Malacalcyonacea	Gorgoniidae	Callistephanus	cf. Callistephanus sp.	yes	0	NA	no	NA	NA	GAGAGTTAAAAAGTACGTGAAACCGTTGAAAGGGAAGCGAATGGAGTTAGCAATTCGCCCTGCCAGATTCAGTTGTCCGTGCTTCGCGACGTGCGCGCTCTCGATCCGCATGGACGAGACGTGTGCGGATGCGATGCGTGGGCGGCGCACTTCTGGCGAGCGAGCGTCAGCGTCGGTTGTCGACGGGCGACAAGGACATGAGGAAGGTGAACCGACCTTTACGGCCGGTTGTTAAGCCTCTTGCTCTCATAGCCCGACGGCGACCGTGGTTCTGCGACGCGTGCCTCGCTGGTGACTCTTACGATCGGTCCGGCATGTCGACCGTGGCGGACGGCACGCCTGTGCGCTCAAACTGCTGCCGGTCGATCGAATGATGCTCACACACTACGCGTCGAAGAT…
This study	PP073575	Sanger	Animalia	Cnidaria	Anthozoa	Malacalcyonacea	Gorgoniidae	Callistephanus	cf. Callistephanus sp.	yes	0	NA	no	NA	NA	GAGAGTTAAAAAGTACGTGAAACCGTTGAAAGGGAAGCGAATGGAGTTAGCAATTCGCCCTGCCAGATTCAGTTGTCCGTGCTTCGCGACGTGCGCGCTCTCGATCCGCATGGACGAGACGTGTGCGGATGCGATGCGTGGGCGGCGCACTTCTGGCGAGCGAGCGTCAGCGTCGGTTGTCGACGGGCGACAAGGACATGAGGAAGGTGAACCGACCTTTACGGCCGGTTGTTAAGCCTCTTGCTCTCATAGCCCGACGGCGACCGTGGTTCTGCGACGCGTGCCTCGCTGGTGACTCTTACGATCGGTCCGGCATGTCGACCGTGGCGGACGGCACGCCTGTGCGCTCAAACTGCTGCCGGTCGATCGAATGATGCTCACACACTACGCGTCGAAGAT…
This study	PP073576	Sanger	Animalia	Cnidaria	Anthozoa	Scleralcyonacea	Ellisellidae	Ellisella	Ellisella sp.	yes	0	NA	no	NA	NA	GAGAGTTAAAGAGTACGTGAAACCGTTGAAAGGGAAGCGAATGGAGTTAGCAATTCGCCCTGCCATATTCAGTCTTTGGCGTTCCGTGACGGGTGTGCACTCGATCTACGTAGACGAGTCGTGTTCGTACACGGGGCGGCACAGGCGCATTTATGGCGGGCGAGCGTCAACGTCGGTCTTCGTTGCGCTAAAAGGCCGCGAGGGAGGTGAACCCCCTTCGGGCGGTTGTTATAACTTCGCGCGCATATCGCTCGATGAAGACCGTGGAGTCGCGACGTGTTCCTTCTTTCGGAGGGCTGGTGTCCTGTTTTGTTGATCCGGTTGTCGACCGTGGCGGACGGCACGCCTGTGCGCTCGAACTGCTGCCGTTCAACAGGGCGGTGATCACACACTACGCGT…
This study	PP073577	Sanger	Animalia	Cnidaria	Anthozoa	Antipatharia	Antipathidae	Stichopathes	Stichopathes sp.	yes	0	NA	no	NA	NA	GAGAGTTAAAAAGTACGTGAAACCGTTGAAAGGGAAACGAATGCAGCTAGCAATGCACCTTGCGAGATTCAGCCGACGGGTGGCGAGGCCGCGCGGTTCGCAGATCTGAATTGACTGTGGCCGCGTGGTTCGCGCTCCCCGCCGTCGCACTTCTCTCGGGTGCGCGTCAACATGGGTCGGGACCGGGTCTCACAGGCGCGGGCAAGGTAGGTCCGTCCCCTCGGGGAAGGACTGTTTAGGCCTGCGTTCTATCGGCTCGGGCCCGATCGAGGAGTCGCAGCACATGCCTCTTGTGGCTGGGGTCCCGTCTCTCCGGTTGGTTGTCGACCGTGGTGGACTGCTTGCAGTGCACCGCAACTGCTGCCGGTCGCTGGGGCGGTGACTTCGCACTATGTGCTA…
This study	PP073578	Sanger	Animalia	Cnidaria	Anthozoa	Malacalcyonacea	Carijoidae	Carijoa	Carijoa riisei	yes	0	NA	no	NA	NA	GAGAGTTAAAAAGTACGTGAAACCGTTGAAAGGGAAGCGAATGGAGTTAGCAATTCGCCCTGTCAGATTCAGTCGTTCGCGCCACGTGCGACGTGCGCGCTCTCGATCCACATGGACGAGACGTGCGCGTTTGTCGTGTGCGAGCGGCGCACTTCTGGCGGGCGAGCGTCAGCGTCGGTTGTCGACGGGTGATAAAGGCGTGGGGAAGGTAGACCGCTCTTCTCGAACGGTTGTTAAGCCTCGCGTTCGCATGGCTCGACGGTGACCGTGGCTCTCGAAGAGAGAGGCGACGCGTGCGTGGCTGGCGATTCGTCGGTCGGTCCGGCATGTCGAATGTGGCGGACGGCATGCCTGTGCGCTCGAACTGCTGCCGGTCGTTCCGACGATCTCTGCACACTA…
This study	PP073579	Sanger	Animalia	Cnidaria	Anthozoa	Scleralcyonacea	Ellisellidae	Nicella	Nicella sp.	yes	0	NA	no	NA	NA	GAGAGTTAAAGAGTACGTGAAACCGTTGAAAGGGAAGCGAATGGAGTTAGCAATTCGCCCTGCCAGATTCAGTCTTACGCGTTCCGCGACGGGCGCGCACTCGATCTACGTAGACGAGTCGTGTTCGGACGCGGGACGGGAGAGGCGCACTTATGGCGGGCGAGCGTCAACGTCGGTCTTCCTCGAGCTAAAAGGCCGTGAGGGAGGTGAACCGCCTTCGGGCAGTTGTTATAACCTCGCGAACGTATCGCTCGAGGAAGACCGTGGAGTCGCGACGCGTGCCTCCTTTCGAGGGGGCTGGTGTCCTGTTTTGTTGGTCCGGTTGTCGACCGTGGCGGACGGCACGCCTGTGCGCTCGAACTGCTGCCGGTCAACAGGGCGGTGATCACACACTACGCG…
This study	PP073580	Sanger	Animalia	Cnidaria	Anthozoa	Malacalcyonacea	Paramuriceidae		Paramuriceidae sp.	yes	0	NA	no	NA	NA	GAGAGTTAAAAAGTACGTGAAACCGTTGAAAGGGAAGCGAATGGAGTTAGCAATTCGCCCCGCCAGATTCAGTTGCTCGCACGTCGCGACGTACGCGCCCTCGATCCGCATGGACGAGGCGTGTGCGGGTGCGACGTGCGGTCTGCGCACTTCTGGCGAGCGAGCGTCAGCGTCGGTTGTCGACGGGCGACAAGGACGCGGGGAAGGTGGACTGGCCTTCGCGGCCGGTTGTTACAGCCCCGTGCTCGCATAGCTCGACGGCGACCGTGGCTCGGCGACGCGTGCCTGGCTGGTGACTCGAACGATCGGTCCGGCATGTCGACCGTGGCGGACGGCACGCCTGTGCGCTCAAACCGCTGCCGGTCGATCGGACGATGTTCACACACTACGCGTCAATGA…
This study	PP073581	Sanger	Animalia	Cnidaria	Anthozoa	Malacalcyonacea	Paramuriceidae	Placogorgia	Placogorgia cf. rudis/tenuis	yes	0	NA	no	NA	NA	GAGAGTTAAAAAGTACGTGAAACCGTTGAAAGGGAAGCGAATGGAGTTAGCAATTCGCCCCGCCAGATTCAGTTGCTCGCACGTCGCGACGTACGCGCTCTCGATCCGCATGGACGAGGCGTGTGCGGGTGCGACGTGCGGTCTGCGCACTTCTGGCGAGCGAGCGTCAGCGTCGGTTGTCGACGGGCGACAAGGACAGGGGGAAGGTGGACTGGCCTTCACGGCCGGTTGTTACAGCCCCGTGCTCGCATAGCTCGACGGCGACCGTGGCTCGGCGACGCGTGCCTGGCTGGTGACTCGAACGATCGGTCCGGCATGTCGACCGTGGCGGACGGCACGCCTGTGCGCTCAAACCGCTGCCGGCCGATCGGACGATGTTCACACACTACGCGTCAATGA…
This study	PP073582	Sanger	Animalia	Cnidaria	Anthozoa	Scleralcyonacea	Ellisellidae	Nicella	Nicella sp.	yes	0	NA	no	NA	NA	GAGAGTTAAAGAGTACGTGAAACCGTTGAAAGGGAAGCGAATGGAGTTAGCAATTCGCCCCGCCAGATTCAGTCTTACGCGTTCCGCGACGGGCGCGCACTCGATCTACGTAGACGAGTCGTGTTCGGACGCGGGACGGGAGAGGCGCACTTATGGCGGGCGAGCGTCAACGTCGGTCTTCGTCGAGCTAAAAGGCCGTGAGGGAGGTGAACCGCCTTCGGGCAGTTGTTATAACCTCGCGAACGTATCGCTCGAGGAAGACCGTGGAGTCGCGACGCGTGCCTCCTTTCGAGGGGGCTGGTGTCCTGTTTTGTTGGTCCGGTTGTCGACCGTGGCGGACGGCACGCCTGTGCGCTCGAACTGCTGCCGGTCAACAGGGCGGTGATCACACACTACGCG…
This study	PP073583	Sanger	Animalia	Cnidaria	Anthozoa	Malacalcyonacea			Malacalcyonacea sp.	yes	0	NA	no	NA	NA	GAGAGTTAAAAAGTACGTGAAACCGTTGAAAGGGAAGCGAATGGAGTTAGCAATTCGCCTGCCTGATTCAGTTGGTCGTGCTTCGCGACGTGCGCGCTCTCGATCCGCATGGACGAGGCGTGTACGGGTGCGACGTGCGGTCGGCGCACTTCTGGCAGGCGAGCGTCAGCGTCGGTTGTCGACGGGCGAAAAGGACACAAGGAAGGTGAACCGTCCCTCGTGGAAGGTTGTTAAGCCTTGTGCTCGCATAGCTCGACGGCGACCGTGGCCGGGCGACGCGTGCCTGGCTGGCGACTTGTACGATCTGTTTGGCATGTCGACCGTGGCGGACGGCACGCCTGTGCGCTCAAACTGCTGCCGGCGGATCGTACGATGTTCGCACACTACGCGTCGAAGATG…
This study	PP073584	Sanger	Animalia	Cnidaria	Anthozoa	Scleralcyonacea	Ellisellidae	Ellisella	Ellisella sp.	yes	0	NA	no	NA	NA	GAGAGTTAAAGAGTACGTGAAACCGTTGAAAGGGAAGCGAATGGAGTTAGCAATTCGCCCTGCCATATTCAGTCTTTCGCGTTCCGTGACGGGCGTGCACTCGATCTACGTAGACGAGTCGTGTTCGTACACGGGGCGGCACAGGCGCATTTATGGCGGGCGAGCGTCAGCGTCGGTCTTCGTTGCGCTAAAAGGCCGCGAGGGAGGTGAACCACCTTCGGGCGGTTGTTATAACCTCGCGAGCATATCGCTCGATGAAGACCGTGGAGTCGCGACGTGTGCCTTCTTTCGAAGGGCTGGTGTCCTGTTTTGTTGATCCGGTTGTCGACCGTGGCGGACGGCACGCCTGTGCGCTCGAACTGCTGCCGTTCAACAAGGCGGTGATCACACACTACGCGT…
This study	PP073585	Sanger	Animalia	Cnidaria	Anthozoa	Malacalcyonacea	Paramuriceidae	Bebryce	Bebryce cf. cinerea/grandis	yes	0	NA	no	NA	NA	GAGAGTTAAAAAGTACGTGAAACCGTTGAAAGGGAAGCGAATGGAGTTAGCAATTCGCCCTGCCAGATTCAGTTGCTCGTGCTTCGCGACGCACGCGCTCTCGATCCGCATGGACGAGACGTGTGCGGGTGCGATGTGCGGTCGGCGCACTTCTGGCGAGCGAGCGTCAGCGTCGGTTGTCGACGGGCGACAAGGACACGAGGAAGGTGGGCCGGCCTTTACCGCCGGTTGTTAAGCCTCGTGCTCGCATAGCTCGACGGCGACCGTGGCTCGGCGACGCGTGCCTGGCTGGCGACTCGAACGATCGGTCCGGCATGTCGACCGTGGCGGACGGCACGCCTGTGCGCTCAAACTGCTGCCGGTCGATCGGACGATGTTCGCACACTACGCGTCGAAGAT…
This study	PP073586	Sanger	Animalia	Cnidaria	Anthozoa	Scleralcyonacea	Ellisellidae	Ellisella	Ellisella sp.	yes	0	NA	no	NA	NA	GAGAGTTAAAGAGTACGTGAAACCGTTGAAAGGGAAGCGAATGGAGTTAGCAATTCGCCCTGCCATATTCAGTCTTTCGCGTTCCGTGACGGGCGTGCACTCGATCTACGTAGACGAGTCGTGTTCGTACACGGGGCGGCACAGGCGCATTTATGGCGGGCGAGCGTCAGCGTCGGTCTTCGTTGCGCTAAAAGGCCGCGAGGGAGGTGAACCACCTTCGGGCGGTTGTTATAACCTCGCGAGCATATCGCTCGATGAASACCGTGGAGTCGCGACGTGTGCCTTCTTTCGGAGGGCTGGTGTCCTGTTTTGTTGATCCGGTTGTCGACCGTGGCGGACGGCACGCCTGTGCGCTCGAACTGCTGCCGTTCAACAAGGCGGTGATCACACACTACGCGT…
This study	PP073587	Sanger	Animalia	Cnidaria	Anthozoa	Antipatharia	Antipathidae	Stichopathes	Stichopathes sp.	yes	0	NA	no	NA	NA	GAGAGTTAAAAAGTACGTGAAACCGTTGAAAGGGAAACGAATGGAGCTAGCAATGCACCCTGCGAGATTCAGCCGGTGAGTGGCGCGGGCGCGCGGTTCGCAGATCTGAATTGACTGTGGCCGCGCGGTTCGCGCTCCCCGCCGTCGCACTTCTCGCGGGTGCGCGTCAACATGGGTCGGGACCGGGTCTCACAGGCGCGGGCAAGGTAGGTCCGTCCCCTCAGGGGGAGGGACTGTTTAGGCCCGCGTTCTAGCGGCTCGGGTCCGATCGAGGAGTCGCAGCACATGCCTCTTGTGGCTGGGGTCCCGTCTCTCCGGTTGGTTGTCGACCGTGGTGGACTGCTTGCAGTGCACCACGACTGCTGCCGGTCGCTGGGGCGGTGGCTTCGCACTATGTGC…
This study	PP073588	Sanger	Animalia	Cnidaria	Anthozoa	Antipatharia	Antipathidae	Antipathes	Antipathes furcata	yes	0	NA	no	NA	NA	GAGAGTTAAAAAGTACGTGAAACCGTTGAAAGGGAAACGAATGGAGCTAGCAATGCACCCTGCGAGATTCAGCCGGTGGGCGGCGTGGCCGTGCGGTTCGCAGATCCGAATCGACTGTGGCCGTGCGGTTCGCGTCCCCCGCCGTCGCACTTCTCGCGGGTGCGCGTCAACATGGATCGGAACCGGGTCTCACAGGCGTCGGCAAGGTAGGTCCGTCCTCTCGGGGATGTTCTGTTATAGGCCGGCGTTCTCGCGGCTCGGGTCCGATCGAGGAGTCGCAGCACATGCCTCTCGGGGCTGGGGTCCCGTCTCTCCGGTTGGTTGTCGACCGTGGTGGACTGCTTGCAGTGCACCGCAACTGCTGCCGGTCGCTGGGGCGGTGACGTCGCACTATGTGCT…
This study	PP073589	Sanger	Animalia	Cnidaria	Anthozoa	Antipatharia	Antipathidae	Antipathes	Antipathes atlantica	yes	0	NA	no	NA	NA	GAGAGTTAAAAAGTACGTGAAACCGTTGAAAGGGAAACGAATGGAGCTAGCAATGCACCCTGCGAGATTCAGCCGGTGGGCGGCGTGGCCGTGCGGTTCGCAGATCCGAATCGACTGTGGCCGTGCGGTTCGCGTCCCCCGCCGTCGCACTTCTCGCGGGTGCGCGTCAACATGGATCGGAACCGGGTCTCACAGGCGTCGGCAAGGTAGGTCCGTCCTCTCGGGGATGTTCTGTTATAGGCCGGCGTTCTCGCGGCTCGGGTCCGATCGAGGAGTCGCAGCACATGCCTCTCGGGGCTGGGGTCCCGTCTCTCCGGTTGGTTGTCGACCGCGGTGGACTGCTTGCAGTGCACCGCAACTGCTGCCGGTCGCTGGGGCGGTGACGTCGCACTATGTGCT…
This study	PP073590	Sanger	Animalia	Cnidaria	Anthozoa	Malacalcyonacea	Malacalcyonacea_incertae_sedis	Thesea	Thesea cf. rubra	yes	0	NA	yes	2	37, 46	GAGAGTTAAAAAGTACGTGAAACCGTTGAAAGGGAAGCGAATGGAGTCAGCAATTCGCCCTGCCAGATTCAGTTGTTCGTGCTTCGCGACGTGCGCGCTCTCGATCCGCATGGACGAGACGTGTACGGATGCGATGCGCGGGCGGCGCACTTCTGGCGAGCGAGCGTCAGCGTCGGTTGTCGACGGGCGACAAAGACACGAGGAAGGTGAACCGGCCTTTTACGGCCGGTTGTTAAGCCTCGTGTTCGCATAGCCCGACGGCGACCGTGGCTCTGCGACGCGTGCCTGGCTGGTGACTCGTACGATCGGTCCGGCATGTCGACCGTGGCGGACGGCACGCCTGTGCGCTCGAACTGCTGCCGGTCGATCGAATGAYGTTCACACACTACGCGTCGAGGA…
This study	PP073591	Sanger	Animalia	Cnidaria	Anthozoa	Malacalcyonacea	Malacalcyonacea_incertae_sedis	Thesea	Thesea cf. rubra	yes	0	NA	yes	2	37, 46	GAGAGTTAAAAAGTACGTGAAACCGTTGAAAGGGAAGCGAATGGAGTCAGCAATTCGCCCTGCCAGATTCAGTTGTTCGTGCTTCGCGACGTGCGCGCTCTCGATCCGCATGGACGAGACGTGTACGGATGCGTTGCGCGGGCGGCGCACTTCTGGCGAGCGAGCGTCAGCGTCGGTTGTCGACGGGCGACAAAGACACGAGGAAGGTGAACCGGCCTTTTACGGCCGGTTGTTAAGCCTCGTGTTCGCATAGCCCGACGGCGACCGTGGCTCTGCGACGCGTGCCTGGCTGGTGACTCGTACGATCGGTCCGGCATGTCGACCGTGGCGGACGGCACGCCTGTGCGCTCGAACTGCTGCCGGTCGATCGAATGAYGTTCACACACTACGCGTCGAGGA…
This study	PP073592	Sanger	Animalia	Cnidaria	Anthozoa	Malacalcyonacea	Gorgoniidae	Leptogorgia	Leptogorgia cf. violacea	yes	0	NA	no	NA	NA	GAGAGTTAAAAAGTACGTGAAACCGTTGAAAGGGAAGCGAATGGAGTTAGCAATTCGCCCTGCTAGATTCAGTTGTTCGTGCTTCGCGACGTGCGCGCTCTCGATCCGCATGGACGAGGCGCGCACGGATGCGATGTGCGGACTGCGCACTTCTGGCGAGCGAGCGTCAGCGTCGGTTGTCGATGGGCGACAAGGACATGAGGAAGGTGAACTGGTCCTTGTGACCGGTTGTTATAGCCTCTTGTTCGCATAGCCCGACGGCGACCGTGGCTCTGCGACGCGTGCCTGGCTGGTGATTCTTACGATCGGTCCGGCATGTCGACCGTGGCGGACGGCACGCCTGTGCGCTCAAACTGCTGCCGGTCGATCGTACGTTTTTCACACACTACGCGTCTAGGA…
This study	PP073593	Sanger	Animalia	Cnidaria	Anthozoa	Malacalcyonacea	Siphonogorgiidae	Chironephthya	Chironephthya sp.	yes	0	NA	no	NA	NA	GAGAGTTAAAAAGTACGTGAAACCGTTGAAAGGGAAGCGAATGGAGTTAGCAATTCGCCCAGCCAGACTCAGTTGCCCGTGCTTCGCGACGTGCGCGCTCTCGATTCACATGAACGAGACGTGCACGGGTGCGATGTGCGAGCGGCGCACTTCTGGCGGGCGAGCGTCAGCGTCGGTTGTCGACGGGCGATAAGGACGCGAGGAAGGTGAACTTGCTGTTCGCGCAGTGGGTTGTTAAGCCTCGCGGTTCGCATAGCTCGACGGCGACCGTGGCTCGTGGAGTCGACGCGTGCTTGGCTGGCCACTCGTGCGATCGGTCCGGCATGTCGAACGTGGCGGACGGCACGCCTGTGCGCCCAAACTGCGGCCGGTCGCTCGCACGATGTGTGCTCACAACGC…
This study	PP073594	Sanger	Animalia	Cnidaria	Anthozoa	Antipatharia	Myriopathidae	Tanacetipathes	Tanacetipathes sp.	yes	0	NA	no	NA	NA	GAGAGTTAAAAAGTACGTGAAACCGTTAAAAGGGAAACGAATGGAGCTAGCAATGCACCCTGCGAGATTCAGCCGGTGGGTGGTTCGGGCACGTAGTTTGCAGATCTGAATTGACTGCGGCCGCGTGGTTCGGGCTCCTCGCCGTCGCACTTCTCGCGGGTGCGCGTCAACATGGGTTGGGACCGGGTCTTAAAGGCGTTGGCAAGGTAGGTCCGTCCCTTCGGGGACTGACTGTTTAGGCCAGCGTTCTCACGGCCCGGGCCCGGCTGAGGAGTTGCAGCACATGCCTCTTGTGGCTGGGGTCCCGTTCCTCCGGTTGGTTGTCGACTGTGGTGGACTGCTTGCAGTGCACCGCGACTGCTGCCGGTCGCTGGGGCGGTGACTTCGCACTATGTGCTT…
This study	PP073595	Sanger	Animalia	Cnidaria	Anthozoa	Antipatharia	Leiopathidae	Leiopathes	Leiopathes cf. glaberrima	yes	0	NA	no	NA	NA	GAGAGTTAAAAAGTACGTGAAACCGTTAAAAGGGAAACGAATGGAGCTAGCAATGCGCCCTGTGAGATTCAGCCGGCCGGTGGTCCAGGCGCGTGGCTTGCAGATCTGAATTGACTGCGGCCGCGTGGTTTGGGCTCCCGACCGTCGCACTTCTTGCGGGCGCGCGTCAACATGGGTTGGGAGTGGGTCTGAAAGGCACCGGGAAGGTAGGTCCGACCCCTCGGGGCTGGTCTGTTATAGTCCGGTGTTCTCATGGCTCGCGCCCGACCGAGGAGTTGCAGCACATGCCTCTTGTGGCTGGGGTCCCGTCGTTCCGGTTGGTTGTCGACGGCGGTGGACTGCGTGCAGTGCACCGCGACTGCTGCCGGTCGCTACGGTGGTGACTTCGCACCATGTGCT…
This study	PP073596	Sanger	Animalia	Cnidaria	Anthozoa	Malacalcyonacea	Alcyoniidae	Lateothela	Lateothela cf. grandiflora	yes	0	NA	no	NA	NA	GAGAGTTAAAAAGTACGTGAAACCGTTGAAAGGGAAGCGAATGGAGTTAGCAATTCGCCCTGCCAGATTCAGTTGCTCGTGCGCCGCGACGTGCGCGCTCTCGATCCGCATGGACGAGGCGTGCGCGGGTGCGGCGCTCGGACGGCGCACTTCTGGCGGGCGAGCGTCAGCGTCGGTTGTCGACGGGCGATAAGGACGCGAGGAAGGTGGAGCGGCCCTCGGGCCGCTTGTTAAGCCTTGCGCACGTATAGCTCGACGGCGACCGTGGCTCCGAAGGAGGCGACGCGTGCCTCTAGCTGGTGACTCGAACGATCGGTCTGGCATGTCGACCGTGGCGGACGGCACGCCTGTGCGCTCGAACTGCTGCCGGTCGATCGTGCGATGTTCGCACACTACGCG…
This study	PP073597	Sanger	Animalia	Cnidaria	Anthozoa	Scleralcyonacea	Ellisellidae	Nicella	Nicella sp.	yes	0	NA	no	NA	NA	GAGAGTTAAAGAGTACGTGAAACCGTTGAAAGGGAAGCGAATGGAGTTAGCAATTCGCCCTGCCAGATTCAGTCTTACGCGTTCCGCGACGGGCGCGCACTCGATCTACGTAGACGAGTCGTGTTCGGACGCGGGACGGGAGAGGCGCACTTATGGCGGGCGAGCGTCAACGTCGGTCTTCCTCGAGCTAAAAGGCCGTGAGGGAGGTGAACCGCCTTCGGGCAGTTGTTATAACCTCGCGAACGTATCGCTCGAGGAAGACCGTGGAGTCGCGACGCGTGCCTCCTTTCGAGGGGGCTGGTGTCCTGTTTTGTTGGTCCGGTTGTCGACCGTGGCGGACGGCACGCCTGTGCGCTCGAACTGCTGCCGGTCAACAGGGCGGTGATCACACACTACGCG…
This study	PP073598	Sanger	Animalia	Cnidaria	Anthozoa	Malacalcyonacea	Scleracidae	Scleracis	Scleracis cf. guadalupensis	yes	0	NA	no	NA	NA	GAGAGTTAAAAAGTACGTGAAACCGTTGAAAGGGAAGCGAATGGAGTTAGCAATTCGCCCTGCCAGATTCAGTTGATCGTGCCTCGCGACGTGCGCGCTCTCGATCCGCATGGACGAGACGTGTGCGGGTGCGATGCTCGGTCGGCGCACTTCTGGCGAGCGAGCGTCAGCGTCGGTTGTCGACGGGCGACAAGGACACGAGGAAGGTGGACCGGTCTTCGCGGCCGGTTGTTAAGCCTCGTGCTCGCATAGCTCGACGGCGACCGTGGCTCTGCGACGCGTGCCTGGCTGGCGACTCGTACGATCGGTTCGGCATGTCGACCGTGGCGGACGGCACGCCTGTGCGCTCAAACTGCTGCCGGTCGATCGTTCGATGTTCGCACACTACGCGTCGAAGAT…
This study	PP073599	Sanger	Animalia	Cnidaria	Anthozoa	Scleralcyonacea	Ellisellidae	Nicella	Nicella sp.	yes	0	NA	no	NA	NA	GAGAGTTAAAGAGTACGTGAAACCGTTGAAAGGGAAGCGAATGGAGTTAGCAATTCGCCCTGCCAGATTCAGTCTTACGCGTTCCGCGACGGGCGCGCACTCGATCTACGTAGACGAGTCGTGTTCGGATGCGGGACGGGAGAGGCGCACTTATGGCGGGCGAGCGTCAACGTCGGTCTTCCTCGAGCTAAAAGGCCGTGAGGGAGGTGAACCGCCTTCGGGCAGTTGTTATAACCTCGCGAACGTATCGCTCGAGGAAGACCGTGGAGTCGCGACGCGTGCCTCCTTTCGAGGGGGCTGGTGTCCTGTTTTGTTGGTCCGGTTGTCGACCGTGGCGGACGGCACGCCTGTGCGCTCGAACTGCTGCCGGTCAACAGGGCGGTGATCACACACTACGCG…
This study	PP073600	Sanger	Animalia	Cnidaria	Anthozoa	Scleralcyonacea	Ellisellidae	Nicella	Nicella sp.	yes	0	NA	no	NA	NA	GAGAGTTAAAGAGTACGTGAAACCGTTGAAAGGGAAGCGAATGGAGTTAGCAATTCGCCCCGCCAGATTCAGTCTTACGCGTTCCGCGACGGGCGCGCACTCGATCTACGTAGACGAGTCGTGTTCGGACGCGGGACGGGAGAGGCGCACTTATGGCGGGCGAGCGTCAACGTCGGTCTTCGTCGAGCTAAAAGGCCGTGAGGGAGGTAAACCGCCTTCGGGCAGTTGTTATAACCTCGCGAACGTATCGCTCGAGGAAGACCGTGGAGTCGCGACGCGTGCCTCCTTTCGAGGGGGCTGGTGTCCTGTTTTGTTGGTCCGGTTGTCGACCGTGGCGGACGGCACGCCTGTGCGCTCGAACTGCTGCCGGTCAACAGGGCGGTGATCACACACTACGCG…
This study	PP073601	Sanger	Animalia	Cnidaria	Anthozoa	Malacalcyonacea	Malacalcyonacea_incertae_sedis	Thesea	Thesea nivea	yes	0	NA	no	NA	NA	GAGAGTTAAAAAGTACGTGAAACCGTTGAAAGGGAAGCGAATGGAGTTAGCAATTCGCCCTGCCAGATTCAGTTGCTCGTGCTTCGCGACGCGCTCGCTCTCGATCCGCATGGACGAGACGTGTGCGGGTGCGATGTGCGGTCGGCGCACTTCTGGCGAGCGAGCGTCAGCGTCGGTTGTCGACGGGCGACAAGGACACGAGGAAGGTGAGCCGGCCTTACCGCCGGTTGTTAAGCCTCGTGCTCGCATAGCTCGACGGCGACCGTGGCTCTGCGACGCGTGCCTGGCTGGTGACTCGAACGATCGGTCCGGCATGTCGACCGTGGCGGACGGCACGCCTGTGCGCTCAAACTGCTGCCGGTCGATCGGACGATGTTCGCACACTACGCGTCGAAGATG…
This study	PP073602	Sanger	Animalia	Cnidaria	Anthozoa	Zoantharia	Parazoanthidae	Umimayanthus	Umimayanthus parasiticus	yes	0	NA	yes	2	46, 48	GAGAGTTAAAAAGTACGTGAAACCGTTGAAAGGGAAACGAATGGAGTTAGCAATGCACCCTGCAAGATTCAGCCGGCGGGYGGCGCGGACGGGCGGTTGGCGGATCCGAATGGACCGCCGTCGTCCGGCTCGCGCTCCCCTCCGTCGCACTTCTTGCGGGTGCGCGTCAACGTCGGTTCGGACCCGGTCTGAAAGTGTGCGGGAAGGTAGGTCGCGTCGCCTCGGCGTCGCTTCTGTTACAGCCCGCGCTCGCATGGCCGGGACCGGACCGAGGCGCCGCAGCGCATGCCTCTTCTGGCTAGTGTCCCTCTGTGCCGGTCGGTTGTCGACTGTGGTGGACTGCGTGCAGTGCACCCGAACTGCTTCCGGTCGCCGCGGAGGTGACTTCGTACCATGCGC…
This study	PP073603	Sanger	Animalia	Cnidaria	Anthozoa	Malacalcyonacea	Malacalcyonacea_incertae_sedis	Thesea	Thesea cf. guadalupensis	yes	0	NA	no	NA	NA	GAGAGTTAAAAAGTACGTGAAACCGTTGAAAGGGAAGCGAATGGAGTTAGCAATTCGCCCTGCCAGATTCAGTTGTTCGTGCTTCGCGACGTGCGCGCTCTCGATCCGCATGGACGAGACGTGTACGGATGCGTTGCGCGGGCGGCGCACTTCTGGCGAGCGAGCGTCAGCGTCGGTTGTCGACGGGCGACAAAGACACGAGGAAGGTGAACCGGCCTTTTACGGCCGGTTGTTAAGCCTCGTGTTCGCATAGCCCGACGGCGACCGTGGCTCTGCGACGCGTGCCTGGCTGGTGACTCGTACGATCGGTCCGGCATGTCGACCGTGGCGGACGGCACGCCTGTGCGCTCGAACTGCTGCCGGTCGATCGAATGATGTTCACACACTACGCGTCGAGGA…
This study	PP073604	Sanger	Animalia	Cnidaria	Anthozoa	Scleralcyonacea	Primnoidae	Callogorgia	Callogorgia cf. gracilis	yes	0	NA	no	NA	NA	GAGAGTTAAAAAGTGCGTGAAACCGTTGGAAGGGAAGCGAATAGAGTTAGCAATTCGCCTTGCCGGATTCAGCCGCTCCAGCATCGCGGCGTGCTCGGCTTCGATCTTTCTATAGACGAGCCTCGTACGCTCGCGTTGCTTGGGCGGTGCACTTCCGGTTGGCGAAAGTCAACGTCGGTTTGCACGGAGTCAAAAAGCTGCAAGCGCGGTAGGTCTCTCGTGATCGGTAAGGCTTGCGTGCAAATGGCTTCATGCAGACCGAGTTCTGTCGCAGCACGTACCTCCCCTCCCGGGGCAGGCTGATGTCCTGGTCGTTGAGTCGGTTTAATGTCGCTGGACGGACGGCTTTGCCTGTGCGTCGCGGTGCGGCCGTTCAAACGACCGGGCAAACACACACGA…
This study	PP073605	Sanger	Animalia	Cnidaria	Anthozoa	Malacalcyonacea	Nidaliidae	Nidalia	Nidalia sp.	yes	0	NA	no	NA	NA	GAGAGTTAAAAAGTACGTGAAACCGTTGAAAGGGAAGCGAATGGAGTTAGCAATTCGCTCTGCCAGACTCAGTTGCCCGCGCTTCGCGACGCGCRCGTTCTCGATCCCCAATTTGGACGAGACGTGCGCGGGTGCGATGTGCGGACGGCGCACTTCTGGCGAGCGAGCGTCAGCGTCGGTTGTCGACGGGCGATAAGGTCGCAAGGAAGGTGAACCGTTCTTCGCGAACGGTTGTTAAGCCTTGCGCTCGCATAGCTCGACGGCGACCGTGGCTCCTTCTTTTTAAGAAAGGCGACGCGTGCCTTTGTGCTGGCGACTCACGCGTTCGGTCCGGCATGTCGACCGTGGCGGACGGCACGCCTGTGCGCTCGAACTGCTGCCGGTCGATCGTGAGATGTT…
This study	PP073606	Sanger	Animalia	Cnidaria	Anthozoa	Antipatharia	Antipathidae	Antipathes	Antipathes atlantica	yes	0	NA	no	NA	NA	GAGAGTTAAAAAGTACGTGAAACCGTTGAAAGGGAAACGAATGGAGCTAGCAATGCACCCTGCGAGATTCAGCCGGTGGGCGGCGTGGCCGTGCGGTTCGCAGATCCGAATCGACTGTGGCCGTGCGGTTCGCGTCCCCCGCCGTCGCACTTCTCGCGGGTGCGCGTCAACATGGATCGGAACCGGGTCTCACAGGCGTCGGCAAGGTAGGTCCGTCCTCTCGGGGATGTTCTGTTATAGGCCGGCGTTCTCGCGGCTCGGGTCCGATCGAGGAGTCGCAGCACATGCCTCTCGGGGCTGGGGTCCCGTCTCTCCGGTTGGTTGTCGACCGCGGTGGACTGCTTGCAGTGCACCGCAACTGCTGCCGGTCGCTGGGGCGGTGACGTCGCACTATGTGCT…
This study	PP073607	Sanger	Animalia	Cnidaria	Anthozoa	Antipatharia	Aphanipathidae	Elatopathes	Elatopathes abietina	yes	0	NA	no	NA	NA	GAGAGTTAAAAAGTACGTGAAACCGTTAAAAGGGAAACGAATGGAGCTAGCAATGCACCCTGCGAGATTCAGCCGGTGGGTGGTTCGGGCGCGTGGTTTGCAGATCTGAATCGACTGCGGCCGCGCGGTTCGGGCTCCCCGCCGTCGCACTTCTCGCGGGTGCGCGTCAACATGGGTTGGGACCGGGTCTTAAAGGCGTCGGCAAGGTAGGTCCGTCCTCTCGGGGTCGGACTGTTTAGGCCAGCGTTCTCACGGCCCGGGCCCGACCGAGGTGCTGCAGCACATGCCTCTTGTGGCTGGGGTCTCGTTCCTCCGGTTGGTTGTCGACCGTGGTGGACTGCTTGCAGTGCACCGCGACTGCTGCCGGTCGCTGGGGCGGTGACTTCGCACTATGTGCTT…
This study	PP073608	Sanger	Animalia	Cnidaria	Anthozoa	Scleralcyonacea	Ellisellidae	Ellisella	Ellisella sp.	yes	0	NA	no	NA	NA	GAGAGTTAAAGAGTACGTGAAACCGTTGAAAGGGAAGCGAATGGAGTTAGCAATTCGCCCTGTCATATTCAGTCTTTTGCGTTCCGTGACGGGTGTGCACTCGATCTACGTAGACGAGTCGTGTTCGTACACGGGGCAGCACAGGCGCATTTATGGCGGGCGAGCGTCAACGTCGGTCTTCGTTGCGCTAAAAGGCCGCGAGGGAGGTGAGCCGCCTTCGGSCGGTTGTTATAACCTCGCGAGCATATCGCTCGCTGAAGACCGTGGAGTCGCGACGCGTGCCTCCTTTCGGAGGGCTGGTGTCCTGTTTTGTTGATSCGGTTGTCGACCGTGGCGGACGGCACGCCTGTGCGCTCGAACTGCTGCCGATCAACAGGGCGGTGATCACACACTACGCGT…
This study	PP073609	Sanger	Animalia	Cnidaria	Anthozoa	Antipatharia	Cladopathidae	Sibopathes	Sibopathes sp.	yes	0	NA	no	NA	NA	GAGAGTTAAAAAGTACGTGAAACCGTTAAAAGGGAAACGAATGGAGCTAGCAATGCACCCAGTGAGATTCAGCCTGTAGGTGGCTAGGGCGCGCTGATTGCAGATCTGAATTGACTGCTGCAGTGCGGTTCGAGCTCCCTGCCGTCGCACTTCTCGCGGGCGCGCGTCAACATGGGTTGGGACCGGGTCTAAAAGGCACCGGCAAGGTAGGTCCGTGCCTCTGGGTACGTACTGTTCTAGGCCGACGTTCTCGCGGCCCGGGCCCGACCGAGGCGATGCAGCACATGCCTCTTGTGGCTGGGGTCCCGTTCTTCCGGTTGGTTGTCGACTGTGGTGGACTGCGTGCAGTGCACCGCGACCGCTGCCGGTCGCTTGGGCGGTGACTTCGCATGATGTGCT…
This study	PP073610	Sanger	Animalia	Cnidaria	Anthozoa	Scleralcyonacea	Primnoidae	Paracalyptrophora	Paracalyptrophora carinata	yes	0	NA	no	NA	NA	GAGAGTTAAAAAGTGCGTGAAACCGCTGGAAGGGAAGCGAATGGAGTCGGCGATTCGCCTTGTCRGATTCAGCCGCCCCAGTAGCGCCTCGTGCTCGCTCTCGATCTTTCGAGACGAGCCTTGTGCGCGTGCGTTACGTGGGCGGTGCACTTCCGGCAGGCGAACGTCAACGTCGGTTTGCCACGAGTCACAAAGCTGCGAGCACGGTAGGTCCCTCGGGATCGGTAAGGCTCGTATGCACATGGCTCGATGCAGACCGAGTTCTGGCGCAGCGCGTGCCCTCCCTTCGGGGCAGGCTGCTGTCTTTGTCGTTGACTCGGTCGCGCCGCTCGACGGACGGCTTTGCCTGTGCGTCGTGGTGCGGCCGACCAATCGATTGAGCAAACAGACACGACGCGC…
This study	PP073611	Sanger	Animalia	Cnidaria	Anthozoa	Malacalcyonacea	Paramuriceidae	Paramuricea	Paramuricea sp. (A/E)	yes	0	NA	no	NA	NA	GAGAGTTAAAAAGTACGTGAAACCGTTGAAAGGGAAGCGAATGGAGTTAGCAATTCGCCCCGCCAGATTCAGTTGCTCGCACGTCGCGACGTACGCGCTCTCGATCCGCATGGACGAGACGTGTGCGGGTGCGACGTGCGGTCTGCGCACTTCTGGCGAGCGAGCGTCAGCGTCGGTTGTCGACGGGCGACAAGGACGCGGGGAAGGTGGGCTGGCCTTCACGGCCGGTTGTTACAGCCCCGTGCTCGCATAGCTCGACGGCGACCGTGGCTCGGCGACGCGTGCCTGGCTGGTGACTCGAACGATCGGTCCGGCATGTCGACCGTGGCGGACGGCACGCCTGTGCGCTCAAACCGCTGCCGGTCGATCGGACGGTGTTCACACACTACGCGTCAAAGA…
This study	PP073612	Sanger	Animalia	Cnidaria	Anthozoa	Scleralcyonacea	Chelidonisididae	Chelidonisis	Chelidonisis aurantiaca mexicana	yes	0	NA	no	NA	NA	GAGAGTTAAAGAGTACGTGAAACCGTTGAAAGGGAAGCGAATGGAACTTAAAATTCGCTTTGCCAGATTCAGTCCCTTGCGTCCTCCAACGTGAGTGTTCTCGATCTTTTTAGACGGGACGCGTACGGACGGCGGAACGTGGGCGGTGCATTTCTGGTAGGCGAGCGTCAACATCACTTGGCCGCGAGTTAGAAAGCTGCGAGGAAGGTAGGTCCTTCGGGATCGTTAAGCCTTGCCAGCAAATAACTCGAGGCCGACTGTGGCTTGTCGCAACGCGTGCCTCCCCTCGGGGCAGGCTGGTGTCTTGTTTTGTTGGTATGGTCGGCGATGGCGACGGACGACGGTTGCCTGTGCGTCCGAACTGCGGCCTGTCGACAGGATGGTGAACATACACCACGC…
Quattrini et al. 2020, Nature Ecology & Evolution	PP073613	NA	Animalia	Cnidaria	Anthozoa	Malacalcyonacea	Plexaurellidae	Plexaurella	Plexaurella nutans	yes	0	NA	no	NA	NA	GAGAGTTAAAAAGTACGTGAAACCGTTGAAAGGGAAGCGAATGGAGTTAGCAATTCGCCCTGCCAGATTCAGCTGTTCGTGCTTCGTGACGTGCGCGTGCTCGATCCACTCTTGGGCGAGCCGTGTACGGACGCGACGTGCTGGCGGCGCACTTCTGGCTAAGCGAGCGTCAGCGTCGGTTGTCGACGGGCGACAAGGACGAGAGGAAGGTGAGCCGGTCTTCACGGCCGGTTGTTAAGCCTCTTGATCGCATAGCTCGACGGCGACCGTGGCTCTGCGACGCGTGCCTAGCTGGTGACTCGTGTGATCGGTTCGGCTGTCGACCGTGGCGGACGGCATGCCTGTGCGTTCCAAACTGCTGCCGGTCGATCGCATGATGTTCACACAATACGCGTCGAA…
Quattrini et al. 2020, Nature Ecology & Evolution	PP073614	NA	Animalia	Cnidaria	Anthozoa	Malacalcyonacea	Malacacanthidae	Malacacanthus	Malacacanthus capensis	yes	0	NA	no	NA	NA	GAGAGTTAAAAAGTACGTGAAACCGTTGAAAGGGAAGCGAATGGAGTTAGCAATTCGCCCCGCCACACTCAGTTGTTCGTGCTTCGCGACGTGCACGCTTTCGATCCGCTAGGACGAGACGTGTACGGCTGCGACGTTCGGACGGCGCACTTCTGGCGGGCGAGCGTCAGCGTCGGTTGTCGACGGGCGATAAGGTAGCGAGGAAGGTGAACCGTTCTTCGGATCGGTTGTTAAGCCTCGCGCTCACATAGCTCGACGGCGACCGTGGCTCATCGAGGCGACGCGTGCCTGGCTGGTGACTCGTACGATCGGTCCGGCATGTCGAACGTAGCGGACGGCACGCCTGTGCGCTCAAACTGCTGCCGGTCGATCGTTTTGATGTTCACACACTACGTGTCG…
Quattrini et al. 2020, Nature Ecology & Evolution	PP073615	NA	Animalia	Cnidaria	Anthozoa	Malacalcyonacea	Acrophytidae	Acrophytum	Acrophytum claviger	yes	0	NA	no	NA	NA	GAGAGTTAAAAAGTACGTGAAACCGTTGAAAGGGAAGCGAATGGAGTTAGCAATTCGCCCTGCCAGATTCAGTTTGTCCGCTCTTCGCGACGCGCTTGCTCTCGATCCGCATGGACGAGACGTGCGCGGGCGCGGCGTGCGGACTGCGCACTTCTGGCGAGCGAGCGTCAGCGTCGGTTGGCGACGGGCGACAAGGACTCGAGGAAGGTGGACCGCTCTCGCGGGCGGTTGTCGTATAGCCTCGTGCCTCTCGCATAGCCCGACGGCGACCGTGGATGGAATTGGCGACGCGTGCTTGGCTGGCGACTCGAACGATCGGTCCGGCATGTCGACCGTGGCGGACGGCACGCCTGTGCGCTCAAACCGCTGCCGGTGGATCGGACGATGTTCGCACAATAC…
Quattrini et al. 2020, Nature Ecology & Evolution	PP073616	NA	Animalia	Cnidaria	Anthozoa	Malacalcyonacea	Discophytidae	Discophyton	Discophyton rudyi	yes	0	NA	no	NA	NA	GAGAGTTAAAAAGTACGTGAAACCGTTGAAAGGGAAGCGAATGGAGTTAGCAATTCGCCCTGCCAGATTCAGTTGCTCGTGCCTCGCGACGTCTACGCTCTCGATCCGCATGGACGAGGCGTGAACGGGTGCGATTTGCGGGCGGCGCACTTCTGGCGAGCGAGCGTCAGCGTCGGTTGTCGACGGGCGACAAGGACATGAGGAAGGTGAACCGGCCCTCGTGGCTGGTTGTTAAGCCTCGTGCTCGCATAGCTCGACGGCGACCGTGGCTCTGCGACGCGTGCCTGGCTGGTGACTCGAACGATCGGTCCGGCATGTCGACTGTGGTGGACGGCACGCCTGTGCGCTCGAACTGCTGCCGGTCGATCGGACGATGTTCACACACTACGCGTCGAGGAT…
Quattrini et al. 2020, Nature Ecology & Evolution	PP073617	NA	Animalia	Cnidaria	Anthozoa	Malacalcyonacea	Paralcyoniidae	Ceeceenus	Ceeceenus quadrus	yes	0	NA	no	NA	NA	GAGAGTTAAAAAGTACGTGAAACCGTTGAAAGGGAAGCGAATGGAGTTAGCAATTCGCCCAGCCAGATTCAGTTGTTTGTGCCTCGCGACGTGCGCGCTCTCGATCCGCATGGACGAGACGTGTGCGGGTGCGATGTGCGAACGGCGCACTTCTGGCGAGCGAGCGTCAGCGTCGGTTGTCGGCGGGCGACAAGGTCACATGGAAGGTGGACTGGCCTCACGGCCGGTTGTTAAGACATGTGCTCGTATAGCTCGACTGCGACCGTGGCTCTGCGACGTGTGCTTGGCTGGCGACCCGAACGATCGGTCCGGCATGTCGACCGTGGTGGACGGCACGCCTGTGCGCTCAAACTGCTGCCGGTCGATCGGACGGTGTTCGCACACTACGCGTCTAAGATG…
Quattrini et al. 2020, Nature Ecology & Evolution	PP073618	NA	Animalia	Cnidaria	Anthozoa	Malacalcyonacea	Acanthoaxiidae	Acanthoaxis	Acanthoaxis wirtzi	yes	0	NA	no	NA	NA	GAGAGTTAAAAAGTACGTGAAACCGTTGAAAGGGAAGCGAATGGAGTTAGCAATTCGCCCCGCCAGATTCAGTCGTTCGCGCCGTGCGACGCGCACGCCCTCGATCCGCATGGACGAGGCGTGTGCGGACGCGCGGTACGCGCGGCGCACTTCTGGCGAGCGAGCGTCAGCGTCGGTTGCCGACGGGCGATAAGGACGCGAGGAAGGTGGGCCGGCCCTCGGGCCGGTTGTTAAGCCTCGCGCTCGAACGGCTCGACGGCGACCGTGGCCGTTGTAGAAACGGGCGGCTCGTGCCTCGTGCTGGCGACCCGAACCGATCGGTCCGGCATGTCGACCGTGGCGGACGGCATGCCTGTGCGCTCGAACCGCTGCCGGTCGATCGGACGGTGTTCGCACACT…
Quattrini et al. 2020, Nature Ecology & Evolution	PP073619	NA	Animalia	Cnidaria	Anthozoa	Malacalcyonacea	Keroeididae	Keroeides	Keroeides sp.	yes	0	NA	no	NA	NA	GAGAGTTAAAAAGTACGTGAAACCGTTGAAAGGGAAGCGAATGGAGTTAGCAATTCGCCCTGCCAGATTCAGTTGCTCGTGCTTCGTGACGTGCGCGCTCTCGATCCGCATGGACGAGACGTGTACGGGTGCGATGTGCGGTCAGCGCACTTCTGGCGGGCGAGCGTCAGCGTCGGTTGTCGACGGGCGACAAGGACACAAGGAAGGTGAACCGATCTTTATGGCCGGTTGTTAAGCCTTGTGCTCGCATAACCCGACGGCGACCGTGGCTCTGCGACGCGTGCCTGGCTGGGGACTCGTACGATCGGTCCGGCATTACGACCGTGGCGGACGGCACGCCTGTGCGCTCGAACTGCTGCCGGTCGATCGGACGATGCTCCCACACTACGCGTCGAAGAT…
Quattrini et al. 2020, Nature Ecology & Evolution	PP073620	NA	Animalia	Cnidaria	Anthozoa	Malacalcyonacea	Isididae	Isis	Isis hippuris	yes	0	NA	no	NA	NA	GAGAGTTAAAAAGTACGTGAAACCGTTGAAAGGGAAGCGAATGGAGTTAGCAATTCGCCCTGCCAGATTCAGTTGCTCGTGCTTCGCGACGTGCGCGCTCTCGATCCGCATGGACGAGACGTGTACGGGTGCGTTGTACGGACGGCGCACTTCTGGCGAGCGAGCGTCAGCGTCGGTTGTCGACGGGCGACAAGGACACAAGGAAGGTAGACCGCCCTTTATGGACGGTTGTTAAGCCTTGTGCTCGCATAGCTTGACGGCGACCGTGGCTTTGCGACGCGTGCCTGGCTGGTGACTCGAACGATCGGTCCGGCATGTCGACCGTGGCGGACGGCACGCCTGTGCGCTCGAACTGCTGCCGGTCGATCGGACGATGTTCGCACACTACGCGTCGAAGAT…
Quattrini et al. 2020, Nature Ecology & Evolution	PP073621	NA	Animalia	Cnidaria	Anthozoa	Malacalcyonacea	Xeniidae	Protodendron	Protodendron repens	yes	0	NA	no	NA	NA	GAGAGTTAAAAAGTACGTGAAACCGTTGAAAGGGAAGCGAATGGAGTTAGCAATTCGTTTGTCAGATTCAGTTGCACGTGCGTCGCAACGTGCGCGCTCTCGATCCCCATGGACGAGTCGTGCACGGATGCGACGTGCAAGCGGCGCACTTCTGGCAGGCGAGCGTCAGCGTCGGTTGTCGTCGAGCGATAAGGTCGTAAGGAAGGTAGACGAGTCCTCGTGGCACGTTGTTAAGCCTTGCGCTCGCATAGCTCGACGGTGACCGTGGCACTGCGACGCGTGCTTGGCTGGCGACCCATTCTCTCGGTCCGACATGTCGATCGTGGTGGACGGCACGCCTGTGCACTCAAACTGCTGTCGGTCGCGAGATGGTGTTCGCACACTACGCGTCAAGGATGC…
Quattrini et al. 2020, Nature Ecology & Evolution	PP073622	NA	Animalia	Cnidaria	Anthozoa	Malacalcyonacea	Isididae	Rumphella	Rumphella sp.	yes	0	NA	no	NA	NA	GAGAGTTAAAAAGTACGTGAAACCGTTGAAAGGGAAGCGAATGGAGTTAGCAATTCGCCCTGCCAGATTCAGTTGCTCGTGCTTCGCGACGTGCGCGCTCTCGATCCGCATGGACGAGACGTGTACGGGTGCGTAGTGCGAGCGGCGCACTTCTGGCGAGCGAGCGTCAGCGTCGGTTGTCGACGGGCGACAAGGACACAAGGAAGGTGGACCGGCCTTTATGGACGGTTGTTAAGCCTTGTGCTCGCATAGCTCGACGGCGACCGTGGCTCTGCGACGCGTGCCTGGCTGGTGACTCGAACGATCGGTCCGGCATGTCGACCGTGGCGGACGGCACGCCTGTGCGCTCGAACTGCTGCCGGTCGATCGGACGATGTTCGCACACTACGCGTCGAAGAT…
Quattrini et al. 2020, Nature Ecology & Evolution	PP073623	NA	Animalia	Cnidaria	Anthozoa	Malacalcyonacea	Eunicellidae	Eunicella	Eunicella tricoronata	yes	0	NA	no	NA	NA	GAGAGTTAAAAAGTACGTGAAACCGTTGAAAGGGAAGCGAATGGAGTTAGCAATTCGCCCTGCCAGATTCAGCTGCTCGCGCTTCGCGACGTGCGCGCTCTCGATCCGCATGGACGAGACGTGCGCGGGTGCGACGTGCGGCCGGCGCACTTCTGGCGAGCGAGCGTCAGCGTCGGTTGTCGACGGGCGATAAGGACACGAGGAAGGTGGACCGGTCCTCGCGGCCGGTTGTTAAGCCTCGTGCTCGCATAGCCCGACGGCGACCGTGGCTTCTGCGACGCGTGCCTGGCTGGTGACTCGAACGATCGGTCCGGCATGTCGACCGTGGCGGACGGCACGCCTGTGCGCTCAAACTGCTGCCGGTCGATCGGACGATGTTCGCACACTACGCGTCGAAGA…
Quattrini et al. 2020, Nature Ecology & Evolution	PP073624	NA	Animalia	Cnidaria	Anthozoa	Scleractinia	Dendrophylliidae	Tubastraea	Tubastraea coccinea	yes	0	NA	yes	0	NA	GAGAGTTAAAAAGTACGTGAAACCGTTGGAAGGGAAACGAATGGACTCAGCAATGCGCCGTTTGAGATTCAGCCGGCCGGCGGGATCGGCTCGGGGTGCGCGGATCCGAATGGACCGCCGTCTCGGGCTCGTTTCTCCCGGCCGTCGCACTTCTCTTGGGCGCACGTCAACGTCGGTTGGGACTGGGTCTGAAAGGTTCCGGGAAGGTAGGTCCGCGCGTTCCTCGCGTTCGCGCGCTCTGTTACAGCCCGGTTCTCTTGCGGCTCGGGCCCGACCGAGGCGGTCGCAGCGCATGCCTCTTTTGGCTAGGGTCCCGTCCGTCCGGCCGGTTGTCGACCGCGGTGGACTGCTTGCAGTGCTCCGCGACTGCTGCCGGTCGTTCGGGCGGTGATCTCGTAC…
Quattrini et al. 2020, Nature Ecology & Evolution	PP073625	NA	Animalia	Cnidaria	Anthozoa	Scleractinia	Faviidae	Mussismilia	Mussismilia hispida	yes	2	27, 30	yes	0	NA	GAGAGTTAAAGAGTACGTGAAACCGTCGGTAGGGAAACGAATGGACTCAGCAATGCGTCTCGGTGAGATTCAGACGGCGGGCGAGCTCGGCTCTGGGTCTGTGGATCCGAATGGAACGCAGCCTTGGGCTCGCGACCTCCCGCCGACGCACTTCTCTCCGGCGCGCGTCAACATCGGTTGGGACTGGGTCTCCAGGGTTCCGGGAAGGTAGGTGCGGACGAACGGATCCTTCGCGGTTTGGTACGTCCACTCTGTTATATTCAGCCCGGTTCTACAGGCTGGGTCCCGACCGAGGCAGTTGCAGGGCGAGCCTCTTGTGGCTAGGGTCCCGTCCCTCCGGCCGGCCGACCGATGCGGTTAGGACTGCTTGCAGTGCTCGGCGATGGCTGCCGGTCGTTG…
Quattrini et al. 2020, Nature Ecology & Evolution	PP073626	NA	Animalia	Cnidaria	Anthozoa	Antipatharia	Aphanipathidae	Aphanipathes	Aphanipathes pedata	yes	0	NA	no	NA	NA	GAGAGTTAAAAAGTACGTGAAACCGTTAAAAGGGAAACGAATGGAGCTAGCAATGCACCCTGCGAGATTCAGCCGGTGGGTGGCCCGGGCGCGCGGTTTGCAGATCTGAATTGACTGCGGCCGCGCGGTTCGGGCTCCCCGCCGTCGCACTTCTCGCGGGTGCGCGTCAACATGGGTTGGAACCGGGTCTCAAAGGCGTCGGCAAGGTAGGTCCGTCCCTTCGGGGCCGGACTGTTTAGGCCGGCGTTCTCGCGGCCCGGGTCCGACCGAGGAGATGCAGCACATGCCTCTTGTGGCTGGTGTCCCGTTCCTCCGGTTGGTTGTCGAATGTGGTGGACTGCTTGCAGTGCACCGCGACTGCTGCCGGTCGCTGGGGCGGTGACTTCGCACTATGTGCTT…
Quattrini et al. 2020, Nature Ecology & Evolution	PP073627	NA	Animalia	Cnidaria	Anthozoa	Antipatharia	Antipathidae	Antipathes	Antipathes grandis	yes	0	NA	no	NA	NA	GAGAGTTAAAAAGTACGTGAAACCGTTGAAAGGGAAACGAATGGAGCTAGCAATGCACCCTGCGAGATTCAGCCGACGGGTGGCGAGGCCGCGCGGCTCGCAGATCTGAATTGACTGCGGCCGCGCGGTTCGCGCTCCCCGCCGTCGCACTTCTCGCGGGTGCGCGTCAACATGGGTCGGGACCGGGTCTCACAGGCGCGGGCAAGGTAGGTCCGTCCCCTCGGGGAGGGACTGTTTAGGCCTGCGTTCTAGCGGCTCGGGCCCGATCGAGGAGTCGCAGCACATGCCTCTTGTGGCTGGGGTCCCGTCTCTCCGGTTGGTTGTCGACCGTGGTGGACTGCTTGCAGTGCACCGCGACTGCTGCCGGTCGCTGTGGCGGTGACTTCGCACTATGTGCTA…
Quattrini et al. 2020, Nature Ecology & Evolution	PP073628	NA	Animalia	Cnidaria	Anthozoa	Antipatharia	Schizopathidae	Stauropathes	Stauropathes sp.	yes	0	NA	no	NA	NA	GAGAGTTAAAAAGTACGTGAAACCGTTAAAAGGGAAACGAATGGAGCTAGCAATGCACCCAGCGAGATTCAGCTGGTTGGTGGTTCGGCCGCGATGTGTGCAGATCTGAATTGACTGCGGCTTCGTGGTTCGAGCTCCCTGCCATCGCACTTCTCGCGGGCGCGCGTCAACATGGGTTGGGACCGGGTCTAAACGGCACCGGCAAGGTAAGTCCGCACCTCCGGGTACGTGCTGTTCTAGGCCGGCGCTCTCGCGGCCCGGACCCGACCGAGGCGATGCAGCACATGCCTCTTGTGGCTGGGGTCCCGTTCTTCCGGTTGGTTGTCGACTGTGGTGGACTGCGTGCAGTGCACCGCGACTGCTGCCGGTCGCTTGGGCGGTGACTTCGCATGATGTGCT…
Quattrini et al. 2020, Nature Ecology & Evolution	PP073629	NA	Animalia	Cnidaria	Anthozoa	Antipatharia	Schizopathidae	Stauropathes	Stauropathes arctica	yes	0	NA	no	NA	NA	GAGAGTTAAAAAGTACGTGAAACCGTTAAAAGGGAAACGAATGGAGCTAGCAATGCACCCAGCGAGATTCAGCTGGTTGGTGGATCGGCCGCGATGTGTGCAGATCTGAATTGACTGCGGCTTCGTGGTTCGAGCTCCCTGCCATCGCACTTCTCGCGGGCGCGCGTCAACATGGGTTGGGACCGGGTCTAAACGGCACCGGCAAGGTAAGTCCGCACCTCCGGGTACGTACTGTTCTAGGCCGGCGCTCTCGCGGCCCGGACCCGACCGAGGCGATGCAGCACATGCCTCTTGTGGCTGGGGTCCCGTTCTTCCGGTTGGTTGTCGACTGTGGTGGACTGCGTGCAGTGCACCGCGACTGCTGCCGGTCGCTTGGGCGGTGACTTCGCATGATGTGCT…
Quattrini et al. 2020, Nature Ecology & Evolution	PP073630	NA	Animalia	Cnidaria	Anthozoa	Antipatharia	Myriopathidae	Myriopathes	Myriopathes ulex	yes	0	NA	no	NA	NA	GAGAGTTAAAAAGTACGTGAAACCGTTAAAAGGGAAACGAATGGAGCTAGCAATGCACCCTGCGAGATTCAGCCGGTGGGTGGTTCGGGCGCGTAGTTTGCAGATCTGAATTGACTGCGGCCGCGCGGTTCGGGCTCCTCGCCGTCGCACTTCTCGCTGGTGCGTGTCAACATGGGTTGGGACCGGGTCTTAAAGGCGTCGGCAAGGTAGGTCCGTCCCCTCGGGGACTGACTGTTTAGGCCAGCGTTCTCACGGCCCGGGCCCGGCTGAGGAGTTGCAGCACATGCCTCTTGTGGCTGGGGTCCCGTTCCTCCGGTTGGTTGTCGACTGTGGTGGACTGCTTGCAGTGCACCGCGACTGCTGCCGGTCGCTGGGGCGGTGACTTCGCACTATGTGCTT…
Quattrini et al. 2020, Nature Ecology & Evolution	PP073631	NA	Animalia	Cnidaria	Anthozoa	Antipatharia	Schizopathidae	Umbellapathes	Umbellapathes sp.	yes	0	NA	no	NA	NA	GAGAGTTAAAAAGTACGTGAAACCGTTAAAAGGGAAACGAATGGAGCTAGCAATGCACCCAGTGAGATTCAGCCGGTTGGTGGCTGGGGCGCGCTGTTTGCAGATCTGAATTGACTGCGGCAGTGCGGTTCCAGCTCCCTGCCGTCGCACTTCTCGCGGGCGCGCGTCAACATGGGTTGGGACCGGGTCTTAAAGGCACCGGCAAGGTAGGTCCGTACCTCCGGGTACGTACTGTTCTAGGCCGACGTTCTCACGGCCCGGGCCCGACCGAGGCGATGCAGCACATGCCTCTTGTGGCTGGGGTCCCGTTCTTCCGGTTGGTTGTCGACTGTGGTGGACTGCGTGCAGTGCACCGCGACCGCTGCCGGTCGCTTGGGCGGTGACTTCGCATGATGTGCT…
Quattrini et al. 2020, Nature Ecology & Evolution	PP073632	NA	Animalia	Cnidaria	Anthozoa	Scleractinia	Caryophylliidae	Phyllangia	Phyllangia americana	yes	0	NA	yes	0	NA	GAGAGTTAAAAAGTACGTGAAACCGTTGAAAGGGAAACGAATGGACTCAGCAATGCGCCGTTTGAGATTCAGCCGGAGGGTGGGATCGGCTCGGGGTTTGCGGATCTGAATGGACCGCGGCCTGGGGCTCGTTTCTCCTCGCCGTCGCACTTCTCTTGGGCGCGCGTCAACGTCGGTTGGGACTGGGTCTGAAAGGTGCCGGGAAGGTAGGTCTGGACCTCCGGGTCCGGTCTGTTACAGCCCGGTTCTCTCATGGCTCGGGCCCGACCGAGGAGTCGCAGCGCATGCCTCTTGTGGCTAGGGTGCCGTCCTTCCGGCCGGTCGTCGAATGTGGTGGACTGCTTGCAGTGCTCCGCGACCGCTGCCGGTCGTTGGGATGGTGATCTCGTACCATGCGCT…
Quattrini et al. 2020, Nature Ecology & Evolution	PP073633	NA	Animalia	Cnidaria	Anthozoa	Scleractinia	Pocilloporidae	Pocillopora	Pocillopora damicornis	yes	1	27	yes	0	NA	GAGAGTTAAAAAGTACGTGAAACCGTCAGAAGGGAAACGAATGGACTCAGCAATGCTCCCTTCGAGATTCAGCCGGTCGGCCTGCGCGCGGCTCGGGGTTTGCGGATCCGAACGGACCGCGGTCCCGGGCGCGTGCCTCGCCGCCGTCGCACTTCTCTTGGGCGCGCGTCAGCGTGGGTCGGAACTGGGCGTCGGAGGTGCCGTGGAAGGTAGGTCTGGAGTCTCGGCTCCGGACTGTTACAGCCCGGCTCCCGCGGCTCGGGTCCGACCGAGGACAGTCGCAGCGCGTGCCTCTTGTGGCTAGGGTCCCGTCCTTCCGGCCGGTCGTCGACCGTGGTGGACTGCTTGCAGTGCTCCGCGACTGCTGCCGGTCGTTGGGGCGGTGTTCTCGTACGACGC…
Quattrini et al. 2020, Nature Ecology & Evolution	PP073634	NA	Animalia	Cnidaria	Anthozoa	Scleractinia	Faviidae	Favia	Favia fragum	no	NA	NA	yes	0	NA	GAGAGTTAAAGAGTACGTGAAACCGTCTAGAGGGAAACGAATGGACTCAGCAATGCGTCCCGGCGAGATTCAGCCGGCGGGCGACCACGGTGCCGGGTCCGCGGATCCGAACGGACCGCGGCTCGGGGCTCGCGAGCTCCCGCCGTCGCACTTCTCTCGGGCGCGCGTCAACGTCGGTTGGGACTGGGTGTTAAGGGTGCCGGGAAGGTAGGCGCGGAGGCCCTCTTGCGGGGGGGCTCTTCCGCTCTGTTAACGCAGCCCGGCTTCTCGCATGACCCGGGCCCGACCGAGGCGGATACAGGGCATGCCTCTTGTGGCTAGGGGCCCGTCCTTCCGGCCGGCCGTCCGACGCGGTGGACTGCTTGCAGTGTTCGGCAATGGCTACCGGTCGTTTGGGCG…
Quattrini et al. 2020, Nature Ecology & Evolution	PP073635	NA	Animalia	Cnidaria	Anthozoa	Scleractinia	Meandrinidae	Meandrina	Meandrina meandrites	yes	0	NA	yes	0	NA	GAGAGTTAAAAAGTACGTGAAACCGTTGAAAGGGAAACGAATGGACTCAGCAATGCGCCGTTTGAGATTCAGCCGGTGGGTGGGATCGGCTCGGGGTTTGCGGATCTGAATGGACCGCGGCCTTGGGCTCGTTTGTCCTCGCCGTCGCACTTCTCTTGGGCGCGCGTCAACGTCGGTTGGGACTGGGTCTGAAAGGTGCCGGGAAGGTAGGTCTGGACCCCCGGGTCCGGTCTGTTACAGCCCGGTTCTCTCATGGCTCGGGCCCGACCGAGGAGTGGCAGCGCATGCCTCTTGTGGCTAGGGTGCCGTCCTTCCGGCCGGTTGTCGAATGCGGTGGACTGCTTGCAGTGCTCCGCGACTGCTGCCGGTCGTTGGGGTGGTGATCTCGTACCATGCGCT…
Quattrini et al. 2020, Nature Ecology & Evolution	PP073636	NA	Animalia	Cnidaria	Anthozoa	Scleractinia	Agariciidae	Agaricia	Agaricia lamarcki	yes	0	NA	yes	0	NA	GAGAGTTAAAAAGTACGTGAAACCGTTGGAAGGGAAACGAATGGACTCAGCAATGCGCCGTTTGAGATTCAGCCGGCGGGTGGCGTCGGCCCGGGGTTTGCGGATCTGAATGGACCGCGGTCCCGGGCCCGGTGCTCCCGGTCGTCGCACTTCTCTTGGGCGCGCGTCAACGTCGGTTGGGACTGGGTCTGAAAGGTGCCGGGAAGGTAGGTCTGTGCGTTCCCCTCTTCGGGGGGGGTCGCTCGGTCTGTTAGAGCCCGGTTCTCCTCGCGGCTCGGGCCCGACCGAGGCGGTTGCAGCGCATGCCTCTCGCAAGGCTAGGGTCCCGTCCCTCCGGCCGGTTGTCGAATGCGGTGGACTGCTTGCAGTGCTCCGCGAATGCTGCCGGTCGTTGGGGTG…
Quattrini et al. 2020, Nature Ecology & Evolution	PP073637	NA	Animalia	Cnidaria	Anthozoa	Scleractinia	Merulinidae	Orbicella	Orbicella annularis	yes	1	32	yes	0	NA	GAGAGTTAAAAAGTACGTGAAACCGTTGAAATGGAAACGAATGGGCTCAGCAATGCGCCGTTTGAGATTCAGCCGGTGGGTGGGATCGACGGCGGGTTTGCGGATCTGAATGGACCGCGGCCCGGTGCTCGTTTCTCCCCACCGTCGCACTTCTCTTGGGCGCGCGTCAACGTCGGTTGGGACTGGGTCTGAAAGGTGCCGGGAAGGTAGGTGTGGGCCTCCGGGTCCGTGCTGTTACAGCCCGGTTCTCTCATGGCTCGGGCCCGACCGAGGAGTTGCAGGGCATGCCTCCTGTGGCTAGGGTCCCCTCCCTCCGGCCGGCTGTCCAATGCGGTGGACTGCTTGCAGTGCTCGGCGAACGCTGCCGGTCGTTGGGGTGGTGATCTCGTACCATGCCCT…
Quattrini et al. 2020, Nature Ecology & Evolution	PP073638	NA	Animalia	Cnidaria	Anthozoa	Scleractinia	Merulinidae	Orbicella	Orbicella franksi	yes	1	32	yes	0	NA	GAGAGTTAAAAAGTACGTGAAACCGTTGAAATGGAAACGAATGGGCTCAGCAATGCGCCGTTTGAGATTCAGCCGGTGGGTGGGATCGACGGCGGGTTTGCGGATCTGAATGGACCGCGGCCCGGTGCTCGTTTCTCCCCACCGTCGCACTTCTCTTGGGCGCGCGTCAACGTCGGTTGGGACTGGGTCTGAAAGGTGCCGGGAAGGTAGGTGTGGGCCTCCGGGTCCGTGCTGTTACAGCCCGGTTCTCTCATGGCTCGGGCCCGACCGAGGAGTTGCAGGGCATGCCTCCTGTGGCTAGGGTCCCCTCCCTCCGGCCGGCTGTCCAATGCGGTGGACTGCTTGCAGTGCTCGGCGAACGCTGCCGGTCGTTGGGGTGGTGATCTCGTACCATGCCCT…
Quattrini et al. 2020, Nature Ecology & Evolution	PP073639	NA	Animalia	Cnidaria	Anthozoa	Scleractinia	Meandrinidae	Dendrogyra	Dendrogyra cylindrus	yes	0	NA	yes	0	NA	GAGAGTTAAAAAGTACGTGAAACCGTTGAAAGGGAAACGAATGGACTCAGCAATGCGCCGTTTGAGATTCAGCCGGTGGGTGGGATCGGCTCGGGGTTTGCGGATCTGAATGGACCGCGGCCTTGGGCTCGTTTCTCCTCGCCGTCGCACTTCTCTTGGGCGCGCGTCAACGTCGGTTGGGACTGGGTCTGAAAGGTGCCGGGAAGGTAGGTCTGGACCTCCGGGTCCGGTCTGTTACAGCCCGGTTCTCTCATGGCTCGGGTCCGACCGAGGAGTTGCAGCGCATGCCTCTTGTGGCTAGGGTGCCGTCCTTCCGGCCGGTTGTCGAATGTGGTGGACTGCTTGCAGTGCTCCGCGACTGCTGCCGGTCGTTGGGGTGGTGATCTCGTACCATGCGCT…
Quattrini et al. 2020, Nature Ecology & Evolution	PP073640	NA	Animalia	Cnidaria	Anthozoa	Scleractinia	Meandrinidae	Eusmilia	Eusmilia fastigiata	yes	0	NA	yes	0	NA	GAGAGTTAAAAAGTACGTGAAACCGTTGAAAGGGAAACGAATGGACTCAGCAATGCGCCGTTTGAGATTCAGCCGGTGGGTGGGATCGGCTCGGGGTTTGCGGATCTGAATGGACCGCGGCCTTGGGCTCGTTTCTCCTCGCCGTCGCACTTCTCTTGGGCGCGCGTCAACGTCGGTTGGGACTGGGTCTGAAAGGTGCCGGGAAGGTAGGTCTGGACCTCCGGGTCCGGTCTGTTACAGCCCGGTTCTCTCATGGCTCGGGCCCGACCGAGGAGTGGCAGCGCATGCCTCTTGTGGCTAGGGTGCCGTCCTTCCGGCCGGTTGTCGAATGCGGTGGACTGCTTGCAGTGCTCCGCGACCGCTGCCGGTCGTTGGGGTGGTGATCTCGTACCATGCGCT…
Quattrini et al. 2020, Nature Ecology & Evolution	PP073641	NA	Animalia	Cnidaria	Anthozoa	Scleractinia	Pocilloporidae	Stylophora	Stylophora pistillata	yes	1	27	yes	0	NA	GAGAGTTAAAAAGTACGTGAAACCGTCAGAAGGGAAACGAATGGACTCAGCAATGCTCCCTTCGAGATTCAGCCGGTGGCCTTCGGCGGCGCGGGGCTTGCGGATCCGAACGGACCGCGGTCTCGTGCCCGTCGGGGGTCCGCCGTCGCACTTCTCTTGGGCGCGCGTCAGCGTGGGTCGGAACTGGGTGTCGGAGGTGCCGCGGAAGGTAGGTCTGGGGTCTCGGCTCTGGACTGTTACAGCCCGGCTCCCGCGACTCGGGTCCGACCGAGGACGTCGCAGCGCGTGCCTCTTGTGGCTAGGGTCCCGTCCTTCCGGCCGGTCGTCGACCGCGGTGGACTGCTTGCAGTGCTCTGCGACTGCTGCCGGTCGTTGGGGCGGTGTGCTCGTACGACGCGC…
Quattrini et al. 2020, Nature Ecology & Evolution	PP073642	NA	Animalia	Cnidaria	Anthozoa	Scleralcyonacea	Isidoidae	Isidoides	Isidoides armata	yes	0	NA	no	NA	NA	GAGAGTTAAAAAGTGCGTGAAACCGCTGGAAGGGAAGCGAATGGAGTCGGCAAAGCACCGGAGCAGATTCAGTCACGCTCGTCTCGCCACGCACTTGTAATACGCGATCTTTCCAGACGCAACTTGTGCGACGTGGTATTGGCGTGGCGCACTTCTGCCAGGTGAACGTCAACGTCAGTTCATTGCGAGTGAGAAGGCCACGAGGTCGGTAGGTCCCCACGCTGGGATTGGTAAGACTCGTGTGCGCACTGCTCGCCGTGGGCTGTGTCCCGACGCAGTGCGTGCCTCGCTCTTGGAGCAGGCTGCAGTCTCGTCACACGTCCGGTGATCGTGCTAAACGGACGGCTATGCCTGTGCGTCGCGAGCACGGCCGGTCGGGCGACAAGGGAAACGGACACG…
Quattrini et al. 2020, Nature Ecology & Evolution	PP073643	NA	Animalia	Cnidaria	Anthozoa	Malacalcyonacea	Xeniidae	Caementabunda	Caementabunda simplex	yes	0	NA	no	NA	NA	GAGAGTTAAAAAGTACGTGAAACCGTTGAAAGGGAAGCGAATGGAGTTAGCAATTCGTCTGTCAGATTCAGTCGCTTACGCGTCACGACGTGCGCGCTCCCGATCCGAACGGACGAGTCGTGCACGGATGCGACGTGCGAGCGGCGCACTTCTGGCAGGCGAGCGTCAGCGTCGGTTGTTGTCGAACGACAAGGTTGCAGGGAAGGTAGACGTGCCCTCGTGGCTCGTTGTTAAGCCTTGCTATCGCATAGTTCGATGGCGACCGTGGCACTGCGACGCGTGCCTGGCTGGCGACTCAATTTCTCGGTCCAACATGTCGACCGTGGCGGACGGCACGCCTGTGCGCTCAAACTGCTGTTGGCCGTGAGATTGATGTTCGCACACTACGCGTCAAGGATG…
Quattrini et al. 2020, Nature Ecology & Evolution	PP073644	NA	Animalia	Cnidaria	Anthozoa	Malacalcyonacea	Sarcophytidae	Sclerophytum	Sclerophytum wanannense	yes	0	NA	no	NA	NA	GAGAGTTAAAAAGTACGTGAAACCGTTGAAAGGGAAGCGAATGGAGTTAGCAATTCGCCCTGCCAGATTCAGTTTTTCGCACTTCGCGACGTGCACGCTCTCGATCCGCATGGACGAGACGTGCACGGACGCGACGTGTGGACGGCGCACTTCTGGCGGGCGAGCGTCAGCGTCGCTCGTCGACGGGCGACAAGGTCGCGAGGAAGGTAGACGTGCCTTCGGGCGCGTTGTTAAGACTCGCGTTCGCATGGCTCGACGACGACCGTGGCTCCTTCATGCGGAGGCGACGCGTGCCTGGCTGGCGACTCGTGCGATCGGTCCGGCATGTCGACCGTGGCGGACGGCACGCCTGTGCGCTCGAACTGCTGCCGGTCGCTCGCACGATGTTCGCACACTACG…
Quattrini et al. 2020, Nature Ecology & Evolution	PP073645	NA	Animalia	Cnidaria	Anthozoa	Malacalcyonacea	Sarcophytidae	Sclerophytum	Sclerophytum acutum	yes	0	NA	no	NA	NA	GAGAGTTAAAAAGTACGTGAAACCGTTGAAAGGGAAGCGAATGGAGTTAGCAATTCGCCCTGCCAGATTCAGTTGTTCGCACTTCGCGACGTGCACGCTCTCGATCCGCATGGACGAGACGTGCACGGACGCGACGTGTGGACGGCGCACTTCTGGCGGGCGAGCGTCAGCGTCGGTCGTCGACGGGCGACAAGGTCGCGAGGAAGGTAGACGTGCCTTCGGGCGCGTTGTTAAGACTCGCGTTCGCATGGCTCGACGACGACCGTGGCTCCTTCATGCGGAGGCGACGCGTGCCTGGCTGGCGACTCGTGCGATCGGTCCGGCATGTCGACCGTGGCGGACGGCACGCCTGTGCGCTCGAACTGCTGCCGGTCGCTCGCACGATGTTCGCACACTACG…
Quattrini et al. 2020, Nature Ecology & Evolution	PP073646	NA	Animalia	Cnidaria	Anthozoa	Scleralcyonacea	Ellisellidae	Dichotella	Dichotella gemmacea	no	NA	NA	no	NA	NA	GAGAGTTAAAAAGTACGTGAAACCGTTGAAAGGGAAGCGAATGGAGTTAGCAATTCGCCCTGCCAGATTCAGTCTTACGCGTTCCGCGACAGGCGCGCACTCGATCTACGTAGACGAGTCGTGTTCGCACGCGGCACGGGAAAGGCGCATTTATGGCGGGCGAGCGTCAACGTCGGTCTTCGTCGAGCTAAAAGGCCGTGAGGGAGGTGAACAGCCTTCGGGTTGTTGTTATAACCTCGCCAGCGTATCGCTTGACGAAGACCGTGGAGTCGCGGCGCGTGCTTCCTTCCGGGGGGGCTGGTGTCCTGTTTTGTTGGGCCGGTTGTCGACCGTGGCGGACGGCACGCCTGTGCGCTCGAACTGCTGCCGGTCAACAGGGCGGTGATCACACACTA
Quattrini et al. 2020, Nature Ecology & Evolution	PP073647	NA	Animalia	Cnidaria	Anthozoa	Scleractinia	Agariciidae	Pavona	Pavona decussata	yes	0	NA	yes	0	NA	GAGAGTTAAAAAGTACGTGAAACCGTTGGAAGGGAAACGAATGGACTCAGCAATGCGCCGTTTGAGATTCAGCCGGCGGGTAGTGCCGGCCCGGGGTTTGCGGATCTGAATGGACCGCGGTCCCGGGCTCGGAGCTCCCGGTCGTCGCACTTCTCTTGGGCGCGCGTCAACGTCGGTTGGGACTGGGTCTGAAAGGTGCCGGAAAGGTAGGTCTGTGCGTCCCTTCGGGGTCGCTCGGTCTGTTACAGCCCGGTTCTCCTCGCGGCTCGGGCCCGACCGAGGCGGTGCAGCGCATGCCTCTCGTAAGGCTAGGGTCCCGTCCCTCCGGCCGGTTGTCGAATGTGGTGGACTGCTTGCAGTGCTCCGCGATTGCTGCCGGTCGTTGGGGTGGTGATCTCG…
Quattrini et al. 2020, Nature Ecology & Evolution	PP073648	NA	Animalia	Cnidaria	Anthozoa	Scleractinia	Cladocoridae	Cladocora	Cladocora sp.	yes	0	NA	yes	0	NA	GAGAGTTAAAAAGTACGTGAAACCGTTGAAAGGGAAACGAATGGACTCAGCAATGCGCCGTTTGAGATTCAGCCGGTGGGCGGGATCGGCGTGGGGTTTGCGGATCTGAATGGACCGCGGCTTCTCGCTCGTTTCTCCTCGCCGTCGCACTTCTCTTGGGCGCGCGTCAACGTCGGTTGGGACTGGGTCTGAAAGGTACCGGGAAGGTAGGTCTGGACCTTCGGGTTGGGACTGTTACAGCCCGGTTCTCTCATGGCTCGGGCCTGACCGAGGAGTCGCAGCGCATGCCTCTTGTGGCTAGGGTGCCGTCCTTCCGGCCGGTTGTCGAACGTGGTGGACTGCTTGCAGTGCTCCGCGACTGCTGCCGGTCGTTGGGGTGGTGATCTCGTACCATGCGCT…
Quattrini et al. 2020, Nature Ecology & Evolution	PP073649	NA	Animalia	Cnidaria	Anthozoa	Scleractinia	Oculinidae	Oculina	Oculina varicosa	yes	0	NA	yes	0	NA	GAGAGTTAAAAAGTACGTGAAACCGTTGAAAGGGAAACGAATGGACTCAGCAATGCGCCGTTTGAGATTCAGCCGGTGGGCGGGATCGGCGCGGGGTTTGCGGATCTGAATGGACTGCGGCTTCGTGCTCGTTTCTCCTCGCCGTCGCACTTCTCTTGGGCGCGCGTCAACGTCGGTTGGGACTGGGTTTGAAAGGTGCCGGGAAGGTAGGTCTGGACCTTCGGGTTCGGTCTGTTACAGCCCGGTTCTCTCATGGCTCGGGCCCGACCGAGGAGTCGCAGCGCATGCCTCTTGTGGCTAGGGTGCCGTCCTTCCGGCCGGTTGTCGAACGTGGTGGACTGCTTGCAGTGCTCCGCGACTGCTGCCGGTCGTTGGGGTGGTGATCTCGTACCATGCGCT…
Quattrini et al. 2020, Nature Ecology & Evolution	PP073650	NA	Animalia	Cnidaria	Anthozoa	Scleractinia	Oculinidae	Oculina	Oculina cf. varicosa	yes	0	NA	yes	0	NA	GAGAGTTAAAAAGTACGTGAAACCGTTGAAAGGGAAACGAATGGACTCAGCAATGCGCCGTTTGAGATTCAGCCGGTGGGCGGGATCGGCGCGGGGTTTGCGGATCTGAATGGACTGCGGCTTCGTGCTCGTTTCTCCTCGCCGTCGCACTTCTCTTGGGCGCGCGTCAACGTCGGTTGGGACTGGGTTTGAAAGGTGCCGGGAAGGTAGGTCTGGACCTTCGGGTTCGGTCTGTTACAGCCCGGTTCTCTCATGGCTCGGGCCTGACCGAGGAGTCGCAGCGCATGCCTCTTGTGGCTAGGGTGCCGTCCTTCCGGCCGGTTGTCGAACGTGGTGGACTGCTTGCAGTGCTCCGCGACTGCTGCCGGTCGTTGGGGTGGTGATCTCGTACCATGCGCT…
Quattrini et al. 2020, Nature Ecology & Evolution	PP073651	NA	Animalia	Cnidaria	Anthozoa	Scleractinia	Poritidae	Porites	Porites astreoides	yes	1	28	yes	0	NA	GAGAGTTAAAAAGTACGTGAAACCGTTTGAAGGGAAACGAATGGACTCAGCAATGCGCCCTTTGAGATTCAGCCGGGCGGTTGTGGCGGTCCGGGGCTTGCGGATCTGAATGGACCGCGGTCTCGGGCCCGTCGCTTCCGACCGTCGCACTTCTCTTGGACGCGAGTCAACGTCGGTTGGGACTGGGCCTCAAAGGTTCCGGGAAGGTAGGTCCGGACGCTCGCGTTCGGACTGTTACAGCCCGGTTCTCTCGCGGCTCGGGCCCGACCGAGGCGGATGCAGCACATGCCTCTTCTGGCTAGGGTCCCGTCCTTCCGGCCGGTTGTCGAATGCGGTGGACTGCTTGCAGTGCTCTGCGACTGCTGCCGGTCGTTGGGGTGGTGATCTCGTACCATGTGC…
Quattrini et al. 2020, Nature Ecology & Evolution	PP073652	NA	Animalia	Cnidaria	Anthozoa	Scleractinia	Dendrophylliidae	Balanophyllia	Balanophyllia elegans	yes	0	NA	yes	0	NA	GAGAGTTAAAAAGTACGTGAAACCGTTGGAAGGGAAACGAATGGACTAAGCAACGCGCCTTCTTGAGATTCAGCCGGCCGGAGGGTCCGGCTCGGGGTTTGCGGATCCGAACGGACCGCAGCCCCGGGTCCGTTCCTCCCGGCCGTCGCACTTCTCTCGGGCGCACGTCAACGTCGGTCGGGACTGGGTCTGAAAGGTTCCGGGAAGGTAGGTCCGCGCGCGCCTCGCGTGCGCGCGTTCCGCTACAGCCCGGTTCCGTCTCGGCTCGGGCCCGACCGAGGCGGTCGCAGCGCATGCCTCTTTTGGCTAGGGTCCCGTCCGTCCGGCCGGTCGTCGACCGCGGTGGACTGCTTGCAGTGCTCCGCGACCGCTGCCGGTCGTTGGGGCGGTGATCTCGTA…
Quattrini et al. 2020, Nature Ecology & Evolution	PP073653	NA	Animalia	Cnidaria	Anthozoa	Scleractinia	Poritidae	Porites	Porites panamensis	yes	1	28	yes	0	NA	GAGAGTTAAAAAGTACGTGAAACCGTTTGAAGGGAAACGAATGGACTCAGCAATGCGCCCTTTGAGATTCAGCCGGGCGGTTGTGGCGGTGCGGGGCTTGCGGATCTGAATGGACCGCGGTCTCGGGCCCGTCGCTTCCGACCGTCGCACTTCTCTTGGACGCGAGTCAACGTCGGTTGGGACTGGGCCTCAAAGGTTCCGGGAAGGTAGGTCGGGACGCTCGCGTTCGGACTGTTACAGCCCGGTTCTCCATTTCCGGCTCGGGCCCGACCGAGGCAGATGCAGCACATGCCTCTTCTGGCTAGGGTCCCGTCCTTCCGGCCGGTTGTCGAATGCGGTGGACTGCTTGCAGTGCTCTGCGATTGCTGCCGGTCGTTGGGGTGGTGATCTCGTACCATG…
Quattrini et al. 2020, Nature Ecology & Evolution	PP073654	NA	Animalia	Cnidaria	Anthozoa	Malacalcyonacea	Plexauridae	Eunicea	Eunicea flexuosa	yes	0	NA	no	NA	NA	GAGAGTTAAAAAGTACGTGAAACCGTTGAAAGGGAAGCGAATGGAGTTAGCAATTCGCCCTGCCAGATTCAGTTGCCCGCGCTCCGCGACGCGCGCGCCCTCGATCCGCATGGACGAGGCGCTCGCGGGCGCGGCGTGCGGGCGGCGCACTTCTGGCGAGCGAGCGTCAGCGTCGCTTGGCGTCGGGCGACAAGGACCCGAGGAAGGTGGGCCGGCCCTCGCGGCCGGTTGTTAAGCCTCGGGCTCGCACGGCCCGGCCGCCGAGCGTGGCAATGGTTATCTGCGACGCGTGCCTCTGTTGCTGGCGACTCGCACGATCGGTCCGGCATGTCGACCGTGGCGGACGGCACGCCTGTGCGCTCGAACTGCTGCCGGTCGATCGGACGATGTTCGCACACT…
Quattrini et al. 2020, Nature Ecology & Evolution	PP073655	NA	Animalia	Cnidaria	Anthozoa	Malacalcyonacea	Alcyoniidae	Alcyonium	Alcyonium acaule	yes	0	NA	no	NA	NA	GAGAGTTAAAAAGTACGTGAAACCGTTGAAAGGGAAGCGAATGGAGTTAGCAATTCGCCCTGCCAGATTCAGTTGCTCGTGCGCCGCGACGTGCGCGCTCTCGATCCGCATGGACGAGACGTGTGCGGGTGCGGCGCTCGGACGGCGCACTTCTGGCGGGCGAGCGTCAGCGTCGGTTGTCGACGGGCGATAAGGACGCGAGGAAGGTGGATCGGCCCACGGGCCGTTTGTTAAGCCTTGCGCTCGTATAGCTCGACGGCGACTGTGGCTCGAAGAGGCGACGCGTGCCTAGCTGGTGACTCGTGCGATCGGTCCGGCATGTCGACCGTGGCGGACGGCACGCCTGTGCGCTCGAACTGCTGCCGGTCGATCGTGAGATGTTCGCACACTACGCGTCGA…
Quattrini et al. 2020, Nature Ecology & Evolution	PP073656	NA	Animalia	Cnidaria	Anthozoa	Scleractinia	Oculinidae	Oculina	Oculina patagonica	yes	0	NA	yes	0	NA	GAGAGTTAAAAAGTACGTGAAACCGTTGAAAGGGAAACGAATGGACTCAGCAATGCGCCGTTTGAGATTCAGCCGGTGGGCGGGATCGGCGTTGGGTTTGCGGATCTGAATGGACTGCGGCCTGGCGCTCGTTTCTGCTCGCCGTCGCACTTCTCTTGGGCGCGCGTCAACGTCGGTTGGGACTGGGTTTGAAAGGTGCCGGGAAGGTAGGTCTGGACCTTCGGGTTCGGTCTGTTACAGCCCGGTTCTCTCATGGCTCGGGCCCGACCGAGGAGTCGCAGCGCATGCCTCTTGTGGCTAGGGTGCCGTCCTTCCGGCCGGTTGTCGAACGTGGTGGACTGCTTGCAGTGCTCCGCGACTGCTGCCGGTCGTTGGGGTGGTGATCTCGTACCATGCGCT…
Quattrini et al. 2020, Nature Ecology & Evolution	PP073657	NA	Animalia	Cnidaria	Anthozoa	Scleractinia	Oculinidae	Oculina	Oculina patagonica	yes	0	NA	yes	0	NA	GAGAGTTAAAAAGTACGTGAAACCGTTGAAAGGGAAACGAATGGACTCAGCAATGCGCCGTTTGAGATTCAGCCGGTGGGCGGGATCGGCGTTGGGTTTGCGGATCTGAATGGACTGCGGCCTGGCGCTCGTTTCTCCTCGCCGTCGCACTTCTCTTGGGCGCGCGTCAACGTCGGTTGGGACTGGGTTTGAAAGGTGCCGGGAAGGTAGGTCTGGACCTTCGGGTTCGGTCTGTTACAGCCCGGTTCTCTCATGGCTCGGGCCCGACCGAGGAGTCGCAGCGCATGCCTCTTGTGGCTAGGGTGCCGTCCTTCCGGCCGGTTGTCGAACGTGGTGGACTGCTTGCAGTGCTCCGCGACTGCTGCCGGTCGTTGGGGTGGTGATCTCGTACCATGCGCT…
Quattrini et al. 2020, Nature Ecology & Evolution	PP073658	NA	Animalia	Cnidaria	Anthozoa	Scleractinia	Oculinidae	Oculina	Oculina patagonica	yes	0	NA	yes	0	NA	GAGAGTTAAAAAGTACGTGAAACCGTTGAAAGGGAAACGAATGGACTCAGCAATGCGCCGTTTGAGATTCAGCCGGTGGGCGGGATCGGCGTGGGGTTTGCGGATCTGAATGGACTGCGGCCTGGCGCTCGTTTCTGCTCGCCGTCGCACTTCTCTTGGGCGCGCGTCAACGTCGGTTGGGACTGGGTTTGAAAGGTGCCGGGAAGGTAGGTCTGGACCTTCGGGTTCGGTCTGTTACAGCCCGGTTCTCTCATGGCTCGGGCCCGACCGAGGAGTCGCAGCGCATGCCTCTTGTGGCTAGGGTGCCGTCCTTCCGGCCGGTTGTCGAACGTGGTGGACTGCTTGCAGTGCTCCGCGACTGCTGCCGGTCGTTGGGGTGGTGATCTCGTACCATGCGCT…
Quattrini et al. 2020, Nature Ecology & Evolution	PP073659	NA	Animalia	Cnidaria	Anthozoa	Scleractinia	Oculinidae	Oculina	Oculina varicosa deep	yes	0	NA	yes	0	NA	GAGAGTTAAAAAGTACGTGAAACCGTTGAAAGGGAAACGAATGGACTCAGCAATGCGCCGTTTGAGATTCAGCCGGTGGGCGGGATCGGCGTTGGGTTTGCGGATCTGAATGGACTGCGGCCTGGCGCTCGTTTCTGCTCGCCGTCGCACTTCTCTTGGGCGCGCGTCAACGTCGGTTGGGACTGGGTTTGAAAGGTGCCGGGAAGGTAGGTCTGGACCTTCGGGTTCGGTCTGTTACAGCCCGGTTCTCTCATGGCTCGGGCCCGACCGAGGAGTCGCAGCGCATGCCTCTTGTGGCTAGGGTGCCGTCCTTCCGGCCGGTTGTCGAACGTGGTGGACTGCTTGCAGTGCTCCGCGACTGCTGCCGGTCGTTGGGGTGGTGATCTCGTACCATGCGCT…
Quattrini et al. 2020, Nature Ecology & Evolution	PP073660	NA	Animalia	Cnidaria	Anthozoa	Scleractinia	Oculinidae	Oculina	Oculina varicosa deep	yes	0	NA	yes	0	NA	GAGAGTTAAAAAGTACGTGAAACCGTTGAAAGGGAAACGAATGGACTCAGCAATGCGCCGTTTGAGATTCAGCCGGTGGGCGGGATCGGCGTTGGGTTTGCGGATCTGAATGGACTGCGGCCTGGCGCTCGTTTCTGCTCGCCGTCGCACTTCTCTTGGGCGCGCGTCAACGTCGGTTGGGACTGGGTTTGAAAGGTGCCGGGAAGGTAGGTCTGGACCTTCGGGTTCGGTCTGTTACAGCCCGGTTCTCTCATGGCTCGGGCCCGACCGAGGAGTCGCAGCGCATGCCTCTTGTGGCTAGGGTGCCGTCCTTCCGGCCGGTTGTCGAACGTGGTGGACTGCTTGCAGTGCTCCGCGACTGCTGCCGGTCGTTGGGGTGGTGATCTCGTACCATGCGCT…
Quattrini et al. 2020, Nature Ecology & Evolution	PP073661	NA	Animalia	Cnidaria	Anthozoa	Scleractinia	Poritidae	Porites	Porites divaricata	yes	1	28	yes	0	NA	GAGAGTTAAAAAGTACGTGAAACCGTTTGAAGGGAAACGAATGGACTCAGCAATGCGCCCTTTGAGATTCAGCCGGGCGGTTGTGGCGGTGCGGGGCTTGCGGATCTGAATGGACCGCGGTCTCGGGCCCGTTGCTTCCGACCGTCGCACTTCTCTTGGACGCGAGTCAACGTCGGTTGGGACTGGGCCTCAAAGGTTCCGGGAAGGTAGGTCGGGACGCTCGCGTTCGGACTGTTACAGCCCGGTTCTCTCCCGGCTCGGGCCCGACCGAGGCGGATGCAGCACATGCCTCTTCTGGCTAGGGTCCCGTCCTTCCGGCCGGTTGTCGAATGCGGTGGACTGCTTGCAGTGCTCTGCGATTGCTGCCGGTCGTTGGGGTGGTGATCTCGTACCATGTGC…
Quattrini et al. 2020, Nature Ecology & Evolution	PP073662	NA	Animalia	Cnidaria	Anthozoa	Scleractinia	Oculinidae	Oculina	Oculina robusta	yes	0	NA	yes	0	NA	GAGAGTTAAAAAGTACGTGAAACCGTTGAAAGGGAAACGAATGGACTCAGCAATGCGCCGTTTGAGATTCAGCCGGTGGGCGGGATCGGCGCGGGGTTTGCGGATCTGAATGGACCGCGGCCTGGCGCTCGTTTCTGCTCGCCGTCGCACTTCTCTTGGGCGCGCGTCAACGTCGGTTGGGACTGGGTTTGAAAGGTGCCGGGAAGGTAGGTCTGGACCTTCGGGTTCGGTCTGTTACAGCCCGGTTCTCTCATGGCTCGGGCCCGACCGAGGAGTCGCAGCGCATGCCTCTTGTGGCTAGGGTGCCGTCCTTCCGGCCGGTTGTCGAACGTGGTGGACTGCTTGCAGTGCTCCGCGACTGCTGCCGGTCGTTGGGGTGGTGATCTCGTACCATGCGCT…
Quattrini et al. 2020, Nature Ecology & Evolution	PP073663	NA	Animalia	Cnidaria	Anthozoa	Scleractinia	Poritidae	Porites	Porites sverdrupi	yes	1	28	yes	0	NA	GAGAGTTAAAAAGTACGTGAAACCGTTTGAAGGGAAACGAATGGACTCAGCAATGCGCCCTTTGAGATTCAGCCGGGCGGTGGTGGCGGTGCGGGGCTTGCGGATCTGAATGGACCGCGGTCTCGGGCCCGTGGCCTCCGACCGTCGCACTTCTCTTGGACGCGAGTCAACGTCGGTTGGGACTGGGCCTCAAAGGTTCCGGGAAGGTAGGTCGGGACGCTCGCGTTCGGACTGTTACAGCCCGGTTCTCTCCCGGCTCGGGCCCGACCGAGGCAGATGCAGCACATGCCTCTTGTGGCTAGGGTCCCGTCCTTCCGGCCGGTTGTCGAATGCGGTGGACTGCTTGCAGTGCTCTGCGATTGCTGCCGGTCGTTGGGGTGGTGATCTCGTACCATGTGC…
Quattrini et al. 2020, Nature Ecology & Evolution	PP073664	NA	Animalia	Cnidaria	Anthozoa	Malacalcyonacea	Alcyoniidae	Alcyonium	Alcyonium digitatum	yes	0	NA	no	NA	NA	GAGAGTTAAAAAGTACGTGAAACCGTTGAAAGGGAAGCGAATGGAGTTAGCAATTCGCCCTGCCAGATTCAGTTGCCCGTGCGCCGCGACGTGCGCGCTCTCGATCCGCATGGACGAGACGTGTGCGGGTGCGGCGCTCGGACGGCGCACTTCTGGCGGGCGAGCGTCAGCGTCGGTTGCCGACGGGCGACAAGGACGCAAGGAAGGTGGACCTGCCCTCGGGACGGTTGTTACAGCCTTGCGCTCGTATAGCTCGACGGCGACCGTGGCTCTTAGAGGCGACGCGTGCCTAGCTGGTGACTCGAACGATCGGTCTGGCATGTCGACTGTGGCGGACGGCACGCCTGTGCGCTCGAACTGCTGCCGGTCGATCGTGCGATGTTCGCACACTACGCGTCG…
Quattrini et al. 2020, Nature Ecology & Evolution	PP073665	NA	Animalia	Cnidaria	Anthozoa	Malacalcyonacea	Alcyoniidae	Alcyonium	Alcyonium haddoni	yes	0	NA	no	NA	NA	GAGAGTTAAAAAGTACGTGAAACCGTTGAAAGGGAAGCGAATGGAGTTAGCAATTCGCCCTGCCAGATTCAGTTGCTCGTGCTTCGCGACGTGCGCGCTCTCGATCCGCATGGACGAGACGAGTACGGGCGCGACGCTCGGACGGCGCACTTCTGGCGGGCGAGCGTCAGCGTCGGTTGTCGACGGGCGACAAGGATGCAAGGAAGGTGGGCTGGCCTTCGGGCCGGTTGTTAAGCCTTGCGCTCGTATAGCTCGACGGCGACCGTGGCTCAAAGAGGCGACGCGTGCCTAGCTGGCGACTCGAACGATCGGTCTGGCATGTCGACTGTGGCGGACGGCACGCCTGTGCGCTCGAACTGCTGCCGGTCGATCGTCCGATGTTCGCACACTACGCGTCGA…
Quattrini et al. 2020, Nature Ecology & Evolution	PP073666	NA	Animalia	Cnidaria	Anthozoa	Scleractinia	Dendrophylliidae	Enallopsammia	Enallopsammia rostrata	yes	0	NA	yes	0	NA	GAGAGTTAAAAAGTACGTGAAACCGTTGGAAGGGAAACGAATGGACTAAGCAACGCGCCGCTTGAGATTCAGCCGGCCAGGTGTCTTCGGGTCGGGGTTTGCGGATCCGAATGGACCGCGGTCCCGCGCTCGTTTTCCCCGGCCGTCGCACTTCTCTTGGGCGCACGTCAACGTCGGTTGGGACTGGGTCTGAAAGGTTCCGGGAAGGTAGGTCCGCGCGTTCCTCGCGTCCGCGCGGTCTGTTACAGCCCGGTTCTCTTTGCGGCTCGGGCCCGACCGAGGCGGTCGCAGCGCATGCCTCTTTTGGCTAGGGTCCCGCCCGTCCGGCCGGTTGTCGACCGCGGTGGACTGCTTGCAGTGCTCCGCGACTGCTGCCGGTCGTTTGGGTGGTGATCTCGT…
Quattrini et al. 2020, Nature Ecology & Evolution	PP073667	NA	Animalia	Cnidaria	Anthozoa	Scleralcyonacea	Coralliidae	Anthomastus	Anthomastus sp.	yes	0	NA	no	NA	NA	GAGAGTTAAAGAGTACGTGAAACCGTTGAAAGGGAAGCGAATGGAGTTAGCAATTCGCCACGCCAGATTCAGCCATTGGCGCGCCACGCGGCGCCCGAACTCGATCTTCGTAGACGAGGCGGGCGCGGGCGTGGCGCGACGGTGGCGCACTTCCGGCGGGCGAGCGTCAACGACGGTTGCCTGCTGCCGACTAGAAGGCCGTGGGGAAGGTGGACCCGTCTTCGGGCGGGTTGTTACAGCCCCGCGATCGCATGGTCGGCGGGCGACCGTGGAAGAAATAAAAGCGCCGCGACGCGTGCCTCCTCAGCGATGATGGGGCTGGTGTCCTGTTTTGTTGGTCCGGCTGTCGACCGCGGCGGACGGCTCGCCAGTGCGCCCAAACTGCTGCCGGTCAACAGG…
Quattrini et al. 2020, Nature Ecology & Evolution	PP073668	NA	Animalia	Cnidaria	Anthozoa	Antipatharia	Antipathidae	Antipathes	Antipathes atlantica	yes	0	NA	no	NA	NA	GAGAGTTAAAAAGTACGTGAAACCGTTGAAAGGGAAACGAATGGAGCTAGCAATGCACCCTGCGAGATTCAGCCGGTGGGCGGCGTGGCCGTGCGGTTCGCAGATCCGAATCGACTGTGGCCGTGCGGTTCGCGTCCCCCGCCGTCGCACTTCTCGCGGGTGCGCGTCAACATGGATCGGAACCGGGTCTCACAGGCGTCGGCAAGGTAGGTCCGTCCTCTCGGGGATGTTCTGTTATAGGCCGGCGTTCTCGCGGCTCGGGTCCGATCGAGGAGTCGCAGCACATGCCTCTCGGGGCTGGGGTCCCGTCTCTCCGGTTGGTTGTCGACCGCGGTGGACTGCTTGCAGTGCACCGCAACTGCTGCCGGTCGCTGGGGCGGTGACGTCGCACTATGTGCT…
Quattrini et al. 2020, Nature Ecology & Evolution	PP073669	NA	Animalia	Cnidaria	Anthozoa	Antipatharia	Schizopathidae	Telopathes	Telopathes magna	yes	0	NA	no	NA	NA	GAGAGTTAAAAAGTACGTGAAACCGTTAAAAGGGAAACGAATGGAGCTAGCAATGCACCCAGTGAGATTCAGCTGGTTGGTGATTCGGCCGCGATGTTTGCAGATCTGAATTGACTGCGGCATTGTGGTTCGAACTCCCTGCCATCGCACTTCTCGCGGGCGCGCGTCAACATGGGTTGGGACCGGGTCTAAACGGCACCGGCAAGGTAGGTCCGCACCTCCGGGTACGTACTGTTCTAGGCCGGCGCACTCGCGGCCCGGACCCGACCGAGGCGATGCAGCACATGCCTCTTGTGGCTGGAGTCCCGTTCTTCCGGTTGGTTGTCGACTGTGGTGGACTGCGTGCAGTGCACCGCGACTGCTGCCGGTCGCTTGGGCGGCGACTTCGCATGATGTGCT…
Quattrini et al. 2020, Nature Ecology & Evolution	PP073670	NA	Animalia	Cnidaria	Anthozoa	Scleractinia	Poritidae	Porites	Porites porites	yes	1	28	yes	0	NA	GAGAGTTAAAAAGTACGTGAAACCGTTTGAAGGGAAACGAATGGACTCAGCAATGCGCCCTTTGAGATTCAGCCGGGCGGTTGTGGCGGTGCGGGGCTTGCGGATCTGAATGGACCGCGGTCTCGGGCCCGTTGCTTCCGACCGTCGCACTTCTCTTGGACGCGAGTCAACGTCGGTTGGGACTGGGCCTCAAAGGTTCCGGGAAGGTAGGTCGGGACGCTCGCGTTCGGACTGTTACAGCCCGGTTCTCTCCCGGCTCGGGCCCGACCGAGGCGGATGCAGCACATGCCTCTTCTGGCTAGGGTCCCGTCCTTCCGGCCGGTTGTCGAATGCGGTGGACTGCTTGCAGTGCTCTGCGATTGCTGCCGGTCGTTGGGGTGGTGATCTCGTACCATGTGC…
Quattrini et al. 2020, Nature Ecology & Evolution	PP073671	NA	Animalia	Cnidaria	Anthozoa	Scleractinia	Poritidae	Porites	Porites cf. colonensis	yes	1	28	yes	0	NA	GAGAGTTAAAAAGTACGTGAAACCGTTTGAAGGGAAACGAATGGACTCAGCAATGCGCCCTTTGAGATTCAGCCGGGCGGTTGTGGCGGTGCGGGGCTTGCGGATCTGAATGGACCGCGGTCTCGGGCCCGTTGCTTCCGACCGTCGCACTTCTCTTGGACGCGAGTCAACGTCGGTTGGGACTGGGCCTCAAAGGTTCCGGGAAGGTAGGTCGGGACGCTCGCGTTCGGACTGTTACAGCCCGGTTCTCTCCCGGCTCGGGCCCGACCGAGGCGGATGCAGCACATGCCTCTTCTGGCTAGGGTCCCGTCCTTCCGGCCGGTTGTCGAATGCGGTGGACTGCTTGCAGTGCTCTGCGATTGCTGCCGGTCGTTGGGGTGGTGATCTCGTACCATGTGC…
Quattrini et al. 2020, Nature Ecology & Evolution	PP073672	NA	Animalia	Cnidaria	Anthozoa	Scleractinia	Poritidae	Porites	Porites cf. porites	yes	1	28	yes	0	NA	GAGAGTTAAAAAGTACGTGAAACCGTTTGAAGGGAAACGAATGGACTCAGCAATGCGCCCTTTGAGATTCAGCCGGGCGGTTGTGGCGGTGCGGGGCTTGCGGATCTGAATGGACCGCGGTCTCGGGCCCGTTGCTTCCGACCGTCGCACTTCTCTTGGACGCGAGTCAACGTCGGTTGGGACTGGGCCTCAAAGGTTCCGGGAAGGTAGGTCGGGACGCTCGCGTTCGGACTGTTACAGCCCGGTTCTCTCCCGGCTCGGGCCCGACCGAGGCGGATGCAGCACATGCCTCTTCTGGCTAGGGTCCCGTCCTTCCGGCCGGTTGTCGAATGCGGTGGACTGCTTGCAGTGCTCTGCGATTGCTGCCGGTCGTTGGGGTGGTGATCTCGTACCATGTGC…
Quattrini et al. 2020, Nature Ecology & Evolution	PP073673	NA	Animalia	Cnidaria	Anthozoa	Malacalcyonacea	Clavulariidae	Clavularia	Clavularia inflata	yes	0	NA	no	NA	NA	GAGAGTTAAAAAGTACGTGAAACCGTTGAAAGGGAAGCGAATGGGGTTAGCAATTCGTCACGTCAGATTCAGCCGTTTGCGCTCCGCGACGGGCGCGTTCTCGATCCTCGTGGACGGGACGTGTTCGGATGCGGCGTGCGTCCGGCGCACTTCTGGCTGGCGAGCGTCAGCGTCGGTCGTCGACGGGAGAGAAGGTCGCGAGGAAGGTGAGCGTTCCCTCGCGGAATGCTGTTAAGCCTCGTGCACGTACGTCTCGTCGGTGACCGTGGCGTTTCGGCGACGCGTGCCTGGCTGGCGACTCGTTTGGACGGTCCGGTCGTCGACCGTGGCGGACGGCAAGCCTGTGCGCTCGAACCGCTGCCGGTCGTTCGGACGATGTTCGCACACTACGCGTCGAGG…
Quattrini et al. 2020, Nature Ecology & Evolution	PP073674	NA	Animalia	Cnidaria	Anthozoa	Scleractinia	Poritidae	Porites	Porites lobata	yes	1	28	yes	0	NA	GAGAGTTAAAAAGTACGTGAAACCGTTTGAAGGGAAACGAATGGACTCAGCAATGCGCCCTTTGAGATTCAGCCGGGCGGTTGTGGCGGTCCGGGGCTTGCGGATCTGAATGGACCGCGGTCTCGGGCCCGTCGCTTCCGACCGTCGCACTTCTCTTGGACGCGAGTCAACGTCGGTTGGGACTGGGCCTCAAAGGTTCCGGGAAGGTAGGTCCGGACGCTCGCGTTCGGACTGTTACAGCCCGGTTCTCTCGCGGCTCGGGCCCGACCGAGGCGGATGCAGCACATGCCTCTTCTGGCTAGGGTCCCGTCCTTCCGGCCGGTTGTCGAATGCGGTGGACTGCTTGCAGTGCTCTGCGACTGCTGCCGGTCGTTGGGGTGGTGATCTCGTACCATGTGC…
Quattrini et al. 2020, Nature Ecology & Evolution	PP073675	NA	Animalia	Cnidaria	Anthozoa	Scleractinia	Caryophylliidae	Desmophyllum	Desmophyllum pertusum	yes	0	NA	yes	0	NA	GAGAGTTAAAAAGTACGTGAAACCGTTAAAAGGGAAACGAATGGACTCAGCAATGCGCCCTTTGAGATTCAGCCGGTGGGTGGGATCGGCCGGGGGTTTGCGGATCCGAACGGACCGCGGTCTCCGGCTCGTTCCTCCCCGCCGTCGCACTTCTCTTGGGCGCGCGTCAACGTCGGTTGGGACCGGGTCTTAAAGTTGCCGGGAAGGTAGGTATGGACCTCCGGGTTCGTTCTATTAGAGCCCGGCCTCTCATGGCTCGAGCCCGACCGAGGAGTCGCAGCGCATGCCTCTTGTGGCTAGGGTCCCGTCCTTCCGGCCGGTTGTCGAATGCGGTGGACTGCTTGCAGTGCTCCGCGACTGCTGCCGGTCGTTGGGGTGGTGATCTCGTACCATGCGCTT…
Quattrini et al. 2020, Nature Ecology & Evolution	PP073677	NA	Animalia	Cnidaria	Anthozoa	Scleralcyonacea	Cornulariidae	Cornularia	Cornularia pabloi	yes	0	NA	no	NA	NA	GAGAGTTAAAAAGTACGTGAAACCGTTGAAAGGGAAGCGAATGGAGTTAGCAATTCGCCTCGTCGGACTCAGCCTTTGGTCGCGGACGACGACGGGTTCTTCGATCTTCTTGGACGAAAGCCTGTCGCGCGAACGCGGCCGTCGGCGCATTTCCGACGGGCGAGCGTCAACGTCGGTTGGCTCGCGCGAGTTACAAGGACGCGGGGAAGGTAGAACCCTTTCGGGGGTTTGTTAAGCCTCGCGATCGCACGGCTCGCGGCCGACCGAGGACTGCCGCAACGCGTGCCTCCCTTCGGGGTGGGCTGGTGCCCCGTTCCGTCGGTCCGGTCGTCGACCGTGGCGGACGGCACGCCTGTGCGCTCGAACCGCTGCCGGTCGACGGGGCGGGGATCACACACC…
Quattrini et al. 2020, Nature Ecology & Evolution	PP073678	NA	Animalia	Cnidaria	Anthozoa	Scleractinia	Poritidae	Porites	Porites evermanni	yes	1	28	yes	0	NA	GAGAGTTAAAAAGTACGTGAAACCGTTTGAAGGGAAACGAATGGACTCAGCAATGCGCCCTTTGAGATTCAGCCGGGCGGTTGTGGCGGTCCGGGGCTTGCGGATCTGAATGGACCGCGGTCTCGGGCCCGTCGCTTCCGACCGTCGCACTTCTCTTGGACGCGAGTCAACGTCGGTTGGGACTGGGCCTCAAAGGTTCCGGGAAGGTAGGTCCGGACGCTCGCGTTCGGACTGTTACAGCCCGGTTCTCTCGCGGCTCGGGCCCGACCGAGGCGGATGCAGCACATGCCTCTTGTGGCTAGGGTCCCGTCCTTCCGGCCGGTTGTCGAATGCGGTGGACTGCTTGCAGTGCTCTGCGACTGCTGCCGGTCGTTGGGGTGGTGATCTCGTACCATGTGC…
Quattrini et al. 2020, Nature Ecology & Evolution	PP073679	NA	Animalia	Cnidaria	Anthozoa	Scleractinia	Poritidae	Porites	Porites lutea	yes	1	28	yes	0	NA	GAGAGTTAAAAAGTACGTGAAACCGTTTGAAGGGAAACGAATGGACTCAGCAATGCGCCCTTTGAGATTCAGCCGGGCGGTCGTGGCGGTCCGGGGCTTGCGGATCTGAATGGACCGCGGTCTCGGGCCCGTCGCTTCCGACCGTCGCACTTCTCTTGGACGCGAGTCAACGTCGGTTGGGACTGGGCCTCAAAGGTTCCGGGAAGGTAGGTCCGGACGCTCGCGTTCGGACTGTTACAGCCCGGTTCTCTCGCGGCTCGGGCCCGACCGAGGCGGATGCAGCACATGCCTCTTGTGGCTAGGGTCCCGTCCTTCCGGCCGGTTGTCGAATGCGGTGGACTGCTTGCAGTGCTCTGCGACTGCTGCCGGTCGTTGGGGTGGTGATCTCGTACCATGTGC…
Quattrini et al. 2020, Nature Ecology & Evolution	PP073680	NA	Animalia	Cnidaria	Anthozoa	Scleralcyonacea	Erythropodiidae	Erythropodium	Erythropodium caribaeorum	yes	0	NA	no	NA	NA	GAGAGTTAAAGAGTACGTGAAACCGTTGAAAGGGAAGCGAATGGAGTTAGCAATTCGCCTCGTCAGATTCAGTCGGGCGGGTGCCGCGACGCTCGTGTTCTCGATCTTCGTAGACGAGACGCGTGCGGACGCGGCGCCTGGCCGGCGCACTTCTGGCGGGCGAGCGTCAACGTCGGTCGGTCACGGGTCACAAGGTCGCGGGGAAGGTAGGTCGCCGTTAACGCGGCAACTGTTACAGCCCCGCGATCGTACGGCTCGCGAACGACCGTGGCGTCGCGACGCGTGCCTCCCCTTCGGGGGCGGGCTGGCGTCCCGTTCTGTTGGTCCGGCTGTCGACCGTGGCGGACGGCATGCCTGTGCGCTCGAACTGCTGCCGGTCAACAGGGCGGTGATCGCACA…
Quattrini et al. 2020, Nature Ecology & Evolution	PP073681	NA	Animalia	Cnidaria	Anthozoa	Scleractinia	Poritidae	Porites	Porites cf. australiensis	yes	1	28	yes	0	NA	GAGAGTTAAAAAGTACGTGAAACCGTTTGAAGGGAAACGAATGGACTCAGCAATGCGCCCTTTGAGATTCAGCCGGGCGGTTGTGGCGGTCCGGGGCTTGCGGATCTGAATGGACCGCGGTCTCGGGCCCGTCGCTTCCGACCGTCGCACTTCTCTTGGACGCGAGTCAACGTCGGTTGGGACTGGGCCTCAAAGGTCCCGGGAAGGTAGGTCCGGACGCTCGCGTTCAGACTGTTACAGCCCGGTTCTCTCGCGGCTCGGGCCCGACCGAGGCGGATGCAGCACATGCCTCTTCTGGCTAGGGTCCCGTCCTTCCGGCCGGTTGTCGAATGCGGTGGACTGCTTGCAGTGCTCTGCGACTGCTGCCGGTCGTTGGGGTGGTGATCTCGTACCATGTGC…
Quattrini et al. 2020, Nature Ecology & Evolution	PP073682	NA	Animalia	Cnidaria	Anthozoa	Malacalcyonacea	Subergorgiidae	Subergorgia	Subergorgia rubra	yes	0	NA	no	NA	NA	GAGAGTTAAAAAGTACGTGAAACCGTTGAAAGGGAAGCGAATGGAGTTAGCAATTCGCCCTGCCAGACTCAGTTGCTCGCGCGTCGCGACGCGCGCGCTCTCGATCCGCATGGACGAGACGTGTGCGGGCGCGACTCGCGGACGGCGCACTTCTGGCGGGCGAGCGTCAGCGTCGGTTGTCGACGGGCGACAAGGACGCAAGGAAGGTGAGCCGGCCCTCGCGGCCGGCTGTTAAGCCTTGCGCTCGTACAGCTCGACGGCGACCGTGGCGTTTGCGACGCGTGCCTGGCTGGCGACTCGTACGATCGGTCCGGCATGTCGACCGTGGCGGACGGCACGCCTGTGCGCTCGAACCGCTGCCGGTCGAACGTTCGATGTTCGCACACTACGCGTCTACGA…
Quattrini et al. 2020, Nature Ecology & Evolution	PP073683	NA	Animalia	Cnidaria	Anthozoa	Scleralcyonacea	Helioporidae	Heliopora	Heliopora coerulea	yes	0	NA	no	NA	NA	GAGAGTTAAAGAGTACGTGAAACCGTTGAAAGGGAAGCGAATGGAGTTAGCAATTCGCCTCGCCAGATTCAGTCTTTTGCGCTCCGTGACGTGCGCGCACTCGATCTTCGTAGACGAGTCGAGTACGGATGCGGGACGTAGGCGGCGCACTTCTGGTAGGTGAGCGTCAACGTCGGTTACCCTGCGAGCCAGAAGGCCGTGAGGAAGGTAGATCTTTCGGGATTGTTAAGCCTTGCGATCGCATGTCTCGTGGGTGACTGTGGCCTGTCGCAGCGCGTGCCTCCCTTTTGGGTGGGCTGGTGTCCTGTTTTGTTGGTCCGGTTGTCGACTGTGGCGGACGGCACGCCTGTGCGCTCGAACCGCTGCCGGTCAACAGGGCGGTGATCGCACACTACGCGC…
Quattrini et al. 2020, Nature Ecology & Evolution	PP073684	NA	Animalia	Cnidaria	Anthozoa	Scleractinia	Caryophylliidae	Paraconotrochus	Paraconotrochus antarcticus	yes	0	NA	yes	0	NA	GAGAGTTAAAAAGTACGTGAAACCGTTGAAAGGGAAACGAATGGACTCAGCAATGCGCCCTTTGAGATTCAGCCGGTCGGCGGGGTCGGTCGGGGGTTTTTGCGGATCCGAATGGACCGCGGCCTCCGACTCGAGTCATCCGGCCGTCGCACTTCTCTTGGGCGCGCGTCAACGTCGGTTGGGACTGGGTCTTAAAGGTGCCGTGAAGGTAGGTTCCCGGTCCGTGTCACAGCGGTCCGGGGTCTGTTACAGCTCGGTATTCTCATGGCTCGGGCCCGACCGAGGAGTTGCAGCGCATGCCTCATGTGGCTAGGGTCCCGTCCTTCCTTCCGGTTGTCGAATGCGGTGGACTGCTTGCAGTGTTCCGCGGTCGCTGCCGGTCGTTGGGGCGGTGTTCTC…
Quattrini et al. 2020, Nature Ecology & Evolution	PP073685	NA	Animalia	Cnidaria	Anthozoa	Scleractinia	Dendrophylliidae	Enallopsammia	Enallopsammia profunda	yes	0	NA	yes	0	NA	GAGAGTTAAAAAGTACGTGAAACCGTTGGAAGGGAAACGAATGGACTAAGCAAGGCGCCGTTTGAGATTCAGCCGGCCGGGGGCTTGCGGGTCGGGGTTTGCGGATCCGAATGGACCGCGGTCTCGCGCTCGCTTCTCCTGGCCGTCGCACTTCTCTTGGGCGCACGTCAACGTCGGTTGGGACTGGGTCTGAAAGGTTCCGGGACGGTAGGTCTGCGCGTTCCTCGCGTTCGCGTGTTCTGTTACAGCCCGGTTCTTTTTTGCGGCTCGGGCCCGACCGAGGCGGTCGCAGCGCATGCCTCTTTTGGCTAGGGTCCCGCCCGTCCGGCCGGTTGTCGACCGCGGTGGACTGCTTGCAGTGCTCCGCGACTGCTGCCGGTCGTTGGGGTGGTGATCTCG…
Quattrini et al. 2020, Nature Ecology & Evolution	PP073686	NA	Animalia	Cnidaria	Anthozoa	Scleractinia	Dendrophylliidae	Thecopsammia	cf. Thecopsammia sp.	yes	0	NA	yes	0	NA	GAGAGTTAAAAAGTACGTGAAACCGTTGGAAGGGAAACGAATGGACTCAGCAATGCGCCGTTTGAGATTCAGCCGGCCGGCGGTTTCGGCCAGAGATGTTTGCGGATCCGAATGGACCGCCGTCTCGGGCTCGATATCTGTCGGCCGTCGCACTTCTCTCGGGCGCACGTCAACGTCGGTTGGGACTGGGCCTCAAAGGTTCCGGGAAGGTAGGTCCGCGCGTTCCTCCGCGTTCGCCGCGTTCTGTTACAGCCCGGTTCTCTCTTTCGGCTCGGGCCCGACCGAGGCGGTTAGCAGCGCATGCCTCTCGTTTTGGCTAGGGTCCCGTTTCGTCCGGCCGGTTGTCGACCGCGGTGGACTGCTTGCAGTGCTCCGCGACCGCTGCCGGTCGTTTGGGCG…
Quattrini et al. 2020, Nature Ecology & Evolution	PP073687	NA	Animalia	Cnidaria	Anthozoa	Scleralcyonacea	Coralliidae	Anthomastus	Anthomastus grandiflorus	yes	0	NA	no	NA	NA	GAGAGTTAAAGAGTACGTGAAACCGTTGAAAGGGAAGCGAATGGAGTTAGCAATTCGCCCCGCCAGATTCAGCCTTCGGCGCGCCGCGCGGCGCCCGACCTCGATCTTTGTAGACGAGGCGGGCGCGAGCGCGGCGGGCCGGTGGCGCACTTCCGGCGGGCGAGCGTCAACGACGGTTGGCTGCCGGCTAGAAGGCCGCGGGGAAGGTGGATCCGTCTTCGGGCGGGTTGTTAAAGCCCTGCGATCGCATGGCCGGCGGGCGACCGTGGTAAAGCGCCGCGACGCGTGCCTCGTCTTCAGGGATTGGGGCTGGTGTCCTGTTCTGTTGGTCCGGCTGTCGACTGTGGCGGACGGCTCGCCAGTGCGCTCGAACTGCTGCCGGTCAACAGGGCGGTGAAT…
Quattrini et al. 2020, Nature Ecology & Evolution	PP073688	NA	Animalia	Cnidaria	Anthozoa	Scleralcyonacea	Keratoisididae		Keratoisidinae sp.	yes	0	NA	no	NA	NA	GAGAGTTAAAAAGTACGTGAAACCGTTGAAAGGGAAGCGAATGGAGTTAGCAATTCGCCTCGCCAGATTCAGTTTTCCGCGCCGCGCGACGCGCGCGCCCTCGATCCTTGTGGACGAGGCGCGCGCGGACGCGGGGCGTGGGGCGCGCACTTCTGGCAGGCGAGCGTCAACGTCGGTTGCCGACGAGCTAGAAGGCCGCGAGGAAGGTAGATTCCCTTTCAACGGGGGGTTGTTAAGCCTCGCGATCGCGCATCGCTCGAGGGTGACCGTGGCGAATGCCGCAACGTGGCCTCCCCGACAGGGGCGGGCTGGCGTCCTGTACTGTTGGTCCGGTTGTCGACCGTGGCGGACGGCACGCCTGTGCGCCCGAACCGCTGCCGGTCAACAGGACGGTGCACG…
Quattrini et al. 2020, Nature Ecology & Evolution	PP073689	NA	Animalia	Cnidaria	Anthozoa	Scleralcyonacea	Parasphaerascleridae	Parasphaerasclera	Parasphaerasclera valdiviae	yes	0	NA	no	NA	NA	GAGAGTTAAAGAGTACGTGAAACCGTTGAAAGGGAAGCGAATGGAGTTAGCAATTCGCCTCGCCAGATTCAGTCGGTCGCGTTCCGCGGCGCGCGTGTTCTCGATCTTCGTAGACGAGACGCGTGCGCTCGCGGTACGGGGACGGCGCACTTCTGGCGGGCGAGCGTCAACGTCGGTTGTCGGCGTGCTACAAGGCCGCGAGGAAGGTGCGCCGCCCTTCGGGGCGGTAGTTATAGCCTCGCGAGCGCATGGCATGCCGGCGACCGTGGAACGTCGCGACGCGTGCCTCCCCTCGTCGGGGGGCTGGGGCATTGTTCCGTCGATCCGGTTGTCGACTGTGGCGGACGGCACGCCTGTGCGCTCGAACCGCTGCCGGTCGCCGGGGCGATGATCACACAC…
Quattrini et al. 2020, Nature Ecology & Evolution	PP073690	NA	Animalia	Cnidaria	Anthozoa	Malacalcyonacea	Plexauridae	Plexaura	Plexaura kuna	yes	0	NA	no	NA	NA	GAGAGTTAAAAAGTACGTGAAACCGTTGAAAGGGAAGCGAATGGAGTTAGCAATTCGCCCTGCCAGATTCAGTCGCCGGCGCGGGGTGCGGGCGGCGCACTTCTGGCGAGCGAGCGTCAGCGTCGCTTGGCGTCGGGCGACAAGGACCCGAGGAAGGTGGACCGGCCCTCGCGGCCGGTTGTTAAGCCTCGGGCTCGCATGGCCCGGCCGCCGAGCGTGGCAATGGCTATCTGCGACGCGTGCCTCTGTGCTGGCGACTCGCACGATCGGTCCGGCATGTCGACCGTGGCGGACGGCACGCCTGTGCGCTCGAACTGCTGCCGGTCGATCGGACGATGTTCGCACACTACGCGTCTAGGATGCTGACGACCATACGGCTCCATCCGACCCGTCTTGAAA…
Quattrini et al. 2020, Nature Ecology & Evolution	PP073691	NA	Animalia	Cnidaria	Anthozoa	Malacalcyonacea	Sarcophytidae	Sclerophytum	Sclerophytum slieringsi	yes	0	NA	no	NA	NA	GAGAGTTAAAAAGTACGTGAAACCGTTGAAAGGGAAGCGAATGGAGTTAGCAATTCGCCCTGCCAGATTCAGTTGTTCTCACTTCGCGACGTGCACGCTCTCGATCCGCATGGACGAGACGTGCACGGACGCGACGTGTGGACGGCGCACTTCTGGCGGGCGAGCGTCAGCGTCGCTCGTCGACGGGCGACAAGGTCGCGAGGAAGGTAGACGTGCCTTCGGGCGCGTTGTTAAGACTCGCGTTCGCATGGCTCGACGACGACCGTGGCTCCTTCATGCGGAGGCGACGCGTGCCTGGCTGGCGACTCGTGCGATCGGTCCGGCATGTCGACCGTGGCGGACGGCACGCCTGTGCGCTCAAACTGCTGCCGGTCGCTCGCACGATGTTCGCACACTACG…
Quattrini et al. 2020, Nature Ecology & Evolution	PP073692	NA	Animalia	Cnidaria	Anthozoa	Malacalcyonacea	Sarcophytidae	Sclerophytum	Sclerophytum lochmodes	yes	0	NA	no	NA	NA	GAGAGTTAAAAAGTACGTGAAACCGTTGAAAGGGAAGCGAATGGAGTTAGCAATTCGCCCTGCCAGATTCAGTTGTTCGCACTTCGCGACGTGCACGCTCTCGATCCGCATGGACGAGACGTGCACGGACGCGACGTGTGGACGGCGCACTTCTGGCGGGCGAGCGTCAGCGTCGGTCGTCGACGGGCGACAAGGTCGCGAGGAAGGTAGACGTGCCTTCGGGCGCGTTGTTAAGACTCGCGTTCGCATGGCTCGACGACGACCGTGGCTCCTTCATGCGGAGGCGACGCGTGCCTGGCTGGCGACTCGTGCGATCGGTCCGGCATGTCGACCGTGGCGGACGGCACGCCTGTGCGCTCGAACTGCTGCCGGTCGCTCGCACGATGTTCGCACACTACG…
Quattrini et al. 2020, Nature Ecology & Evolution	PP073693	NA	Animalia	Cnidaria	Anthozoa	Malacalcyonacea	Sarcophytidae	Sclerophytum	Sclerophytum maximum	yes	0	NA	no	NA	NA	GAGAGTTAAAAAGTACGTGAAACCGTTGAAAGGGAAGCGAATGGAGTTAGCAATTCGCCCTGCCAGATTCAGTTGTTCGCACTTCGCGACGTGCACGCTCTCGATCCGCATGGACGAGACGTGCACGGACGCGACGTGTGGACGGCGCACTTCTGGCGGGCGAGCGTCAGCGTCGCTCGTCGACGGGCGACAAGGTCGCGAGGAAGGTAGACGTGCCTTCGGGCGCGTTGTTAAGACTCGCGTTCGCATAGCTCGACGACGACCGTGGCTCCTTCATGCGGAGGCGACGCGTGCCTGGCTGGCGACTCGTGCGATCGGTCCGGCATGTCGACCGTGGCGGACGGCACGCCTGTGCGCTCGAACTGCTGCCGGTCGCTCGCACGATGTTCGCACACTACG…
Quattrini et al. 2020, Nature Ecology & Evolution	PP073694	NA	Animalia	Cnidaria	Anthozoa	Malacalcyonacea	Tubiporidae	Tubipora	Tubipora musica	yes	0	NA	no	NA	NA	GAGAGTTAAAAAGTACGTGAAACCGTTGAAAGGGAAGCGAATGGAGTTAGCAATTCGCCCAGTCAGATTCAGTCGTTCGCGCTACGCGACGCGCGCGCTCTCGATCCGCATGGACGAGTCGAGCGCGGGCGCGCTTCGCGAACGGCGCACTTCTGGCGGGCGAGCGTCAGCGTCGGTTGTCGTCGGGCGACGAGGGCCGCGAGGAAGGTGCGCCGCCCCACGCGGGCGGCCGTTATAGCCTCGCGATCGTACGGCCCGACGACGACCGTGGCCCTTGTTTAACATGGCGACGCGTGCCCGGCTGGCGACCCGTGCGGACGGTCCGACATGTCGACCGTGGCGGACGGCACGCCTGTGCGCTCGAACCGCTGCCGGCCGTTCGAACGGTGCTCGCACACT…
Quattrini et al. 2020, Nature Ecology & Evolution	PP073695	NA	Animalia	Cnidaria	Anthozoa	Scleralcyonacea	Coralliidae	Paraminabea	Paraminabea aldersladei	yes	0	NA	no	NA	NA	GAGAGTTAAAGAGTACGTGAAACCGTTGAAAGGGAAGCGAATGGAGTTAGCAATTCGCCCCGCCAGATTCAGCCTTCGACGCGCCACGCGGCGCCCGACCTCGATCTTCGTAGACGAGGCGGGTGCGGGCGGGGCGCGCCGGTGGCGCACTTCTGGCGGGCGAGCGTCAACGAGTGTTGGCCGCCGACTAGAAGGCCGCGGGGAAGGTGGACCGGCCTTCGGGCGGGTTGTATAAAGCCCCGCGATCGCATGGCCGGCGGGCGACCGTGGCAAGCGCCGCGACGCGTGCTCCGTCCCATTCAGGGACACGGGGCTGGTGGCCCGTTCTGTTGGTCCGGCTGTCGACTGCGGCGGACGGCGCGCCAGTGCGCTCGAACTGCTGCCGGTCAACAGGGCGGT…
Quattrini et al. 2020, Nature Ecology & Evolution	PP073696	NA	Animalia	Cnidaria	Anthozoa	Malacalcyonacea	Sarcophytidae	Sarcophyton	Sarcophyton trocheliophorum	yes	0	NA	no	NA	NA	GAGAGTTAAAAAGTACGTGAAACCGTTGAAAGGGAAGCGAATGGAGTTAGCAATTCGCCCTGCCAGATTCAGTTGTTCGCGCGTCGCGACGAGCGCGCTCTCGATCCGCATGGACGAGACGCGTCCGGGCGCGACGTGCGGGCGGCGCACTTCTGGCGGGCGAGCGTCAGCGTCGGTCGCCGACGAGCGACAAGGCCGCGAGCAAGGTAGACGTGCCCGCACGGGCGCGTCGTTAAGGCTCGCGCGCGCATAGCGCGACGGCGACCGTGGCTTGCATTCTCGACGACGCGTGCCTGGCTGGCGACTCGTGCGATCGGTCCGGCATGTCGACCGCGGCGGACGGCACGCCTGTGCGCTCGAACCGCTGCCGGTCGCTTGCACGATGCTCGCACACCACGC…
Quattrini et al. 2020, Nature Ecology & Evolution	PP073697	NA	Animalia	Cnidaria	Anthozoa	Malacalcyonacea	Leptophytidae	Leptophyton	Leptophyton benayahui	yes	0	NA	no	NA	NA	GAGAGTTAAAAAGTACGTGAAACCGTTGAAAGGGAAGCGAATGGAGTTAGCAATTCGCCCTGCCAGATTCAGTCGTTCGCGCGTCGCGACGCGAGTGCTCTCGATCCGCATGGACGAGACGCGCGCGGGCACGGCGTGCGGACGCCGCACTTCTGGCGGGCGAGCGTCAGCGTCGGTTGGCGACGGGCGACAAGGACTCGAGGAAGGTGGACCGGTTTCGCGACCGGTTGTTATTAGCCTCGTGCTTCTCGCATGGCCCGACGGCGACCGTGGAAATCTCATCACGACGACGCGTGCCTGGCTGGCGACCCGAACGATCGGTCCGGCATGTCGACCGTGGCGGACGGCACGCCTGTGCGCTCGAACTGCTGTCGGTCGATCGCTTTGGTGCTCGCACAA…
Quattrini et al. 2020, Nature Ecology & Evolution	PP073698	NA	Animalia	Cnidaria	Anthozoa	Scleractinia	Caryophylliidae	Paraconotrochus	Paraconotrochus antarcticus	yes	1	27	yes	2	46, 48	GAGAGTTAAAAAGTACGTGAAACCGTCGAAAGGGAAACGAATGGAGTTAGCAATGCGCCCCTCGAGATTCAGCCGGCGGGTGGCCGGGGCGCCGGGTTTGCGGATCCGAAGGGACCGCGGCCCGGGGCGCTCGGTTCCCCGCCGTCGCACTTCTCTTGGGCGCGCGTCAGCATGGGTTGGCCGCTTCTGGGCTTGAAAGGTGCCGGCAAGGTAGGCGCGGAGGCCTTCGGGTCCTCGCGCTGTTACAGGCCGGCGCTGTCATGGCTCGGGGCCGACCGTGGAGTTCGCAGCGCATGCCTCTTGTGGCTAGGGTCCCGCCCTTCCGGCCGGCGTTCGACTGCGGTGGACTGCTTGCAGTGCTCCGCGACCGCCGCCGGTTGTTGGGGTGGTGATCTCGTA…
Quattrini et al. 2020, Nature Ecology & Evolution	PP073699	NA	Animalia	Cnidaria	Anthozoa	Malacalcyonacea	Corymbophytidae	Corymbophyton	Corymbophyton bruuni	yes	0	NA	no	NA	NA	GAGAGTTAAAAAGTACGTGAAACCGTTGAAAGGGAAGCGAATGGAGTTAGCAATTCGCCCTGCCAGATTCAGTTGTTCGCGCGTCGCGACGTGCGTGCTCTCGATCCGCATGGACGAGACGCGCGCGGGCGCGGCGTCCGGGCGGCGCACTTCTGGCGGGCGAGCGTCAGCGTCGGTTGGCGACGGGCGACAAGGACGCGAGGAAGGTGGACCGGCCCTCGCGGCCGGTTGTTAAGCCTCGCGCTCTCGCATAGCCCGACGGCGACCGTGGCATTCTCGTGCGACGCGTGCTTGGCTGGCGACTCGAACGATCGGTCCGGCATGTCGACCGTGGCGGACGGCACGCCTGTGCGCTCAAACCGCTGCCGGTTGATCGGACGATGTTCGCACAATACGCGT…
Quattrini et al. 2020, Nature Ecology & Evolution	PP073700	NA	Animalia	Cnidaria	Anthozoa	Malacalcyonacea	Carijoidae	Carijoa	Carijoa riisei	yes	0	NA	no	NA	NA	GAGAGTTAAAAAGTACGTGAAACCGTTGAAAGGGAAGCGAATGGAGTTAGCAATTCGCCCTGTCAGATTCAGTCGTTCGTGCCACGTGCGACGTGCGTGCTCTCGATCCACATGGACGAGACGTGCGCGTTTGTCGTGTGCGAGCGGCGCACTTCTGGCGGGTGAGCGTCAGCGTCGGTTGTCGACGGGTGATAAAGGCGCGAGGAAGGTAGACCGCTCTTCTCGAACGGTTGTTAAGCCTCGCGTTCGCATGGCTCGACGGTGACCGTGGCTCTCGAAGAGAGAGGCGACGCGTGCGTGGCTGGCGATTCGTCGGTCGGTCCGGCATGTCGAATGTGGCGGACGGCATGCCTGTGCGCTCGAACTGCTGCCGGTCGTTCCGACGATCTCTGCACACTA…
Quattrini et al. 2020, Nature Ecology & Evolution	PP073701	NA	Animalia	Cnidaria	Anthozoa	Malacalcyonacea	Eunicellidae	Complexum	Complexum monodi	yes	0	NA	no	NA	NA	GAGAGTTAAAAAGTACGTGAAACCGTTGAAAGGGAAGCGAATGGAGTTAGCAATTCGCCCTGCCAGATTCAGCTGCTCGCGCTTCGCGACGTGCGCGCTCTCGATCCGCATGGACGAGACGTGTGCGGGTGCGACGTGCGGACGGCGCACTTCTGGCGAGCGAGCGTCAGCGTCGGTTGCCGACGGGCGACAAGGACACGAGGAAGGTGGACCGGTCCTCGCGGCCGGTTGTTAAGCCTCGTGCTCGCATAGCTCGACGGCGACCGTGGCTCTTGCGGCGACGCGTGCCTGGCTGGCGACCCGTACGATCGGTCCGGCATGTCGACTGTGGCGGACGGCACGCCTGTGCGCTCGAACTGCTGCCGGTCGATCGGACGATGTTCGCACACTACGCGTCGA…
Quattrini et al. 2020, Nature Ecology & Evolution	PP073702	NA	Animalia	Cnidaria	Anthozoa	Malacalcyonacea	Leptophytidae	Tenerodus	Tenerodus fallax	yes	0	NA	no	NA	NA	GAGAGTTAAAAAGTACGTGAAACCGTTGAAAGGGAAGCGAATGGAGTTAGCAATTCGCCCTGCCAGATTCAGTCGTTCGCGCGCCGCGACGCGAGTGCTCTCGATCCGCATGGACGAGACGCGCGCGGACACGGCGTGCGGACGCCGCACTTCTGGCGGGCGAGCGTCAGCGTCGGTTGGCGACGGGCGACAAGGACTCGAGGAAGGTGGACCGGTTTCGCGACCGGTTGTTATTAGCCTCGTGCTTCTCGCATAGCCCGACGGCGACCGTGGAAATTCCAAGCACGACGCGTGCCTGGCTGGCGACTCTAACGATCGGTCCGGCATGTCGACCGTGGCGGACGGCACGCCTGTGCGCTCAAACTGCTGCCGGTCGATCGCTTGATGTTCGCACAATAC…
Quattrini et al. 2020, Nature Ecology & Evolution	PP073703	NA	Animalia	Cnidaria	Anthozoa	Malacalcyonacea	Nephtheidae	Dendronephthya	Dendronephthya sinaiensis	yes	0	NA	no	NA	NA	GAGAGTTAAAAAGTACGTGAAACCGTTGAAAGGGAAGCGAATGGAGTTAGCAATTCGCCCCGCCAGATTCAGTCGCTCGCGCATCGCGACGGTCGCGCTCTCGATCCGCATGGACGAGGCGCGCTCGGACGCGGTGCGCGGACGGCGCACTTCTGGCGAGCGAGCGTCAGCGTCGGTTGTCGACGGGCGATAAGGTCGCAAGGAAGGTGGACCGGCCTCGCGGCTGGTTGTTAAGACTTGCGCTCGCATAGCTCGTCGGCGACCGTGGTCTGCGGCGCGTGCTCGGCTGGCGACCCGACCGATCGGTCCGGCATGTCGACCGTGGCGGACGGCACGCCTGTGCGCTCGAACCGCTGCCTGTCGATCGTGACGGTGTTCGCACACTACGCGCCTAGGATG…
Quattrini et al. 2020, Nature Ecology & Evolution	PP073704	NA	Animalia	Cnidaria	Anthozoa	Scleralcyonacea	Ifalukellidae	Trichogorgia	Trichogorgia capensis	yes	0	NA	no	NA	NA	GAGAGTTAAAAAGTACGTGAAACCGTTGAAAGGGAAGCGAATGGAGTTAGCAATTCGCCGTGCCAGATTCAGTTCGCGCGCGCGGAGCGGCTCGCTCGTCCTCGATCTTTGTAGACGAGGCGGTCGAGCACGTGCTGCGTGCCGGGCGCACTTCTGGCCGGCGAGCGTCAACGTCGGTTGGTCGCGAGCGAAAAGGTCGTGAGGAAGGTAAGCGACTTCGAGTCGCCGTTAAGCCTCGCGAACGTACGGCTCGCGGGCGACCGAGGCCTCGTGCCGCGGCGCGTGCCTTCCCTCTCGGGGGAAGGCTGGTGTCCTGTTCTGTCGGTCCGGTTGTCGACCGTGGCGGACGGCACGCCTGTGCGCTCGAACCGCTGCCGGTCGACAGGGCGGTGTACACAC…
Quattrini et al. 2020, Nature Ecology & Evolution	PP073705	NA	Animalia	Cnidaria	Anthozoa	Scleralcyonacea	Primnoidae	Primnoella	Primnoella chilensis	yes	0	NA	no	NA	NA	GAGAGTTAAAAAGTACGTGAAACCGTTGAAAGGGAAGCGAATGGAGTTAGCAATTCGCCTTGCCAGATTCAGTTTTGCTCGTTCCGCGACGCGCGCGCACTCGATCCACACGGACGAGTCGCGTGCGGACGCGGGACGTGCAGGGCGCACTTCTGGCAGGCGAGCGTCAACGTCGGTTGGCTGCGAGTTACTAAGGACGCGAGGAAGGTAGATTGCTCTTCGGGGTGATTGTTAAGCCTCGCGATCGTATGGCTCGCGGGCGACCGTGGTTCACGCCGCAACGCGCGCCTCCCTTCGGGGTGGGCTGGTGTCTTGTTCTGTTGGTCCGGTTGTCGACTGTGGCGGACGGCACGCCTGTGCGCTCGAACCGCTGCCGGTCAACAGGGCGATGTACATACA…
Quattrini et al. 2020, Nature Ecology & Evolution	PP073706	NA	Animalia	Cnidaria	Anthozoa	Malacalcyonacea	Incrustatidae	Incrustatus	Incrustatus comauensis	yes	0	NA	no	NA	NA	GAGAGTTAAAAAGTACGTGAAACCGTTGAAAGGGAAGCGAATGGAGTTAGCAATTCGCCCTGTCAGACTCAGCCGTTCGTGGTTCGCGACGTGCGCGCTCTCGATCCGCATGGACGAGACGTGTACGGGTGTGGGCTTCGAGCGGCGCACTTCTGGCGGGCGAGCGTCAGCGTCGGTTGTCGACGGGCGATAAGGACACGAGGAAGGTGGACTCGTCTTCGGAGGGGTTGTTACAGCCTTGTGCTCGCATAGCTCGACGGCGACCGTGGCTCTTTGAGGCGACGCGTGCCTGGCTGGCGACTCTCGTTATCGGTCCGGCATGTCGACTGTGGCGGACGGCACGCCTGTGCGCTCGAACTGCTGCCGGTCGATAAGGGGATGTTCGCTCACGACGCGTCG…
Quattrini et al. 2020, Nature Ecology & Evolution	PP073707	NA	Animalia	Cnidaria	Anthozoa	Malacalcyonacea	Paramuriceidae	Paramuricea	Paramuricea sp.	yes	0	NA	no	NA	NA	GAGAGTTAAAAAGTACGTGAAACCGTTGAAAGGGAAGCGAATGGAGTTAGCAATTCGCCCCGCCAGATTCAGTTGCTCGCACGTCGCGACGTGCGCGCTCTCGATCCGCATGGACGAGACGTGTGCGGGTGCGACGTGCGGTCTGCGCACTTCTGGCGAGCGAGCGTCAGCGTCGGTTGTCGACGGGCGACAAGGACGCGGGGAAGGTGGGCTGGCCTTCACGGCCGGTTGTTACAGCCCCGTGCTCGCATAGCTCGACGGCGACCGTGGCTCGGCGACGCGTGCCTGGCTGGTGACTCGAACGATCGGTCCGGCATGTCGACCGTGGCGGACGGCACGCCTGTGCGCTCAAACCGCTGCCGGTCGATCGGACGGTGTTCACACACTACGCGTCAAAGA…
Quattrini et al. 2020, Nature Ecology & Evolution	PP073708	NA	Animalia	Cnidaria	Anthozoa	Scleralcyonacea	Briareidae	Briareum	Briareum hamrum	yes	0	NA	no	NA	NA	GAGAGTTAAAAAGTACGTGAAACCGTTGAAAGGGAAGCGAATGGAGTTAGCAATTCGCCTCGTCAGATTCAGTCGAACGCTCGTCGCGACGCACGCGCTCTCGATCTTCGTAGACGGGACGCGTGCGGACGCGACGCTCGTTCGGCGCACTTCTGGCGGGCGAGCGTCGGCGTCGGTTGCCGGCGGGCTAGAAGGACGCGGGGAAGGTAGGACGTCGTTCGCGGCGTTCACTATAGCCCCGCGATCGCACGGCCCGCTCGGCGACCGTGGCCATCGCTGTCGCGACGCGTGCCTTCGGGCTGGCGACCCGTTCGGACGATCCGGTTGTCGACTGTGGCGGACGGCACGCCTGTGCGCTCGAACTGCTGCCGGCCGACCGGGCGGTGTTCGCACACCACG…
Quattrini et al. 2020, Nature Ecology & Evolution	PP073709	NA	Animalia	Cnidaria	Anthozoa	Malacalcyonacea	Paramuriceidae	Acanthogorgia	Acanthogorgia breviflora	yes	0	NA	no	NA	NA	GAGAGTTAAAAAGTACGTGAAACCGTTGAAAGGGAAGCGAATGGAGTTAGCAATTCGCCCTGCCAGATTCAGTTGCTCGCGCGTCGCGACGTGCGCGCTCTCGATCCGCATGGACGAGACGTGCGCGGGTGCGACGTGCGGTCTGCGCACTTCTGGCGAGCGAGCGTCAGCGTCGGTTGTCGACGGGCGACAAGGACGCGGGGAAGGTGCGCCGGCCCTCGTGGCCGGCTGTTATAGCCCCGCGAACGCATGGCTCGACGGCGACCGTGGCTCGGCGACGCGTGCCTGGCTGGCGACTCGAACGATCGGTCCGGCATGTCGACCGTGGCGGACGGCACGCCTGTGCGCTCGAACTGCTGCCGGCCGATCGGACGATGTTCGCACACTACGCGTCGAGGA…
Quattrini et al. 2020, Nature Ecology & Evolution	PP073710	NA	Animalia	Cnidaria	Anthozoa	Malacalcyonacea	Siphonogorgiidae	Siphonogorgia	Siphonogorgia godeffroyi	yes	0	NA	no	NA	NA	GAGAGTTAAAAAGTACGTGAAACCGTTGAAAGGGAAGCGAATGGAGTTAGCAATTCGCCTAGCCAGACTCAGTTGCCCGCGCTTCGCGACGTGCGCGCTCTCGATTCACATGAACGAGACGTGCACGGGTGCGATGTGCGAGCGGCGCACTTCTGGCGGGCGAGCGTCAGCGTCGGTTGTCGACGGGCGATAAGGACGCGAGGAAGGTGAACTTGCTGTTCGCGCAGCGGGTTGTTAAGCCTCGCGATTCGCATAGCTCGACGGCGACCGTGGCTCGTGGAGTCGACGCGTGCCTGGCTGGCCACACGTGCGATCGGTCCGGCATGTCGAACGCGGCGGACGGCACGCCTGTGCGCCCAAACTGCGGCCGGTCGCTCGCGCGATGTGTGCTCACTACGC…
Quattrini et al. 2020, Nature Ecology & Evolution	PP073711	NA	Animalia	Cnidaria	Anthozoa	Malacalcyonacea	Paramuriceidae	Bebryce	Bebryce sp.	yes	0	NA	no	NA	NA	GAGAGTTAAAAAGTACGTGAAACCGTTGAAAGGGAAGCGAATGGAGTTAGCAATTCGCCCTGCCAGATTCAGTTGCTCGTGCTTCGCGACGCACGCGCTCTCGATCCGCATGGACGAGGCGTGTGCGGGTGCGATGTGCGGTCGGCGCACTTCTGGCGAGCGAGCGTCAGCGTCGGTTGTCGACGGGCGACAAGGACACGGGGAAGGTAGACCGGCCTTTACGGCCGGTTGTTAAGCCTCGTGCTCGCATAGCTCGACGGCGACCGTGGCTCGGCGACGCGTGCCTGGCTGGCGACTCGAACGATCGGTCCGGCATGTCGACCGTGGCGGACGGCACGCCTGTGCGCTCAAACTGCTGCCGGTCGATCGGACGATGTTCGCACACTACGCGTCGAAGAT…
Quattrini et al. 2020, Nature Ecology & Evolution	PP073712	NA	Animalia	Cnidaria	Anthozoa	Malacalcyonacea	Capnellidae	Eunephthya	Eunephthya thyrsoidea	yes	0	NA	no	NA	NA	GAGAGTTAAAAAGTACGTGAAACCGTTGAAAGGGAAGCGAATGGAGTTAGCAATTCGCCCTGCCAGATTCAGCCGCTCGCGCTTCGCGACGTGCACGCTCTCGATCCGCATGGACGAGACGTGTGCGGGTGCGTGGTGCGGACGGCGCACTTCTGGCGAGCGAGCGTCAGCGTCGGTTGTCGGCGGGCGACAAGGGCACAAGGAAGGTAGACTGGCCTAACGGCTGGTTGTTAAGACTTGTGATCGTATAGCCCGACGGCGACCGTGGCCCTGCGACGTGTGCTTGGCTGGCGACCCGACCGATCGGTCCGGCATGTCGACCGTGGCGGACGGCACGCCTGTGCGCTCAAACTGCTGCCGGTCGATCGACGGCGTTCGCACACTACGCGTCTAGGATGC…
Quattrini et al. 2020, Nature Ecology & Evolution	PP073713	NA	Animalia	Cnidaria	Anthozoa	Scleralcyonacea	Spongiodermidae	Diodogorgia	Diodogorgia nodulifera	yes	0	NA	no	NA	NA	GAGAGTTAAAGAGTACGTGAAACCGTTGAAAGGGAAGCGAATGGAGTTAGCAATTCGCCTCGCCAGATTCAGTCTTCCGGTCGCCGCGACGCGCGTGCCCTCGATCTTTGTAGACGGGACGAGTGCGGACGCGGCGCCTGGGCGGCGCACTTCTGGCCGGCGAGCGTCGCCGTCAGTTGCCGGCGGGCTAAAAGGCCGCGAGGAAGGTAGGACGTCGCTCGCGCCGTCTGCTACAGCCTCGCGATCGCATCGCTCGCCCGGCGACCGTGGCCAACGTGTCGCGACGCGTGCCTTCCCCTCGGGGAGGGCTGGTGACCCGTTCGGTCGATCCGGTTGTCGACCGTGGCGGACGGCACGCCTGTGCGCTCGAACCGCTGCCGGCCGATCGGGCGGTGTTCA…
Quattrini et al. 2020, Nature Ecology & Evolution	PP073714	NA	Animalia	Cnidaria	Anthozoa	Scleralcyonacea	Balticinidae	Balticina	Balticina finmarchica	yes	0	NA	no	NA	NA	GAGAGTTAAAGAGTACGTGAAACCGTTGAAAGGGAAGCGAATGGAGTTAGCAATTCGCCTCGCCAGATTCAGTTTTTCGCGTCCCGCGACGTGCGCGATCTCGATCTTTGTAGACGAGTCGAGTACGGACGCGGGACGGGGGAGGCGCACTTCTGGCGGGTGAGCGTCAACGTCGGTCTCGGGCGAGCTACAAGGTCGCGAGGAAGGTGGACTTTCCCTCGGGAAGGTTGTTATTAGCCTCGCGAACGAATGACTCGTCCGAGGCCGTGGCAAGTCGTCGCGACGCGTGCCTACCCCTTTGGGGGTGGGCTGGTGTCCTGTACTGTTGGTCCGGTTGTCAACCGCGGCGGACGGCACGCCTGTGCGCTCGAACCGCTGCCGGTCAACAGTTCGGTGATC…
Quattrini et al. 2020, Nature Ecology & Evolution	PP073715	NA	Animalia	Cnidaria	Anthozoa	Scleralcyonacea	Kophobelemnidae	Kophobelemnon	Kophobelemnon sp.	yes	0	NA	no	NA	NA	GAGAGTTAAAGAGTACGTGAAACCGTTGAAAGGGAAGCGAATGGAGTTAGCAATTCGCCTCGCCAGATTCAGTTTTTCGCGTTCCGCGACGTTCGCGATCTCGATCTTTGTAGACGAGTCGTGTACGGACGCGGAACGGGGGAGGCGCACTTCTGGCGGGCGAGCGTCAACGTCGGTCTCGAGCGAGCTACAAGGCCGCGAGGAAGGTAGACTGTCCTTCGGGGTGGTTGTTAAGCCTCGCGAACGAATGGCTCGCCCGAAGCCGTGGCAAGTCGTCGCGACGCGTGCCTCCTCCCTTCGGGGTGGTGGGCTGGTGTCCTGTCCTGTTTGTCCGGTTGTCGACCGTGGCGGACGGCACGCCTGTGCGCTCGAACCGCTGCCGGTCAACAGTTCGGTGAT…
Quattrini et al. 2020, Nature Ecology & Evolution	PP073716	NA	Animalia	Cnidaria	Anthozoa	Malacalcyonacea	Alcyoniidae	Anthothela	Anthothela grandiflora	yes	0	NA	no	NA	NA	GAGAGTTAAAAAGTACGTGAAACCGTTGAAAGGGAAGCGAATGGAGTTAGCAATTCGCCCTGCCAGATTCAGTTGTTCGTGCTCCGCGACGTGCGCGCTCTCGATCCGCATGGACGAGACGTGTACGGGTGCGGCGCTCGGACGGCGCACTTCTGGCGGGCGAGCGTCAGCGTCGGTTGTCGACGGGCGATAAGGACACAAGGAAGGTGGGCTGGCCTTCGGGCTGGCTGTTATAGCCTTGCACTCGTATAGCTCGACGGCGACCGTGGCTCATCGAGGCGACGCGTGCCTAGCTGGCGACTCTGACGATCGGTCTGGCATGTCGACTGTGGCGGACGGCACGCCTGTGCGCTCGAACTGCTGCCGGTCGATCGTCTGATGTTCGCACACTACGCGTCG…
Quattrini et al. 2020, Nature Ecology & Evolution	PP073717	NA	Animalia	Cnidaria	Anthozoa	Scleralcyonacea	Ideogorgiidae	Ideogorgia	Ideogorgia capensis	yes	0	NA	no	NA	NA	GAGAGTTAAAAAGTACGTGAAACCGTTGAAAGGGAAGCGAATGGAGTTAGCAATTCGCCTCGCCAGATTCAGCATCTCGTGCACCGCGACGTGCTCGATCTCGATCTTTGTAGACGGGACGCGTACGACCGCGGCGTACGAGCTGCGCACTTCTGACGGGCGAGCGTCGACGTCGGTTCCGGGCGGGCTACAAGGCCGCGAGGAAGGTAGGTTGTCGTTCGCGGCGACTGTTAAGCCTCGCGATCGCATGGCTCGTGCCGGGACCGTGGCCACGCGTCGCGATGCGTGCCTCCCCTCGGGGAGGCTGGTGACCTGTTCCGTCGATCCGGCTGTCGACTGTGGCGGACGGCACGCCTGTGCGCTCGAACCGCTGCCGGTCGACAGGGCGGTGTTCACACA…
Quattrini et al. 2020, Nature Ecology & Evolution	PP073718	NA	Animalia	Cnidaria	Anthozoa	Malacalcyonacea	Melithaeidae	Alertigorgia	Alertigorgia orientalis	yes	0	NA	no	NA	NA	GAGAGTTAAAAAGTACGTGAAACCGTTGAAAGGGAAGCGAATGGAGTTAGCAATTCGCCCTGTCAGACTCAGTTGCTCGTGCGTCGCGACGTGTGCGCTCTCGATCCCTATAGACGAGACGTAGGCGGACGCGACGTGCGGACAGCGCACTTCTGGCGAGCGAGCGTCAGCGTCGGTTGTCGACGGGTGATAAGGTCGCGAGGAAGGTGCGCCGCTCTCACGAGCGGTTGTTATAGCCTCGCGTTCGCATAGCTCGACGGCGACCGTGGCTCTTAATTGGCGACGCGTGCCTGGCTGGCGACTTGTACGATCGGTCCGGCATGTCGACCGTGGCGGACGGCACGCCTGTGCGCTCAAACTGCTGCCGGTCGATTGTACGATGTTCGCACACTACGCGTC…
Quattrini et al. 2020, Nature Ecology & Evolution	PP073719	NA	Animalia	Cnidaria	Anthozoa	Scleralcyonacea	Echinoptilidae	Actinoptilum	Actinoptilum molle	yes	0	NA	no	NA	NA	GAGAGTTAAAGAGTACGTGAAACCGTTGAAAGGGAAGCGAATGGAGTTAGCAATTCGCCACGCCAGATTCAGTTTTCTCGCGTGCCGCGACGCGCGCGCACTCGATCTCTGTAGACGAGTCGCGTTCGGACGGGGCGCGTGCGAGGCGCACTTCTGGCGGGCGAGCGTCAACGTCGGTCTCGGACGGGCTACAAGGTGGCGAGGAAGGTGGACCGCGCCTTCGGGCGCGGTTGTTAAGCCTCGCACACGAACGGCTCGTGCGAGACCGAGGCATCTCGCGACGCGTGCCTGCCCCCGTCAAGGGGGCGGGCTGGCGACCCTAACTCGTTTGTCCGGTTGTCGAGGGTGGCGGACGGCACGCCTGTGCGCTCGAACTGCTGCCGGTCAACGAGTCGGTGT…
Quattrini et al. 2020, Nature Ecology & Evolution	PP073720	NA	Animalia	Cnidaria	Anthozoa	Malacalcyonacea	Sinulariidae	Sinularia	Sinularia brassica	yes	0	NA	no	NA	NA	GAGAGTTAAAAAGTACGTGAAACCGTTGAAAGGGAAGCGAATGGAGTTAGCAATTCGCCCTGCCAGATTCAGTTGCTCGCGCATCGCGACGTGCGCGCTCTCGATCCGCATGGACGAGACGTGTGTGGATGCGACGTGCGGACGGCGCACTTCTGGCGAGCGAGCGTCAGCGTCGGTTGCCGACGGGCGACAAGGTCACAAGGAAGGTGGACTGGCCAATATGGCTGGTTGTTAAGCCTTGTGCTCGCATAGCTCGACGGCGACCGTGGCTCGGAGAGGCGACGCGTGCCTGGCTGGCGACTCGAACGATCGGTCCGGCATGTCGACCGTGGCGGACGGCACGCCTGTGCGCTCGAACTGCTGCCGGTCGATCGGACGATGTTCGCACACTACGCGTCG…
Quattrini et al. 2020, Nature Ecology & Evolution	PP073721	NA	Animalia	Cnidaria	Anthozoa	Malacalcyonacea	Subergorgiidae	Annella	Annella mollis	yes	0	NA	no	NA	NA	GAGAGTTAAAAAGTACGTGAAACCGTTGAAAGGGAAGCGAATGGAGTTAGCAATTCGCCCTGTCAGATTCAGCCGCTCGTTCTTCGCGACGTGCGCGCTCTCGATCCGCATGGACGAGTCGCGTACGGGCGCGAGGTGCGGACGGCGCACTTCTGGCGAGCGAGCGTCAGCGTCGGTTGTCGACGAGTGACAAGGACGCGAGGAAGGTAGACTGGCCCTCGCGGTCGGTTGTTAAGCCTCGCGCTCGTATAGCTCGACGGCGACCGTGGCGTTGCGACGCGTGCCTGGCTGGCGACCCGAACGTTCGGTCCGGCATGTCGACCGTGGCGGACGGCACGCCTGTGCGCTCAAACTGCTGCCGGTCGATCGGACGGTGTTCGCACACTACGCGTCGAGGAT…
Quattrini et al. 2020, Nature Ecology & Evolution	PP073722	NA	Animalia	Cnidaria	Anthozoa	Malacalcyonacea	Sarcophytidae	Sclerophytum	Sclerophytum flexibile	yes	0	NA	no	NA	NA	GAGAGTTAAAAAGTACGTGAAACCGTTGAAAGGGAAGCGAATGGAGTTAGCAATTCGCCCTGCCAGATTCAGTTGTTCGCGCTTCGCGACGTGCACGCTCTCGATCCGCATGGACGTGACGTGCACGGGTGCGACGTGCGGACGGCGCACTTCTGGCGGGCGAGCGTCAGCGTCGGTCGTCGACGGGCGATAAGGTCGCGAGGAAGGTAGACGTGCCTTCGGGCGCGTTGTTAAGACTCGCGTTCGCATAGCTCGACGGCGACCGTGGCTCCTTAACACGGAGGCGACGCGTGCCTGGCTGGCGACCCGTGCGATCGGTCCGGCATGTCGACCGTGGCGGACGGCACGCCTGTGCGCTCGAACTGCTGCCGGCCGCTCGCACGGTGCTCGCACACTACG…
Quattrini et al. 2020, Nature Ecology & Evolution	PP073723	NA	Animalia	Cnidaria	Anthozoa	Malacalcyonacea	Melithaeidae	Solenocaulon	Solenocaulon sp.	yes	0	NA	no	NA	NA	GAGAGTTAAAAAGTACGTGAAACCGTTGAAAGGGAAGCGAATGGAGTTAGCAATTCGCCTTGTCAGACTCAGCTGCTCGTGCATCGCGACGCGTGCGTTCTCGATCCCTATAGACGAGACGTGTGCGGGCGCGGCGTGCGGACGGCGCACTTCTGGCGGGCGAGCGTCAGCGTCGGTTGTCGACGGGTGAAAAGGTCGCGAGGAAGGTGGACTGGCCTCACGGCTGGTTGTTATAGCCTCGCGTTCGTATAGCCCGACGGCGACCGTGGCTCTTTGAGGCGACGCGTGCCTGGCTGGCGACTCGTACGATCGGTCCGGCATGTCGACCGTGGCGGACGGCACGCCTGTGCGCTCAAACTGCTGCCGGTCGATTGGACGATGTTCGCACACTACGCGTCG…
Quattrini et al. 2020, Nature Ecology & Evolution	PP073724	NA	Animalia	Cnidaria	Anthozoa	Malacalcyonacea	Cladiellidae	Cladiella	Cladiella pachyclados	yes	0	NA	no	NA	NA	GAGAGTTAAAAAGTACGTGAAACCGTTGAAAGGGAAGCGAATGGAGTTAGCAATTCGCCACGCCAGATTCAGCTGTTCGTGCGGTGCGACGTGCGCGCTCTCGATCCGCATGGACGAGACGCTTGCGGGTGCGCCGTGCGAGCCGCGCACTTCTGGCTGGCGAGCGTCAGCGTCGGTTGGCGTCGGGCGACAAGGATGCGAGGAAGGTGAGCCGGTACTCGCTGCCGGCTGTTAAGCCTCGCGATCGCACGGCCCGACGCCGACCGTGGGACTGCGACGCGTGCCGCCTCTTTACAGGGGTGGCTGGAGACCCGTACCGATCGGTCCGGCATGTCGACCGTTGGCGGACGGCACGCCTGTGCGCTCGAACCGCTGCCGGCCGATCGAACGGTGCTCGCA…
Quattrini et al. 2020, Nature Ecology & Evolution	PP073725	NA	Animalia	Cnidaria	Anthozoa	Malacalcyonacea	Melithaeidae	Melithaea	Melithaea erythraea	yes	0	NA	no	NA	NA	GAGAGTTAAAAAGTACGTGAAACCGTTGAAAGGGAAGCGAATGGAGTTAGCAATTCGCCCTGTCAGACTCAGCCGGTCGCGAGTAGCGACGCGCGCGTTCTCGATCCATATAGACGAGACGCGTGCGGGTGCGACTTGCGGTCGGCGCACTTCTGGCGGGCGAGCGTCAGCGTCGGTTGTCGACGGGCGAGAAGGTCGCGAGAAAGGTGGACCGGTCTCCTCACGACCGGTTGTTAAGCCTCGCGCTCGTACGGCCCGACGACGACCGTGGCTCGTGGAGGCGACGCGTGCCTGGCTGGCGACTCACCCGATCGGTCCGGCATGTCGACCGTGGCGGACGGCACGCCTGTGCGCTCGAACCGCTGCCGGTCGATCGGATGATGTTCGCACACTACGCGT…
Quattrini et al. 2020, Nature Ecology & Evolution	PP073726	NA	Animalia	Cnidaria	Anthozoa	Malacalcyonacea	Acrossotidae	Acrossota	Acrossota amboinensis	yes	1	27	no	NA	NA	GAGAGTTAAAAAGTACGTGAAACCGTCGAAAGGGAAGCGAATGGAGTTAGCAATTCGCCCTGTCAGATTCAGCCGCTCGTGCTTCGCGACGTGCGCGCTCTCGATCCGCATGGACGAGACGTGCACGGGCGCGACGTGCGGACGGCGCACTTCTGGCGGGTGAGCGTCAGCGTCGGTTGCCGCCGGGCGACAAGGTCGCGGGAAAGGTGAGCCGGTCCTCGGACCTGCCGTTACAGTCCCGCGTTCGCATGGCCCGGAGGCGACCGTGGCTCTCGGAGGCGACGCGTGCTCGGCTGGCGACTCGATCGATCGGTCCGACATGTCGACCGTGGCGGACGGCACGCCTGTGCGCTCGAACTGCTGTCGTCCGATCGAGCGGTGTTCGCACACAACGCGTCG…
Quattrini et al. 2020, Nature Ecology & Evolution	PP073727	NA	Animalia	Cnidaria	Anthozoa	Scleralcyonacea	Dendrobrachiidae	Dendrobrachia	Dendrobrachia sarmentosa	yes	0	NA	no	NA	NA	GAGAGTTAAAAAGTACGTGAAACCGTTGAAAGGGAAGCGAATGGAGTTAGCAATTCACCTTATCAGATTCAGTCTTTCGCATTGCGCGACGTGTGCGTCTTCGATCTTCGTAGACGAGGCGTGCATGGACGGGCAACGTGGACGGCGCACTTCTGGTGGGTGAGCGTCAACGTCAGTTACCCACGAGTTACAAGGCCGCCAGGAAGGTAGATCTTCACCGAGGATTGTTAAGCCTGGCGAGCGCATGACTTGAGGGTGACTGAGGAGTGCCGCAACGCGTGCCTCCCTTCGGGGTGGGCTGGTGTCCTGTTTTGTTGGTCCGGTTGTCGACTGTGGCGGACGGCACGCCTGTGCGCTCGAACTGCTGCCGGCCAACAGGGCGGTGATCACACACCACGT…
Quattrini et al. 2020, Nature Ecology & Evolution	PP073728	NA	Animalia	Cnidaria	Anthozoa	Malacalcyonacea	Paramuriceidae	Neoacis	Neoacis? sp.	yes	0	NA	no	NA	NA	GAGAGTTAAAAAGTACGTGAAACCGTTGAAAGGGAAGCGAATGGAGTTAGCAATTCGCCCTGCCAGATTCAGTTGCTCGTGCTTCGCGACGCACGCGCTCTCGATCCGCATGGACGAGACGTGTGCGGGTGCGTTGTGCGGTCGGCGCACTTCTGGCGAGCGAGCGTCAGCGTCGGTTGCCGACGGGCGACAAGGACACGAGGAAGGTGGACCGGCGTCTACCGCCGGTTGTTAAGCCTTGTGCTCGCATAGCTCGACGGCGACCGTGGCTCGGCGACGCGTGCCTGGCTGGCGACTCGAACGATCGGTCCGGCATGTCGACCGTGGCGGACGGCACGCCTGTGCGCTCAAACTGCTGCCGGTCGATCGGACGATGTTCGCACACTACGCGTCGAAGAT…
Quattrini et al. 2020, Nature Ecology & Evolution	PP073729	NA	Animalia	Cnidaria	Anthozoa	Malacalcyonacea	Anthogorgiidae	Muricella	Muricella sp.	yes	0	NA	no	NA	NA	GAGAGTTAAAAAGTACGTGAAACCGTTGAAAGGGAAGCGAATGGAGTTAGCAATTCGCCCTGCCAGATTCAGTTGCTCGTGCTTCGCGACGTGCGCGCTCTCGATCCGCATGGACGAGACGTGTGCGGGTGCGATGTGCGGTCGGCGCACTTCTGGCGAGCGAGCGTCAGCGTCGGTTGTCGACGGGCGACAAGGACACGAGGAAGGTGGACCGGTCTTCATGGCCGGTTGTTAAGCCTCGTGCTCGCATAGCTCGACGGCGACCGTGGCCTGCGACGCGTGCCTGGCTGGCGACACGTGCGATCGGTCCGGCATGTCGACCGTGGCGGACGGCACGCCTGTGCGCTCAAACTGCTGCCGGTCGATCGTTCGTTGTTCGCACACTACGCGTCAAAGATG…
Quattrini et al. 2020, Nature Ecology & Evolution	PP073730	NA	Animalia	Cnidaria	Anthozoa	Scleralcyonacea	Protoptilidae	Distichoptilum	Distichoptilum gracile	yes	0	NA	no	NA	NA	GAGAGTTAAAGAGTACGTGAAACCGTTGAAAGGGAAGCGAATGGAGTTAGCAATTCGCCTCGCCAGATTCAGTTTTTCGCCTCCCGAGACGCGCGTCATCTCGATCTCTGTAGACGAGTGGCGTGCGGACGCGGGACGTGAGAGGCGCACTTCTGGCGGGCGAGCGTCAACGTCGGTCTTCGACGAGCTATAAGGTCGAGAGGAAGGTAGACTGGCCTTCGGGTCGGTTGTTAAGCCTCTCGAACGCACGGCTCGTCGGAGACCGTGGCAACTTAGTCGCGACGCGTGCCTCCCTTCGGGGTGGGCTGGTGTCCCGTTTTGCTTGTGCGGTTGTCGACCGTGGCGGACGGCACGCCTGTGCGCTCGAACCGCTGCCGTACAACATTTCGGTGACACACA…
Quattrini et al. 2020, Nature Ecology & Evolution	PP073731	NA	Animalia	Cnidaria	Anthozoa	Malacalcyonacea	Aquaumbridae	Aquaumbra	Aquaumbra klapferi	yes	0	NA	no	NA	NA	GAGAGTTAAAAAGTACGTGAAACCGTTGAAAGGGAAGCGAATGGAGTTAGCAATTCGCCCTGCCAGATTCAGTTGCTCGGGCTTCGCGACGTGCACGCTCTCGATCCGCATGGACGAGACGTGTGTGGGCGCGATGTACGGACAGCGCACTTCTGGCGAGCGAGCGTCAGCGTCGGTTGTCGACGAGTGATAAGGACACAAGGAAGGTAGATTGGCCTCACGGCTGGTTGTTAAGCCTTGTGCTCGTATAACTTGATGGCGACCGTGGCTCGAAGAGGCGACGCGTGCCTGGCTGGTGACTCGTACGATCGGTCCGGCATGTCGACTGTGGCGGACGGCACGCCTGTGCGCTCGAACTGCTGCCGGTCGATCGGACGATGTTCGCACACTACGCGTCGA…
Quattrini et al. 2020, Nature Ecology & Evolution	PP073732	NA	Animalia	Cnidaria	Anthozoa	Malacalcyonacea	Paramuriceidae	Thrombophyton	Thrombophyton coronatum	yes	0	NA	no	NA	NA	GAGAGTTAAAAAGTACGTGAAACCGTTGAAAGGGAAGCGAATGGAGTTAGCAATTCGCCCTGCCAGATTCAGTTGCTCGTGCTTCGCGACGCACGCGCTCTCGATCCGCATGGACGAGACGTGTGCGGGTGCGATGTGCGGTCGGCGCACTTCTGGCGAGCGAGCGTCAGCGTCGGTTGTCGACGGGCGACAAGGACACGAGGAAGGTGGGCCGGCCTTTACGGCTGGTCGTTAAGCCTTGTGCTCGGATAGCTCGACGGCGACCGTGGCTCGGCGACGCGTGCCTGGCTGGTGACTCGAACGATCGGTCCGGCATGTCGACCGTGGCGGACGGCACGCCTGTGCGCTCAAACTGCTGCCGGTCGATCGGACGATGTTCACACACGACGCGTCGAAGAT…
Quattrini et al. 2020, Nature Ecology & Evolution	PP073733	NA	Animalia	Cnidaria	Anthozoa	Scleralcyonacea	Chelidonisididae	Chelidonisis	Chelidonisis aurantiaca mexicana	yes	0	NA	no	NA	NA	GAGAGTTAAAGAGTACGTGAAACCGTTGAAAGGGAAGCGAATGGAACTTAAAATTCGCTTTGCCAGATTCAGTCCCTTGCGTCCTCCAACGTGAGTGTTCTCGATCTTTTTAGACGGGACGCGTACGGACGGCGGAGCGTGGGCGGTGCATTTCTGGTAGGCGAGCGTCAACATCACTTGGCCGCGAGTTAGAAAGCTGCGAGGAAGGTAGGTCCTTCGGGATCGTTAAGCCTTGCCAGCAAATAACTCGAGGCCGACTGTGGCTTGTCGCAACGCGTGCCTCCCCTCGGGGCAGGCTGGTGTCTTGTTTTGTTGGTATGGTCGGCGATGGCGACGGACGACGGTTGCCTGTGCGTCCGAACTGCGGCCTGTCGACAGGATGGTGAACATACACCACGC…
Quattrini et al. 2020, Nature Ecology & Evolution	PP073734	NA	Animalia	Cnidaria	Anthozoa	Scleralcyonacea	Coralliidae		Anthomastinae n. sp.	yes	0	NA	no	NA	NA	GAGAGTTAAAGAGTACGTGAAACCGTTGAAAGGGAAGCGAATGGAGTTAGCAATTCGCCACGCCAGATTCAGCCTTTGGCGCGCCACGCGGCACCCGAACTCGATCTTTGTAGACGAGGCGGGCGCGGGCGTGGCGCGCCGGTGGCGCACTTCCGGCGGGCGAGCGTCAACGACGGTTGGCTGCCGGCTAGAAGGCCGCGGGGAAGGTGGATCCGTCTTCGGGCGGATTGTTAAAGCCCTGCGATCGCATGGCCGGCGGGCGACCGTGGGTAAAGCGCCGCGACGCGTGCCTCTCGTCTTCAGGGATATGGGGCTGGTGTCCTGTTTTGTTGGTCCGGCTGTCGACTGTGGCGGACGGCTCGCCAGTGCGCCCGAACTGCTGCCGGTCAACAGGGCGGT…
Quattrini et al. 2020, Nature Ecology & Evolution	PP073735	NA	Animalia	Cnidaria	Anthozoa	Scleractinia	Caryophylliidae	Desmophyllum	Desmophyllum dianthus	yes	0	NA	yes	0	NA	GAGAGTTAAAAAGTACGTGAAACCGTTAAAAGGGAAACGAATGGACTCAGCAATGCGCCCTTTGAGATTCAGCCGGTGGGTGGGATCGGCCGGGGGTTTGCGGATCCGAACGGACCGCGGTCTCCGGCTCGTTCCTCCCCGCCGTCGCACTTCTCTTGGGCGCGCGTCAACGTCGGTTGGGACCGGGTCTTAAAGTTGCCGGGAAGGTAGGTATGGACCTTCGGGTTCGTTCTATTAGAGCCCGGCCTCTCATGGCTCGAGCCCGACCGAGGAGTCGCAGCGCATGCCTCTTGTGGCTAGGGTCCCGTCCTTCCGGCCGGTTGTCGAATGCGGTGGACTGCTTGCAGTGCTCCGCGACTGCTGCCGGTCGTTGGGGTGGTGATCTCGTACCATGCGCTT…
Quattrini et al. 2020, Nature Ecology & Evolution	PP073736	NA	Animalia	Cnidaria	Anthozoa	Scleractinia	Flabellidae	Flabellum	Flabellum alabastrum	yes	0	NA	yes	0	NA	GAGAGTTAAAAAGTACGTGAAACCGTTGAAAGGGAAACGAATGGACTCAGCAATGCGCCCATCTTGGAGATTCAGCCGGGCGGCGGGGTCGGCGGGGGATTGGCGGATCCGAACGGACCGCGGTCTCCCGCTCCTCCTCGTCGACCGTCGCACTTCTCTTGGGCGCGCGTCAACGTCGGTCGGCGCTGGGTCTGAAGGGTTCCGGGAAGGTGAGTCCGCGGCGACACTCGCTGTCGTCGCGTTCCGTTATAGCCCGGTTCTCGGATCGACTCGGAGCCGACCGAGGCGGTCGCAGCGCATGCCTCTCGTGGCTAGGGTCCCGTCGTCCTCCGGCCGGTCGTCGACCGCGGTGGACTGCTTGCAGTGCTCCGCGACAGCTGCCGGTCGTTGGGGCGGTGA…
Quattrini et al. 2020, Nature Ecology & Evolution	PP073737	NA	Animalia	Cnidaria	Anthozoa	Malacalcyonacea	Nephthyigorgiidae	Nephthyigorgia	Nephthyigorgia sp.	yes	0	NA	no	NA	NA	GAGAGTTAAAAAGTACGTGAAACCGTTGAAAGGGAAGCGAATGGAGTTAGCAATTCGCCCTGCCAGATTCAGTTGCTCGTGCTTCGCGACGTGCGCGCTCTCGATCCGCATGGACGAGACGTGTGCGGATGCGATGTGCGGTCGGCGCACTTCTGGCGAGCGAGCGTCAGCGTCGGTTGCCGACGGGCGACAAGGACACAGGGAAGGTGGACTGGCCTTACGGCCGGTTGTTAAGCCTTGTGCTCGCATAGCTCGACGGCGACCGTGGCTCCAAGAGGCGACGCGTGCTTGGCTGGCGACTCTAACGTTCGGTCCGGCATGTCAACTGTGGCGGACGGCACGCCTGTGCGCTCGAACTGCTGCCGGTCGAACGCAATGATGTTCGCACACTACGCGTCG…
This study	PP410616	Skim	Animalia	Cnidaria	Anthozoa	Malacalcyonacea	Alcyoniidae	Lateothela	Lateothela cf. grandiflora	yes	0	NA	no	NA	NA	GAGAGTTAAAAAGTACGTGAAACCGTTGAAAGGGAAGCGAATGGAGTTAGCAATTCGCCCTGCCAGATTCAGTTGCTCGTGCGCCGCGACGTGCGCGCTCTCGATCCGCATGGACGAGGCGTGCGCGGGTGCGGCGCTCGGACGGCGCACTTCTGGCGGGCGAGCGTCAGCGTCGGTTGTCGACGGGCGATAAGGACGCGAGGAAGGTGGAGCGGCCCTCGGGCCGCTTGTTAAGCCTTGCGCACGTATAGCTCGACGGCGACCGTGGCTCCGAAGGAGGCGACGCGTGCCTCTAGCTGGTGACTCGAACGATCGGTCTGGCATGTCGACCGTGGCGGACGGCACGCCTGTGCGCTCGAACTGCTGCCGGTCGATCGTGCGATGTTCGCACACTACGCG…
This study	PP410619	Skim	Animalia	Cnidaria	Anthozoa	Malacalcyonacea			ARMS Octocoral recruit	yes	0	NA	no	NA	NA	GAGAGTTAAAAAGTACGTGAAACCGTTGAAAGGGAAGCGAATGGAGTTAGCAATTCGCCCTGCCAGATTCAGCCGCTCGTGCACCGCGACGTGCGCGCTCTCGATCCGCATGGACGAGACGTGCGCGGGTGCGGCGTGCGGACGGCGCACTTCTGGCGGGCGAGCGTCAGCGTCGGTTGTCGACGGGCGAAAAGGTCGCGGGGAAGGTGGACTGCCCTTCGGGACGGTTGTTAAGCCTCGCGCTCGTACGGCTCGACGGCGACCGTGGCTCCTCGGGAGGCGACGTGTGCCTAGCTGGCGACTCGTATCGATCGGTCTGGCATGTCGACTGTGGCGGACGGCACGCCTGTGCGCTCAAACTGCTGCCGGTCGATCGTGCGGTGTTCGCACATTACGCGT…
This study	PP410621	Skim	Animalia	Cnidaria	Anthozoa	Malacalcyonacea	Gorgoniidae	Callistephanus	cf. Callistephanus sp.	yes	0	NA	no	NA	NA	GAGAGTTAAAAAGTACGTGAAACCGTTGAAAGGGAAGCGAATGGAGTTAGCAATTCGCCCTGCCAGATTCAGTTGTYCGTKCTTCGCGACGTGCGCGCTCTCGATCCGCATGGACGAGACGTGTRCGGATGCGATGCGYGGGCGGCGCACTTCTGGCGAGCGAGCGTCAGCGTCGGTTGTCGACGGGCGACAAGGACATGAGGAAGGTGAACYGACCTTTACGGCCGGTTGTTAAGCCTCTTGCTCKCATAGCCCGACGGCGACCGTGGBNTCTGCGACGCGTGCCTSGCTGGTGACTCTTACGATCGGTCCGGCATGTCGACCGTGGCGGACGGCACGCCTGTGCGCTCAAACTGCTGCCGGTCGATCGAATGATGCTCACACACTACGCGTCGAAGA…
This study	PP410641	Skim	Animalia	Cnidaria	Anthozoa	Malacalcyonacea	Malacalcyonacea_incertae_sedis	Thesea	Thesea cf. rubra	yes	0	NA	yes	2	37, 46	GAGAGTTAAAAAGTACGTGAAACCGTTGAAAGGGAAGCGAATGGAGTYAGCAATTCGCCCTGCCAGATTCAGTTGTTCGTGCTTCGCGACGTGCGCGCTCTCGATCCGCATGGACGAGACGTGTACGGATGCGWTGCGSGGGCGGCGCACTTCTGGCGAGCGAGCGTCAGCGTCGGTTGTCGACGGGCGACAAAGACAYGAGGAAGGTGAAYCGGCCTTTNACGGCCGGTTGTTAAGCCTCKTGTTCGCATAGCCCGACGGCGACCGTGGCTCTGCGACGCGTGCCTGGCTGGTGACTCGTACGATCGGTCYGGCATGTCGACCGTGGCGGACGGCACGCCTGTGCGCTCRAACTGCTGCCGGTCGATCGAATGAYGKWCACACACTACGCGTCGAGGA…
This study	PP410642	Skim	Animalia	Cnidaria	Anthozoa	Malacalcyonacea	Malacalcyonacea_incertae_sedis	Thesea	Thesea cf. rubra	yes	0	NA	yes	2	37, 46	GAGAGTTAAAAAGTACGTGAAACCGTTGAAAGGGAAGCGAATGGAGTYAGCAATTCGCCCTGCCAGATTCAGTTGTTCGTGCTTCGCGACGTGCGCGCTCTCGATCCGCATGGACGAGACGTGTACGGATGCGWTGCGSGGGCGGCGCACTTCTGGCGAGCGAGCGTCAGCGTCGGTTGTCGACGGGCGACAAAGACAYGAGGAAGGTGAAYCGGCCTTTNACGGCCGGTTGTTAAGCCTCKTGTTCGCATAGCCCGACGGCGACCGTGGCTCTGCGACGCGTGCCTGGCTGGTGACTCGTACGATCGGTCYGGCATGTCGACCGTGGCGGACGGCACGCCTGTGCGCTCRAACTGCTGCCGGTCGATCGAATGAYGKWCACACACTACGCGTCGAGGA…
This study	PP410643	Skim	Animalia	Cnidaria	Anthozoa	Malacalcyonacea	Gorgoniidae	Leptogorgia	Leptogorgia cf. violacea	yes	0	NA	no	NA	NA	GAGAGTTAAAAAGTACGTGAAACCGTTGAAAGGGAAGCGAATGGAGTTAGCAATTCGCCCTGCTAGATTCAGTTGTTCGTGCTTCGCGACGTGCGCGCTCTCGATCCGCATGGACGAGGCGCGCACGGATGCGATGTGCGGACAGCGCACTTCTGGCGAGCGAGCGTCAGCGTCGGTTGTCGATGGGCGACAAGGACATGAGGAAGGTGAACTGGTCCTTGTGACCGGTTGTTATAGCCTCTTGTTCGCATAGCCCGACGGCGACCGTGGCTCTGCGACGCGTGCCTGGCTGGTGATTCTTACGATCGGTCCGGCATGTCGACCGTGGCGGACGGCACGCCTGTGCGCTCAAACTGCTGCCGGTCGATCGTACGTTTTTCACACACTACGCGTCTAGGA…
This study	PP410645	Skim	Animalia	Cnidaria	Anthozoa	Malacalcyonacea	Malacalcyonacea_incertae_sedis	Thesea	Thesea nivea	yes	0	NA	no	NA	NA	GAGAGTTAAAAAGTACGTGAAACCGTTGAAAGGGAAGCGAATGGAGTTAGCAATTCGCCCTGCCAGATTCAGTTGCTCGTGCTTCGCGACGCGCTCGCTCTCGATCCGCATGGACGAGACGTGTGCGGGTGCGATGTGCGGTCGGCGCACTTCTGGCGAGCGAGCGTCAGCGTCGGTTGTCGACGGGCGACAAGGACACGAGGAAGGTGAGCCGGCCTTACCGCCGGTTGTTAAGCCTCGTGCTCGCATAGCTCGACGGCGACCGTGGCTCTGCGACGCGTGCCTGGCTGGTGACTCGAACGATCGGTCCGGCATGTCGACCGTGGCGGACGGCACGCCTGTGCGCTCAAACTGCTGCCGGTCGATCGGACGATGTTCGCACACTACGCGTCGAAGATG…
This study	PP410646	Skim	Animalia	Cnidaria	Anthozoa	Malacalcyonacea	Paramuriceidae		Paramuriceidae sp.	yes	0	NA	no	NA	NA	GAGAGTTAAAAAGTACGTGAAACCGTTGAAAGGGAAGCGAATGGAGTTAGCAATTCGCCCTGCCAGATTCAGTTGCTCGTGCTTCGCGACGCACGCGCTCTCGATCCGCATGGACGAGGCGTGTGCGGGTGCGATGTGCGGACGGCGCACTTCTGGCGAGCGAGCGTCAGCGTCGGTTGTCGACGGGCGACAAGGACACGAGGAAGGTAAACCGGCCTTTACAGCCGGTTGTTAAGCCTTGTGCTCGCATAGCTCGACGGCGACCGTGGCTCGGCGACGCGTGCCTGGCTGGCGACTCGAACGATCGGTCCGGCATGTCGAACGTGGCGGACGGCACGCCTGTGCGCTCAAACTGCTGCCGGTCGATCGGACGATGTTCGCACACTACGCGTCGAAGAT…
This study	PP410647	Skim	Animalia	Cnidaria	Anthozoa	Malacalcyonacea	Paramuriceidae	Bebryce	Bebryce cf. cinerea/grandis	yes	0	NA	no	NA	NA	GAGAGTTAAAAAGTACGTGAAACCGTTGAAAGGGAAGCGAATGGAGTTAGCAATTCGCCCTGCCAGATTCAGTTGCTCGTGCTTCGCGACGCACGCGCTCTCGATCCGCATGGACGAGACGTGTGCGGGTGCGATGTGCGGTCGGCGCACTTCTGGCGAGCGAGCGTCAGCGTCGGTTGTCGACGGGCGACAAGGACACGAGGAAGGTGGGCCGGCCTTTACCGCCGGTTGTTAAGCCTCGTGCTCGCATAGCTCGACGGCGACCGTGGCTCGGCGACGCGTGCCTGGCTGGCGACTCGAACGATCGGTCCGGCATGTCGACCGTGGCGGACGGCACGCCTGTGCGCTCAAACTGCTGCCGGTCGATCGGACGATGTTCGCACACTACGCGTCGAAGAT…
This study	PP410650	Skim	Animalia	Cnidaria	Anthozoa	Malacalcyonacea	Paramuriceidae		Paramuriceidae sp.	yes	0	NA	no	NA	NA	GAGAGTTAAAAAGTACGTGAAACCGTTGAAAGGGAAGCGAATGGAGTTAGCAATTCGCCCCGCCAGATTCAGTTGCTCGCACGTCGCGACGTGCGCGCTCTCGATCCGCATGGACGAGACGTGTGCGGGTGCGACGTGCGGTCTGCGCACTTCTGGCGAGCGAGCGTCAGCGTCGGTTGTCGACGGGCGACAAGGACGCGGGGAAGGTGGGCTGGCCTTCACGGCCGGTTGTTACAGCCCCGTGCTCGCATAGCTCGACGGCGACCGTGGCTCGGCGACGCGTGCCTGGCTGGTGACTCGAACGATCGGTCCGGCATGTCGACCGTGGCGGACGGCACGCCTGTGCGCTCAAACCGCTGCCGGTCGATCGGACGGTGTTCACACACTACGCGTCAAAGA…
This study	PP410651	Skim	Animalia	Cnidaria	Anthozoa	Malacalcyonacea	Paramuriceidae	Paramuricea	Paramuricea sp. (A/E)	yes	0	NA	no	NA	NA	GAGAGTTAAAAAGTACGTGAAACCGTTGAAAGGGAAGCGAATGGAGTTAGCAATTCGCCCCGCCAGATTCAGTTGCTCGCACGTCGCGACGTACGCGCTCTCGATCCGCATGGACGAGACGTGTGCGGGTGCGACGTGCGGTCTGCGCACTTCTGGCGAGCGAGCGTCAGCGTCGGTTGTCGACGGGCGACAAGGACGCGGGGAAGGTGGGCTGGCCTTCACGGCCGGTTGTTACAGCCCCGTGCTCGCATAGCTCGACGGCGACCGTGGCTCGGCGACGCGTGCCTGGCTGGTGACTCGAACGATCGGTCCGGCATGTCGACCGTGGCGGACGGCACGCCTGTGCGCTCAAACCGCTGCCGGTCGATCGGACGGTGTTCACACACTACGCGTCAAAGA…
This study	PP410653	Skim	Animalia	Cnidaria	Anthozoa	Malacalcyonacea	Paramuriceidae		Paramuriceidae sp.	yes	0	NA	no	NA	NA	GAGAGTTAAAAAGTACGTGAAACCGTTGAAAGGGAAGCGAATGGAGTTAGCAATTCGCCCCGCCAGATTCAGTTGCTCGCACGTCGCGACGTACGCGCCCTCGATCCGCATGGACGAGGCGTGTGCGGGTGCGACGTGCGGTCTGCGCACTTCTGGCGAGCGAGCGTCAGCGTCGGTTGTCGACGGGCGACAAGGACGCGGGGAAGGTGGACTGGCCTTCGCGGCCGGTTGTTACAGCCCCGTGCTCGCATAGCTCGACGGCGACCGTGGCTCGGCGACGCGTGCCTGGCTGGTGACTCGAACGATCGGTCCGGCATGTCGACCGTGGCGGACGGCACGCCTGTGCGCTCAAACCGCTGCCGGTCGATCGGACGATGTTCACACACTACGCGTCAATGA…
This study	PP410654	Skim	Animalia	Cnidaria	Anthozoa	Malacalcyonacea	Paramuriceidae		Paramuriceidae sp.	yes	0	NA	no	NA	NA	GAGAGTTAAAGAGTACGTGAAACCGTTGAAAGGGAAGCGAATGGAGTTAGCAATTCGCCCCGCCAGATTCAGTTGCTCGCACGTCGCGACGTACGCGCCCTCGATCCGCATGGACGAGGCGTRTGCGGGTGCGACGTGCGGTCTGCGCACTTCTGGCGAGCGAGCGTCAGCGTCGGTTGTCGACGGGCGACAAGGACRCGGGGAAGGTGGACTGGCCTTCGCGGCCGGTTGTTACAGCCCCGTGCTCGCATAGCTCGACGGCGACCGTGGCTCGGCGACGCGTGCCTGGCTGGTGACTCGAACGATCGGTCCGGCATGTCGACCGTGGCGGACGGCACGCCTGTGCGCTCAAACCGCTGCCGGCCGATCGGACGATGTTCACACACTACGCGTCAATGA…
This study	PP410655	Skim	Animalia	Cnidaria	Anthozoa	Malacalcyonacea	Paramuriceidae	Placogorgia	Placogorgia cf. rudis/tenuis	yes	0	NA	no	NA	NA	GAGAGTTAAAAAGTACGTGAAACCGTTGAAAGGGAAGCGAATGGAGTTAGCAATTCGCCCCGCCAGATTCAGTTGCTCGCACGTCGCGACGTACGCGCTCTCGATCCGCATGGACGAGGCGTGTGCGGGTGCGACGTGCGGTCTGCGCACTTCTGGCGAGCGAGCGTCAGCGTCGGTTGTCGACGGGCGACAAGGACAGGGGGAAGGTGGACTGGCCTTCACGGCCGGTTGTTACAGCCCCGTGCTCGCATAGCTCGACGGCGACCGTGGCTCGGCGACGCGTGCCTGGCTGGTGACTCGAACGATCGGTCCGGCATGTCGACCGTGGCGGACGGCACGCCTGTGCGCTCAAACCGCTGCCGGCCGATCGGACGATGTTCACACACTACGCGTCAATGA…
This study	PP410656	Skim	Animalia	Cnidaria	Anthozoa	Malacalcyonacea	Scleracidae	Scleracis	Scleracis cf. guadalupensis	yes	0	NA	no	NA	NA	GAGAGTTAAAAAGTACGTGAAACCGTTGAAAGGGAAGCGAATGGAGTTAGCAATTCGCCCTGCCAGATTCAGTTGATCGTGCCTCGCGACGTGCGCGCTCTCGATCCGCATGGACGAGACGTGTGCGGGTGCGATGCTCGGTCGGCGCACTTCTGGCGAGCGAGCGTCAGCGTCGGTTGTCGACGGGCGACAAGGACACGAGGAAGGTGGACCGGTCYTCGCGGCCGGTTGTTAAGCCTCGTGCTCGCATAGCTCGACGGCGACCGTGGCTCTGCGACGCGTGCCTGGCTGGCGACTCGTACGATCGGTTCGGCATGTCGACCGTGGCGGACGGCACGCCTGTGCGCTCAAACTGCTGCCGGTCGATCGTTCGATGTTCGCACACTACGCGTCGAAGAT…
This study	PP410657	Skim	Animalia	Cnidaria	Anthozoa	Malacalcyonacea			ARMS Octocoral recruit	yes	0	NA	no	NA	NA	GAGAGTTAAAAAGTACGTGAAACCGTTGAAAGGGAAGCGAATGGAGTTAGCAATTCGCCCTGCCAGATTCAGTTGATCGTGCCTCGCGACGTGCGCGCTCTCGATCCGCATGGACGAGACGTGTGCGGGTGCGATGCTCGGTCGGCGCACTTCTGGCGAGCGAGCGTCAGCGTCGGTTGTCGACGGGCGACAAGGACACGAGGAAGGTGGACCGGTCCTCGCGGCCGGTTGTTAAGCCTCGTGCTCGCATAGCTCGACGGCGACCGTGGCTCTGCGACGCGTGCCTGGCTGGCGACTCGTACGATCGGTTCGGCATGTCGACCGTGGCGGACGGCACGCCTGTGCGCTCAAACTGCTGCCGGTCGATCGTTCGATGTTCGCACACTACGCGTCGAAGAT…
This study	PP410660	Skim	Animalia	Cnidaria	Anthozoa	Malacalcyonacea	Victorgorgiidae	Trachythela	Trachythela sp.	yes	0	NA	no	NA	NA	GAGAGTTAAAAAGTACGTGAAACCGTTGAAAGGGAAGCGAATGGAGTTAGCAATTCGCCCTGCCAGATTCAGTTGCTCGCGCTTCGCGACGTGCGCGCTCTCGATCCGCAYGGACGAGACGTGTGCGGGTGCGATGTGTGGACGGCGCACTTCTGGCGAGCGAGCGTCAGCGTCGGTTGTCGGCGGGCGACAAGGATGCAAGGAAGGTGGACTGGTCTTTATGACCGGTTGTTAAGCCTTGTGCTCGTATAGCTCGACGGCGACCGTGGCTCTGCGACGCGTGCCTGGCTGGTGACCCGAACGTTCGGTCCGGCATGTCGACSGTAGCGGACGGCACGCCTGTGCGCTCAAACTGCTGCCGGCCGATCGGATGGTGTTCGCACACTACGCGTCTAAGAT…
This study	PP410674	Skim	Animalia	Cnidaria	Anthozoa	Malacalcyonacea			Malacalcyonacea sp.	yes	0	NA	no	NA	NA	GAGAGTTAAAAAGTACGTGAAACCGTTGAAAGGGAAGCGAATGGAGTTAGCAATTCGCCTGCCTGATTCAGTTGGTCGTGCTTCGCGACGTGCGCGCTCTCGATCCGCATGGACGAGGCGTGTACGGGTGCGACGTGCGGTCGGCGCACTTCTGGCAGGCGAGCGTCAGCGTCGGTTGTCGACGGGCGAAAAGGACACAAGGAAGGTGAACCGTCCCTCGTGGAAGGTTGTTAAGCCTTGTGCTCGCATAGCTCGACGGCGACCGTGGCCGGGCGACGCGTGCCTGGCTGGCGACTTGTACGATCTGTTTGGCATGTCGACCGTGGCGGACGGCACGCCTGTGCGCTCAAACTGCTGCCGGCGGATCGTACGATGTTCGCACACTACGCGTCGAAGATG…
This study	PP410675	Skim	Animalia	Cnidaria	Anthozoa	Malacalcyonacea	Malacalcyonacea_incertae_sedis	Caliacis	cf. Caliacis nutans	yes	0	NA	no	NA	NA	GAGAGTTAAAAAGTACGTGAAACCGTTGAAAGGGAAGCGAATGGAGTTAGCAATTCGCCTGCCTGATTCAGTTGGTCGTGCTTCGCGACGTGCGCGCTCTCGATCCGCATGGACGAGGCGTGTACGGGTGCGATGTGCGGTCGGCGCACTTCTGGCAGGCGAGCGTCAGCGTCGGTTGTCGACGGGCGAMAAGGACACAAGGAAGGTGAACCGTCCCTCGTGGAAGGTTGTTAAGCCTTGTGCTCGCATAGCTCGACGGCGACCGTGGCCGGGCGACGCGTGCCTGGCTGGCGACTTGTACGATCTGTTYGGCATGTCGACCGTGGCGGACGGCACGCCTGTGCGCTCAAACTGCTGCCGGCGGATCGTACGATGTTCGCACACWACGCGTCGAAGATG…
This study	PP410683	Skim	Animalia	Cnidaria	Anthozoa	Malacalcyonacea	Nidaliidae	Nidalia	Nidalia sp.	yes	0	NA	no	NA	NA	GAGAGTTAAAAAGTACGTGAAACCGTTGAAAGGGAAGCGAATGGAGTTAGCAATTCGCTYTGCCAGACTCAGTTGCCCGCGCTTCGCGACGCGCRCGTTCTCGATCCCCAATTTGGACGAGACGTGCGCGGGTGCGATGTGCGGACGGCGCACTTCTGGCGAGCGAGCGTCAGCGTCGGTTGTCGACGGGCGATAAGGTCGCAAGGAAGGTGAACCGTTCTTCGCGAACGGTTGTTAAGCCTTGCGCTCGCATRGCTCGACSGCGACCGTGGCTCCTTCTTTTTAAGAAAGGCGACGCGTGCCTTTGTGCTGGCGACTCACGCGTTCGGTCCGGCATGTCGACCGTGGCGGACGGCACGCCTGTGCGCTCGAACTGCTGCCGGTCGATCGTGAGATGTT…
This study	PP410708	Skim	Animalia	Cnidaria	Anthozoa	Malacalcyonacea	Siphonogorgiidae	Chironephthya	Chironephthya sp.	yes	0	NA	no	NA	NA	GAGAGTTAAAAAGTACGTGAAACCGTTGAAAGGGAAGCGAATGGAGTTAGCAATTCGCCCAGCCAGACTCAGTTGCCCGTGCTTCGCGACGTGCGCGCTCTCGATTCACATGAACGAGACGTGCACGGGTGCGATGTGCGAGCGGCGCACTTCTGGCGGGCGAGCGTCAGCGTCGGTTGTCGACGGGCGATAAGGACGCGAGGAAGGTGAACTTGCTGTTCGCGCAGTGGGTTGTTAAGCCTCGCGGTTCGCATAGCTCGACGGCGACCGTGGCTCGTGGAGTCGACGCGTGCTTGGCTGGCCACTCGTGCGATCGGTCCGGCATGTCGAACGTGGCGGACGGCACGCCTGTGCGCCCAAACTGCGGCCGGTCGCTCGCACGATGTGTGCTCACAACGC…
This study	PP410709	Skim	Animalia	Cnidaria	Anthozoa	Malacalcyonacea	Siphonogorgiidae	Chironephthya	Chironephthya sp.	yes	0	NA	no	NA	NA	GAGAGTTAAAAAGTACGTGAAACCGTTGAAAGGGAAGCGAATGGAGTTAGCAATTCGCCCAGCCAGACTCAGTTGCCCGTGCTTCGCGACGTGCGCGCTCTCGATTCACATGAACGAGACGTGCACGGGTGCGATGTGCGAGCGGCGCACTTCTGGCGGGCGAGCGTCAGCGTCGGTTGTCGACGGGCGATAAGGACGCGAGGAAGGTGAACTTGCTGTTCGCGCAGTGGGTTGTTAAGCCTCGCGGTTCGCATAGCTCGACGGCGACCGTGGCTCGTGGAGTCGACGCGTGCTTGGCTGGCCACTCGTGCGATCGGTCCGGCATGTCGAACGTGGCGGACGGCACGCCTGTGCGCCCAAACTGCGGCCGGTCGCTCGCACGATGTGTGCTCACAACGC…
This study	PP410715	Skim	Animalia	Cnidaria	Anthozoa	Malacalcyonacea	Plexauridae	Swiftia	Swiftia exserta	yes	0	NA	no	NA	NA	GAGAGTTAAAAAGTACGTGAAACCGTTGAAAGGGAAGCGAATGGAGTTAGCAATTTGCCCAKRSTCAGATTCAGCCGKTCGTTCCTCGCCACGTTCGCGTTCCCGATCCCCGTTGTGGACGGGACGTGCACGGATGCGAYGTGCGGCCGGCGCACTTCTGGCGGGCAAGCGTYAGCRTCGGTTGCCGACGGGTGTGAAGGACTCGAGGAAGGTGGGCCGGTCGTCATGGTCGGTTGTTAAGCCTCGARCTCGCACGACCCGTTKCCGACCGTGGCCNNRTATCAGGTTGCGACGCGTGCYTGSCTGGCRACTCGTACGATCGATCCGGCATGTCGACCGTGGCGGACGGCACGCCTGTGCGCTCGAACTGCTGCCGGTCGATCGGACGATGTTCGCACA…
This study	PP410716	Skim	Animalia	Cnidaria	Anthozoa	Malacalcyonacea	Plexauridae	Swiftia	Swiftia exserta	yes	0	NA	no	NA	NA	GAGAGTTAAAAAGTACGTGAAACCGTTGAAAGGGAAGCGAATGGAGTTAGCAATTTGCCCAGRGTCAGATTCAGCCGKTCGTTCMTCGCCACGTTCGCGTTCCCGATCCCCGTTGTGGACGGGACGTGCACGGATGCGATGTGCGGCCGGCGCACTTCTGGCGGGCAAGCGTCAGCRTCGGTTSCCGACGGGTGTGAAGGACTCGAGGAAGGTGGGCCGGYCGTCAYGGTCGGTTGTTAAGCCTCGAGCTCGCACGACCCGTYKCCGACCGTGGCCRTATNNCAGGTTGCRACGCGTGCNNNNCTGGCTGGCRACTCGTACGATCGATCCGGCATGTCGACCGTGGCGGACGGCACGCCTGTGCGCTCGAACTGCTGCCGGTCGATCGGACGATGTTCG…
This study	PP410717	Skim	Animalia	Cnidaria	Anthozoa	Malacalcyonacea	Plexauridae	Swiftia	Swiftia exserta	yes	0	NA	no	NA	NA	GAGAGTTAAAAAGTACGTGAAACCGTTGAAAGGGAAGCGAATGGAGTTAGCAATTTGCCCAGRSTCAGATTCAGCCGKTCGTTCCTCGCCACGTTCGCGTTCCCGATCCCCGTTGTSGACGGGACGTGCACGGATGCGATGTGCGGCCGGCGCACTTCTGGCGGGCAAGCGTYAGCRTCGGTTSCCGACGGGTGTGAAGGACTCGAGGAAGGTGGGCCGGYCGTCAYGGTCGGTTGTTAAGCCTCGAGCTCGCACGACCCGTTKCCGACCGTGGCCNNRTATCAGGTTGCGACGCGTGCNNNNYTGSCTGGCRACTCGTACGATCGATCCGGCATGTCGACCGTGGCGGACGGCACGCCTGTGCGCTCGAACTGCTGCCGGTCGATCGGACGATGTTCG…
This study	PP410718	Skim	Animalia	Cnidaria	Anthozoa	Malacalcyonacea	Plexauridae	Swiftia	Swiftia exserta	yes	0	NA	no	NA	NA	GAGAGTTAAAAAGTACGTGAAACCGTTGAAAGGGAAGCGAATGGAGTTAGCAATTTGCCCAGRSTCAGATTCAGCCGKTCGTTCCTCGCCACGTTCGCGTTCCCGATCCCCGTTGTGGACGGGACGTGCACGGATGCGATGTGCGGCCGGCGCACTTCTGGCGGGCAAGCGTCAGCRTCGGTTGCCGACGGGTGTGAAGGACTCGAGGAAGGTGGGCCGGYCGTCAYGGTCGGTTGTTAAGCCTCGAGCTCGCACGACCCGTTKCCGACCGTGGCCRTATCAGGTTGCGACGCGTGCCTGGCTGGCRACTCGTACGATCGATCCGGCATGTCGACCGTGGCGGACGGCACGCCTGTGCGCTCGAACTGCTGCCGGTCGATCGGACGATGTTCGCACACT…
This study	PP410719	Skim	Animalia	Cnidaria	Anthozoa	Malacalcyonacea	Plexauridae	Swiftia	Swiftia exserta	yes	0	NA	no	NA	NA	GAGAGTTAAAAAGTACGTGAAACCGTTGAAAGGGAAGCGAATGGAGTTAGCAATTTGCCCAKRSTCAGATTCAGCCGKTCGTTCCTCGCCACGTTCGCGTTCCCGATCCCCGTTGTGGACGGGACGTGCACGGATGCGAYGTGCGGCCGGCGCACTTCTGGCGGGCAAGCGTYAGCRTCGGTTSCCGACGGGTGTGAAGGACTCGAGGAAGGTGGGCCGGYCGTCAYGGTCGGTTGTTAAGCCTCGAGCTCGCACGACCCGTTKCCGACCGTGGCYNNRTATCAGGTTGCGACGCGTGCNNNNYTGSCTGGCRACTCGTACGATCGRTCCGGCATGTCGACCGTGGCGGACGGCACGCCTGTGCGCTCGAACTGCTGCCGGTCGATCGGACGATGTTCG…
This study	PP410723	Skim	Animalia	Cnidaria	Anthozoa	Malacalcyonacea	Plexauridae	Muricea	Muricea pendula	yes	0	NA	no	NA	NA	GAGAGTTAAAAAGTACGTGAAACCGTTGAAAGGGAAGCGAATGGAGTTAGCAATTYGCCCTGYCRGATTCAGYYGYTCGYKCKCSGCGACGYKMKYGCYCTCGATCCAAGCGGACGGGACGTGAACGGATACGGCGAGCGATCGGCGCACTTTCGGCGGACAAGCGTCAGCATCGCTCGGCCGTGGGCGAAAAGCACKCGAGGAAGGTGAACCGCGTCTGGTTGTTAAGCCTCGTGAACGCCTGGCCCATTGCCGACCGTTTCCTCTGCGACGTGTGCCTGCCTGGCAGCTCGAACTGTCGGCYCGGCRTGTCGACYGTGGCGGACGGCACGCCTGTGCGCWCGAACTGCYGCCGRTCGAYMGKHYGATGYTCGCACAYKACGCGTCRAWRAYGCYGAC…
This study	PP410724	Skim	Animalia	Cnidaria	Anthozoa	Malacalcyonacea	Plexauridae	Muricea	Muricea pendula	yes	0	NA	no	NA	NA	GAGAGTTAAAAAGTACGTGAAACCGTTGAAAGGGAAGCGAATGGAGTTAGCAATTYGCCCTGYCRGATTCAGYYGYTCGYKCKCSGCGACGTTCGTGCTCTCGATCCAAGCGGACGGGACGTGAACGGATACGGCGAGCGATCGGCGCACTTTCGGCGGACAAGCGTCAGCATCGCTCGGCCGTGGGCGAAAAGCACTCGAGGAAGGTGAACCGCGTCTGGTTGTTAAGCCTCGTGAACGCCTGGCCCATTGCCGACCGTTTCCTCTGCGACGTGTGCCTGCCTGGCAGCTCGAACTGTCGGCTCGGCGTGTCGACTGTGGCGGACGGCACGCCTGTGCGCWCGAACTGCYGCCGRTCGAYMGKWYGATGYTCGCACAYKACGCGTCRAWRAYGCYGAC…
This study	PP410725	Skim	Animalia	Cnidaria	Anthozoa	Malacalcyonacea	Plexauridae	Muricea	Muricea pendula	yes	0	NA	no	NA	NA	GAGAGTTAAAAAGTACGTGAAACCGTTGAAAGGGAAGCGAATGGAGTTAGCAATTYGCCCTGYCRGATTCAGYYGYTCGYKCKCSGCGACGYKMKYGCYCTCGATCCAAGCGGACGGGACGTGAACGGATACGGCGAGCGATCGGCGCACTTTCGGCGGACAAGCGTCAGCATCGCTCGGCCGTGGGCGAAAAGCACTCGAGGAAGGTGAACCGCGTCTGGTTGTTAAGCCTCGTGAACGCCTGGCCCATTGCCGACCGTTTCCTCTGCGACGTGTGCCTGCCTGGCAGCTCGAACTGTCGGCTCGGCGTGTCGACYGTGGCGGACGGCACGCCTGTGCGCWCGAACTGCYGCCGRTCGAYMGKWYGATGYTCGCACAYKACGCGTCRAWRAYGCYGAC…
This study	PP410726	Skim	Animalia	Cnidaria	Anthozoa	Malacalcyonacea	Plexauridae	Muricea	Muricea pendula	yes	0	NA	no	NA	NA	GAGAGTTAAAAAGTACGTGAAACCGTTGAAAGGGAAGCGAATGGAGTTAGCAATTTGCCCTGTCGGATTCAGTCGTTCGCTCGCGGCGACGTTCGTGCTCTCGATCCAAGCGGACGGGACGTGAACGGATACGGCGAGCGATCGGCGCACTTTCGGCGGACAAGCGTCAGCATCGCTCGGCCGTGGGCGAAAMGCACTCGAGGAAGGTGAACCGCGTCTGGTTGTTAAGCCTCGTGAACGCCTGGCCCATTGCCGACCGTTTCCTCTGCGACGTGTGCCTGCCTGGCAGCTCGAACTGTCGGCTCGGCGTGTCGACTGTGGCGGACGGCACGCCTGTGCGCACGAACTGCCGCCGATCGACAGTTTGATGCTCGCACATGACGCGTCAAAAATGCCGAC…
This study	PP410727	Skim	Animalia	Cnidaria	Anthozoa	Malacalcyonacea	Plexauridae	Muricea	Muricea pendula	yes	0	NA	no	NA	NA	GAGAGTTAAAAAGTACGTGAAACCGTTGAAAGGGAAGCGAATGGAGTTAGCAATTTGCCCTGTCGGATTCAGTCGTTCGCTCGCGGCGACGTTCGTGCTCTCGATCCAAGCGGACGGGACGTGAACGGATACGGCGAGCGATCGGCGCACTTTCGGCGGACAAGCGTCAGCATCGCTCKGCCGTGGGCGAAAAGCACTCGAGGAAGGTGAACCGCGTCTGGTTGTTAAGCCTCGTGAACGCCTGGCCCATTGCCGACCGTTTCCTCTGCGACGTGTGCCTGCCTGGCAGCTCGAACTGTCGGCTCGGCGTGTCGACTGTGGCGGACGGCACGCCTGTGCGCACGAACTGCCGCCGATCGACAGTTTGATGCTCGCACATGACGCGTCAAAAATGCCGAC…
This study	PP410736	Skim	Animalia	Cnidaria	Anthozoa	Scleralcyonacea	Coralliidae		Anthomastinae sp.	yes	0	NA	no	NA	NA	GAGAGTTAAAGAGTACGTGAAACCGTTAGAAGGGAAGCGAATGAAACCAGCAATTCGCCTTGCCGGATTCAGTTGCCTGCGCTCGACCACGTGCTTGTTCGCGATTTTAGTAGACGCGACTCGCGTGTTTGGGCGAACGCAGGCGGCGCATTTCCGGCGGACGAGTGTCAGCATCAGGTGGTCTCGGGTTAGAAAGTTGCGATGAAGGTAGGTCCTTCGGGATTGTCGAGCGTCGCAAACGAATGGCCCGTCGCTGWCTGTGGTCTGTTGCAACGCGCGCCTCCCTGGGTTGGCTGGTGTCCCTTTCCTGTTGATGCGGTTGYCGACTGCGGCGGACGGCTMTGCCAGTGCGCCCAAACTGCTACCTGTCAACACGTCGGGGTACGCACACCACGCGTT…
This study	PP410740	Skim	Animalia	Cnidaria	Anthozoa	Scleralcyonacea	Coralliidae		Anthomastinae sp.	yes	0	NA	no	NA	NA	GAGAGTTAAAGAGTACGTGAAACCGTTAAAAGGGAAGCGAATGAAACCAGCAATTTGCCTTGTCGGATTCAGCBGCTTGCGCTCGAGCAAGTGCTTGTTCGCGATCTGTTTAGACGCGACYCGCGTAAGTTCCCGAGCGTAGACGGCGCACTTCCGAAAGGCAAGTGTCAGCATCAGTTGGTCACGGMTTAGAAAGTTGCGAYGAAGGTAGACCCTTCGGGGTTGTTGMGCTTCGCAAAGAAATGACCCGAGSCTCACYGTAGTCTRTTGCAATGCGCGCCAACGTTGGTTGGCTGGTGCCCTGTCCTGTTGACGCGSTTGTCGAGTGYGGCGRACGGCTTTGCCAGTGCGTCCAACCGMTGCCTGWCWACAAGTSGGAGTGTACACACCACGCGTTGA…
[truncated: 27 more rows]

## Sheet: Table S3
Table S3: mtMutS sequences of octocorals generated in this study of downloaded from GenBank for taxonomic classification, we well as analyses of the ability of the mtMutS barcode amplified with the primers described in Everett and Park (2018) to delineate taxonomic groups.
[truncated: 5,113 more rows]

[truncated: 2 more sheets: Table S4, Table S5]
